# Supplementary material for: The improvement effect of astaxanthin-loaded emulsions on obesity is better than that of astaxanthin in the oil phase
Source: Royal Society of Chemistry journal article supplement (doi:10.1039/d1fo03185f), 2022-01-01

## Supplementary data

### Figure captions

**Figure S1.** Change in the mean particle size of astaxanthin-loaded emulsion during 20 days of storage at 4°C.

**Figure S2.** Effects of AL and ASTA on body fat accumulation and food intake in normal and obese mice. (A) Body weight gain during the experiment (12 weeks). (B) Total food intake. (C) Epididymal fat index. (D) Perirenal fat index. (E) Subcutaneous fat index. (F) Mesenteric fat index. ASTA: astaxanthin in oil phase; AL: astaxanthin-loaded emulsion; N: normal diet + saline; NA: normal diet + ASTA; NAL: normal diet + AL; M: high-fat and high-sucrose diet + saline; MA: high-fat and high-sucrose diet + ASTA; MAL: high-fat and high-sucrose diet + AL. The values were evaluated after the supplementation of astaxanthin for 4 weeks at a daily dose of 30 mg/kg body weight after the mice were fed with a normal or high-fat and high-sucrose diet for 8 weeks. The values were presented as mean  $\pm$  SEM,  $n = 8$ . #  $p < 0.05$ , ##  $p < 0.01$  vs. N group; \*  $p < 0.05$ , \*\*  $p < 0.01$  vs. M group.

Figure S1

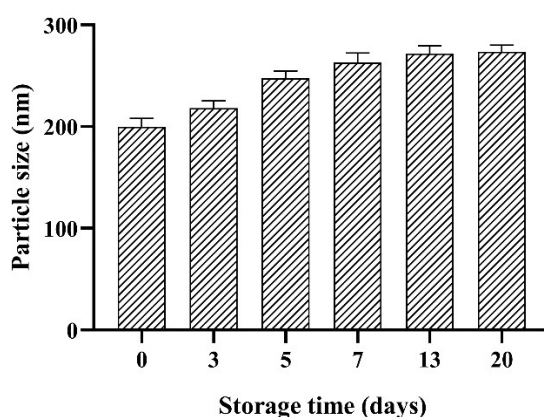

Figure S2

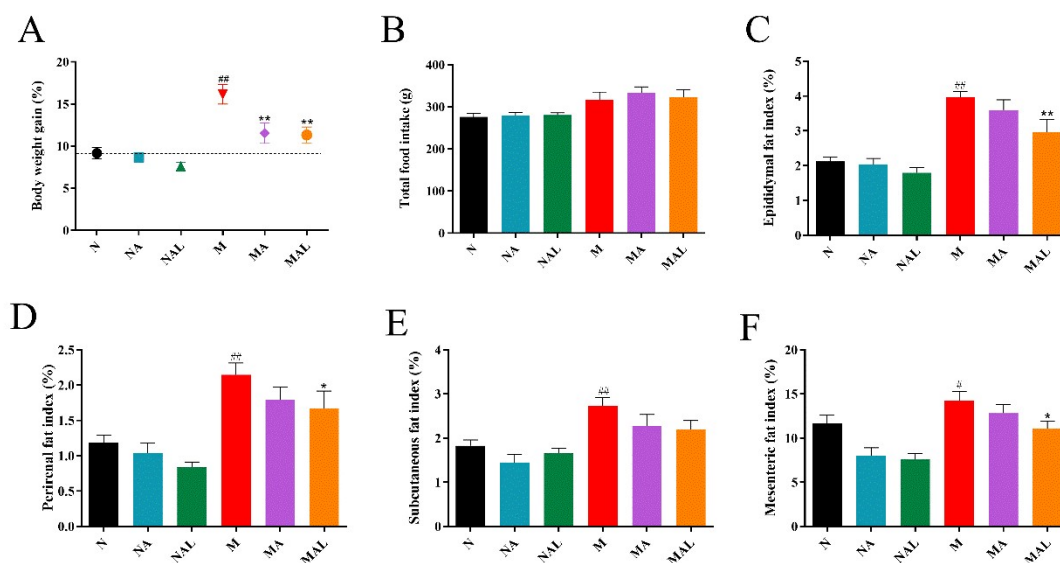

Supplement: d1fo03185f1.pdf [file d1fo03185f1.pdf]
