# Supplementary material for: The improvement effect of astaxanthin-loaded emulsions on obesity is better than that of astaxanthin in the oil phase
Source: Royal Society of Chemistry journal article supplement (doi:10.1039/d1fo03185f), 2022-01-01
Supplement: d1fo03185f2.pdf [file d1fo03185f2.pdf]

**Table S1.** Composition of Rodent Diets

| diet<br><i>product #</i>              | ND<br><i>D12450J</i> |              | HFD<br><i>D12451</i> |              |
|---------------------------------------|----------------------|--------------|----------------------|--------------|
|                                       | <i>gm%</i>           | <i>kcal%</i> | <i>gm%</i>           | <i>kcal%</i> |
| protein                               | 19.2                 | 20           | 24                   | 20           |
| carbohydrate                          | 67.3                 | 70           | 41                   | 35           |
| fat                                   | 4.3                  | 10           | 24                   | 45           |
| total                                 |                      | 100          |                      | 100          |
| kcal/gm                               | 3.85                 |              | 4.73                 |              |
| <i>ingredient</i>                     | <i>gm</i>            | <i>kcal</i>  | <i>gm</i>            | <i>kcal</i>  |
| casein                                | 200                  | 800          | 200                  | 800          |
| L-cysteine                            | 3                    | 12           | 3                    | 12           |
| corn starch                           | 506.2                | 2024.8       | 72.8                 | 291          |
| maltodextrin 10                       | 125                  | 500          | 100                  | 400          |
| sucrose                               | 68.8                 | 275.2        | 172.8                | 691          |
| cellulose, BW200                      | 50                   | 0            | 50                   | 0            |
| soybean oil                           | 25                   | 225          | 25                   | 225          |
| lard                                  | 20                   | 180          | 177.5                | 1598         |
| mineral mix, S10026                   | 10                   | 0            | 10                   | 0            |
| dicalcium phosphate                   | 13                   | 0            | 13                   | 0            |
| calcium carbonate                     | 5.5                  | 0            | 5.5                  | 0            |
| potassium citrate, 1 H <sub>2</sub> O | 16.5                 | 0            | 16.5                 | 0            |
| vitamin mix, V10001                   | 10                   | 40           | 10                   | 40           |
| choline bitartrate                    | 2                    | 0            | 2                    | 0            |
| <b>total</b>                          | <b>1055</b>          | <b>4057</b>  | <b>858.1</b>         | <b>4057</b>  |

ND, normal control diet; HFD, high-fat and high-sucrose diet.
