# Supplementary material for: The improvement effect of astaxanthin-loaded emulsions on obesity is better than that of astaxanthin in the oil phase
Source: Royal Society of Chemistry journal article supplement (doi:10.1039/d1fo03185f), 2022-01-01
Supplement: d1fo03185f3.xlsx [file d1fo03185f3.xlsx]

## Sheet: OTU table & network parameters
Table S2. OTU table and network parameters
GreenGene_ID	Global network M			Global network MA			Global network MAL			M01	M02	M03	M04	M05	M06	M07	M08	MA01	MA02	MA03	MA04	MA05	MA06	MA07	MA08	MAL01	MAL02	MAL03	MAL04	MAL05	MAL06	MAL07	MAL08	taxonomy
	Module#_M	Pi_M	Zi_M	Module#_MA	Pi_MA	Zi_MA	Module#_MAL	Pi_MAL	Zi_MAL
189503	#N/A	#N/A	#N/A	#N/A	#N/A	#N/A	#N/A	#N/A	#N/A	0	1	0	0	0	0	0	0	0	0	0	0	0	0	0	0	0	0	0	0	0	0	0	0	Bacteria|Firmicutes|Clostridia|Clostridiales|Clostridiaceae
276629	#N/A	#N/A	#N/A	#N/A	#N/A	#N/A	#N/A	#N/A	#N/A	0	0	0	0	0	0	0	0	0	0	0	0	0	0	0	0	0	0	2	0	0	0	0	1	Bacteria|Bacteroidetes|Bacteroidia|Bacteroidales|S24-7
276190	#N/A	#N/A	#N/A	#N/A	#N/A	#N/A	#N/A	#N/A	#N/A	0	0	0	0	0	0	0	0	0	0	0	0	0	0	0	0	0	0	0	0	0	0	0	1	Bacteria|Firmicutes|Clostridia|Clostridiales
262101	#N/A	#N/A	#N/A	#N/A	#N/A	#N/A	9	3.56702	0	62	12	0	20	26	53	55	77	82	16	3	15	8	34	49	213	164	72	175	9	6	58	32	16	Bacteria|Firmicutes|Erysipelotrichi|Erysipelotrichales|Erysipelotrichaceae|Allobaculum
248563	#N/A	#N/A	#N/A	#N/A	#N/A	#N/A	#N/A	#N/A	#N/A	0	1	0	1	0	0	0	0	0	0	0	0	0	0	0	0	0	0	0	0	0	0	0	0	Bacteria|Firmicutes|Clostridia|Clostridiales|Clostridiaceae
193591	27	-1	0	10	-0.935414	0	#N/A	#N/A	#N/A	22	37	37	38	22	31	31	35	32	60	0	85	80	42	22	27	40	39	1	8	13	10	66	8	Bacteria|Bacteroidetes|Bacteroidia|Bacteroidales|Bacteroidaceae|Bacteroides
262104	#N/A	#N/A	#N/A	#N/A	#N/A	#N/A	#N/A	#N/A	#N/A	0	0	0	0	0	0	0	0	0	0	11	0	0	0	0	0	0	0	0	0	0	0	0	0	Bacteria|Firmicutes|Clostridia|Clostridiales|Lachnospiraceae
263980	#N/A	#N/A	#N/A	#N/A	#N/A	#N/A	#N/A	#N/A	#N/A	0	0	0	0	0	0	0	0	0	0	0	0	0	0	0	0	0	0	0	1	0	0	0	1	Bacteria|Firmicutes|Clostridia|Clostridiales
4353745	7	-0.250982	0	26	0	0	29	0	0	13	30	34	43	18	20	31	24	12	48	0	55	65	35	20	27	25	14	0	6	3	6	50	7	Bacteria|Bacteroidetes|Bacteroidia|Bacteroidales|Bacteroidaceae|Bacteroides
197853	47	0	0	#N/A	#N/A	#N/A	11	0.533333	0	1	0	2	1	0	0	1	4	0	4	1	2	0	0	0	2	2	1	0	1	0	3	0	0	Bacteria|Firmicutes|Clostridia|Clostridiales
360717	#N/A	#N/A	#N/A	#N/A	#N/A	#N/A	#N/A	#N/A	#N/A	0	0	0	0	0	0	0	0	0	1	0	0	0	0	0	0	0	0	0	0	0	0	0	0	Bacteria|Firmicutes|Clostridia|Clostridiales|Lachnospiraceae|Blautia
330296	#N/A	#N/A	#N/A	#N/A	#N/A	#N/A	#N/A	#N/A	#N/A	0	0	0	0	0	0	0	12	0	0	0	0	0	0	0	0	0	0	0	0	0	0	0	0	Bacteria|Firmicutes|Clostridia|Clostridiales
193358	#N/A	#N/A	#N/A	#N/A	#N/A	#N/A	#N/A	#N/A	#N/A	0	0	0	0	0	1	0	0	0	0	0	0	0	0	0	0	0	2	0	0	0	0	0	0	Bacteria|Firmicutes|Clostridia|Clostridiales|Lachnospiraceae|[Ruminococcus]|gnavus
184451	34	0	0	3	0.148741	0.375	0	0.128438	0.18	15	10	18	10	9	1	17	14	0	23	2	6	5	3	0	5	7	8	6	14	2	3	2	1	Bacteria|Firmicutes|Clostridia|Clostridiales
276531	#N/A	#N/A	#N/A	#N/A	#N/A	#N/A	#N/A	#N/A	#N/A	0	0	0	0	0	0	0	0	0	4	0	0	0	0	0	0	0	0	0	1	0	1	0	0	Bacteria|Firmicutes|Clostridia|Clostridiales|Lachnospiraceae
4474844	#N/A	#N/A	#N/A	#N/A	#N/A	#N/A	#N/A	#N/A	#N/A	0	0	0	0	2	0	0	0	0	0	0	0	0	0	0	0	0	0	0	0	0	0	0	0	Bacteria|Firmicutes|Clostridia|Clostridiales|Lachnospiraceae|Coprococcus
261924	#N/A	#N/A	#N/A	#N/A	#N/A	#N/A	#N/A	#N/A	#N/A	0	0	0	0	0	0	0	0	0	0	0	0	0	0	0	0	0	1	0	0	0	0	0	0	Bacteria|Firmicutes|Clostridia|Clostridiales|Ruminococcaceae|Ruminococcus
180564	#N/A	#N/A	#N/A	#N/A	#N/A	#N/A	#N/A	#N/A	#N/A	0	1	0	0	5	0	1	0	0	0	0	0	3	0	0	1	0	0	0	0	0	1	0	0	Bacteria|Firmicutes|Clostridia|Clostridiales
3957916	#N/A	#N/A	#N/A	#N/A	#N/A	#N/A	#N/A	#N/A	#N/A	1	1	0	0	1	0	0	0	0	0	0	0	0	0	0	0	0	1	0	0	0	0	0	0	Bacteria|Firmicutes|Clostridia|Clostridiales
260529	#N/A	#N/A	#N/A	#N/A	#N/A	#N/A	#N/A	#N/A	#N/A	0	0	0	1	0	1	0	0	0	0	0	0	0	0	0	0	0	0	1	0	0	0	2	0	Bacteria|Firmicutes|Clostridia|Clostridiales|Lachnospiraceae|[Ruminococcus]|gnavus
339886	#N/A	#N/A	#N/A	16	-1.22474	0	5	-0.94114	0.666667	23	17	24	8	18	42	26	55	4	12	46	24	26	34	31	16	41	51	79	35	3	31	50	5	Bacteria|Firmicutes|Clostridia|Clostridiales
297143	#N/A	#N/A	#N/A	#N/A	#N/A	#N/A	#N/A	#N/A	#N/A	0	1	0	1	0	0	1	0	0	1	0	0	1	0	0	0	0	0	0	0	0	0	0	0	Bacteria|Firmicutes|Clostridia|Clostridiales|Peptostreptococcaceae
324143	#N/A	#N/A	#N/A	#N/A	#N/A	#N/A	#N/A	#N/A	#N/A	0	0	0	0	0	0	0	0	0	0	0	0	0	0	0	0	0	1	0	0	2	0	0	0	Bacteria|Proteobacteria|Gammaproteobacteria|Pseudomonadales|Moraxellaceae|Psychrobacter
359105	#N/A	#N/A	#N/A	#N/A	#N/A	#N/A	#N/A	#N/A	#N/A	0	0	0	0	0	0	0	0	0	0	1	0	0	0	0	0	0	0	0	0	0	0	0	0	Bacteria|Verrucomicrobia|Verrucomicrobiae|Verrucomicrobiales|Verrucomicrobiaceae|Akkermansia|muciniphila
4357712	#N/A	#N/A	#N/A	#N/A	#N/A	#N/A	#N/A	#N/A	#N/A	3	7	6	7	17	40	27	23	81	13	0	26	16	8	30	52	67	23	0	7	19	13	45	25	Bacteria|Bacteroidetes|Bacteroidia|Bacteroidales|Bacteroidaceae|Bacteroides
331881	#N/A	#N/A	#N/A	#N/A	#N/A	#N/A	7	1.27	0	0	4	0	3	1	0	0	0	0	3	1	0	4	0	0	0	1	0	2	1	0	1	2	0	Bacteria|Firmicutes|Clostridia|Clostridiales|Clostridiaceae
4442899	#N/A	#N/A	#N/A	#N/A	#N/A	#N/A	#N/A	#N/A	#N/A	1	0	0	0	0	0	0	0	0	0	0	0	0	0	0	0	0	0	0	0	0	0	0	0	Bacteria|Firmicutes|Clostridia|Clostridiales
523051	#N/A	#N/A	#N/A	#N/A	#N/A	#N/A	#N/A	#N/A	#N/A	0	0	0	0	0	0	0	0	0	0	0	0	0	0	0	0	0	0	1	0	0	0	0	0	Bacteria|Bacteroidetes|Bacteroidia|Bacteroidales|Rikenellaceae
277265	36	0	0	11	-0.312348	0.444444	37	0	0	5	9	1	3	15	4	7	3	0	3	923	0	1	2773	29521	66	19	2	69	8218	272	1	7	3012	Bacteria|Firmicutes|Clostridia|Clostridiales
230933	#N/A	#N/A	#N/A	#N/A	#N/A	#N/A	#N/A	#N/A	#N/A	1	0	0	0	0	2	0	0	0	0	0	1	0	1	1	0	0	2	3	5	0	0	0	0	Bacteria|Firmicutes|Clostridia|Clostridiales|Ruminococcaceae
311174	#N/A	#N/A	#N/A	#N/A	#N/A	#N/A	#N/A	#N/A	#N/A	0	0	0	0	0	1	0	0	0	0	0	2	0	0	0	0	0	0	0	0	0	0	0	0	Bacteria|Firmicutes|Clostridia|Clostridiales
578786	#N/A	#N/A	#N/A	9	-0.352207	0	#N/A	#N/A	#N/A	0	1	0	0	1	1	6	4	0	0	2	4	1	3	0	0	2	1	1	0	0	0	0	0	Bacteria|Firmicutes|Bacilli|Bacillales|Bacillaceae|Bacillus
269996	31	0	0	9	-0.352207	0	#N/A	#N/A	#N/A	5	7	6	1	10	1	0	4	0	3	11	4	2	4	1	1	2	3	6	3	1	3	6	1	Bacteria|Firmicutes|Clostridia|Clostridiales
187989	#N/A	#N/A	#N/A	#N/A	#N/A	#N/A	#N/A	#N/A	#N/A	0	0	0	0	0	0	0	0	0	0	0	0	0	0	1	0	0	0	0	0	0	0	0	0	Bacteria|Firmicutes|Clostridia|Clostridiales
463861	#N/A	#N/A	#N/A	#N/A	#N/A	#N/A	#N/A	#N/A	#N/A	0	0	0	3	0	0	0	0	0	0	0	0	0	0	0	0	0	0	0	0	0	0	1	0	Bacteria|Actinobacteria|Actinobacteria|Actinomycetales|Micrococcaceae|Arthrobacter
258899	#N/A	#N/A	#N/A	#N/A	#N/A	#N/A	#N/A	#N/A	#N/A	0	0	0	0	2	0	0	1	0	0	0	0	0	0	0	0	0	0	1	0	1	0	0	0	Bacteria|Firmicutes|Clostridia|Clostridiales|Ruminococcaceae
309302	#N/A	#N/A	#N/A	#N/A	#N/A	#N/A	#N/A	#N/A	#N/A	0	0	0	0	0	5	0	0	0	0	0	0	0	1	0	1	0	3	1	0	0	0	0	0	Bacteria|Firmicutes|Clostridia|Clostridiales|Ruminococcaceae|Oscillospira
1111582	23	-0.496292	0	12	-0.801784	0	53	0	0	6	1	3	1	1	1	17	3	0	9	8	4	0	5	2	1	7	2	5	2	0	1	5	1	Bacteria|Firmicutes|Bacilli|Lactobacillales|Enterococcaceae|Enterococcus
195512	#N/A	#N/A	#N/A	#N/A	#N/A	#N/A	#N/A	#N/A	#N/A	0	0	0	0	0	0	0	0	0	0	2	0	0	0	0	0	0	0	0	0	0	0	0	0	Bacteria|Firmicutes|Clostridia|Clostridiales|Lachnospiraceae|Roseburia
766768	#N/A	#N/A	#N/A	#N/A	#N/A	#N/A	#N/A	#N/A	#N/A	0	0	1	0	0	0	0	0	0	1	1	0	0	1	0	0	0	0	0	0	0	0	0	0	Bacteria|Firmicutes|Bacilli|Lactobacillales|Enterococcaceae|Enterococcus
198839	#N/A	#N/A	#N/A	#N/A	#N/A	#N/A	#N/A	#N/A	#N/A	0	0	0	0	0	0	0	0	0	0	0	0	0	0	0	0	5	0	0	0	0	0	0	6	Bacteria|Firmicutes|Clostridia|Clostridiales|Ruminococcaceae
263380	#N/A	#N/A	#N/A	#N/A	#N/A	#N/A	#N/A	#N/A	#N/A	0	0	0	0	0	0	0	0	0	0	0	0	0	0	0	0	0	0	0	1	1	0	0	0	Bacteria|Firmicutes|Clostridia|Clostridiales
172777	#N/A	#N/A	#N/A	#N/A	#N/A	#N/A	#N/A	#N/A	#N/A	0	0	0	1	0	0	0	0	0	0	0	1	0	0	1	0	0	0	0	0	1	1	0	0	Bacteria|Bacteroidetes|Bacteroidia|Bacteroidales|Bacteroidaceae|Bacteroides
334617	18	-0.403376	0	2	-0.09759	0.375	2	-1.42589	0	1	1	2	2	2	1	1	6	0	3	5	0	1	2	2	0	2	1	4	11	9	0	2	2	Bacteria|Firmicutes|Clostridia|Clostridiales|Ruminococcaceae
262633	#N/A	#N/A	#N/A	#N/A	#N/A	#N/A	#N/A	#N/A	#N/A	2	0	0	0	2	0	3	0	0	11	1	0	0	0	0	0	0	0	0	0	0	3	0	0	Bacteria|Firmicutes|Clostridia|Clostridiales|Lachnospiraceae|[Ruminococcus]|gnavus
260859	#N/A	#N/A	#N/A	#N/A	#N/A	#N/A	#N/A	#N/A	#N/A	0	0	0	0	0	0	0	0	0	0	0	1	0	0	0	0	0	0	0	0	0	0	0	0	Bacteria|Firmicutes|Clostridia|Clostridiales|Ruminococcaceae
552528	24	-1	0	#N/A	#N/A	#N/A	21	-1.17851	0	5	0	8	3	2	0	0	1	0	3	6	0	0	0	0	0	0	1	2	1	2	0	1	0	Bacteria|Bacteroidetes|Bacteroidia|Bacteroidales|Porphyromonadaceae|Parabacteroides|distasonis
3117556	7	2.57257	0	#N/A	#N/A	#N/A	3	-0.993848	0	1	0	1	0	0	0	2	2	0	0	0	1	2	0	1	0	0	4	1	1	1	7	4	1	Bacteria|Bacteroidetes|Bacteroidia|Bacteroidales|[Odoribacteraceae]|Butyricimonas
270446	#N/A	#N/A	#N/A	#N/A	#N/A	#N/A	#N/A	#N/A	#N/A	0	0	0	0	0	0	1	0	0	0	0	0	0	0	0	0	0	0	1	0	0	0	0	1	Bacteria|Bacteroidetes|Bacteroidia|Bacteroidales|S24-7
4403542	#N/A	#N/A	#N/A	#N/A	#N/A	#N/A	#N/A	#N/A	#N/A	0	0	0	0	0	0	0	0	0	0	0	1	0	0	0	0	0	0	0	0	0	0	0	0	Bacteria|Proteobacteria|Gammaproteobacteria|Enterobacteriales|Enterobacteriaceae|Enterobacter|turicensis
186352	#N/A	#N/A	#N/A	#N/A	#N/A	#N/A	#N/A	#N/A	#N/A	0	0	0	1	0	0	0	1	0	0	0	1	0	1	0	0	0	0	0	0	0	0	0	0	Bacteria|Bacteroidetes|Bacteroidia|Bacteroidales|Bacteroidaceae|Bacteroides
324326	0	0.278128	0	14	0	0	#N/A	#N/A	#N/A	58	0	0	1	56	1	22	22	0	1	0	1	21	1	5	0	2	0	8	2	0	1	0	16	Bacteria|Firmicutes|Clostridia|Clostridiales|Ruminococcaceae|Oscillospira
2851803	11	0	0	#N/A	#N/A	#N/A	3	-0.993848	0	1	1	0	1	0	2	3	1	2	1	0	3	2	0	1	2	1	1	0	1	0	0	6	2	Bacteria|Bacteroidetes|Bacteroidia|Bacteroidales|Bacteroidaceae|Bacteroides
95553	15	-0.603023	0	#N/A	#N/A	#N/A	#N/A	#N/A	#N/A	2	0	1	0	1	0	0	1	0	0	0	0	0	0	0	1	0	0	0	2	0	1	1	0	Bacteria|Firmicutes|Clostridia|Clostridiales|Lachnospiraceae
177222	#N/A	#N/A	#N/A	#N/A	#N/A	#N/A	#N/A	#N/A	#N/A	0	0	1	0	0	1	0	0	0	0	0	0	0	0	0	0	0	0	0	0	0	1	0	0	Bacteria|Bacteroidetes|Bacteroidia|Bacteroidales|Bacteroidaceae|Bacteroides
558444	#N/A	#N/A	#N/A	11	1.24939	0	5	-0.94114	0	3	5	87	0	0	52	57	2	0	0	1	0	0	64	94	5	228	2	9	50	26	5	77	0	Bacteria|Firmicutes|Clostridia|Clostridiales|Ruminococcaceae
192557	#N/A	#N/A	#N/A	#N/A	#N/A	#N/A	#N/A	#N/A	#N/A	0	0	0	0	1	0	0	0	0	0	0	0	0	1	0	0	0	0	0	0	0	0	0	0	Bacteria|Firmicutes|Clostridia|Clostridiales|Ruminococcaceae|Oscillospira
554372	#N/A	#N/A	#N/A	0	0.816497	0	#N/A	#N/A	#N/A	3	0	0	0	0	1	0	0	0	1	1	1	0	0	1	1	1	0	0	3	0	0	0	1	Bacteria|Firmicutes|Clostridia|Clostridiales|Ruminococcaceae|Oscillospira
4476780	#N/A	#N/A	#N/A	#N/A	#N/A	#N/A	#N/A	#N/A	#N/A	0	0	0	0	0	0	1	0	0	0	0	0	0	0	0	0	0	0	0	0	0	0	0	0	Bacteria|Bacteroidetes|Bacteroidia|Bacteroidales|Rikenellaceae
185917	#N/A	#N/A	#N/A	#N/A	#N/A	#N/A	#N/A	#N/A	#N/A	0	0	0	0	0	0	0	0	0	0	2	0	0	0	0	0	0	0	0	0	0	0	0	0	Bacteria|Firmicutes|Clostridia|Clostridiales
274018	#N/A	#N/A	#N/A	#N/A	#N/A	#N/A	#N/A	#N/A	#N/A	0	0	0	0	0	0	0	0	0	0	0	0	0	0	1586	0	0	0	0	0	0	0	0	0	Bacteria|Firmicutes|Clostridia|Clostridiales
3438276	#N/A	#N/A	#N/A	#N/A	#N/A	#N/A	#N/A	#N/A	#N/A	0	0	0	1	0	0	0	0	0	0	0	0	0	0	0	0	0	0	0	0	0	0	0	0	Bacteria|Firmicutes|Clostridia|Clostridiales|Clostridiaceae|Clostridium
344844	#N/A	#N/A	#N/A	#N/A	#N/A	#N/A	#N/A	#N/A	#N/A	0	1	0	1	0	0	0	0	0	1	0	0	0	0	0	0	0	1	0	0	0	0	0	0	Bacteria|Firmicutes|Clostridia|Clostridiales|Clostridiaceae
191199	7	-1.19217	0	8	-0.78039	0	8	-1.22474	0	4	0	2	1	2	1	3	1	1	0	0	1	2	1	2	6	6	4	2	8	3	3	2	5	Bacteria|Bacteroidetes|Bacteroidia|Bacteroidales|S24-7
271880	#N/A	#N/A	#N/A	#N/A	#N/A	#N/A	#N/A	#N/A	#N/A	0	0	0	0	0	0	0	0	0	0	0	0	0	0	0	0	0	0	1	0	1	0	0	0	Bacteria|Firmicutes|Clostridia|Clostridiales
343264	#N/A	#N/A	#N/A	#N/A	#N/A	#N/A	#N/A	#N/A	#N/A	0	0	0	0	0	0	0	0	0	2	0	0	0	0	0	0	51	0	0	0	0	0	0	0	Bacteria|Firmicutes|Clostridia|Clostridiales
133341	#N/A	#N/A	#N/A	#N/A	#N/A	#N/A	#N/A	#N/A	#N/A	1	0	0	0	0	0	0	0	0	0	0	0	0	0	0	1	0	0	0	0	0	0	0	0	Bacteria|Firmicutes|Bacilli|Lactobacillales|Lactobacillaceae|Lactobacillus
295146	14	-1.58114	0	#N/A	#N/A	#N/A	#N/A	#N/A	#N/A	1	1	0	3	0	2	0	0	0	20	0	1	0	0	0	0	2	0	0	0	0	0	0	0	Bacteria|Firmicutes|Bacilli|Lactobacillales|Enterococcaceae|Enterococcus
3141094	#N/A	#N/A	#N/A	#N/A	#N/A	#N/A	#N/A	#N/A	#N/A	0	0	0	0	0	0	0	0	0	0	1	0	0	0	0	0	0	0	0	0	0	0	0	0	Bacteria|Bacteroidetes|Bacteroidia|Bacteroidales|Bacteroidaceae|Bacteroides
182061	#N/A	#N/A	#N/A	#N/A	#N/A	#N/A	#N/A	#N/A	#N/A	0	1	0	0	0	0	0	0	0	0	1	0	0	0	0	0	0	1	0	2	0	1	0	0	Bacteria|Firmicutes|Clostridia|Clostridiales|Ruminococcaceae
313431	#N/A	#N/A	#N/A	#N/A	#N/A	#N/A	#N/A	#N/A	#N/A	10	0	0	39	0	0	0	0	1	0	0	19	0	0	0	1	0	0	0	0	4	2	0	0	Bacteria|Firmicutes|Clostridia|Clostridiales|Ruminococcaceae
570367	#N/A	#N/A	#N/A	#N/A	#N/A	#N/A	#N/A	#N/A	#N/A	0	0	0	0	0	0	0	0	0	0	0	0	0	0	0	0	3	0	0	0	0	0	0	0	Bacteria|Firmicutes|Clostridia|Clostridiales|Lachnospiraceae
268706	#N/A	#N/A	#N/A	#N/A	#N/A	#N/A	#N/A	#N/A	#N/A	0	0	0	0	0	1	0	0	0	0	0	0	0	1	0	0	0	6	0	2	0	0	0	0	Bacteria|Firmicutes|Clostridia|Clostridiales|Ruminococcaceae|Oscillospira
4404461	8	2.06155	0	#N/A	#N/A	#N/A	3	0.564076	0	1	1	0	0	3	1	0	1	1	1	0	1	0	1	1	0	1	3	0	1	0	0	1	1	Bacteria|Firmicutes|Clostridia|Clostridiales|Ruminococcaceae|Oscillospira
113417	9	-1.40183	0	2	0.48795	0	1	2.56138	0	2023	1343	1108	1116	3543	943	3151	1563	158	1322	1728	773	916	596	914	701	1145	2271	2113	1541	697	1261	778	608	Bacteria|Proteobacteria|Deltaproteobacteria|Desulfovibrionales|Desulfovibrionaceae
569818	#N/A	#N/A	#N/A	#N/A	#N/A	#N/A	#N/A	#N/A	#N/A	0	0	1	0	0	0	0	0	0	0	0	0	0	0	0	0	0	0	0	0	0	0	0	0	Bacteria|Firmicutes|Clostridia|Clostridiales
575041	#N/A	#N/A	#N/A	#N/A	#N/A	#N/A	#N/A	#N/A	#N/A	0	0	1	0	0	0	0	0	0	0	0	0	0	0	0	0	0	0	0	0	0	0	0	0	Bacteria|Bacteroidetes|Bacteroidia|Bacteroidales|Rikenellaceae
302641	#N/A	#N/A	#N/A	#N/A	#N/A	#N/A	#N/A	#N/A	#N/A	0	1	0	0	0	0	0	0	0	0	0	0	0	0	0	0	0	0	2	1	1	0	0	0	Bacteria|Firmicutes|Clostridia|Clostridiales|Ruminococcaceae|Oscillospira
325126	54	0	0	33	0	0	1	-0.41165	0.444444	3	1	0	4	0	12	1	10	0	0	0	3	0	1	3	2	8	12	13	3	0	0	1	0	Bacteria|Firmicutes|Clostridia|Clostridiales|Lachnospiraceae|Coprococcus
2658058	#N/A	#N/A	#N/A	#N/A	#N/A	#N/A	#N/A	#N/A	#N/A	0	0	0	0	0	1	0	0	0	0	0	1	2	0	0	0	1	0	1	0	0	0	0	0	Bacteria|Firmicutes|Clostridia|Clostridiales|Peptostreptococcaceae
193829	#N/A	#N/A	#N/A	#N/A	#N/A	#N/A	#N/A	#N/A	#N/A	0	0	0	0	0	0	0	0	0	0	4	0	0	5	0	0	0	0	0	0	0	4	4	0	Bacteria|Verrucomicrobia|Verrucomicrobiae|Verrucomicrobiales|Verrucomicrobiaceae|Akkermansia|muciniphila
199307	#N/A	#N/A	#N/A	#N/A	#N/A	#N/A	#N/A	#N/A	#N/A	0	7	0	0	0	21	0	11	0	14	16	0	0	0	3	0	2	4	18	0	0	17	17	6	Bacteria|Firmicutes|Clostridia|Clostridiales|Ruminococcaceae
4144592	#N/A	#N/A	#N/A	#N/A	#N/A	#N/A	#N/A	#N/A	#N/A	0	0	0	0	0	0	1	0	0	0	0	0	0	0	0	0	0	0	0	0	0	0	0	0	Bacteria|Bacteroidetes|Bacteroidia|Bacteroidales|Porphyromonadaceae|Parabacteroides|distasonis
274901	#N/A	#N/A	#N/A	4	1.38257	0	2	0.609117	0	0	3	0	3	0	0	0	1	0	0	3	1	1	0	0	1	1	1	0	0	0	2	0	3	Bacteria|Firmicutes|Clostridia|Clostridiales|Ruminococcaceae|Ruminococcus
345158	#N/A	#N/A	#N/A	#N/A	#N/A	#N/A	8	-0.408248	0	0	0	0	1	1	0	1	0	0	1	0	1	0	0	0	0	0	2	1	0	1	2	1	0	Bacteria|Firmicutes|Clostridia|Clostridiales
2595969	#N/A	#N/A	#N/A	#N/A	#N/A	#N/A	#N/A	#N/A	#N/A	0	0	0	0	0	0	0	0	0	0	0	0	1	0	0	0	0	0	0	0	0	0	0	0	Bacteria|Firmicutes|Clostridia|Clostridiales|Ruminococcaceae
694337	#N/A	#N/A	#N/A	#N/A	#N/A	#N/A	0	1.13025	0	0	0	0	0	0	1	0	5	0	3	0	1	0	0	10	0	8	1	6	12	0	0	0	0	Bacteria|Firmicutes|Clostridia|Clostridiales|Ruminococcaceae
331248	#N/A	#N/A	#N/A	#N/A	#N/A	#N/A	#N/A	#N/A	#N/A	0	0	0	0	0	0	0	0	0	0	0	0	0	0	0	0	0	0	2	0	0	0	0	0	Bacteria|Firmicutes|Bacilli|Lactobacillales|Lactobacillaceae|Lactobacillus
265828	#N/A	#N/A	#N/A	#N/A	#N/A	#N/A	#N/A	#N/A	#N/A	0	0	0	0	0	0	0	0	0	0	0	0	0	1	71	0	0	0	0	18	4	0	0	13	Bacteria|Firmicutes|Clostridia|Clostridiales
331717	1	0.195805	0	2	2.24457	0	#N/A	#N/A	#N/A	55	48	21	52	41	24	24	18	3	22	25	20	9	26	19	12	13	41	68	29	19	22	9	14	Bacteria|Bacteroidetes|Bacteroidia|Bacteroidales|Bacteroidaceae|Bacteroides|acidifaciens
317389	#N/A	#N/A	#N/A	#N/A	#N/A	#N/A	#N/A	#N/A	#N/A	0	0	0	0	0	0	0	0	0	2	7	0	0	0	0	0	2	0	0	0	0	0	0	0	Bacteria|Firmicutes|Clostridia|Clostridiales
335401	#N/A	#N/A	#N/A	#N/A	#N/A	#N/A	#N/A	#N/A	#N/A	0	0	0	0	0	0	0	0	0	0	0	0	2	0	0	0	0	1	0	0	0	0	0	1	Bacteria|Firmicutes|Clostridia|Clostridiales
271533	#N/A	#N/A	#N/A	#N/A	#N/A	#N/A	#N/A	#N/A	#N/A	0	0	0	0	0	0	0	0	0	0	0	0	0	0	1	1	0	1	0	0	0	0	0	0	Bacteria|Firmicutes|Clostridia|Clostridiales|Lachnospiraceae
1104908	#N/A	#N/A	#N/A	#N/A	#N/A	#N/A	#N/A	#N/A	#N/A	0	0	0	0	0	0	0	0	0	0	0	0	0	1	0	0	0	0	0	8	0	0	0	0	Bacteria|Firmicutes|Clostridia|Clostridiales|Ruminococcaceae
3472078	#N/A	#N/A	#N/A	#N/A	#N/A	#N/A	#N/A	#N/A	#N/A	0	1	1	0	1	1	0	0	0	3	0	0	0	1	1	0	0	0	0	0	0	0	0	1	Bacteria|Bacteroidetes|Bacteroidia|Bacteroidales|Bacteroidaceae|Bacteroides
299281	29	-0.57735	0	15	1.78885	0	3	0.564076	0	1	0	2	2	0	1	1	2	0	1	1	1	0	1	2	0	0	1	5	5	3	1	0	3	Bacteria|Bacteroidetes|Bacteroidia|Bacteroidales|Rikenellaceae
408513	6	-1.26035	0	2	1.07349	0	#N/A	#N/A	#N/A	35	53	28	20	65	50	14	62	3	16	55	40	21	42	34	16	39	49	67	94	45	21	68	32	Bacteria|Firmicutes|Clostridia|Clostridiales|Ruminococcaceae|Oscillospira
655725	#N/A	#N/A	#N/A	#N/A	#N/A	#N/A	#N/A	#N/A	#N/A	0	0	1	0	0	0	1	0	0	0	0	0	0	0	0	0	0	0	1	0	0	0	0	0	Bacteria|Firmicutes|Clostridia|Clostridiales|Lachnospiraceae|Coprococcus
275987	#N/A	#N/A	#N/A	#N/A	#N/A	#N/A	#N/A	#N/A	#N/A	0	0	0	0	0	0	0	0	0	0	0	0	0	0	0	0	1	0	0	0	0	0	0	0	Bacteria|Firmicutes|Clostridia|Clostridiales
134762	#N/A	#N/A	#N/A	#N/A	#N/A	#N/A	#N/A	#N/A	#N/A	0	0	0	0	0	0	0	0	0	0	0	1	1	0	0	0	0	0	0	1	1	0	0	0	Bacteria|Bacteroidetes|Bacteroidia|Bacteroidales|S24-7
210950	#N/A	#N/A	#N/A	#N/A	#N/A	#N/A	#N/A	#N/A	#N/A	0	0	0	0	0	1	2	0	0	1	0	0	0	2	0	1	0	0	0	0	1	0	0	0	Bacteria|Bacteroidetes|Bacteroidia|Bacteroidales|S24-7
265730	#N/A	#N/A	#N/A	#N/A	#N/A	#N/A	#N/A	#N/A	#N/A	0	0	0	0	0	0	0	0	0	0	0	0	0	0	0	0	0	0	1	0	0	0	1	0	Bacteria|Firmicutes|Clostridia|Clostridiales
347575	#N/A	#N/A	#N/A	#N/A	#N/A	#N/A	#N/A	#N/A	#N/A	0	3	0	0	1	3	0	0	0	1	0	0	2	0	1	0	3	0	0	0	0	0	0	0	Bacteria|Firmicutes|Clostridia|Clostridiales|Peptostreptococcaceae
264352	#N/A	#N/A	#N/A	#N/A	#N/A	#N/A	#N/A	#N/A	#N/A	0	0	0	0	0	0	1	0	0	0	0	0	0	0	0	1	0	0	1	0	0	0	0	0	Bacteria|Bacteroidetes|Bacteroidia|Bacteroidales|S24-7
1067143	2	1.18583	0	9	-0.833271	0	#N/A	#N/A	#N/A	74	84	70	137	146	87	0	182	4	71	127	66	109	78	277	66	30	124	118	0	58	63	105	33	Bacteria|Bacteroidetes|Bacteroidia|Bacteroidales|Rikenellaceae
3584772	#N/A	#N/A	#N/A	#N/A	#N/A	#N/A	#N/A	#N/A	#N/A	0	0	0	0	0	0	0	0	0	0	0	0	0	0	0	0	0	0	0	4	0	0	0	0	Bacteria|Tenericutes|Mollicutes|RF39
3439402	#N/A	#N/A	#N/A	#N/A	#N/A	#N/A	#N/A	#N/A	#N/A	2	0	0	1	0	0	1	0	0	0	0	0	0	2	1	0	0	0	0	0	0	0	0	0	Bacteria|Bacteroidetes|Bacteroidia|Bacteroidales|Bacteroidaceae|Bacteroides
555945	#N/A	#N/A	#N/A	19	0.5	0	1	-0.41165	0	2	1130	138	608	1171	802	327	37	0	1444	16	863	1121	4	245	2	742	719	1248	388	137	366	463	0	Bacteria|Firmicutes|Clostridia|Clostridiales|Clostridiaceae|SMB53
272192	12	0.164577	0	#N/A	#N/A	#N/A	22	1.26025	0	3	0	0	3	0	2	0	1	0	0	0	0	0	0	12	5	3	0	16	0	1	0	0	1	Bacteria|Firmicutes|Clostridia|Clostridiales|Ruminococcaceae|Oscillospira
258946	#N/A	#N/A	#N/A	#N/A	#N/A	#N/A	#N/A	#N/A	#N/A	0	1	1	0	0	0	0	0	0	0	0	0	0	0	0	0	0	0	0	1	1	0	0	0	Bacteria|Firmicutes|Clostridia|Clostridiales|Ruminococcaceae|Oscillospira
197074	#N/A	#N/A	#N/A	#N/A	#N/A	#N/A	5	1.5927	0	2	0	1	0	0	0	0	0	0	0	0	0	0	0	2	0	0	2	1	3	0	1	0	0	Bacteria|Bacteroidetes|Bacteroidia|Bacteroidales|S24-7
271406	#N/A	#N/A	#N/A	#N/A	#N/A	#N/A	#N/A	#N/A	#N/A	0	0	0	0	0	0	0	0	0	0	1	0	0	0	0	0	0	0	0	0	0	0	0	0	Bacteria|Firmicutes|Clostridia|Clostridiales
352612	#N/A	#N/A	#N/A	2	-0.09759	0	12	-1.0988	0	21	11	12	3	24	23	4	13	2	14	14	2	8	15	8	4	66	1	10	26	7	6	14	17	Bacteria|Firmicutes|Clostridia|Clostridiales
271152	#N/A	#N/A	#N/A	#N/A	#N/A	#N/A	#N/A	#N/A	#N/A	0	1	0	0	0	0	0	0	0	0	0	0	0	0	0	0	0	0	0	0	0	0	0	0	Bacteria|Firmicutes|Clostridia|Clostridiales|Lachnospiraceae
324884	#N/A	#N/A	#N/A	#N/A	#N/A	#N/A	#N/A	#N/A	#N/A	0	1	0	0	0	0	0	0	0	0	3	0	0	0	0	1	0	0	0	0	0	0	0	1	Bacteria|Firmicutes|Clostridia|Clostridiales|Lachnospiraceae
564140	0	-0.867106	0	15	0	0	#N/A	#N/A	#N/A	0	0	0	1	0	1	11	1	3	0	0	0	1	0	6	1	0	5	2	2	8	2	1	1	Bacteria|Bacteroidetes|Bacteroidia|Bacteroidales|Porphyromonadaceae|Parabacteroides|distasonis
342504	21	-0.591608	0	#N/A	#N/A	#N/A	#N/A	#N/A	#N/A	178	102	183	38	40	81	80	43	88	124	57	79	29	39	125	24	681	80	229	51	7	38	45	128	Bacteria|Firmicutes|Clostridia|Clostridiales|Clostridiaceae
324888	#N/A	#N/A	#N/A	#N/A	#N/A	#N/A	#N/A	#N/A	#N/A	0	0	0	0	2	0	0	0	0	0	0	0	0	0	0	0	2	0	0	0	0	1	0	0	Bacteria|Firmicutes|Bacilli|Lactobacillales|Lactobacillaceae|Lactobacillus
272757	#N/A	#N/A	#N/A	#N/A	#N/A	#N/A	0	0.462375	0	0	0	0	0	1	0	0	0	0	0	0	0	0	0	0	0	1	1	1	2	0	0	0	0	Bacteria|Firmicutes|Clostridia|Clostridiales
525199	#N/A	#N/A	#N/A	#N/A	#N/A	#N/A	#N/A	#N/A	#N/A	0	0	1	0	0	0	0	0	0	0	0	1	0	0	0	1	0	0	1	0	0	0	0	0	Bacteria|Proteobacteria|Betaproteobacteria|Burkholderiales|Comamonadaceae|Delftia
265912	#N/A	#N/A	#N/A	#N/A	#N/A	#N/A	#N/A	#N/A	#N/A	0	1	0	0	0	0	0	0	0	2	0	0	0	0	0	0	0	0	0	0	0	0	0	0	Bacteria|Firmicutes|Clostridia|Clostridiales
207284	#N/A	#N/A	#N/A	26	0	0	19	1.57512	0	0	1	0	0	1	1	0	0	1	5	0	2	2	5	0	2	2	0	0	6	2	0	0	3	Bacteria|Bacteroidetes|Bacteroidia|Bacteroidales|S24-7
367977	#N/A	#N/A	#N/A	#N/A	#N/A	#N/A	#N/A	#N/A	#N/A	0	0	6	0	0	0	0	0	0	0	0	0	0	0	0	0	0	0	0	0	0	0	0	0	Bacteria|Bacteroidetes|Bacteroidia|Bacteroidales|Rikenellaceae
637934	18	-0.0504219	0	#N/A	#N/A	#N/A	7	2.794	0	1	4	3	2	3	1	3	0	0	1	0	0	0	1	1	0	0	1	0	3	2	0	0	1	Bacteria|Firmicutes|Clostridia|Clostridiales
269037	5	-1.4596	0.5	3	0.773453	0	#N/A	#N/A	#N/A	1	2	2	1	1	1	0	2	0	4	0	1	3	0	0	1	2	3	0	1	0	0	0	0	Bacteria|Firmicutes|Clostridia|Clostridiales
175646	6	-0.58621	0	12	0.801784	0	0	-0.2055	0.21875	262	152	171	396	141	158	433	137	11	224	137	155	260	77	191	82	181	249	239	247	26	161	94	123	Bacteria|Bacteroidetes|Bacteroidia|Bacteroidales|S24-7
157704	#N/A	#N/A	#N/A	#N/A	#N/A	#N/A	#N/A	#N/A	#N/A	0	0	0	0	0	0	0	0	0	0	0	0	0	0	0	0	0	0	0	0	0	1	0	1	Bacteria|Firmicutes|Clostridia|Clostridiales
356353	#N/A	#N/A	#N/A	#N/A	#N/A	#N/A	#N/A	#N/A	#N/A	0	0	0	0	0	0	0	0	0	0	0	0	0	0	5	0	0	0	0	0	0	0	0	0	Bacteria|Firmicutes|Clostridia|Clostridiales
347714	#N/A	#N/A	#N/A	#N/A	#N/A	#N/A	#N/A	#N/A	#N/A	0	0	0	1	0	1	0	0	0	0	0	0	0	0	0	0	1	0	0	0	0	0	0	0	Bacteria|Firmicutes|Clostridia|Clostridiales|Peptostreptococcaceae
3256931	#N/A	#N/A	#N/A	#N/A	#N/A	#N/A	#N/A	#N/A	#N/A	0	0	1	1	0	0	2	0	1	0	0	0	0	0	0	0	0	0	0	0	0	0	0	0	Bacteria|Bacteroidetes|Bacteroidia|Bacteroidales|Bacteroidaceae|Bacteroides
334296	24	1	0	#N/A	#N/A	#N/A	5	0.0723954	0	1	2	1	1	1	0	0	1	0	0	0	0	0	1	0	0	0	0	2	1	0	3	0	1	Bacteria|Firmicutes|Clostridia|Clostridiales
273806	#N/A	#N/A	#N/A	#N/A	#N/A	#N/A	#N/A	#N/A	#N/A	0	0	0	0	0	1	1	2	0	0	0	0	0	0	0	0	1	0	0	0	0	0	0	0	Bacteria|Firmicutes|Clostridia|Clostridiales
579750	#N/A	#N/A	#N/A	#N/A	#N/A	#N/A	#N/A	#N/A	#N/A	0	0	0	0	0	0	0	0	0	0	0	0	0	0	0	0	0	0	2	0	0	0	0	0	Bacteria|Firmicutes|Clostridia|Clostridiales
179853	#N/A	#N/A	#N/A	#N/A	#N/A	#N/A	#N/A	#N/A	#N/A	0	0	0	0	0	0	0	0	0	0	0	0	0	0	0	0	0	0	1	0	0	0	0	0	Bacteria|Firmicutes|Clostridia|Clostridiales
194487	#N/A	#N/A	#N/A	#N/A	#N/A	#N/A	#N/A	#N/A	#N/A	0	0	0	1	1	0	1	0	0	0	0	0	0	0	0	0	0	0	0	0	0	0	0	0	Bacteria|Firmicutes|Clostridia|Clostridiales|Clostridiaceae
262917	45	0	0	15	0	0.375	#N/A	#N/A	#N/A	1	8	2	0	1	2	1	1	0	1	2	1	0	1	0	0	2	0	1	0	3	1	0	1	Bacteria|Firmicutes|Clostridia|Clostridiales
359809	#N/A	#N/A	#N/A	#N/A	#N/A	#N/A	6	-0.979806	0	70	0	0	0	0	0	66	0	0	0	2	1	0	0	0	1	1	0	0	8	0	1	9	0	Bacteria|Proteobacteria|Betaproteobacteria|Burkholderiales|Alcaligenaceae|Sutterella
298723	#N/A	#N/A	#N/A	#N/A	#N/A	#N/A	#N/A	#N/A	#N/A	0	36	0	0	0	0	0	0	0	0	0	0	0	0	0	0	0	0	0	0	0	0	0	0	Bacteria|Firmicutes|Clostridia|Clostridiales
316381	#N/A	#N/A	#N/A	21	1.1547	0	7	-0.254	0	5	12	3	2	8	6	4	5	1	1	8	8	0	6	4	0	6	2	7	9	2	7	9	4	Bacteria|Firmicutes|Clostridia|Clostridiales|Ruminococcaceae|Oscillospira
2137001	#N/A	#N/A	#N/A	#N/A	#N/A	#N/A	#N/A	#N/A	#N/A	0	0	0	0	0	0	0	0	0	0	0	0	0	1	0	0	0	0	0	0	0	0	0	0	Bacteria|Bacteroidetes|Bacteroidia|Bacteroidales|Bacteroidaceae|Bacteroides
267620	#N/A	#N/A	#N/A	#N/A	#N/A	#N/A	#N/A	#N/A	#N/A	0	0	0	0	0	0	0	0	0	1	0	0	0	0	0	0	0	0	0	0	0	0	0	0	Bacteria|Firmicutes|Clostridia|Clostridiales
1740498	42	0	0	#N/A	#N/A	#N/A	28	0	0	36	49	53	61	19	44	39	43	12	74	0	123	110	83	33	36	23	30	0	8	5	13	78	19	Bacteria|Bacteroidetes|Bacteroidia|Bacteroidales|Bacteroidaceae|Bacteroides
319708	#N/A	#N/A	#N/A	#N/A	#N/A	#N/A	#N/A	#N/A	#N/A	0	2	0	0	1	0	0	0	0	0	0	0	1	0	0	0	0	2	2	0	0	0	0	0	Bacteria|Firmicutes|Clostridia|Clostridiales|Clostridiaceae|SMB53
263207	#N/A	#N/A	#N/A	2	-0.68313	0	#N/A	#N/A	#N/A	0	0	1	0	0	0	0	2	0	0	4	0	2	2	1	1	0	1	1	0	0	0	2	0	Bacteria|Firmicutes|Clostridia|Clostridiales
373449	#N/A	#N/A	#N/A	#N/A	#N/A	#N/A	#N/A	#N/A	#N/A	0	0	0	0	0	0	0	0	0	0	0	0	0	0	0	0	0	0	2	0	0	0	0	1	Bacteria|Bacteroidetes|Bacteroidia|Bacteroidales|S24-7
3426658	#N/A	#N/A	#N/A	#N/A	#N/A	#N/A	#N/A	#N/A	#N/A	0	0	0	0	0	0	0	0	1	0	0	0	3	1	0	0	0	0	0	0	0	0	0	0	Bacteria|Bacteroidetes|Bacteroidia|Bacteroidales|Bacteroidaceae|Bacteroides
188187	#N/A	#N/A	#N/A	#N/A	#N/A	#N/A	#N/A	#N/A	#N/A	0	0	0	0	0	0	0	0	0	0	0	0	0	1	0	0	0	0	0	0	0	0	0	0	Bacteria|Bacteroidetes|Bacteroidia|Bacteroidales|S24-7
3484503	#N/A	#N/A	#N/A	#N/A	#N/A	#N/A	#N/A	#N/A	#N/A	0	0	0	0	0	0	0	0	0	0	1	0	0	0	0	0	0	0	0	0	0	0	0	0	Bacteria|Firmicutes|Clostridia|Clostridiales|Lachnospiraceae|Roseburia
577294	3	-0.974176	0	24	-0.544331	0	#N/A	#N/A	#N/A	14	2	7	8	3	0	1	6	1	11	14	1	5	1	10	12	0	0	12	2	35	21	7	6	Bacteria|Bacteroidetes|Bacteroidia|Bacteroidales|Porphyromonadaceae|Parabacteroides|distasonis
272175	17	0	0.56	34	0	0	5	0.579163	0.32	468	429	583	58	379	171	549	595	9	550	975	410	366	402	199	70	267	324	693	279	221	346	605	273	Bacteria|Firmicutes|Clostridia|Clostridiales|Lachnospiraceae
311718	#N/A	#N/A	#N/A	#N/A	#N/A	#N/A	19	-0.281272	0	0	1	0	0	1	0	0	1	0	0	0	0	0	0	0	0	0	1	1	0	0	1	1	0	Bacteria|Firmicutes|Clostridia|Clostridiales|Ruminococcaceae|Oscillospira
343906	#N/A	#N/A	#N/A	#N/A	#N/A	#N/A	0	-0.0385313	0.197531	0	0	0	0	0	0	0	6	0	0	0	1	0	0	0	12	265	10	25	49	0	0	0	0	Bacteria|Firmicutes|Clostridia|Clostridiales|Lachnospiraceae
245324	#N/A	#N/A	#N/A	16	-1.22474	0.5	2	-0.0692178	0.375	5	0	1	0	0	0	3	0	0	4	1	0	1	1	2	3	13	4	7	1	1	0	0	0	Bacteria|Actinobacteria|Coriobacteriia|Coriobacteriales|Coriobacteriaceae|Adlercreutzia
174353	#N/A	#N/A	#N/A	#N/A	#N/A	#N/A	#N/A	#N/A	#N/A	0	0	0	0	0	0	1	0	0	1	0	1	1	0	0	0	0	0	0	0	0	0	0	0	Bacteria|Firmicutes|Clostridia|Clostridiales
262825	#N/A	#N/A	#N/A	#N/A	#N/A	#N/A	#N/A	#N/A	#N/A	0	0	0	0	0	1	0	1	0	0	0	0	0	0	0	1	2	1	2	0	0	0	0	0	Bacteria|Firmicutes|Clostridia|Clostridiales|Lachnospiraceae|[Ruminococcus]|gnavus
352034	12	0.4279	0	#N/A	#N/A	#N/A	#N/A	#N/A	#N/A	1	2	0	1	0	1	0	1	0	1	0	0	0	0	0	0	0	0	0	0	0	0	0	0	Bacteria|Bacteroidetes|Bacteroidia|Bacteroidales|Bacteroidaceae|Bacteroides
3841245	#N/A	#N/A	#N/A	#N/A	#N/A	#N/A	#N/A	#N/A	#N/A	0	0	0	0	0	0	0	0	0	0	0	0	0	0	0	0	0	0	0	0	0	0	0	1	Bacteria|Actinobacteria|Actinobacteria|Actinomycetales|Corynebacteriaceae|Corynebacterium
2237211	#N/A	#N/A	#N/A	#N/A	#N/A	#N/A	11	-0.6	0	0	0	0	0	0	0	0	0	0	0	0	0	0	0	0	0	1	1	0	2	0	1	0	0	Bacteria|Bacteroidetes|Bacteroidia|Bacteroidales|Bacteroidaceae|Bacteroides
393504	#N/A	#N/A	#N/A	0	-1.22474	0	5	-0.94114	0	95	520	62	302	158	78	406	45	60	69	197	42	6	1	72	67	62	95	174	13	62	119	0	9	Bacteria|Firmicutes|Clostridia|Clostridiales|Ruminococcaceae
2875735	56	0	0	8	0.36018	0	4	-1.00037	0.5	6	4	8	5	1	3	7	3	11	10	0	6	7	4	4	8	7	5	0	0	2	1	7	6	Bacteria|Bacteroidetes|Bacteroidia|Bacteroidales|Bacteroidaceae|Bacteroides
332732	#N/A	#N/A	#N/A	#N/A	#N/A	#N/A	#N/A	#N/A	#N/A	0	0	0	0	0	0	0	0	0	1	0	0	0	0	0	0	0	0	0	0	0	0	0	0	Bacteria|Bacteroidetes|Bacteroidia|Bacteroidales|Bacteroidaceae|Bacteroides
114348	#N/A	#N/A	#N/A	#N/A	#N/A	#N/A	#N/A	#N/A	#N/A	0	0	0	0	0	1	0	0	0	0	0	0	0	0	0	0	0	2	0	0	0	0	0	0	Bacteria|Firmicutes|Clostridia|Clostridiales|Ruminococcaceae|Oscillospira
263992	#N/A	#N/A	#N/A	#N/A	#N/A	#N/A	#N/A	#N/A	#N/A	0	0	0	0	0	0	0	0	0	0	0	0	0	0	1	0	0	0	1	0	0	0	0	0	Bacteria|Firmicutes|Clostridia|Clostridiales|Lachnospiraceae
351972	27	1	0	5	2.66754	0	#N/A	#N/A	#N/A	303	647	732	239	430	326	227	395	82	446	462	545	285	345	8	131	517	550	115	459	308	339	722	183	Bacteria|Firmicutes|Clostridia|Clostridiales|Dehalobacteriaceae|Dehalobacterium
214889	#N/A	#N/A	#N/A	#N/A	#N/A	#N/A	#N/A	#N/A	#N/A	0	0	0	0	0	0	0	0	0	0	0	0	0	0	0	0	1	0	0	0	0	0	1	0	Bacteria|Bacteroidetes|Bacteroidia|Bacteroidales|S24-7
190815	#N/A	#N/A	#N/A	#N/A	#N/A	#N/A	#N/A	#N/A	#N/A	0	1	1	0	0	0	0	0	0	0	0	1	0	0	0	0	0	0	0	0	0	0	1	0	Bacteria|Bacteroidetes|Bacteroidia|Bacteroidales|Bacteroidaceae|Bacteroides
4339144	3	-0.974176	0	#N/A	#N/A	#N/A	40	0	0	333	212	402	588	209	2	752	321	3	345	1	400	966	382	220	44	108	1160	944	604	190	335	287	84	Bacteria|Bacteroidetes|Bacteroidia|Bacteroidales|[Odoribacteraceae]|Butyricimonas
2122726	#N/A	#N/A	#N/A	#N/A	#N/A	#N/A	#N/A	#N/A	#N/A	0	0	0	1	0	0	0	0	0	0	0	0	0	0	0	0	0	0	0	0	0	0	0	0	Bacteria|Firmicutes|Clostridia|Clostridiales
3172949	#N/A	#N/A	#N/A	#N/A	#N/A	#N/A	#N/A	#N/A	#N/A	0	0	1	0	0	0	0	0	0	0	0	0	0	0	0	0	0	0	0	0	0	0	0	0	Bacteria|Bacteroidetes|Bacteroidia|Bacteroidales|S24-7
266676	#N/A	#N/A	#N/A	#N/A	#N/A	#N/A	#N/A	#N/A	#N/A	0	0	0	0	0	0	0	0	0	0	0	0	0	0	1	0	0	0	0	0	0	0	0	0	Bacteria|Firmicutes|Clostridia|Clostridiales
261935	#N/A	#N/A	#N/A	#N/A	#N/A	#N/A	#N/A	#N/A	#N/A	0	0	0	1	0	0	0	0	0	0	0	0	0	0	0	0	1	1	0	0	1	0	0	0	Bacteria|Firmicutes|Erysipelotrichi|Erysipelotrichales|Erysipelotrichaceae|Allobaculum
181574	#N/A	#N/A	#N/A	#N/A	#N/A	#N/A	#N/A	#N/A	#N/A	0	0	0	0	0	0	0	0	0	0	0	0	0	0	0	1	0	0	0	0	0	0	0	0	Bacteria|Firmicutes|Clostridia|Clostridiales|Lachnospiraceae
276052	0	-0.294489	0	4	0.576072	0.48	5	3.61977	0	469	974	653	87	570	271	437	159	0	893	532	144	194	128	46	196	190	152	492	538	25	549	392	492	Bacteria|Firmicutes|Clostridia|Clostridiales
110944	#N/A	#N/A	#N/A	#N/A	#N/A	#N/A	#N/A	#N/A	#N/A	0	0	0	0	0	0	0	0	0	1	0	0	0	0	0	0	0	0	0	0	0	0	0	0	Bacteria|Firmicutes|Clostridia|Clostridiales
189585	22	-0.911322	0.444444	3	0.773453	0	20	1.41421	0	2	1	4	0	4	0	2	1	0	2	0	1	1	0	0	1	2	2	1	2	0	1	0	1	Bacteria|Firmicutes|Clostridia|Clostridiales
331150	37	0	0	3	0.773453	0	2	1.28745	0	0	4	7	0	2	0	5	6	0	3	1	2	4	1	0	2	7	4	7	3	6	0	1	0	Bacteria|Firmicutes|Clostridia|Clostridiales|Lachnospiraceae
348748	#N/A	#N/A	#N/A	#N/A	#N/A	#N/A	#N/A	#N/A	#N/A	0	0	0	0	0	0	0	0	0	0	0	0	0	0	0	0	0	0	0	0	0	1	0	0	Bacteria|Firmicutes|Clostridia|Clostridiales|Lachnospiraceae
312070	#N/A	#N/A	#N/A	#N/A	#N/A	#N/A	12	0.0578315	0	0	2	0	1	1	3	1	0	0	3	0	2	1	0	0	0	2	2	1	0	1	0	0	0	Bacteria|Firmicutes|Clostridia|Clostridiales|[Mogibacteriaceae]
261841	#N/A	#N/A	#N/A	#N/A	#N/A	#N/A	#N/A	#N/A	#N/A	0	1	0	0	1	1	0	0	0	0	0	0	0	0	0	0	1	1	0	0	0	0	0	0	Bacteria|Firmicutes|Clostridia|Clostridiales|Lachnospiraceae|Coprococcus
2558420	15	-0.603023	0	13	-1.02062	0	#N/A	#N/A	#N/A	3	1	5	1	2	0	0	4	1	3	5	0	4	1	7	6	0	0	6	3	28	3	8	2	Bacteria|Bacteroidetes|Bacteroidia|Bacteroidales|Porphyromonadaceae|Parabacteroides|distasonis
173654	#N/A	#N/A	#N/A	#N/A	#N/A	#N/A	#N/A	#N/A	#N/A	0	0	0	0	1	0	0	0	0	0	0	0	0	0	0	0	0	0	0	0	0	0	0	0	Bacteria|Proteobacteria|Gammaproteobacteria|Enterobacteriales|Enterobacteriaceae
460611	#N/A	#N/A	#N/A	#N/A	#N/A	#N/A	#N/A	#N/A	#N/A	0	0	0	0	0	0	0	0	0	0	0	0	0	0	0	0	0	0	1	0	0	0	0	0	Bacteria|Firmicutes|Clostridia|Clostridiales
258232	#N/A	#N/A	#N/A	#N/A	#N/A	#N/A	#N/A	#N/A	#N/A	0	0	0	0	0	0	0	0	0	0	0	0	0	0	0	0	1	0	0	1	0	0	0	0	Bacteria|Firmicutes|Clostridia|Clostridiales
4364744	#N/A	#N/A	#N/A	#N/A	#N/A	#N/A	#N/A	#N/A	#N/A	0	0	0	1	0	0	1	0	0	0	0	0	0	0	0	0	0	0	0	0	0	0	0	0	Bacteria|Firmicutes|Clostridia|Clostridiales|Clostridiaceae
4336731	#N/A	#N/A	#N/A	#N/A	#N/A	#N/A	#N/A	#N/A	#N/A	0	0	0	0	0	0	0	0	0	0	1	0	0	1	0	0	0	0	0	0	0	0	0	1	Bacteria|Firmicutes|Clostridia|Clostridiales|Lachnospiraceae|Roseburia
322585	#N/A	#N/A	#N/A	#N/A	#N/A	#N/A	#N/A	#N/A	#N/A	0	0	1	0	0	0	0	0	1	0	0	0	0	0	0	0	0	0	0	0	1	0	0	1	Bacteria|Firmicutes|Clostridia|Clostridiales|Lachnospiraceae
198945	#N/A	#N/A	#N/A	#N/A	#N/A	#N/A	#N/A	#N/A	#N/A	0	0	0	0	0	0	0	0	0	0	0	0	0	0	0	0	0	0	0	0	0	1	0	0	Bacteria|Firmicutes|Clostridia|Clostridiales|Lachnospiraceae
181719	18	-0.403376	0	#N/A	#N/A	#N/A	7	-0.254	0	9	5	4	23	18	10	27	0	1	4	17	4	13	17	6	13	14	50	24	9	6	7	16	2	Bacteria|Bacteroidetes|Bacteroidia|Bacteroidales|Bacteroidaceae|Bacteroides
165611	#N/A	#N/A	#N/A	#N/A	#N/A	#N/A	#N/A	#N/A	#N/A	0	0	1	0	0	0	0	0	0	0	0	0	0	0	0	0	0	0	0	0	0	0	0	0	Bacteria|Proteobacteria|Alphaproteobacteria|Rhizobiales
4341886	0	-0.294489	0	#N/A	#N/A	#N/A	21	1.17851	0.244898	5	0	0	0	0	4	2	6	0	0	0	1	0	2	1	3	0	11	7	6	0	1	4	0	Bacteria|Firmicutes|Clostridia|Clostridiales|Ruminococcaceae
215751	#N/A	#N/A	#N/A	#N/A	#N/A	#N/A	#N/A	#N/A	#N/A	0	0	0	0	0	0	0	1	0	0	0	0	0	0	0	0	0	0	0	0	0	0	0	0	Bacteria|Firmicutes|Clostridia|Clostridiales
198809	#N/A	#N/A	#N/A	#N/A	#N/A	#N/A	#N/A	#N/A	#N/A	0	0	0	0	1	0	0	0	0	0	0	0	0	0	0	0	0	0	0	0	0	0	1	0	Bacteria|Firmicutes|Clostridia|Clostridiales|Lachnospiraceae
4008675	27	1	0	6	0.307794	0	15	-1.14018	0	0	4	5	5	0	5	6	7	0	7	0	7	7	8	2	6	3	2	0	3	0	1	9	1	Bacteria|Bacteroidetes|Bacteroidia|Bacteroidales|Bacteroidaceae|Bacteroides
4443207	#N/A	#N/A	#N/A	#N/A	#N/A	#N/A	#N/A	#N/A	#N/A	0	0	0	0	0	0	0	0	0	0	0	0	0	0	0	0	1	0	0	0	0	0	0	0	Bacteria|Fusobacteria|Fusobacteriia|Fusobacteriales|Leptotrichiaceae|Leptotrichia
578960	#N/A	#N/A	#N/A	#N/A	#N/A	#N/A	#N/A	#N/A	#N/A	0	0	0	1	0	0	0	0	0	0	0	0	0	0	0	1	0	0	1	0	0	0	0	0	Bacteria|Firmicutes|Clostridia|Clostridiales|Lachnospiraceae
193784	#N/A	#N/A	#N/A	#N/A	#N/A	#N/A	#N/A	#N/A	#N/A	0	0	0	0	0	0	0	1	0	0	0	0	0	0	0	0	0	0	0	0	0	0	0	0	Bacteria|Firmicutes|Clostridia|Clostridiales|Lachnospiraceae
1666677	#N/A	#N/A	#N/A	#N/A	#N/A	#N/A	#N/A	#N/A	#N/A	1	0	0	0	0	0	0	0	0	0	0	0	0	0	0	0	0	0	0	0	0	0	0	0	Bacteria|Bacteroidetes|Bacteroidia|Bacteroidales|Bacteroidaceae|Bacteroides
340600	6	-0.58621	0	#N/A	#N/A	#N/A	21	-0.235702	0	0	0	2	1	0	0	1	2	0	2	0	0	0	0	0	0	0	1	1	1	0	0	1	0	Bacteria|Firmicutes|Clostridia|Clostridiales
656889	#N/A	#N/A	#N/A	#N/A	#N/A	#N/A	#N/A	#N/A	#N/A	0	0	0	0	0	1	0	0	0	0	0	0	0	0	0	0	0	0	0	0	0	0	0	0	Bacteria|Proteobacteria|Gammaproteobacteria|Enterobacteriales|Enterobacteriaceae|Erwinia
259056	#N/A	#N/A	#N/A	23	1.06904	0	2	-0.0692178	0	0	0	0	0	1	5	0	2	1	0	1	0	0	0	8	1	0	0	1	1	2	16	1	4	Bacteria|Firmicutes|Clostridia|Clostridiales|Lachnospiraceae|[Ruminococcus]|gnavus
353982	9	0.215666	0	2	0.48795	0	9	-0.490466	0	35	791	206	246	218	479	164	648	35	419	947	1	468	633	61	216	470	547	660	854	673	456	782	242	Bacteria|Firmicutes|Clostridia|Clostridiales|Ruminococcaceae
191216	#N/A	#N/A	#N/A	#N/A	#N/A	#N/A	#N/A	#N/A	#N/A	1	0	0	0	0	0	0	0	2	0	0	0	0	0	0	0	7	0	0	0	0	0	0	0	Bacteria|Firmicutes|Clostridia|Clostridiales|Ruminococcaceae
308707	#N/A	#N/A	#N/A	#N/A	#N/A	#N/A	#N/A	#N/A	#N/A	0	0	0	0	0	0	0	0	0	0	0	0	0	0	0	0	0	0	2	0	0	0	0	0	Bacteria|Firmicutes|Clostridia|Clostridiales|Peptostreptococcaceae
3721621	#N/A	#N/A	#N/A	#N/A	#N/A	#N/A	#N/A	#N/A	#N/A	0	0	0	1	0	0	0	0	0	0	0	0	0	0	0	0	0	0	0	0	0	0	0	0	Bacteria|Firmicutes|Clostridia|Clostridiales|Clostridiaceae
521982	2	0.0976565	0	#N/A	#N/A	#N/A	37	0	0	89	75	79	137	190	145	0	166	15	78	125	70	114	71	291	106	34	132	109	2	110	97	167	50	Bacteria|Bacteroidetes|Bacteroidia|Bacteroidales|Rikenellaceae
4481937	#N/A	#N/A	#N/A	#N/A	#N/A	#N/A	#N/A	#N/A	#N/A	0	0	0	1	0	0	0	0	0	0	3	0	1	0	0	0	0	0	0	0	1	0	0	0	Bacteria|Bacteroidetes|Bacteroidia|Bacteroidales|Bacteroidaceae|Bacteroides
289306	34	0	0	19	0.5	0	36	0	0	1	0	1	0	1	0	1	1	1	0	2	0	0	1	0	2	0	2	7	2	1	0	1	2	Bacteria|Firmicutes|Clostridia|Clostridiales|Ruminococcaceae|Oscillospira
180869	#N/A	#N/A	#N/A	#N/A	#N/A	#N/A	#N/A	#N/A	#N/A	0	0	0	0	0	0	0	0	0	0	0	0	5	0	0	0	0	0	0	0	0	0	0	0	Bacteria|Firmicutes|Erysipelotrichi|Erysipelotrichales|Erysipelotrichaceae
334935	#N/A	#N/A	#N/A	#N/A	#N/A	#N/A	#N/A	#N/A	#N/A	1	0	0	0	0	0	0	0	0	0	0	0	0	0	0	0	0	0	0	0	0	0	0	0	Bacteria|Firmicutes|Clostridia|Clostridiales|Ruminococcaceae|Oscillospira
141447	#N/A	#N/A	#N/A	#N/A	#N/A	#N/A	#N/A	#N/A	#N/A	0	0	0	0	0	0	0	0	1	0	0	0	0	0	0	0	0	0	0	0	0	0	0	0	Bacteria|Bacteroidetes|Flavobacteriia|Flavobacteriales|Flavobacteriaceae|Flavobacterium
261209	#N/A	#N/A	#N/A	10	-0.935414	0	0	-1.04034	0	17	15	6	6	10	3	6	9	2	6	19	3	5	10	5	4	11	8	9	21	4	5	5	7	Bacteria|Firmicutes|Clostridia|Clostridiales|Ruminococcaceae|Oscillospira
204093	6	0.0879316	0	#N/A	#N/A	#N/A	45	0	0	2	5	4	0	7	3	1	6	1	1	4	2	2	5	1	0	2	1	4	2	1	1	0	0	Bacteria|Firmicutes|Clostridia|Clostridiales|Ruminococcaceae|Oscillospira
248126	#N/A	#N/A	#N/A	19	0.5	0	10	1.57989	0	0	1	0	2	3	1	1	0	0	1	0	1	2	0	1	0	2	2	2	0	1	1	2	0	Bacteria|Firmicutes|Clostridia|Clostridiales|Peptostreptococcaceae
265036	#N/A	#N/A	#N/A	#N/A	#N/A	#N/A	#N/A	#N/A	#N/A	0	0	0	0	0	2	1	0	0	0	0	0	0	0	0	0	0	0	0	0	0	0	1	0	Bacteria|Firmicutes|Clostridia|Clostridiales|Ruminococcaceae
265030	#N/A	#N/A	#N/A	#N/A	#N/A	#N/A	#N/A	#N/A	#N/A	0	0	0	1	0	0	0	0	0	0	0	0	0	0	0	0	0	0	0	2	0	0	0	0	Bacteria|Firmicutes|Clostridia|Clostridiales
313764	#N/A	#N/A	#N/A	3	-1.10068	0	#N/A	#N/A	#N/A	1	1	0	1	0	0	0	0	0	2	1	1	1	0	2	5	0	0	0	0	5	0	0	0	Bacteria|Bacteroidetes|Bacteroidia|Bacteroidales|Bacteroidaceae|Bacteroides
536754	#N/A	#N/A	#N/A	#N/A	#N/A	#N/A	#N/A	#N/A	#N/A	0	0	0	2	0	0	0	0	0	0	0	0	0	0	0	0	0	0	0	1	0	0	0	0	Bacteria|Firmicutes|Bacilli|Lactobacillales|Lactobacillaceae|Lactobacillus|vaginalis
270059	3	0.885615	0.32	#N/A	#N/A	#N/A	10	-0.773137	0.625	8	22	16	2	22	10	19	11	7	16	120	2	19	8	17	3	7	14	11	16	53	38	18	6	Bacteria|Firmicutes|Clostridia|Clostridiales|Ruminococcaceae|Oscillospira
210092	#N/A	#N/A	#N/A	#N/A	#N/A	#N/A	#N/A	#N/A	#N/A	0	0	0	0	0	0	0	0	0	0	0	0	0	0	0	0	0	0	0	0	0	1	0	0	Bacteria|Firmicutes|Clostridia|Clostridiales|Lachnospiraceae|Roseburia
270051	#N/A	#N/A	#N/A	#N/A	#N/A	#N/A	#N/A	#N/A	#N/A	0	0	0	0	0	0	0	0	0	0	0	0	0	0	0	0	0	1	0	0	0	0	0	0	Bacteria|Bacteroidetes|Bacteroidia|Bacteroidales|S24-7
271230	#N/A	#N/A	#N/A	#N/A	#N/A	#N/A	#N/A	#N/A	#N/A	0	0	0	0	0	0	0	0	0	0	0	0	0	0	0	0	0	0	46	66	0	0	0	0	Bacteria|Firmicutes|Clostridia|Clostridiales
320354	#N/A	#N/A	#N/A	#N/A	#N/A	#N/A	#N/A	#N/A	#N/A	0	0	0	0	0	0	0	0	0	0	0	0	0	0	1	0	0	0	0	0	0	0	0	0	Bacteria|Firmicutes|Clostridia|Clostridiales
443620	4	-0.0980581	0	9	-0.111675	0	1	-1.00626	0	9	15	5	4	12	4	5	3	1	18	38	5	7	7	15	4	9	5	9	24	16	4	8	0	Bacteria|Firmicutes|Clostridia|Clostridiales|Ruminococcaceae|Oscillospira
175416	#N/A	#N/A	#N/A	#N/A	#N/A	#N/A	#N/A	#N/A	#N/A	1	0	0	0	0	1	1	0	0	0	1	0	1	0	0	0	0	0	0	0	0	1	0	1	Bacteria|Firmicutes|Clostridia|Clostridiales
766563	#N/A	#N/A	#N/A	#N/A	#N/A	#N/A	#N/A	#N/A	#N/A	0	0	0	0	0	0	0	0	0	1	0	0	0	0	0	0	0	0	0	0	0	0	3	0	Bacteria|Firmicutes|Bacilli|Lactobacillales|Leuconostocaceae|Leuconostoc
236734	#N/A	#N/A	#N/A	#N/A	#N/A	#N/A	#N/A	#N/A	#N/A	0	0	0	1	0	0	0	0	0	0	0	0	0	0	0	0	0	0	0	0	0	0	0	0	Bacteria|Firmicutes|Clostridia|Clostridiales|Clostridiaceae
211234	#N/A	#N/A	#N/A	#N/A	#N/A	#N/A	#N/A	#N/A	#N/A	0	0	0	0	0	0	0	0	0	0	0	0	0	0	0	0	0	0	17	0	0	0	0	0	Bacteria|Firmicutes|Clostridia|Clostridiales
170926	#N/A	#N/A	#N/A	#N/A	#N/A	#N/A	#N/A	#N/A	#N/A	0	0	0	0	0	2	0	0	0	0	0	2	0	6	15	0	0	12	21	0	0	0	0	0	Bacteria|Firmicutes|Clostridia|Clostridiales|Ruminococcaceae
315485	#N/A	#N/A	#N/A	2	0.48795	0	9	0.0891756	0	28	38	22	12	31	42	27	28	2	132	58	80	61	82	33	10	85	32	67	15	7	23	28	11	Bacteria|Actinobacteria|Coriobacteriia|Coriobacteriales|Coriobacteriaceae|Adlercreutzia
459276	#N/A	#N/A	#N/A	#N/A	#N/A	#N/A	#N/A	#N/A	#N/A	0	0	1	0	0	0	0	0	0	0	1	0	0	0	0	0	0	0	0	0	0	0	0	0	Bacteria|Firmicutes|Clostridia|Clostridiales
351734	#N/A	#N/A	#N/A	#N/A	#N/A	#N/A	#N/A	#N/A	#N/A	0	0	0	0	0	0	0	0	0	1	0	0	0	0	0	0	0	0	0	1	0	0	0	0	Bacteria|Firmicutes|Clostridia|Clostridiales|Lachnospiraceae|[Ruminococcus]|gnavus
274912	#N/A	#N/A	#N/A	#N/A	#N/A	#N/A	#N/A	#N/A	#N/A	0	0	0	0	0	0	0	0	1	0	0	0	0	0	1	2	1	0	0	0	0	0	0	0	Bacteria|Firmicutes|Erysipelotrichi|Erysipelotrichales|Erysipelotrichaceae|Allobaculum
1906483	#N/A	#N/A	#N/A	#N/A	#N/A	#N/A	#N/A	#N/A	#N/A	0	0	0	0	0	0	0	0	0	0	0	1	0	0	0	1	0	0	2	0	0	0	0	0	Bacteria|Bacteroidetes|Bacteroidia|Bacteroidales|Bacteroidaceae|Bacteroides
232257	11	0	0	25	-0.5	0	#N/A	#N/A	#N/A	0	0	3	0	2	2	1	0	0	1	2	0	0	2	2	0	0	3	1	4	0	0	0	0	Bacteria|Firmicutes|Clostridia|Clostridiales|Ruminococcaceae
265363	#N/A	#N/A	#N/A	#N/A	#N/A	#N/A	#N/A	#N/A	#N/A	0	0	0	0	0	0	1	0	0	0	0	0	0	0	0	0	0	0	0	0	0	0	0	0	Bacteria|Firmicutes|Clostridia|Clostridiales|Clostridiaceae
261519	15	0.301511	0	#N/A	#N/A	#N/A	#N/A	#N/A	#N/A	1	0	2	0	1	0	0	1	0	0	0	0	0	1	0	0	0	0	0	1	0	0	0	0	Bacteria|Firmicutes|Clostridia|Clostridiales|Ruminococcaceae|Ruminococcus
4446898	#N/A	#N/A	#N/A	#N/A	#N/A	#N/A	#N/A	#N/A	#N/A	0	1	0	0	1	0	1	0	0	0	0	1	0	0	1	0	0	0	0	0	0	1	0	0	Bacteria|Bacteroidetes|Bacteroidia|Bacteroidales|Bacteroidaceae|Bacteroides
524111	#N/A	#N/A	#N/A	#N/A	#N/A	#N/A	#N/A	#N/A	#N/A	0	0	0	0	0	0	0	0	0	0	0	1	0	0	0	0	0	0	0	0	0	0	0	0	Bacteria|Firmicutes|Clostridia|Clostridiales|Ruminococcaceae
274597	#N/A	#N/A	#N/A	#N/A	#N/A	#N/A	#N/A	#N/A	#N/A	0	0	0	0	0	0	0	0	0	0	0	0	0	0	0	1	0	0	0	0	0	0	0	0	Bacteria|Firmicutes|Clostridia|Clostridiales
347496	#N/A	#N/A	#N/A	#N/A	#N/A	#N/A	#N/A	#N/A	#N/A	0	0	0	0	0	0	0	0	0	0	0	0	0	0	4	0	0	0	0	0	0	0	0	0	Bacteria|Firmicutes|Clostridia|Clostridiales
304641	#N/A	#N/A	#N/A	#N/A	#N/A	#N/A	#N/A	#N/A	#N/A	0	0	0	0	0	0	0	0	0	0	0	1	0	0	0	0	0	0	0	0	0	0	0	0	Bacteria|Proteobacteria|Gammaproteobacteria|Enterobacteriales|Enterobacteriaceae
208409	18	-0.0504219	0	#N/A	#N/A	#N/A	11	-0.0333333	0	8	2	6	13	13	7	7	0	4	8	4	5	14	6	6	13	15	15	4	12	6	15	5	9	Bacteria|Bacteroidetes|Bacteroidia|Bacteroidales|S24-7
324524	#N/A	#N/A	#N/A	#N/A	#N/A	#N/A	13	-1.13389	0.5	0	1	0	0	0	1	0	0	0	1	0	0	0	0	5	1	1	1	2	3	0	4	1	1	Bacteria|Firmicutes|Clostridia|Clostridiales|Lachnospiraceae
1104936	#N/A	#N/A	#N/A	#N/A	#N/A	#N/A	#N/A	#N/A	#N/A	0	0	0	0	0	0	0	0	0	0	0	0	0	1	0	0	0	1	0	0	0	0	0	0	Bacteria|Proteobacteria|Gammaproteobacteria|Enterobacteriales|Enterobacteriaceae|Klebsiella
312145	#N/A	#N/A	#N/A	#N/A	#N/A	#N/A	#N/A	#N/A	#N/A	0	0	0	0	0	0	0	0	0	6	0	0	0	0	0	0	0	1	0	2	0	0	0	1	Bacteria|Firmicutes|Clostridia|Clostridiales
216495	#N/A	#N/A	#N/A	#N/A	#N/A	#N/A	#N/A	#N/A	#N/A	0	0	0	0	0	0	0	0	0	0	0	0	0	0	0	0	0	0	2	0	0	0	0	0	Bacteria|Bacteroidetes|Bacteroidia|Bacteroidales|S24-7
1105328	3	0.265684	0	4	-0.230429	0	8	-1.22474	0	173	312	221	133	249	200	348	405	53	270	182	237	257	103	276	191	352	403	437	309	131	239	128	104	Bacteria|Firmicutes|Clostridia|Clostridiales|Lachnospiraceae|Coprococcus
312140	#N/A	#N/A	#N/A	#N/A	#N/A	#N/A	#N/A	#N/A	#N/A	0	0	0	0	0	0	0	0	0	1	0	0	0	0	0	0	0	0	0	0	0	0	0	0	Bacteria|Bacteroidetes|Bacteroidia|Bacteroidales|Bacteroidaceae|Bacteroides
333178	39	0	0	#N/A	#N/A	#N/A	26	0	0	0	1	0	2	0	1	1	2	2	1	0	0	0	0	0	1	3	0	3	0	0	1	2	1	Bacteria|Firmicutes|Bacilli|Lactobacillales|Lactobacillaceae|Lactobacillus
4329450	#N/A	#N/A	#N/A	#N/A	#N/A	#N/A	#N/A	#N/A	#N/A	1	0	0	0	0	0	0	0	0	0	4	2	1	0	0	0	0	0	0	0	0	0	0	0	Bacteria|Firmicutes|Clostridia|Clostridiales|Lachnospiraceae
188940	#N/A	#N/A	#N/A	#N/A	#N/A	#N/A	#N/A	#N/A	#N/A	0	0	0	0	0	0	0	0	0	0	0	0	1	1	0	0	1	2	0	0	0	0	0	0	Bacteria|Bacteroidetes|Bacteroidia|Bacteroidales|S24-7
338926	#N/A	#N/A	#N/A	10	0	0	7	-1.016	0	2	6	0	2	2	6	3	1	1	11	6	0	4	0	3	4	14	2	11	43	1	8	7	1	Bacteria|Firmicutes|Clostridia|Clostridiales|Lachnospiraceae|Dorea
333695	#N/A	#N/A	#N/A	#N/A	#N/A	#N/A	#N/A	#N/A	#N/A	0	0	0	0	0	0	0	0	0	0	0	1	0	1	0	1	0	0	1	0	0	0	0	0	Bacteria|Bacteroidetes|Bacteroidia|Bacteroidales|S24-7
484304	#N/A	#N/A	#N/A	#N/A	#N/A	#N/A	#N/A	#N/A	#N/A	0	0	0	0	0	0	0	0	0	0	0	0	0	0	0	0	0	0	1	0	0	0	0	0	Bacteria|Actinobacteria|Actinobacteria|Bifidobacteriales|Bifidobacteriaceae|Bifidobacterium
265211	#N/A	#N/A	#N/A	#N/A	#N/A	#N/A	#N/A	#N/A	#N/A	0	0	0	0	0	0	0	0	0	0	0	0	0	0	1	0	0	0	0	1	0	0	0	0	Bacteria|Bacteroidetes|Bacteroidia|Bacteroidales|S24-7
1145388	#N/A	#N/A	#N/A	#N/A	#N/A	#N/A	#N/A	#N/A	#N/A	0	0	0	0	0	0	0	0	0	0	0	0	1	0	0	0	0	0	0	0	0	0	0	0	Bacteria|Chloroflexi|Gitt-GS-136
369079	#N/A	#N/A	#N/A	#N/A	#N/A	#N/A	#N/A	#N/A	#N/A	0	0	0	1	0	0	0	0	0	0	0	2	2	0	0	0	1	0	0	0	1	0	5	0	Bacteria|Firmicutes|Clostridia|Clostridiales|Ruminococcaceae
3443256	#N/A	#N/A	#N/A	#N/A	#N/A	#N/A	#N/A	#N/A	#N/A	0	0	0	1	0	0	0	1	0	0	0	0	1	0	0	0	0	0	0	0	0	0	0	0	Bacteria|Bacteroidetes|Bacteroidia|Bacteroidales|Bacteroidaceae|Bacteroides
860929	#N/A	#N/A	#N/A	#N/A	#N/A	#N/A	#N/A	#N/A	#N/A	0	0	0	0	0	0	0	0	0	0	0	0	0	0	0	0	1	0	0	0	0	0	0	0	Bacteria|Proteobacteria|Alphaproteobacteria|Sphingomonadales|Sphingomonadaceae
4015273	18	-0.0504219	0	2	-1.26867	0	6	-0.979806	0	5	3	1	3	5	3	3	0	0	4	2	0	2	1	1	2	0	8	8	3	2	4	1	2	Bacteria|Bacteroidetes|Bacteroidia|Bacteroidales|Bacteroidaceae|Bacteroides
214699	#N/A	#N/A	#N/A	#N/A	#N/A	#N/A	#N/A	#N/A	#N/A	0	0	0	0	0	0	0	0	0	1	0	1	0	0	0	0	0	0	0	1	0	0	0	1	Bacteria|Bacteroidetes|Bacteroidia|Bacteroidales|S24-7
516182	#N/A	#N/A	#N/A	#N/A	#N/A	#N/A	#N/A	#N/A	#N/A	0	0	0	0	1	0	0	0	0	0	0	0	0	0	0	0	0	0	0	0	0	0	0	0	Bacteria|Proteobacteria|Betaproteobacteria|Burkholderiales|Alcaligenaceae
197060	#N/A	#N/A	#N/A	#N/A	#N/A	#N/A	#N/A	#N/A	#N/A	0	0	0	2	0	0	1	0	0	0	0	0	0	0	1	0	0	0	0	0	0	0	0	0	Bacteria|Firmicutes|Clostridia|Clostridiales|Clostridiaceae
285497	#N/A	#N/A	#N/A	#N/A	#N/A	#N/A	#N/A	#N/A	#N/A	0	0	0	0	0	0	0	0	0	0	0	0	0	0	1	0	0	0	0	0	0	0	0	0	Bacteria|Proteobacteria|Alphaproteobacteria|Caulobacterales|Caulobacteraceae
344726	12	0.164577	0	10	-0.935414	0	2	-0.0692178	0	4756	25	4	175	27	6302	2	21175	1916	23	24	12014	91	7946	290	3240	14072	11451	16324	17503	2184	31	299	44	Bacteria|Firmicutes|Clostridia|Clostridiales|Lachnospiraceae
228140	#N/A	#N/A	#N/A	#N/A	#N/A	#N/A	#N/A	#N/A	#N/A	0	1	1	0	0	0	0	0	1	0	0	0	0	0	0	1	2	1	0	0	0	0	0	0	Bacteria|Firmicutes|Clostridia|Clostridiales|[Mogibacteriaceae]
195005	#N/A	#N/A	#N/A	#N/A	#N/A	#N/A	#N/A	#N/A	#N/A	0	0	0	0	0	0	0	0	0	0	0	0	0	0	1	0	0	0	0	0	0	0	0	0	Bacteria|Bacteroidetes|Bacteroidia|Bacteroidales|S24-7
272767	#N/A	#N/A	#N/A	#N/A	#N/A	#N/A	#N/A	#N/A	#N/A	0	0	0	0	0	0	0	1	0	0	0	0	0	0	0	0	0	0	0	0	0	0	0	0	Bacteria|Firmicutes|Clostridia|Clostridiales
322464	32	0	0	1	0.534994	0	47	0	0	0	0	1	6	9	1	10	0	0	3	13	2	116	39	0	0	0	4	1	19	57	2	0	0	Bacteria|Firmicutes|Clostridia|Clostridiales|Ruminococcaceae|Oscillospira
322466	10	-0.781736	0	9	-0.592739	0	#N/A	#N/A	#N/A	2	31	8	2	0	2	3	0	0	13	62	62	6	8	1	2	11	8	48	10	4	28	279	44	Bacteria|Firmicutes|Clostridia|Clostridiales
263744	#N/A	#N/A	#N/A	#N/A	#N/A	#N/A	#N/A	#N/A	#N/A	0	0	0	0	0	0	0	0	0	0	0	0	0	0	0	0	1	2	0	0	0	0	0	0	Bacteria|Firmicutes|Clostridia|Clostridiales|Ruminococcaceae|Oscillospira
296041	#N/A	#N/A	#N/A	#N/A	#N/A	#N/A	#N/A	#N/A	#N/A	0	0	0	0	0	0	0	0	0	0	1	0	0	0	0	0	0	0	0	0	0	0	0	0	Bacteria|Firmicutes|Clostridia|Clostridiales|Lachnospiraceae
4407703	#N/A	#N/A	#N/A	#N/A	#N/A	#N/A	28	-1.41421	0	13	1	3	0	2	1	13	2	1	0	2	3	0	1	1	0	5	2	0	2	5	16	3	2	Bacteria|Firmicutes|Erysipelotrichi|Erysipelotrichales|Erysipelotrichaceae|Coprobacillus
275533	#N/A	#N/A	#N/A	#N/A	#N/A	#N/A	#N/A	#N/A	#N/A	0	0	0	0	0	0	0	0	0	0	0	0	0	0	0	0	0	0	0	0	0	0	1	0	Bacteria|Firmicutes|Clostridia|Clostridiales|Lachnospiraceae
4416988	40	0	0	1	-0.237775	0.444444	5	-0.434372	0.5	0	2	1	1	1	1	5	68	0	1	7	25	4	2	3	3	0	3	3	3	0	3	4	1	Bacteria|Firmicutes|Bacilli|Bacillales|Listeriaceae|Listeria|seeligeri
176858	0	-0.867106	0	#N/A	#N/A	#N/A	19	0.337526	0	1	6	2	0	0	2	2	1	0	0	0	1	0	0	0	0	0	2	4	0	0	2	6	0	Bacteria|Firmicutes|Clostridia|Clostridiales|Lachnospiraceae|[Ruminococcus]|gnavus
258710	#N/A	#N/A	#N/A	#N/A	#N/A	#N/A	#N/A	#N/A	#N/A	0	0	0	0	0	0	0	0	0	0	0	0	0	0	0	0	0	0	0	1	0	0	0	0	Bacteria|Firmicutes|Clostridia|Clostridiales|Lachnospiraceae|[Ruminococcus]|gnavus
258717	#N/A	#N/A	#N/A	#N/A	#N/A	#N/A	#N/A	#N/A	#N/A	0	0	0	0	0	0	0	0	0	0	0	0	0	0	0	1	0	0	0	0	0	0	0	0	Bacteria|Firmicutes|Clostridia|Clostridiales|Lachnospiraceae|Dorea
433676	14	1.58114	0	#N/A	#N/A	#N/A	#N/A	#N/A	#N/A	3	4	0	11	0	1	0	0	0	5	0	0	0	0	0	2	0	0	0	0	0	0	0	0	Bacteria|Firmicutes|Bacilli|Lactobacillales|Lactobacillaceae|Lactobacillus|reuteri
440840	12	-1.15204	0	5	2.05196	0	16	0.476731	0	643	1381	856	132	1485	358	1379	323	41	953	451	595	121	334	10	97	538	26	246	283	286	155	424	140	Bacteria|Firmicutes|Clostridia|Clostridiales
382998	1	0.195805	0	#N/A	#N/A	#N/A	2	-1.42589	0	0	29	6	1	15	7	5	14	1	17	10	6	3	0	0	4	4	0	4	11	5	24	2	14	Bacteria|Firmicutes|Clostridia|Clostridiales|Ruminococcaceae
273364	#N/A	#N/A	#N/A	0	0.136083	0	10	0.168073	0	0	0	2	0	0	0	1	2	0	1	6	1	0	0	1	0	1	1	2	0	0	0	3	0	Bacteria|Firmicutes|Clostridia|Clostridiales
364034	#N/A	#N/A	#N/A	#N/A	#N/A	#N/A	#N/A	#N/A	#N/A	0	0	0	0	0	0	0	0	0	0	0	0	0	0	0	0	0	0	0	0	0	0	0	2	Bacteria|Firmicutes|Clostridia|Clostridiales|Lachnospiraceae
194656	28	1.73205	0	#N/A	#N/A	#N/A	31	0	0	0	16	8	6	13	11	1	10	2	4	11	3	6	17	3	4	5	8	34	0	7	0	7	1	Bacteria|Firmicutes|Clostridia|Clostridiales
694856	#N/A	#N/A	#N/A	#N/A	#N/A	#N/A	#N/A	#N/A	#N/A	0	0	0	0	0	0	0	0	0	0	0	0	0	0	0	0	0	0	0	0	0	0	1	0	Bacteria|Proteobacteria|Alphaproteobacteria|Rhizobiales|Methylocystaceae|Pleomorphomonas
2216525	#N/A	#N/A	#N/A	#N/A	#N/A	#N/A	#N/A	#N/A	#N/A	0	0	0	10	0	0	0	0	0	0	0	0	0	93	0	19	0	0	94	2	0	0	0	0	Bacteria|Firmicutes|Erysipelotrichi|Erysipelotrichales|Erysipelotrichaceae
103411	#N/A	#N/A	#N/A	#N/A	#N/A	#N/A	#N/A	#N/A	#N/A	0	0	0	1	0	0	0	0	0	0	0	0	0	0	0	0	0	0	0	0	0	0	0	0	Bacteria|Proteobacteria|Gammaproteobacteria|Pseudomonadales|Moraxellaceae|Acinetobacter
263895	#N/A	#N/A	#N/A	#N/A	#N/A	#N/A	#N/A	#N/A	#N/A	0	0	0	1	0	0	0	0	0	0	0	0	1	0	0	0	0	0	0	0	0	0	0	0	Bacteria|Firmicutes|Clostridia|Clostridiales|Peptococcaceae|rc4-4
258957	#N/A	#N/A	#N/A	#N/A	#N/A	#N/A	#N/A	#N/A	#N/A	0	0	0	11	0	0	1	0	0	0	0	0	0	0	0	0	0	0	0	21	0	0	0	0	Bacteria|Firmicutes|Clostridia|Clostridiales
273967	#N/A	#N/A	#N/A	#N/A	#N/A	#N/A	#N/A	#N/A	#N/A	0	1	1	0	0	0	0	0	0	0	0	0	0	0	0	0	0	0	0	0	0	0	0	0	Bacteria|Firmicutes|Clostridia|Clostridiales|Lachnospiraceae
174126	#N/A	#N/A	#N/A	#N/A	#N/A	#N/A	#N/A	#N/A	#N/A	0	0	0	0	0	0	0	0	0	0	0	0	0	0	0	0	0	0	1	1	0	0	0	0	Bacteria|Firmicutes|Clostridia|Clostridiales
411254	#N/A	#N/A	#N/A	#N/A	#N/A	#N/A	#N/A	#N/A	#N/A	0	0	0	0	0	0	0	0	0	0	2	0	0	0	0	0	0	2	1	0	0	0	2	0	Bacteria|Firmicutes|Clostridia|Clostridiales|Lachnospiraceae
189778	#N/A	#N/A	#N/A	#N/A	#N/A	#N/A	#N/A	#N/A	#N/A	0	0	1	0	0	0	0	0	0	1	0	0	0	0	0	0	0	0	0	0	1	0	1	0	Bacteria|Bacteroidetes|Bacteroidia|Bacteroidales|S24-7
268865	20	1.08012	0	#N/A	#N/A	#N/A	2	-1.42589	0	0	1	1	0	0	1	1	2	0	0	0	2	0	2	4	0	2	1	1	3	1	0	2	0	Bacteria|Firmicutes|Clostridia|Clostridiales|Ruminococcaceae
350188	7	0.690201	0	#N/A	#N/A	#N/A	#N/A	#N/A	#N/A	1	0	2	3	5	0	1	1	1	0	0	3	0	2	0	0	1	1	1	0	3	0	0	2	Bacteria|Firmicutes|Clostridia|Clostridiales
185277	#N/A	#N/A	#N/A	#N/A	#N/A	#N/A	10	0.168073	0	0	0	0	0	0	1	0	1	0	0	1	1	2	0	1	0	1	1	1	0	0	0	1	0	Bacteria|Firmicutes|Clostridia|Clostridiales|Lachnospiraceae|[Ruminococcus]|gnavus
229452	#N/A	#N/A	#N/A	7	-0.25	0	5	0.0723954	0	0	5	0	148	53	62	0	11	0	0	0	0	33	12	77	2	0	9	5	13	0	43	1	3	Bacteria|Firmicutes|Clostridia|Clostridiales
4381092	26	-0.392232	0	#N/A	#N/A	#N/A	#N/A	#N/A	#N/A	0	0	0	1	1	0	1	2	0	0	0	0	0	0	0	0	0	0	0	0	0	0	0	0	Bacteria|Firmicutes|Clostridia|Clostridiales|Clostridiaceae
178480	#N/A	#N/A	#N/A	#N/A	#N/A	#N/A	#N/A	#N/A	#N/A	0	0	0	0	0	0	0	0	0	0	1	0	0	1	0	0	0	0	0	0	0	0	0	0	Bacteria|Firmicutes|Clostridia|Clostridiales|Ruminococcaceae|Ruminococcus
197279	#N/A	#N/A	#N/A	#N/A	#N/A	#N/A	#N/A	#N/A	#N/A	0	0	0	0	0	0	0	0	0	0	0	0	0	0	0	0	0	0	0	0	0	0	1	0	Bacteria|Bacteroidetes|Bacteroidia|Bacteroidales|S24-7
273705	8	-1.03078	0	#N/A	#N/A	#N/A	#N/A	#N/A	#N/A	0	0	4	1	10	0	0	2	0	3	0	0	9	1	0	0	0	1	0	0	0	4	0	0	Bacteria|Firmicutes|Clostridia|Clostridiales
716006	5	-0.625543	0	#N/A	#N/A	#N/A	7	1.27	0	7	7	5	1	2	2	4	6	8	15	7	5	1	2	1	5	7	10	9	4	0	7	8	1	Bacteria|Firmicutes|Bacilli|Lactobacillales|Streptococcaceae|Lactococcus
1105454	#N/A	#N/A	#N/A	#N/A	#N/A	#N/A	#N/A	#N/A	#N/A	0	0	0	0	0	1	0	0	0	0	0	0	0	0	0	0	0	0	0	0	0	0	0	0	Bacteria|Firmicutes|Clostridia|Clostridiales|Ruminococcaceae
225088	#N/A	#N/A	#N/A	#N/A	#N/A	#N/A	#N/A	#N/A	#N/A	0	0	0	0	0	0	0	0	0	0	0	0	0	0	0	0	0	0	0	0	0	0	1	0	Bacteria|Proteobacteria|Gammaproteobacteria|Pseudomonadales|Pseudomonadaceae|Pseudomonas
352008	15	-0.603023	0	#N/A	#N/A	#N/A	#N/A	#N/A	#N/A	1	0	1	0	1	0	0	2	0	0	0	0	0	0	0	0	0	0	1	0	0	0	1	0	Bacteria|Firmicutes|Clostridia|Clostridiales|Lachnospiraceae|[Ruminococcus]|gnavus
350381	#N/A	#N/A	#N/A	#N/A	#N/A	#N/A	#N/A	#N/A	#N/A	0	1	0	0	0	0	0	0	0	0	0	0	0	0	1	0	0	0	0	0	0	0	0	0	Bacteria|Firmicutes|Clostridia|Clostridiales
338133	20	-1.23443	0.5	#N/A	#N/A	#N/A	15	-1.14018	0	0	4	2	0	1	2	2	4	2	1	1	2	0	1	2	0	2	4	0	12	0	2	2	0	Bacteria|Firmicutes|Clostridia|Clostridiales|Ruminococcaceae|Oscillospira
325850	20	1.08012	0	#N/A	#N/A	#N/A	14	-0.738997	0	29	128	173	12	27	258	299	218	5	120	43	60	166	14	36	203	64	2	346	330	120	13	229	122	Bacteria|Proteobacteria|Alphaproteobacteria|RF32
216902	#N/A	#N/A	#N/A	#N/A	#N/A	#N/A	#N/A	#N/A	#N/A	0	0	1	0	0	0	1	0	0	0	0	2	0	0	0	0	0	0	0	0	0	0	0	0	Bacteria|Bacteroidetes|Bacteroidia|Bacteroidales|S24-7
311031	#N/A	#N/A	#N/A	#N/A	#N/A	#N/A	#N/A	#N/A	#N/A	0	0	0	0	0	1	0	0	0	0	5	0	0	0	0	0	0	0	0	0	0	0	0	0	Bacteria|Firmicutes|Clostridia|Clostridiales
266595	22	-0.325472	0.56	#N/A	#N/A	#N/A	#N/A	#N/A	#N/A	1	1	2	0	0	0	1	1	0	0	0	0	1	1	0	0	0	0	0	2	0	0	0	0	Bacteria|Firmicutes|Clostridia|Clostridiales
392918	#N/A	#N/A	#N/A	#N/A	#N/A	#N/A	#N/A	#N/A	#N/A	0	1	0	0	0	0	0	0	0	0	0	0	1	0	0	0	0	0	0	0	0	0	0	0	Bacteria|Firmicutes|Clostridia|Clostridiales|Ruminococcaceae
360730	#N/A	#N/A	#N/A	#N/A	#N/A	#N/A	#N/A	#N/A	#N/A	0	0	0	0	0	0	0	0	0	0	0	0	0	0	0	0	0	1	0	0	0	0	0	0	Bacteria|Bacteroidetes|Bacteroidia|Bacteroidales|[Odoribacteraceae]|Butyricimonas
199731	20	-0.771517	0	#N/A	#N/A	#N/A	#N/A	#N/A	#N/A	0	1	1	0	0	1	1	1	0	1	0	0	0	0	0	0	1	0	0	1	0	0	0	0	Bacteria|Firmicutes|Clostridia|Clostridiales
383971	#N/A	#N/A	#N/A	#N/A	#N/A	#N/A	#N/A	#N/A	#N/A	0	0	1	0	0	0	0	0	0	0	0	0	0	2	0	0	1	0	0	0	0	0	0	0	Bacteria|Firmicutes|Clostridia|Clostridiales|Lachnospiraceae|[Ruminococcus]|gnavus
338553	#N/A	#N/A	#N/A	#N/A	#N/A	#N/A	#N/A	#N/A	#N/A	0	1	0	0	0	0	0	1	0	0	0	0	0	1	0	0	0	0	0	0	0	0	0	0	Bacteria|Actinobacteria|Coriobacteriia|Coriobacteriales|Coriobacteriaceae|Adlercreutzia
206817	#N/A	#N/A	#N/A	#N/A	#N/A	#N/A	#N/A	#N/A	#N/A	0	0	0	0	0	0	0	0	0	0	0	0	0	0	0	0	0	0	0	0	0	0	1	0	Bacteria|Bacteroidetes|Bacteroidia|Bacteroidales|S24-7
276513	#N/A	#N/A	#N/A	#N/A	#N/A	#N/A	#N/A	#N/A	#N/A	0	0	0	0	0	0	0	0	0	0	0	0	0	0	0	0	0	0	0	0	0	1	0	0	Bacteria|Firmicutes|Clostridia|Clostridiales
276046	#N/A	#N/A	#N/A	6	1.64157	0	7	-1.016	0	2	0	0	0	1	4	3	2	16	1	0	0	0	1	4	19	7	0	7	1	0	8	3	2	Bacteria|Firmicutes|Erysipelotrichi|Erysipelotrichales|Erysipelotrichaceae|Allobaculum
177068	#N/A	#N/A	#N/A	#N/A	#N/A	#N/A	#N/A	#N/A	#N/A	0	0	0	0	0	0	0	0	0	0	0	0	0	0	0	0	0	0	0	0	0	0	0	2	Bacteria|Firmicutes|Clostridia|Clostridiales
197891	20	-0.771517	0	22	-0.353553	0	39	0	0	0	1	1	0	0	1	1	1	0	2	0	0	1	1	0	1	1	0	2	1	1	1	0	0	Bacteria|Bacteroidetes|Bacteroidia|Bacteroidales|S24-7
218098	#N/A	#N/A	#N/A	#N/A	#N/A	#N/A	#N/A	#N/A	#N/A	0	0	1	0	0	0	0	0	0	0	0	0	0	0	0	0	0	0	0	0	0	0	0	0	Bacteria|Bacteroidetes|Bacteroidia|Bacteroidales|p-2534-18B5
277396	#N/A	#N/A	#N/A	#N/A	#N/A	#N/A	#N/A	#N/A	#N/A	0	0	0	0	0	0	0	0	0	0	0	1	0	0	2	0	0	1	2	0	1	0	0	0	Bacteria|Firmicutes|Clostridia|Clostridiales
1082294	#N/A	#N/A	#N/A	#N/A	#N/A	#N/A	#N/A	#N/A	#N/A	0	0	0	0	0	0	0	0	0	0	1	0	0	0	0	0	0	0	0	0	0	0	1	0	Bacteria|Firmicutes|Bacilli|Lactobacillales|Streptococcaceae|Streptococcus
267514	#N/A	#N/A	#N/A	#N/A	#N/A	#N/A	#N/A	#N/A	#N/A	1	0	0	0	1	0	0	0	1	0	0	0	0	0	0	0	2	0	0	0	0	0	0	0	Bacteria|Firmicutes|Clostridia|Clostridiales|Lachnospiraceae|Coprococcus
259195	#N/A	#N/A	#N/A	#N/A	#N/A	#N/A	#N/A	#N/A	#N/A	0	1	0	0	1	0	0	0	0	0	0	1	0	0	0	0	0	0	1	0	0	0	0	0	Bacteria|Firmicutes|Clostridia|Clostridiales|Ruminococcaceae|Ruminococcus
515265	#N/A	#N/A	#N/A	#N/A	#N/A	#N/A	#N/A	#N/A	#N/A	0	0	0	0	0	0	0	1	0	0	0	0	0	0	0	0	0	0	0	0	0	0	0	0	Bacteria|Proteobacteria|Gammaproteobacteria|Pseudomonadales|Moraxellaceae|Acinetobacter
1521602	#N/A	#N/A	#N/A	#N/A	#N/A	#N/A	#N/A	#N/A	#N/A	0	0	0	0	0	0	1	0	0	0	0	0	0	0	0	0	0	0	0	0	0	0	0	0	Bacteria|Firmicutes|Clostridia|Clostridiales|Clostridiaceae
4366843	#N/A	#N/A	#N/A	#N/A	#N/A	#N/A	#N/A	#N/A	#N/A	0	0	0	0	0	0	0	0	0	0	0	0	0	1	0	0	0	1	0	0	0	0	0	0	Bacteria|Bacteroidetes|Bacteroidia|Bacteroidales|Bacteroidaceae|Bacteroides
4379961	#N/A	#N/A	#N/A	#N/A	#N/A	#N/A	#N/A	#N/A	#N/A	0	0	0	0	0	0	0	0	0	0	2	0	1	0	0	0	0	0	0	0	0	0	0	0	Bacteria|Firmicutes|Erysipelotrichi|Erysipelotrichales|Erysipelotrichaceae|Allobaculum
579608	0	-0.294489	0	#N/A	#N/A	#N/A	10	0.168073	0	1	1	3	0	0	1	1	1	0	7	4	0	0	0	1	0	3	1	4	0	0	0	2	1	Bacteria|Firmicutes|Bacilli|Lactobacillales|Streptococcaceae|Streptococcus
842596	#N/A	#N/A	#N/A	#N/A	#N/A	#N/A	#N/A	#N/A	#N/A	0	0	0	0	0	0	0	1	0	0	1	0	0	0	0	0	0	0	0	0	0	0	0	0	Bacteria|Firmicutes|Clostridia|Clostridiales|Lachnospiraceae|Coprococcus
181707	#N/A	#N/A	#N/A	7	-0.25	0	#N/A	#N/A	#N/A	0	0	0	0	1	2	0	0	3	1	3	0	0	0	0	6	1	0	1	0	1	1	0	1	Bacteria|Firmicutes|Clostridia|Clostridiales|Lachnospiraceae|[Ruminococcus]|gnavus
177113	#N/A	#N/A	#N/A	#N/A	#N/A	#N/A	#N/A	#N/A	#N/A	0	0	1	0	0	0	0	0	0	0	0	0	0	0	0	0	0	0	0	0	0	0	0	1	Bacteria|Firmicutes|Clostridia|Clostridiales|Ruminococcaceae|Oscillospira
215214	#N/A	#N/A	#N/A	#N/A	#N/A	#N/A	#N/A	#N/A	#N/A	0	0	0	0	0	0	0	0	0	3	0	1	0	0	0	0	0	0	0	0	7	0	1	0	Bacteria|Bacteroidetes|Bacteroidia|Bacteroidales|S24-7
593369	#N/A	#N/A	#N/A	#N/A	#N/A	#N/A	10	-0.302532	0	1	0	0	0	0	1	0	0	0	0	0	0	0	1	0	0	1	1	1	0	0	0	1	1	Bacteria|Firmicutes|Clostridia|Clostridiales|Lachnospiraceae|Dorea
191445	50	0	0	5	0.205196	0	2	-1.42589	0	10	59	11	1	43	4	1	7	1	21	71	4	35	7	0	2	4	0	18	99	47	51	103	93	Bacteria|Firmicutes|Clostridia|Clostridiales|Ruminococcaceae|Oscillospira
299179	#N/A	#N/A	#N/A	#N/A	#N/A	#N/A	#N/A	#N/A	#N/A	0	0	0	0	0	0	0	0	0	0	1	0	1	0	0	0	0	0	0	0	0	0	0	0	Bacteria|Firmicutes|Clostridia|Clostridiales|Lachnospiraceae
259266	#N/A	#N/A	#N/A	#N/A	#N/A	#N/A	#N/A	#N/A	#N/A	0	0	0	0	0	0	0	0	0	0	0	0	0	0	0	0	0	0	0	0	1	0	0	0	Bacteria|Firmicutes|Erysipelotrichi|Erysipelotrichales|Erysipelotrichaceae
259263	#N/A	#N/A	#N/A	#N/A	#N/A	#N/A	#N/A	#N/A	#N/A	1	1	0	0	0	0	0	0	0	0	0	0	0	0	1	0	0	0	0	1	0	0	1	0	Bacteria|Firmicutes|Clostridia|Clostridiales|Lachnospiraceae|[Ruminococcus]|gnavus
4369272	23	-0.496292	0.444444	6	-1.02598	0.5	#N/A	#N/A	#N/A	1	3	4	11	14	16	0	10	14	1	0	2	4	3	20	22	0	9	0	0	0	0	0	44	Bacteria|Bacteroidetes|Bacteroidia|Bacteroidales|Porphyromonadaceae|Parabacteroides
342105	#N/A	#N/A	#N/A	#N/A	#N/A	#N/A	#N/A	#N/A	#N/A	6	4	16	3	2	15	11	20	8	20	36	11	16	8	0	8	29	6	21	14	6	20	29	5	Bacteria|Firmicutes|Clostridia|Clostridiales
191205	#N/A	#N/A	#N/A	#N/A	#N/A	#N/A	10	0.168073	0	0	0	1	0	1	0	0	2	0	3	4	0	0	0	1	0	1	1	1	0	0	2	1	1	Bacteria|Firmicutes|Clostridia|Clostridiales|Lachnospiraceae|[Ruminococcus]|gnavus
165241	#N/A	#N/A	#N/A	#N/A	#N/A	#N/A	#N/A	#N/A	#N/A	0	0	0	0	0	0	1	0	0	0	0	0	0	0	0	0	0	0	0	1	0	0	0	0	Bacteria|Firmicutes|Clostridia|Clostridiales|Lachnospiraceae
166226	#N/A	#N/A	#N/A	18	1	0	0	-0.372469	0.244898	0	0	0	0	0	11	1	671	2	0	0	48	0	906	2875	6	24	7	25	8	0	1	0	0	Bacteria|Firmicutes|Clostridia|Clostridiales|Ruminococcaceae|Oscillospira
260653	#N/A	#N/A	#N/A	11	-0.312348	0	1	1.96677	0	2	1	2	0	2	4	2	5	0	3	1	5	3	0	0	0	2	2	2	2	1	1	2	0	Bacteria|Firmicutes|Clostridia|Clostridiales
443945	#N/A	#N/A	#N/A	#N/A	#N/A	#N/A	#N/A	#N/A	#N/A	0	0	0	0	0	0	0	0	0	0	0	1	0	0	0	0	0	0	0	0	0	0	0	0	Bacteria|Firmicutes|Clostridia|Clostridiales
270423	#N/A	#N/A	#N/A	#N/A	#N/A	#N/A	#N/A	#N/A	#N/A	0	0	0	0	0	0	0	0	0	0	0	0	0	0	1	0	0	0	0	0	0	0	0	0	Bacteria|Firmicutes|Clostridia|Clostridiales
3929758	#N/A	#N/A	#N/A	#N/A	#N/A	#N/A	#N/A	#N/A	#N/A	0	0	0	0	0	0	0	0	0	1	0	0	0	0	0	0	0	0	0	0	0	0	0	0	Bacteria|Bacteroidetes|Bacteroidia|Bacteroidales|Bacteroidaceae|Bacteroides|caccae
204088	6	0.762073	0	#N/A	#N/A	#N/A	14	3.10379	0	3	2	1	0	3	2	0	0	1	1	3	6	0	0	0	4	5	1	5	7	1	1	4	4	Bacteria|Bacteroidetes|Bacteroidia|Bacteroidales|S24-7
95570	#N/A	#N/A	#N/A	#N/A	#N/A	#N/A	#N/A	#N/A	#N/A	0	0	1	0	0	0	0	0	0	0	0	0	0	0	0	0	0	0	0	0	0	0	0	0	Bacteria|Firmicutes|Clostridia|Clostridiales|Ruminococcaceae|Ruminococcus
1106614	5	1.04257	0	#N/A	#N/A	#N/A	16	0.476731	0	0	5	5	0	0	0	1	3	0	12	1	0	0	7	0	1	2	0	3	23	5	0	8	0	Bacteria|Firmicutes|Clostridia|Clostridiales
345557	#N/A	#N/A	#N/A	#N/A	#N/A	#N/A	#N/A	#N/A	#N/A	0	0	0	0	0	0	0	0	0	0	1	0	0	0	0	0	0	0	0	0	0	0	0	0	Bacteria|Firmicutes|Clostridia|Clostridiales
261277	0	0.278128	0.375	#N/A	#N/A	#N/A	0	0.629344	0.32	3	0	0	0	0	3	1	12	2	0	0	9	0	5	0	3	9	5	18	12	1	0	0	0	Bacteria|Firmicutes|Clostridia|Clostridiales|Lachnospiraceae
267549	#N/A	#N/A	#N/A	#N/A	#N/A	#N/A	#N/A	#N/A	#N/A	0	0	0	0	0	0	0	0	0	0	0	0	0	1	12	0	0	0	0	0	1	0	0	3	Bacteria|Firmicutes|Clostridia|Clostridiales
97263	#N/A	#N/A	#N/A	#N/A	#N/A	#N/A	#N/A	#N/A	#N/A	0	0	0	0	0	0	1	0	0	0	0	0	0	0	0	0	0	0	0	0	0	0	0	0	Bacteria|Firmicutes|Clostridia|Clostridiales|Ruminococcaceae
4343940	#N/A	#N/A	#N/A	#N/A	#N/A	#N/A	#N/A	#N/A	#N/A	0	1	0	1	0	0	0	0	0	1	0	0	2	0	0	0	1	1	0	0	0	0	1	0	Bacteria|Firmicutes|Clostridia|Clostridiales|Peptostreptococcaceae
290241	#N/A	#N/A	#N/A	#N/A	#N/A	#N/A	#N/A	#N/A	#N/A	0	0	0	0	1	0	0	0	0	0	0	0	0	0	0	0	0	0	0	0	0	0	0	0	Bacteria|Firmicutes|Clostridia|Clostridiales|Clostridiaceae|Clostridium|perfringens
274619	3	0.885615	0	2	1.07349	0.277778	5	0.579163	0	4	2	2	1	3	0	2	3	0	2	8	0	1	5	8	3	0	1	8	6	0	3	5	2	Bacteria|Firmicutes|Clostridia|Clostridiales|Christensenellaceae
4315395	#N/A	#N/A	#N/A	#N/A	#N/A	#N/A	2	1.28745	0.277778	0	0	0	18	193	0	0	0	0	0	0	0	0	0	0	0	1	0	5	106	12	0	0	0	Bacteria|Firmicutes|Clostridia|Clostridiales
175906	#N/A	#N/A	#N/A	#N/A	#N/A	#N/A	#N/A	#N/A	#N/A	0	0	0	0	0	0	0	0	0	0	0	0	0	0	0	0	0	0	0	0	0	0	1	0	Bacteria|Firmicutes|Clostridia|Clostridiales
320169	#N/A	#N/A	#N/A	#N/A	#N/A	#N/A	#N/A	#N/A	#N/A	0	0	0	0	0	0	1	0	0	0	0	0	0	0	18	0	0	0	0	0	0	0	1	0	Bacteria|Bacteroidetes|Bacteroidia|Bacteroidales|S24-7
4334618	#N/A	#N/A	#N/A	#N/A	#N/A	#N/A	#N/A	#N/A	#N/A	0	0	0	0	0	0	0	0	0	0	0	0	0	0	1	0	0	0	0	0	0	0	0	0	Bacteria|Firmicutes|Clostridia|Clostridiales|Ruminococcaceae|Oscillospira
309720	#N/A	#N/A	#N/A	#N/A	#N/A	#N/A	#N/A	#N/A	#N/A	37	0	0	0	0	0	4	7	0	0	0	0	0	0	0	0	90	0	0	0	0	0	1	0	Bacteria|Firmicutes|Clostridia|Clostridiales|Ruminococcaceae
262166	#N/A	#N/A	#N/A	#N/A	#N/A	#N/A	#N/A	#N/A	#N/A	1	0	0	0	0	0	0	0	0	0	0	0	0	1	0	0	1	0	0	3	0	0	0	0	Bacteria|Bacteroidetes|Bacteroidia|Bacteroidales|S24-7
268720	#N/A	#N/A	#N/A	#N/A	#N/A	#N/A	11	-0.6	0	0	0	0	0	0	2	0	0	1	0	0	0	1	0	0	1	3	4	0	1	1	1	0	0	Bacteria|Firmicutes|Clostridia|Clostridiales|Ruminococcaceae|Ruminococcus
268725	2	-0.990516	0	46	0	0	#N/A	#N/A	#N/A	0	1	1	0	2	1	0	0	0	1	0	0	1	1	1	2	2	0	1	0	0	3	1	2	Bacteria|Firmicutes|Clostridia|Clostridiales|Ruminococcaceae|Oscillospira
274297	#N/A	#N/A	#N/A	#N/A	#N/A	#N/A	0	1.13025	0	0	0	0	0	0	2	0	0	0	0	0	0	0	0	4	4	1	1	2	2	0	0	0	0	Bacteria|Firmicutes|Clostridia|Clostridiales|Ruminococcaceae|Oscillospira
269125	#N/A	#N/A	#N/A	#N/A	#N/A	#N/A	#N/A	#N/A	#N/A	0	0	0	0	0	0	0	0	0	1	0	0	0	0	0	0	0	0	0	0	0	0	0	0	Bacteria|Firmicutes|Bacilli|Lactobacillales|Lactobacillaceae|Lactobacillus
336276	#N/A	#N/A	#N/A	#N/A	#N/A	#N/A	#N/A	#N/A	#N/A	0	0	0	0	1	0	0	0	1	0	1	0	0	0	0	0	0	0	0	0	0	0	0	0	Bacteria|Firmicutes|Clostridia|Clostridiales
333351	#N/A	#N/A	#N/A	#N/A	#N/A	#N/A	#N/A	#N/A	#N/A	0	0	0	0	0	0	0	0	0	0	0	0	0	0	0	0	0	0	1	0	0	0	0	0	Bacteria|Firmicutes|Clostridia|Clostridiales
349246	#N/A	#N/A	#N/A	0	0.136083	0	15	-1.14018	0	1	20	5	1	9	18	8	14	2	15	22	9	6	2	21	3	8	13	10	17	2	17	9	5	Bacteria|Firmicutes|Clostridia|Clostridiales|Ruminococcaceae
743911	#N/A	#N/A	#N/A	#N/A	#N/A	#N/A	#N/A	#N/A	#N/A	0	2	0	0	0	0	0	0	0	0	0	0	1	2	0	0	0	0	0	1	0	25	0	0	Bacteria|Firmicutes|Clostridia|Clostridiales|Lachnospiraceae
4449518	20	1.08012	0.244898	9	-0.833271	0	#N/A	#N/A	#N/A	0	3	2	0	0	6	2	0	6	3	23	0	0	0	7	2	0	0	9	0	1	6	0	0	Bacteria|Bacteroidetes|Bacteroidia|Bacteroidales|Rikenellaceae
198788	#N/A	#N/A	#N/A	#N/A	#N/A	#N/A	#N/A	#N/A	#N/A	0	0	0	0	0	0	0	0	1	0	0	0	0	0	0	0	0	0	0	0	1	0	0	0	Bacteria|Bacteroidetes|Bacteroidia|Bacteroidales|Bacteroidaceae|Bacteroides
351976	#N/A	#N/A	#N/A	#N/A	#N/A	#N/A	#N/A	#N/A	#N/A	0	0	0	0	0	0	0	0	0	0	0	1	0	0	0	0	0	0	0	0	0	0	0	0	Bacteria|Firmicutes|Clostridia|Clostridiales|Peptostreptococcaceae
197782	#N/A	#N/A	#N/A	#N/A	#N/A	#N/A	#N/A	#N/A	#N/A	0	0	0	0	0	0	0	1	0	0	0	0	0	0	0	0	0	0	0	0	0	0	0	0	Bacteria|Firmicutes|Clostridia|Clostridiales|Ruminococcaceae
185281	#N/A	#N/A	#N/A	#N/A	#N/A	#N/A	#N/A	#N/A	#N/A	0	0	0	0	0	1	0	0	0	0	0	0	0	0	0	0	2	0	0	0	0	0	0	0	Bacteria|Firmicutes|Clostridia|Clostridiales|Lachnospiraceae|Dorea
742358	13	0	0	7	0.8125	0	18	-1.02062	0	5	0	0	1	0	1	1	0	0	0	0	8	4	2	2	0	11	1	3	3	0	1	1	2	Bacteria|Actinobacteria|Coriobacteriia|Coriobacteriales|Coriobacteriaceae
274722	#N/A	#N/A	#N/A	#N/A	#N/A	#N/A	#N/A	#N/A	#N/A	0	0	0	0	0	0	0	0	0	0	0	1	0	0	0	0	0	0	0	0	0	0	0	0	Bacteria|Firmicutes|Clostridia|Clostridiales
186122	#N/A	#N/A	#N/A	#N/A	#N/A	#N/A	#N/A	#N/A	#N/A	0	0	0	0	0	0	0	0	0	0	0	0	0	0	0	0	1	0	0	0	0	0	0	0	Bacteria|Firmicutes|Clostridia|Clostridiales|Lachnospiraceae
1105326	#N/A	#N/A	#N/A	#N/A	#N/A	#N/A	#N/A	#N/A	#N/A	0	0	0	0	0	0	0	0	0	0	0	0	0	0	0	0	0	0	1	0	0	0	0	0	Bacteria|Firmicutes|Clostridia|Clostridiales
1135084	11	-1.06066	0	#N/A	#N/A	#N/A	2	-0.747553	0	0	0	3	0	2	8	6	1	2	6	47	1	2	4	5	11	14	0	11	52	31	7	20	3	Bacteria|Bacteroidetes|Bacteroidia|Bacteroidales|Bacteroidaceae|Bacteroides
812902	#N/A	#N/A	#N/A	#N/A	#N/A	#N/A	#N/A	#N/A	#N/A	0	0	0	0	0	0	0	0	0	0	0	0	0	0	0	0	1	1	0	0	0	0	0	0	Bacteria|Actinobacteria|Actinobacteria|Actinomycetales|Micrococcaceae|Arthrobacter
346559	#N/A	#N/A	#N/A	#N/A	#N/A	#N/A	10	0.168073	0	0	0	0	1	0	0	0	0	0	0	0	0	0	0	0	1	1	1	1	0	0	0	1	0	Bacteria|Firmicutes|Clostridia|Clostridiales|Lachnospiraceae
187466	#N/A	#N/A	#N/A	#N/A	#N/A	#N/A	#N/A	#N/A	#N/A	0	0	0	0	1	1	0	0	0	0	0	0	0	0	0	0	0	0	0	0	0	0	0	0	Bacteria|Firmicutes|Clostridia|Clostridiales|Clostridiaceae
3358082	21	0	0	#N/A	#N/A	#N/A	#N/A	#N/A	#N/A	0	1	0	3	1	0	2	1	0	0	0	0	0	0	0	0	0	0	0	0	0	0	1	0	Bacteria|Firmicutes|Clostridia|Clostridiales|Clostridiaceae
353057	#N/A	#N/A	#N/A	#N/A	#N/A	#N/A	#N/A	#N/A	#N/A	0	0	0	0	0	0	0	0	0	0	0	0	0	0	1	0	0	0	0	0	0	0	0	0	Bacteria|Firmicutes|Clostridia|Clostridiales|Ruminococcaceae
278609	#N/A	#N/A	#N/A	#N/A	#N/A	#N/A	#N/A	#N/A	#N/A	0	0	0	0	0	0	0	0	0	0	0	0	0	0	1	0	0	0	0	0	0	0	0	0	Bacteria|Firmicutes|Clostridia|Clostridiales|Ruminococcaceae|Oscillospira
275746	#N/A	#N/A	#N/A	#N/A	#N/A	#N/A	#N/A	#N/A	#N/A	0	0	0	0	0	0	0	0	0	0	2	0	0	6	57	0	0	0	0	6	0	0	0	3	Bacteria|Firmicutes|Clostridia|Clostridiales
269585	#N/A	#N/A	#N/A	#N/A	#N/A	#N/A	#N/A	#N/A	#N/A	0	0	0	0	0	0	0	0	0	0	0	0	0	0	0	0	0	1	0	0	0	0	0	0	Bacteria|Firmicutes|Clostridia|Clostridiales|Ruminococcaceae
321768	#N/A	#N/A	#N/A	#N/A	#N/A	#N/A	#N/A	#N/A	#N/A	0	0	0	0	0	0	0	0	0	0	1	0	0	3	0	0	1	0	2	2	0	0	0	0	Bacteria|Firmicutes|Clostridia|Clostridiales
264372	#N/A	#N/A	#N/A	#N/A	#N/A	#N/A	#N/A	#N/A	#N/A	0	0	0	0	0	0	0	1	0	1	0	0	0	0	0	0	0	0	0	0	0	0	0	0	Bacteria|Firmicutes|Clostridia|Clostridiales
347553	#N/A	#N/A	#N/A	#N/A	#N/A	#N/A	#N/A	#N/A	#N/A	0	1	0	0	2	0	0	0	0	0	0	1	0	0	0	0	0	0	0	0	0	0	0	0	Bacteria|Firmicutes|Clostridia|Clostridiales|Peptostreptococcaceae|Clostridium|ruminantium
291750	#N/A	#N/A	#N/A	#N/A	#N/A	#N/A	#N/A	#N/A	#N/A	0	0	0	0	0	0	0	0	0	0	0	0	0	0	0	1	0	0	0	0	0	0	0	0	Bacteria|Firmicutes|Clostridia|Clostridiales
269907	#N/A	#N/A	#N/A	#N/A	#N/A	#N/A	#N/A	#N/A	#N/A	0	0	0	0	0	0	0	0	0	0	0	0	0	0	0	0	0	0	1	0	0	0	0	0	Bacteria|Bacteroidetes|Bacteroidia|Bacteroidales|[Paraprevotellaceae]|[Prevotella]
264155	#N/A	#N/A	#N/A	#N/A	#N/A	#N/A	#N/A	#N/A	#N/A	0	0	0	0	0	8	2	4	0	13	5	0	0	0	10	4	1	3	2	30	1	0	7	0	Bacteria|Firmicutes|Clostridia|Clostridiales
269902	#N/A	#N/A	#N/A	10	0.935414	0	#N/A	#N/A	#N/A	15	17	10	2	5	3	12	7	14	20	20	24	4	15	7	8	26	4	12	22	11	4	8	10	Bacteria|Bacteroidetes|Bacteroidia|Bacteroidales|S24-7
4340153	#N/A	#N/A	#N/A	#N/A	#N/A	#N/A	0	0.295406	0	1	0	1	0	0	0	0	0	0	0	0	0	0	0	0	0	1	1	1	1	0	0	0	0	Bacteria|Firmicutes|Clostridia|Clostridiales|Ruminococcaceae
321019	#N/A	#N/A	#N/A	#N/A	#N/A	#N/A	5	-0.94114	0.5	0	0	0	0	0	0	0	0	0	0	1	0	0	0	0	0	0	0	1	1	4	1	0	2	Bacteria|Firmicutes|Clostridia|Clostridiales|Ruminococcaceae
263687	#N/A	#N/A	#N/A	#N/A	#N/A	#N/A	#N/A	#N/A	#N/A	0	0	0	0	1	0	0	0	0	0	0	0	0	0	0	0	0	0	0	0	0	0	0	0	Bacteria|Firmicutes|Clostridia|Clostridiales|Lachnospiraceae
317073	#N/A	#N/A	#N/A	#N/A	#N/A	#N/A	#N/A	#N/A	#N/A	0	0	0	0	0	1	0	0	0	1	1	0	0	0	0	0	2	0	1	0	0	0	0	0	Bacteria|Firmicutes|Clostridia|Clostridiales|Lachnospiraceae|[Ruminococcus]|gnavus
523140	#N/A	#N/A	#N/A	#N/A	#N/A	#N/A	#N/A	#N/A	#N/A	0	1	0	0	2	0	0	0	0	0	0	0	0	0	0	0	0	0	0	0	0	0	0	0	Bacteria|Firmicutes|Clostridia|Clostridiales|Ruminococcaceae|Ruminococcus
831922	#N/A	#N/A	#N/A	#N/A	#N/A	#N/A	#N/A	#N/A	#N/A	0	0	0	0	0	0	0	50	0	0	0	0	0	61	52	57	0	0	114	0	0	0	0	0	Bacteria|Firmicutes|Clostridia|Clostridiales
349864	#N/A	#N/A	#N/A	#N/A	#N/A	#N/A	#N/A	#N/A	#N/A	0	0	0	0	0	0	0	0	0	0	1	0	0	0	0	0	0	0	0	0	0	0	0	0	Bacteria|Firmicutes|Clostridia|Clostridiales|Lachnospiraceae
658370	36	0	0	4	-0.230429	0	#N/A	#N/A	#N/A	14	14	1	2	28	9	9	20	9	15	2	1	2	31	0	2	10	6	15	6	4	4	36	4	Bacteria|Firmicutes|Clostridia|Clostridiales|Lachnospiraceae
177001	#N/A	#N/A	#N/A	#N/A	#N/A	#N/A	#N/A	#N/A	#N/A	0	1	0	0	0	0	0	0	0	0	0	0	0	0	0	0	0	0	0	0	0	0	0	0	Bacteria|Firmicutes|Clostridia|Clostridiales|Lachnospiraceae
171322	#N/A	#N/A	#N/A	#N/A	#N/A	#N/A	#N/A	#N/A	#N/A	0	0	0	0	0	0	0	0	0	0	0	0	0	0	0	0	0	0	1	0	0	0	0	0	Bacteria|Firmicutes|Clostridia|Clostridiales
295180	#N/A	#N/A	#N/A	22	-0.353553	0	#N/A	#N/A	#N/A	0	0	0	0	3	0	90	0	4	295	0	0	293	23	0	273	0	0	0	0	0	0	0	0	Bacteria|Proteobacteria|Alphaproteobacteria|RF32
588916	#N/A	#N/A	#N/A	#N/A	#N/A	#N/A	#N/A	#N/A	#N/A	0	0	0	0	0	0	0	0	0	0	0	0	0	0	0	0	0	1	0	0	0	0	0	0	Bacteria|Proteobacteria|Gammaproteobacteria|Xanthomonadales|Xanthomonadaceae
268297	#N/A	#N/A	#N/A	#N/A	#N/A	#N/A	#N/A	#N/A	#N/A	0	1	0	0	0	0	0	0	0	0	2	0	0	0	0	0	0	0	1	0	0	0	0	0	Bacteria|Firmicutes|Clostridia|Clostridiales|Lachnospiraceae|[Ruminococcus]|gnavus
352559	#N/A	#N/A	#N/A	#N/A	#N/A	#N/A	#N/A	#N/A	#N/A	0	0	0	0	0	0	0	0	0	0	0	0	0	0	0	0	0	1	0	0	0	0	0	0	Bacteria|Firmicutes|Clostridia|Clostridiales|Lachnospiraceae
339050	#N/A	#N/A	#N/A	#N/A	#N/A	#N/A	#N/A	#N/A	#N/A	0	0	0	0	0	0	1	1	0	0	0	0	0	0	0	1	0	1	0	0	0	0	0	0	Bacteria|Firmicutes|Clostridia|Clostridiales
511510	#N/A	#N/A	#N/A	#N/A	#N/A	#N/A	#N/A	#N/A	#N/A	0	0	0	0	0	0	0	0	0	0	0	0	0	3	0	0	0	0	0	0	0	0	0	0	Bacteria|Firmicutes|Clostridia|Clostridiales
258725	#N/A	#N/A	#N/A	#N/A	#N/A	#N/A	#N/A	#N/A	#N/A	0	0	0	0	0	11	0	1	0	0	0	6	0	0	0	2	0	2	15	17	0	0	0	0	Bacteria|Firmicutes|Clostridia|Clostridiales|Ruminococcaceae|Oscillospira
267073	#N/A	#N/A	#N/A	#N/A	#N/A	#N/A	#N/A	#N/A	#N/A	0	0	0	0	0	0	1	0	0	0	0	0	0	0	0	0	0	0	0	0	1	0	0	0	Bacteria|Firmicutes|Clostridia|Clostridiales|Ruminococcaceae
24546	#N/A	#N/A	#N/A	#N/A	#N/A	#N/A	#N/A	#N/A	#N/A	0	1	0	0	1	0	0	0	0	0	0	0	0	0	0	0	0	0	0	1	0	0	0	0	Bacteria|Firmicutes|Clostridia|Clostridiales|Lachnospiraceae|Dorea
364029	#N/A	#N/A	#N/A	26	1.41421	0	13	-0.125988	0	166	207	224	262	102	233	180	164	630	286	0	366	444	254	200	342	284	251	6	54	130	59	309	151	Bacteria|Bacteroidetes|Bacteroidia|Bacteroidales|Bacteroidaceae|Bacteroides
194665	0	-0.294489	0	#N/A	#N/A	#N/A	12	0.0578315	0.375	4	12	6	1	3	4	9	3	0	7	9	3	0	1	1	0	2	2	2	11	0	11	6	7	Bacteria|Firmicutes|Clostridia|Clostridiales|Ruminococcaceae|Oscillospira
194662	#N/A	#N/A	#N/A	#N/A	#N/A	#N/A	#N/A	#N/A	#N/A	0	0	0	0	0	0	0	1	0	0	0	0	0	0	0	0	0	0	0	0	0	1	0	0	Bacteria|Firmicutes|Clostridia|Clostridiales
186707	#N/A	#N/A	#N/A	#N/A	#N/A	#N/A	#N/A	#N/A	#N/A	0	0	0	0	0	0	0	0	0	0	0	0	0	0	0	0	0	0	0	0	0	0	1	0	Bacteria|Firmicutes|Clostridia|Clostridiales
185126	#N/A	#N/A	#N/A	#N/A	#N/A	#N/A	#N/A	#N/A	#N/A	0	0	1	1	0	0	0	1	0	0	0	0	0	0	0	0	1	0	0	0	0	0	0	0	Bacteria|Firmicutes|Clostridia|Clostridiales
287953	#N/A	#N/A	#N/A	#N/A	#N/A	#N/A	#N/A	#N/A	#N/A	0	1	0	0	0	0	0	0	0	0	0	0	0	0	0	0	0	0	0	0	0	0	1	0	Bacteria|Firmicutes|Clostridia|Clostridiales|Lachnospiraceae|Butyrivibrio
262935	1	0.195805	0	2	1.07349	0	2	-0.747553	0.444444	1	14	7	3	24	22	15	19	2	5	27	3	12	17	22	16	15	18	49	66	69	10	14	48	Bacteria|Firmicutes|Clostridia|Clostridiales
311482	#N/A	#N/A	#N/A	#N/A	#N/A	#N/A	17	-0.361158	0	0	0	0	2	3	0	0	0	0	0	2	0	0	0	0	0	0	2	2	4	1	1	1	0	Bacteria|Bacteroidetes|Bacteroidia|Bacteroidales|Bacteroidaceae|Bacteroides|acidifaciens
198494	#N/A	#N/A	#N/A	#N/A	#N/A	#N/A	#N/A	#N/A	#N/A	0	0	0	0	0	0	0	0	0	0	0	0	0	0	0	0	0	0	0	0	0	1	0	0	Bacteria|Firmicutes|Clostridia|Clostridiales|Lachnospiraceae|Roseburia
263350	10	-0.781736	0	1	-0.237775	0	#N/A	#N/A	#N/A	2	3	2	1	0	1	1	0	0	0	2	2	5	1	1	1	1	0	2	2	2	0	1	1	Bacteria|Bacteroidetes|Bacteroidia|Bacteroidales|S24-7
268475	#N/A	#N/A	#N/A	#N/A	#N/A	#N/A	#N/A	#N/A	#N/A	0	1	1	0	1	0	0	0	0	0	0	0	1	1	0	0	0	0	0	0	0	0	0	0	Bacteria|Firmicutes|Clostridia|Clostridiales|Ruminococcaceae|Oscillospira
264795	0	-0.294489	0	13	1.83712	0	#N/A	#N/A	#N/A	5	0	0	0	0	1	2	3	1	1	0	2	0	1	0	0	5	0	7	0	0	3	0	0	Bacteria|Firmicutes|Erysipelotrichi|Erysipelotrichales|Erysipelotrichaceae|Allobaculum
2897332	#N/A	#N/A	#N/A	#N/A	#N/A	#N/A	#N/A	#N/A	#N/A	0	0	0	0	0	0	0	0	0	0	1	0	0	0	0	0	0	0	0	0	0	0	0	0	Bacteria|Firmicutes|Clostridia|Clostridiales|Lachnospiraceae|[Ruminococcus]|gnavus
229449	#N/A	#N/A	#N/A	#N/A	#N/A	#N/A	#N/A	#N/A	#N/A	0	0	0	0	6	1	9	0	0	0	0	1	0	1	2	0	0	0	1	0	0	8	2	0	Bacteria|Firmicutes|Clostridia|Clostridiales
273737	#N/A	#N/A	#N/A	20	1	0	0	1.46419	0	30	3	1	23	0	58	6	148	4	10	19	22	0	107	43	25	46	66	121	123	0	22	21	19	Bacteria|Firmicutes|Clostridia|Clostridiales|Ruminococcaceae
171617	#N/A	#N/A	#N/A	#N/A	#N/A	#N/A	#N/A	#N/A	#N/A	0	0	0	0	0	0	0	0	0	0	0	0	0	0	0	0	0	0	1	0	0	0	0	0	Bacteria|Bacteroidetes|Bacteroidia|Bacteroidales|S24-7
183496	#N/A	#N/A	#N/A	41	0	0	7	-1.016	0	0	0	0	0	1	0	1	0	0	2	0	2	0	1	1	1	1	0	2	0	0	1	2	0	Bacteria|Bacteroidetes|Bacteroidia|Bacteroidales|Bacteroidaceae|Bacteroides
322062	12	-1.15204	0	9	-0.111675	0	8	0.408248	0	103	203	218	36	117	109	164	103	16	158	454	179	111	87	123	56	254	169	229	60	92	73	215	139	Bacteria|Firmicutes|Clostridia|Clostridiales|Lachnospiraceae
178491	2	0.0976565	0	24	-0.544331	0	3	-0.993848	0	62	211	89	142	25	1021	0	175	19	361	254	69	246	61	25	239	0	3	1117	267	108	53	0	98	Bacteria|Proteobacteria|Alphaproteobacteria|RF32
330333	#N/A	#N/A	#N/A	#N/A	#N/A	#N/A	26	0	0	4	9	13	38	41	324	24	35	5	18	33	236	176	146	36	43	100	157	9	2287	869	23	17	24	Bacteria|Firmicutes|Clostridia|Clostridiales|Ruminococcaceae|Oscillospira
378273	2	-0.44643	0	15	-0.894427	0	#N/A	#N/A	#N/A	52	83	14	146	36	183	0	548	2	82	369	211	80	376	95	60	150	378	607	623	98	204	65	40	Bacteria|Firmicutes|Clostridia|Clostridiales
1105687	44	0	0	#N/A	#N/A	#N/A	2	-0.0692178	0.375	7	3	2	4	3	1	3	1	5	9	5	4	6	4	6	1	15	10	14	3	5	1	10	1	Bacteria|Firmicutes|Clostridia|Clostridiales|Ruminococcaceae|Oscillospira
263535	#N/A	#N/A	#N/A	#N/A	#N/A	#N/A	#N/A	#N/A	#N/A	0	0	0	0	0	0	0	0	0	0	0	0	0	1	0	1	0	0	0	0	0	0	1	0	Bacteria|Firmicutes|Clostridia|Clostridiales
335330	#N/A	#N/A	#N/A	#N/A	#N/A	#N/A	19	0.337526	0	0	1	2	0	0	0	0	3	0	1	0	2	0	0	1	0	0	2	3	0	0	1	1	0	Bacteria|Firmicutes|Clostridia|Clostridiales|Ruminococcaceae|Oscillospira
1571092	#N/A	#N/A	#N/A	#N/A	#N/A	#N/A	#N/A	#N/A	#N/A	0	0	0	0	0	0	0	0	0	0	0	0	0	0	2	0	0	0	0	0	0	0	0	0	Bacteria|Firmicutes|Clostridia|Clostridiales
267457	#N/A	#N/A	#N/A	#N/A	#N/A	#N/A	#N/A	#N/A	#N/A	0	0	0	0	0	0	0	0	0	0	0	1	1	0	0	0	0	0	0	0	0	0	0	0	Bacteria|Firmicutes|Clostridia|Clostridiales
1094991	#N/A	#N/A	#N/A	#N/A	#N/A	#N/A	19	-0.90007	0.32	0	1	0	0	0	0	1	0	0	0	2	0	1	2	0	0	0	2	1	0	0	2	3	0	Bacteria|Firmicutes|Clostridia|Clostridiales|Ruminococcaceae
267451	#N/A	#N/A	#N/A	#N/A	#N/A	#N/A	0	-0.372469	0	0	0	1	0	0	0	0	12	0	0	0	0	0	0	30	37	29	2	50	112	0	0	0	0	Bacteria|Firmicutes|Clostridia|Clostridiales|Ruminococcaceae
953855	#N/A	#N/A	#N/A	#N/A	#N/A	#N/A	#N/A	#N/A	#N/A	0	0	0	1	0	0	0	1	0	0	1	0	0	0	0	0	0	0	2	0	1	0	0	0	Bacteria|Bacteroidetes|Bacteroidia|Bacteroidales|Rikenellaceae
259293	#N/A	#N/A	#N/A	#N/A	#N/A	#N/A	#N/A	#N/A	#N/A	0	0	0	0	0	0	0	0	0	0	0	0	0	0	0	0	0	1	0	0	0	0	0	0	Bacteria|Bacteroidetes|Bacteroidia|Bacteroidales|S24-7
641490	#N/A	#N/A	#N/A	#N/A	#N/A	#N/A	#N/A	#N/A	#N/A	0	0	0	0	0	0	0	0	0	0	1	0	0	0	0	0	0	0	0	0	0	0	0	0	Bacteria|Firmicutes|Bacilli|Lactobacillales|Enterococcaceae|Enterococcus
319214	#N/A	#N/A	#N/A	#N/A	#N/A	#N/A	#N/A	#N/A	#N/A	0	0	1	0	0	0	0	0	0	0	3	0	0	0	0	0	0	0	0	0	0	0	0	0	Bacteria|Firmicutes|Clostridia|Clostridiales|Lachnospiraceae|[Ruminococcus]|gnavus
4345850	#N/A	#N/A	#N/A	#N/A	#N/A	#N/A	#N/A	#N/A	#N/A	0	0	0	0	0	0	0	0	0	0	0	1	0	0	0	0	0	0	0	0	0	0	0	0	Bacteria|Bacteroidetes|Bacteroidia|Bacteroidales|Bacteroidaceae|Bacteroides
308598	18	0.302532	0	40	0	0	5	0.0723954	0	6	7	5	8	7	5	2	0	0	1	0	4	1	5	1	2	1	5	7	8	1	6	0	2	Bacteria|Bacteroidetes|Bacteroidia|Bacteroidales|Bacteroidaceae|Bacteroides|ovatus
588216	#N/A	#N/A	#N/A	#N/A	#N/A	#N/A	#N/A	#N/A	#N/A	0	0	0	0	0	0	0	0	1	0	0	0	0	0	0	1	0	0	1	0	0	0	0	0	Bacteria|Proteobacteria|Gammaproteobacteria|Enterobacteriales|Enterobacteriaceae
114510	#N/A	#N/A	#N/A	#N/A	#N/A	#N/A	#N/A	#N/A	#N/A	0	0	1	0	0	0	0	0	0	0	0	0	0	0	0	0	2	0	0	0	0	0	0	0	Bacteria|Proteobacteria|Gammaproteobacteria|Enterobacteriales|Enterobacteriaceae|Escherichia|coli
187272	#N/A	#N/A	#N/A	#N/A	#N/A	#N/A	#N/A	#N/A	#N/A	0	0	0	0	0	0	0	0	0	0	0	0	0	0	0	0	1	0	0	0	0	0	0	0	Bacteria|Firmicutes|Clostridia|Clostridiales|Ruminococcaceae
266583	8	-1.03078	0	#N/A	#N/A	#N/A	#N/A	#N/A	#N/A	0	1	0	0	0	3	1	4	0	0	1	2	0	0	0	0	0	0	2	1	0	1	0	0	Bacteria|Firmicutes|Clostridia|Clostridiales|Lachnospiraceae
322118	#N/A	#N/A	#N/A	19	-0.5	0	2	-0.747553	0	0	2	0	1	4	0	0	0	0	3	0	1	6	0	1	0	1	3	3	1	1	0	2	0	Bacteria|Firmicutes|Clostridia|Clostridiales|Peptostreptococcaceae
180555	8	0	0	#N/A	#N/A	#N/A	#N/A	#N/A	#N/A	1	1	0	0	0	2	0	1	1	0	0	0	0	0	0	0	0	0	1	0	0	0	1	0	Bacteria|Firmicutes|Clostridia|Clostridiales|Lachnospiraceae|Coprococcus
377946	#N/A	#N/A	#N/A	#N/A	#N/A	#N/A	#N/A	#N/A	#N/A	266	704	105	76	1128	298	1043	246	21	557	483	464	85	29	7	113	146	21	191	45	138	170	464	37	Bacteria|Firmicutes|Clostridia|Clostridiales
177271	#N/A	#N/A	#N/A	#N/A	#N/A	#N/A	#N/A	#N/A	#N/A	0	1	0	0	0	0	0	0	0	0	0	0	0	0	0	0	0	0	1	0	0	0	1	0	Bacteria|Firmicutes|Clostridia|Clostridiales|Ruminococcaceae|Ruminococcus
441494	#N/A	#N/A	#N/A	#N/A	#N/A	#N/A	#N/A	#N/A	#N/A	0	0	0	0	0	433	493	0	0	0	0	0	0	0	1	1	0	0	0	0	0	1	0	0	Bacteria|Firmicutes|Clostridia|Clostridiales|Ruminococcaceae
322112	#N/A	#N/A	#N/A	#N/A	#N/A	#N/A	#N/A	#N/A	#N/A	1	0	0	0	0	0	0	0	0	0	2	0	0	0	1	0	0	0	0	0	0	0	0	1	Bacteria|Firmicutes|Clostridia|Clostridiales|Lachnospiraceae|[Ruminococcus]|gnavus
4354229	#N/A	#N/A	#N/A	#N/A	#N/A	#N/A	#N/A	#N/A	#N/A	0	0	0	0	0	0	0	0	0	0	0	0	1	0	0	0	0	0	0	0	0	0	0	0	Bacteria|Bacteroidetes|Bacteroidia|Bacteroidales|Bacteroidaceae|Bacteroides
277388	#N/A	#N/A	#N/A	#N/A	#N/A	#N/A	#N/A	#N/A	#N/A	0	0	0	0	0	0	0	0	0	0	0	0	1	0	0	0	0	0	0	0	0	0	0	0	Bacteria|Firmicutes|Clostridia|Clostridiales|Ruminococcaceae|Oscillospira
807795	#N/A	#N/A	#N/A	#N/A	#N/A	#N/A	#N/A	#N/A	#N/A	0	0	0	0	0	1	0	0	0	0	2	0	0	2	0	0	1	1	0	0	1	0	0	0	Bacteria|Firmicutes|Bacilli|Lactobacillales|Lactobacillaceae|Lactobacillus
189384	#N/A	#N/A	#N/A	#N/A	#N/A	#N/A	4	2.10888	0	0	1	1	0	0	3	0	0	9	0	0	0	0	0	1	2	4	2	0	0	2	0	2	2	Bacteria|Bacteroidetes|Bacteroidia|Bacteroidales|Bacteroidaceae|Bacteroides
189387	#N/A	#N/A	#N/A	#N/A	#N/A	#N/A	#N/A	#N/A	#N/A	0	0	0	0	0	0	0	0	0	0	1	0	0	0	0	0	0	0	0	0	0	0	0	1	Bacteria|Firmicutes|Clostridia|Clostridiales|Ruminococcaceae
319455	#N/A	#N/A	#N/A	#N/A	#N/A	#N/A	#N/A	#N/A	#N/A	1	0	0	0	0	0	1	0	0	5	4	0	0	2	0	0	0	0	0	0	0	0	0	1	Bacteria|Firmicutes|Clostridia|Clostridiales|Christensenellaceae
304779	#N/A	#N/A	#N/A	#N/A	#N/A	#N/A	#N/A	#N/A	#N/A	0	0	0	1	0	0	0	0	0	0	0	0	0	0	0	0	0	0	0	0	0	0	0	0	Bacteria|Firmicutes|Clostridia|Clostridiales|Clostridiaceae|Clostridium|perfringens
198964	#N/A	#N/A	#N/A	#N/A	#N/A	#N/A	#N/A	#N/A	#N/A	0	0	0	0	0	0	0	0	0	0	0	0	0	6	0	0	0	0	0	1	0	0	0	0	Bacteria|Bacteroidetes|Bacteroidia|Bacteroidales|S24-7
304777	#N/A	#N/A	#N/A	#N/A	#N/A	#N/A	#N/A	#N/A	#N/A	0	0	0	0	0	0	0	0	0	0	1	0	0	0	0	0	0	0	0	0	0	0	0	0	Bacteria|Firmicutes|Clostridia|Clostridiales|Ruminococcaceae|Oscillospira
843459	#N/A	#N/A	#N/A	#N/A	#N/A	#N/A	#N/A	#N/A	#N/A	0	0	0	1	0	0	0	0	0	0	0	0	0	0	0	0	0	0	0	0	0	0	0	0	Bacteria|Firmicutes|Clostridia|Clostridiales|Clostridiaceae
4380137	#N/A	#N/A	#N/A	#N/A	#N/A	#N/A	#N/A	#N/A	#N/A	0	0	0	0	0	0	0	0	0	0	0	0	0	0	1	0	0	0	0	0	0	0	0	0	Bacteria|Firmicutes|Clostridia|Clostridiales|Peptostreptococcaceae
276386	43	0	0	0	0.136083	0	12	0.636146	0	1	8	5	1	0	2	3	0	0	3	4	3	1	0	1	0	0	1	0	7	0	6	5	7	Bacteria|Firmicutes|Clostridia|Clostridiales|Ruminococcaceae|Oscillospira
273043	#N/A	#N/A	#N/A	0	1.49691	0	3	0.564076	0	0	1	1	0	0	0	0	1	0	1	3	1	0	0	2	3	2	0	0	1	0	0	1	1	Bacteria|Firmicutes|Clostridia|Clostridiales
263828	#N/A	#N/A	#N/A	#N/A	#N/A	#N/A	#N/A	#N/A	#N/A	0	0	0	0	0	0	0	0	0	0	0	0	0	1	0	0	0	0	0	0	0	0	0	1	Bacteria|Firmicutes|Clostridia|Clostridiales|Lachnospiraceae
767863	#N/A	#N/A	#N/A	#N/A	#N/A	#N/A	#N/A	#N/A	#N/A	0	1	0	0	0	0	0	0	0	0	0	0	0	0	0	0	0	0	0	0	0	0	0	0	Bacteria|Firmicutes|Bacilli|Lactobacillales|Enterococcaceae
543942	#N/A	#N/A	#N/A	#N/A	#N/A	#N/A	#N/A	#N/A	#N/A	0	0	0	0	0	1	0	0	0	0	0	0	0	0	0	0	0	1	0	0	0	0	4	0	Bacteria|Proteobacteria|Gammaproteobacteria|Pseudomonadales|Moraxellaceae|Acinetobacter
4043275	#N/A	#N/A	#N/A	#N/A	#N/A	#N/A	#N/A	#N/A	#N/A	0	0	0	1	0	0	0	0	0	0	0	0	0	0	0	0	0	0	0	0	0	0	0	0	Bacteria|Firmicutes|Clostridia|Clostridiales|Clostridiaceae
468313	12	-1.15204	0	9	-0.352207	0	19	-2.13767	0	2	935	0	2	39	1	24	0	0	0	571	1055	1624	1760	0	0	0	4	1	268	0	23	1	266	Bacteria|Firmicutes|Clostridia|Clostridiales|Lachnospiraceae
177352	#N/A	#N/A	#N/A	#N/A	#N/A	#N/A	#N/A	#N/A	#N/A	0	0	0	0	0	0	0	0	0	0	0	0	0	0	0	0	1	0	0	0	0	0	0	0	Bacteria|Firmicutes|Clostridia|Clostridiales
315491	#N/A	#N/A	#N/A	#N/A	#N/A	#N/A	#N/A	#N/A	#N/A	0	0	0	0	0	0	0	1	0	0	0	0	0	0	1	1	0	0	4	0	0	0	1	0	Bacteria|Firmicutes|Clostridia|Clostridiales
302433	#N/A	#N/A	#N/A	9	-0.352207	0	5	-0.434372	0	122	18	43	28	15	11	16	23	0	35	13	53	23	189	43	3	1	22	26	36	0	5	44	36	Bacteria|Firmicutes|Clostridia|Clostridiales|[Mogibacteriaceae]
662974	#N/A	#N/A	#N/A	#N/A	#N/A	#N/A	21	0.235702	0	0	0	0	0	0	0	0	0	0	0	1	0	0	1	1	0	0	1	4	1	0	0	1	0	Bacteria|Actinobacteria|Actinobacteria|Bifidobacteriales|Bifidobacteriaceae
341713	#N/A	#N/A	#N/A	9	-0.833271	0	6	-0.410152	0.444444	0	0	0	2	0	5	0	0	0	1	0	0	4	1	5	1	1	4	3	3	0	1	1	3	Bacteria|Firmicutes|Clostridia|Clostridiales|Ruminococcaceae
259275	2	0.641742	0	37	0	0	5	-0.434372	0	1	4	2	1	3	2	0	1	1	5	7	2	1	4	7	4	1	1	3	3	0	3	1	6	Bacteria|Firmicutes|Clostridia|Clostridiales|Ruminococcaceae
346804	#N/A	#N/A	#N/A	9	0.128856	0	21	-1.17851	0	9	83	50	18	29	27	59	73	5	51	88	35	28	18	33	15	27	49	55	44	29	38	72	13	Bacteria|Firmicutes|Clostridia|Clostridiales|Ruminococcaceae
182420	0	0.278128	0	#N/A	#N/A	#N/A	12	0.636146	0.32	0	2	3	2	0	0	5	0	0	0	4	0	0	0	1	0	0	0	0	1	0	5	8	3	Bacteria|Firmicutes|Clostridia|Clostridiales|Ruminococcaceae|Oscillospira
250148	#N/A	#N/A	#N/A	#N/A	#N/A	#N/A	#N/A	#N/A	#N/A	0	0	0	0	0	0	0	1	0	0	0	0	0	0	0	0	0	0	0	0	0	0	0	0	Bacteria|Actinobacteria|Actinobacteria|Actinomycetales|Kineosporiaceae
1808430	#N/A	#N/A	#N/A	#N/A	#N/A	#N/A	#N/A	#N/A	#N/A	0	0	0	1	0	0	0	0	0	0	0	0	0	0	0	0	0	0	0	0	0	0	0	0	Bacteria|Firmicutes|Clostridia|Clostridiales|Peptococcaceae|Pelotomaculum
182033	2	0.0976565	0.375	#N/A	#N/A	#N/A	33	0	0	0	1	0	0	1	1	0	1	1	0	0	0	0	0	0	0	4	0	1	0	2	0	1	2	Bacteria|Firmicutes|Clostridia|Clostridiales|Ruminococcaceae|Oscillospira
270385	#N/A	#N/A	#N/A	#N/A	#N/A	#N/A	#N/A	#N/A	#N/A	0	0	0	0	1	1	3	0	0	1	1	0	0	0	0	1	0	0	0	1	0	1	0	2	Bacteria|Firmicutes|Clostridia|Clostridiales|Ruminococcaceae|Oscillospira
539820	#N/A	#N/A	#N/A	#N/A	#N/A	#N/A	4	1.48703	0.277778	0	1	0	0	0	0	0	0	0	0	1	0	1	0	0	0	0	1	0	0	1	0	1	1	Bacteria|Firmicutes|Clostridia|Clostridiales|Ruminococcaceae|Oscillospira
270382	40	0	0	#N/A	#N/A	#N/A	#N/A	#N/A	#N/A	0	2	1	1	1	2	1	0	0	0	0	1	5	0	2	0	0	0	2	0	0	0	0	0	Bacteria|Firmicutes|Clostridia|Clostridiales|Clostridiaceae
513445	20	-0.308607	0	6	1.64157	0	3	1.34304	0	20428	31611	32424	40383	15980	28923	29256	27290	14778	45842	32	59603	61667	38533	21879	25602	27570	19972	141	6738	6020	7017	46271	11775	Bacteria|Bacteroidetes|Bacteroidia|Bacteroidales|Bacteroidaceae|Bacteroides
329741	12	0.164577	0	#N/A	#N/A	#N/A	22	-2.10042	0	1	195	578	1	0	8	0	1	1	929	2	0	30	658	22	2	4	0	1	1228	116	0	483	5	Bacteria|Firmicutes|Clostridia|Clostridiales
513440	#N/A	#N/A	#N/A	#N/A	#N/A	#N/A	#N/A	#N/A	#N/A	0	0	0	0	0	0	0	0	0	0	1	0	0	0	0	0	0	0	0	0	0	0	0	0	Bacteria|Firmicutes|Clostridia|Clostridiales|Lachnospiraceae
321972	2	-0.990516	0	#N/A	#N/A	#N/A	6	0.729158	0	37	19	10	24	21	16	10	6	6	13	14	10	6	12	25	20	10	31	38	27	16	26	6	13	Bacteria|Bacteroidetes|Bacteroidia|Bacteroidales|Bacteroidaceae|Bacteroides|acidifaciens
330921	#N/A	#N/A	#N/A	#N/A	#N/A	#N/A	#N/A	#N/A	#N/A	0	1	0	0	0	0	0	0	0	0	0	0	0	0	0	0	0	0	0	0	0	0	1	0	Bacteria|Firmicutes|Clostridia|Clostridiales
795046	#N/A	#N/A	#N/A	#N/A	#N/A	#N/A	#N/A	#N/A	#N/A	2	0	0	0	0	0	0	0	0	0	0	3	0	3	0	0	0	0	2	3	0	0	0	0	Bacteria|Firmicutes|Clostridia|Clostridiales|Lachnospiraceae
342075	4	-1.12767	0	3	-0.475971	0	17	-0.361158	0.444444	2	5	3	0	11	3	5	0	0	2	2	2	9	3	0	1	1	1	0	0	0	4	2	1	Bacteria|Firmicutes|Clostridia|Clostridiales
98332	#N/A	#N/A	#N/A	#N/A	#N/A	#N/A	#N/A	#N/A	#N/A	0	0	0	0	1	0	0	0	0	0	0	0	0	0	0	0	0	0	0	0	1	0	0	0	Bacteria|Firmicutes|Clostridia|Clostridiales|Ruminococcaceae|Oscillospira
4460560	#N/A	#N/A	#N/A	#N/A	#N/A	#N/A	#N/A	#N/A	#N/A	0	0	0	0	0	1	0	0	1	0	0	0	0	0	0	0	0	0	0	0	0	0	0	0	Bacteria|Firmicutes|Clostridia|Clostridiales|Ruminococcaceae|Ruminococcus
268971	35	0	0	#N/A	#N/A	#N/A	17	-1.14367	0	0	7	1	4	3	0	0	4	0	1	7	1	1	0	2	3	4	6	1	0	1	8	3	5	Bacteria|Firmicutes|Clostridia|Clostridiales|Ruminococcaceae|Ruminococcus
4449456	#N/A	#N/A	#N/A	#N/A	#N/A	#N/A	#N/A	#N/A	#N/A	0	0	0	0	0	0	0	0	0	0	0	0	0	0	0	0	0	1	0	0	0	0	0	0	Bacteria|Proteobacteria|Gammaproteobacteria|Pseudomonadales|Moraxellaceae|Acinetobacter|guillouiae
173807	3	-0.354246	0	9	2.29364	0.124444	46	0	0	11	27	42	28	33	0	38	9	4	14	15	17	13	13	13	9	5	22	14	15	36	34	10	19	Bacteria|Bacteroidetes|Bacteroidia|Bacteroidales|[Paraprevotellaceae]|[Prevotella]
323154	#N/A	#N/A	#N/A	#N/A	#N/A	#N/A	#N/A	#N/A	#N/A	0	0	0	0	0	0	1	0	0	0	1	1	0	0	0	0	1	0	0	0	0	0	0	0	Bacteria|Firmicutes|Clostridia|Clostridiales|Lachnospiraceae
389529	0	-0.867106	0	#N/A	#N/A	#N/A	1	0.182956	0	1	1	3	0	0	1	2	3	0	0	0	0	1	0	2	0	1	3	1	1	0	2	1	0	Bacteria|Firmicutes|Clostridia|Clostridiales|Ruminococcaceae
323403	#N/A	#N/A	#N/A	#N/A	#N/A	#N/A	#N/A	#N/A	#N/A	4	0	0	3	0	2	0	0	5	0	0	0	0	0	12	14	4	0	18	1	0	0	0	0	Bacteria|Firmicutes|Clostridia|Clostridiales|Ruminococcaceae|Oscillospira
162576	#N/A	#N/A	#N/A	#N/A	#N/A	#N/A	#N/A	#N/A	#N/A	0	0	0	0	2	1	1	0	0	0	0	0	0	0	0	0	0	0	0	0	0	0	1	0	Bacteria|Firmicutes|Clostridia|Clostridiales
197463	#N/A	#N/A	#N/A	#N/A	#N/A	#N/A	#N/A	#N/A	#N/A	0	0	0	0	0	1	0	0	0	0	0	0	0	0	0	0	0	1	6	1	0	0	0	0	Bacteria|Firmicutes|Clostridia|Clostridiales|Ruminococcaceae|Oscillospira
135956	#N/A	#N/A	#N/A	#N/A	#N/A	#N/A	#N/A	#N/A	#N/A	0	0	0	0	0	0	0	0	0	0	0	0	0	0	0	0	0	0	0	0	0	0	0	1	Bacteria|Firmicutes|Bacilli|Lactobacillales|Lactobacillaceae|Lactobacillus
343251	#N/A	#N/A	#N/A	#N/A	#N/A	#N/A	#N/A	#N/A	#N/A	0	0	0	0	0	0	0	0	0	1	0	0	0	0	0	0	0	0	0	0	0	0	0	0	Bacteria|Firmicutes|Clostridia|Clostridiales
265563	#N/A	#N/A	#N/A	#N/A	#N/A	#N/A	#N/A	#N/A	#N/A	0	1	0	0	0	0	0	0	0	0	0	0	0	0	0	0	0	0	0	0	0	1	1	0	Bacteria|Firmicutes|Clostridia|Clostridiales|Lachnospiraceae|Dorea
321484	12	0.4279	0	#N/A	#N/A	#N/A	22	1.26025	0.277778	1	0	0	4	0	2	0	3	0	1	3	2	0	10	6	0	8	1	14	3	0	2	1	0	Bacteria|Firmicutes|Clostridia|Clostridiales|Ruminococcaceae|Oscillospira
270094	18	-0.756329	0	8	-0.78039	0	4	1.48703	0	2	3	3	1	1	5	2	0	0	1	0	4	6	1	1	4	2	1	0	0	1	0	3	1	Bacteria|Bacteroidetes|Bacteroidia|Bacteroidales|Bacteroidaceae|Bacteroides
355045	#N/A	#N/A	#N/A	#N/A	#N/A	#N/A	#N/A	#N/A	#N/A	24	24	24	12	15	25	41	68	9	52	33	20	123	24	32	71	37	26	49	56	41	45	64	25	Bacteria|Bacteroidetes|Bacteroidia|Bacteroidales|S24-7
261315	12	-0.625393	0.56	#N/A	#N/A	#N/A	#N/A	#N/A	#N/A	2	1	1	0	1	0	1	2	0	1	1	0	0	0	0	1	0	0	0	0	0	1	0	0	Bacteria|Firmicutes|Clostridia|Clostridiales
176455	#N/A	#N/A	#N/A	2	2.24457	0.21875	7	0.508001	0	10	25	36	9	21	0	40	9	2	15	21	10	11	11	8	12	3	18	30	12	39	30	9	24	Bacteria|Bacteroidetes|Bacteroidia|Bacteroidales|[Paraprevotellaceae]|[Prevotella]
466409	#N/A	#N/A	#N/A	#N/A	#N/A	#N/A	#N/A	#N/A	#N/A	0	0	1	4	1	0	0	0	0	2	1	0	0	0	0	0	1	0	0	0	0	0	5	0	Bacteria|Firmicutes|Clostridia|Clostridiales
274289	#N/A	#N/A	#N/A	#N/A	#N/A	#N/A	#N/A	#N/A	#N/A	0	0	0	0	0	0	0	0	0	0	0	0	1	0	0	0	0	0	0	0	0	0	0	0	Bacteria|Firmicutes|Clostridia|Clostridiales
3919797	#N/A	#N/A	#N/A	#N/A	#N/A	#N/A	#N/A	#N/A	#N/A	0	0	0	0	1	0	0	0	0	0	0	0	0	0	0	0	0	0	0	0	0	0	0	0	Bacteria|Firmicutes|Clostridia|Clostridiales
198774	#N/A	#N/A	#N/A	#N/A	#N/A	#N/A	#N/A	#N/A	#N/A	0	0	0	0	0	0	1	0	0	0	0	0	0	0	0	0	0	0	0	0	0	0	0	0	Bacteria|Actinobacteria|Coriobacteriia|Coriobacteriales|Coriobacteriaceae|Adlercreutzia
513685	#N/A	#N/A	#N/A	#N/A	#N/A	#N/A	11	2.23333	0	0	0	0	0	108	0	0	0	0	0	33	0	0	0	0	0	0	0	203	2	0	0	116	64	Bacteria|Firmicutes|Clostridia|Clostridiales|Ruminococcaceae
198194	#N/A	#N/A	#N/A	21	0.144338	0	#N/A	#N/A	#N/A	0	1	0	0	0	0	1	0	0	0	3	1	0	1	1	0	0	0	0	0	0	1	1	0	Bacteria|Firmicutes|Clostridia|Clostridiales|Ruminococcaceae|Oscillospira
198190	41	0	0	#N/A	#N/A	#N/A	17	-1.14367	0	453	709	206	1498	917	1005	8035	452	59	239	39	204	1049	279	750	468	134	1263	856	825	989	961	259	112	Bacteria|Bacteroidetes|Bacteroidia|Bacteroidales|Porphyromonadaceae|Parabacteroides|distasonis
1129971	#N/A	#N/A	#N/A	#N/A	#N/A	#N/A	#N/A	#N/A	#N/A	0	1	0	0	0	0	1	0	0	3	0	1	0	0	0	0	2	0	1	0	0	0	1	0	Bacteria|Firmicutes|Clostridia|Clostridiales
827195	23	0.0496292	0.375	9	-0.592739	0	8	-0.408248	0	0	14	107	49	28	48	0	61	0	105	6	76	120	23	28	53	0	26	38	0	32	88	53	0	Bacteria|Firmicutes|Clostridia|Clostridiales
194048	#N/A	#N/A	#N/A	#N/A	#N/A	#N/A	#N/A	#N/A	#N/A	0	0	0	0	0	0	0	0	0	0	0	0	1	0	0	0	0	0	0	0	0	0	0	0	Bacteria|Bacteroidetes|Bacteroidia|Bacteroidales|S24-7
176230	#N/A	#N/A	#N/A	#N/A	#N/A	#N/A	#N/A	#N/A	#N/A	0	0	1	0	0	0	0	0	0	0	0	0	0	0	0	0	0	0	0	0	1	0	0	0	Bacteria|Bacteroidetes|Bacteroidia|Bacteroidales|Bacteroidaceae|Bacteroides
332168	12	1.21787	0.165289	#N/A	#N/A	#N/A	21	1.64992	0	0	1	2	0	1	0	3	0	0	1	1	0	0	1	0	0	2	0	0	0	2	1	0	1	Bacteria|Firmicutes|Clostridia|Clostridiales|Lachnospiraceae
320373	16	-0.267261	0	#N/A	#N/A	#N/A	#N/A	#N/A	#N/A	0	1	0	0	1	1	1	2	0	1	2	0	0	0	1	0	0	1	2	0	0	3	0	0	Bacteria|Firmicutes|Clostridia|Clostridiales|Lachnospiraceae|[Ruminococcus]|gnavus
275881	#N/A	#N/A	#N/A	#N/A	#N/A	#N/A	#N/A	#N/A	#N/A	0	0	1	0	0	1	0	0	0	0	0	0	0	0	0	0	0	1	0	0	0	0	0	0	Bacteria|Firmicutes|Clostridia|Clostridiales
2545906	#N/A	#N/A	#N/A	#N/A	#N/A	#N/A	#N/A	#N/A	#N/A	0	0	0	0	0	0	2	0	0	0	0	0	0	0	0	0	0	1	0	0	1	0	0	0	Bacteria|Bacteroidetes|Bacteroidia|Bacteroidales|Porphyromonadaceae|Parabacteroides|distasonis
179513	#N/A	#N/A	#N/A	#N/A	#N/A	#N/A	#N/A	#N/A	#N/A	0	0	0	0	0	0	0	0	0	0	0	0	0	0	0	0	0	0	6	0	0	0	0	2	Bacteria|Bacteroidetes|Bacteroidia|Bacteroidales|S24-7
269911	#N/A	#N/A	#N/A	7	0.8125	0	21	-1.17851	0	1	1	0	0	0	0	0	0	0	0	2	1	1	1	1	0	0	2	5	4	0	1	1	0	Bacteria|Firmicutes|Clostridia|Clostridiales
265940	9	1.83316	0	27	0	0	44	0	0	0	6	0	3	1	1	1	4	0	1	2	2	0	2	0	3	1	3	3	0	1	3	0	2	Bacteria|Firmicutes|Clostridia|Clostridiales|Ruminococcaceae|Ruminococcus
4194837	#N/A	#N/A	#N/A	#N/A	#N/A	#N/A	#N/A	#N/A	#N/A	0	0	1	0	0	0	0	0	0	0	0	1	0	0	0	0	0	0	0	0	0	0	0	0	Bacteria|Firmicutes|Clostridia|Clostridiales|Lachnospiraceae|Coprococcus
1992	#N/A	#N/A	#N/A	#N/A	#N/A	#N/A	#N/A	#N/A	#N/A	0	1	0	0	0	0	0	0	0	0	0	0	0	0	0	0	0	0	0	0	0	0	0	0	Bacteria|Bacteroidetes|Bacteroidia|Bacteroidales|Bacteroidaceae|Bacteroides
274422	#N/A	#N/A	#N/A	#N/A	#N/A	#N/A	#N/A	#N/A	#N/A	0	2	0	0	0	0	0	0	0	2	0	1	0	0	0	0	0	0	2	2	0	0	1	0	Bacteria|Firmicutes|Clostridia|Clostridiales|Peptostreptococcaceae
307802	#N/A	#N/A	#N/A	#N/A	#N/A	#N/A	#N/A	#N/A	#N/A	0	0	0	0	0	0	0	0	0	0	0	0	0	3	0	1	0	1	1	0	0	0	0	0	Bacteria|Firmicutes|Clostridia|Clostridiales
270968	#N/A	#N/A	#N/A	#N/A	#N/A	#N/A	#N/A	#N/A	#N/A	0	1	1	0	0	0	0	0	0	0	2	0	0	0	1	0	1	3	0	0	0	0	1	0	Bacteria|Firmicutes|Clostridia|Clostridiales|Lachnospiraceae|[Ruminococcus]|gnavus
349874	#N/A	#N/A	#N/A	#N/A	#N/A	#N/A	#N/A	#N/A	#N/A	0	59	0	0	0	0	0	0	0	0	0	0	0	0	0	0	0	0	0	0	0	0	0	0	Bacteria|Firmicutes|Clostridia|Clostridiales
575261	16	-0.267261	0.375	2	-0.09759	0	#N/A	#N/A	#N/A	0	3	2	0	3	3	3	0	0	7	12	1	9	2	5	0	1	3	2	5	1	8	4	3	Bacteria|Firmicutes|Clostridia|Clostridiales|Lachnospiraceae
356148	17	0.561951	0	9	-0.352207	0.56	19	0.956325	0	6	3	5	0	5	2	4	6	0	8	11	3	7	3	1	1	1	3	4	1	1	2	4	1	Bacteria|Firmicutes|Clostridia|Clostridiales|Lachnospiraceae
2198356	2	-0.44643	0	#N/A	#N/A	#N/A	21	0.235702	0	5	4	2	2	3	1	0	3	1	2	1	2	1	5	2	2	0	3	6	1	0	0	1	0	Bacteria|Bacteroidetes|Bacteroidia|Bacteroidales|Bacteroidaceae|Bacteroides
310877	#N/A	#N/A	#N/A	5	0.205196	0	0	1.96509	0.0907029	28	207	226	7	259	60	328	37	45	147	587	53	99	55	0	4	101	23	40	16	599	335	383	445	Bacteria|Firmicutes|Clostridia|Clostridiales|Lachnospiraceae
1107027	22	1.43208	0	#N/A	#N/A	#N/A	10	0.168073	0	2	6	0	0	0	0	1	3	0	3	1	2	0	0	0	0	2	1	3	0	0	0	2	1	Bacteria|Firmicutes|Bacilli|Lactobacillales|Lactobacillaceae|Lactobacillus
1108745	8	1.03078	0	#N/A	#N/A	#N/A	8	2.04124	0	10	60	0	0	0	5	0	15	0	44	53	6	0	0	0	0	0	0	12	0	27	26	17	30	Bacteria|Firmicutes|Clostridia|Clostridiales|[Mogibacteriaceae]
752584	#N/A	#N/A	#N/A	#N/A	#N/A	#N/A	#N/A	#N/A	#N/A	0	0	0	0	0	0	0	3	0	0	0	0	0	0	0	0	0	0	0	0	0	0	0	0	Bacteria|Proteobacteria|Gammaproteobacteria|Enterobacteriales|Enterobacteriaceae
797229	#N/A	#N/A	#N/A	16	0	0	#N/A	#N/A	#N/A	0	0	1	0	0	1	0	0	5	1	0	1	0	0	0	1	1	1	1	0	1	0	0	1	Bacteria|Proteobacteria|Gammaproteobacteria|Enterobacteriales|Enterobacteriaceae
275061	4	-0.0980581	0	#N/A	#N/A	#N/A	14	-0.0985329	0	155	56	23	0	0	0	70	0	0	113	110	0	1	0	97	173	269	0	522	317	0	0	131	173	Bacteria|Firmicutes|Clostridia|Clostridiales|Ruminococcaceae
466811	#N/A	#N/A	#N/A	10	-0.935414	0	#N/A	#N/A	#N/A	15	7	0	7	35	15	13	11	24	6	9	0	3	0	52	1	220	0	18	14	86	1	21	7	Bacteria|Firmicutes|Clostridia|Clostridiales
275069	#N/A	#N/A	#N/A	#N/A	#N/A	#N/A	#N/A	#N/A	#N/A	0	0	0	0	0	0	0	0	0	0	0	0	0	0	0	0	1	0	0	0	0	0	0	0	Bacteria|Firmicutes|Clostridia|Clostridiales
186711	24	1	0	9	-0.592739	0	42	0	0	5	12	9	9	13	0	10	5	0	2	6	6	7	3	1	7	5	10	9	5	21	12	1	15	Bacteria|Bacteroidetes|Bacteroidia|Bacteroidales|Prevotellaceae
191958	#N/A	#N/A	#N/A	#N/A	#N/A	#N/A	19	-0.281272	0	0	0	0	1	0	1	0	0	0	0	0	0	0	0	0	0	0	6	1	0	0	1	1	0	Bacteria|Firmicutes|Clostridia|Clostridiales|Lachnospiraceae
212170	#N/A	#N/A	#N/A	#N/A	#N/A	#N/A	#N/A	#N/A	#N/A	0	0	0	0	0	0	0	0	0	0	0	0	0	0	0	0	0	0	0	0	0	0	0	1	Bacteria|Bacteroidetes|Bacteroidia|Bacteroidales|S24-7
517548	#N/A	#N/A	#N/A	#N/A	#N/A	#N/A	#N/A	#N/A	#N/A	0	0	0	0	0	0	0	0	1	0	0	0	0	0	0	0	0	0	0	0	0	0	0	0	Bacteria|Proteobacteria|Gammaproteobacteria|Pasteurellales|Pasteurellaceae|Haemophilus
196689	#N/A	#N/A	#N/A	#N/A	#N/A	#N/A	#N/A	#N/A	#N/A	0	0	0	0	0	0	0	0	0	1	0	0	0	0	0	0	0	0	0	0	0	0	0	0	Bacteria|Firmicutes|Clostridia|Clostridiales
352799	#N/A	#N/A	#N/A	7	1.875	0	0	-1.20731	0	0	0	0	0	0	0	1	0	2	2	1	1	0	0	0	0	1	0	0	0	6	1	3	7	Bacteria|Firmicutes|Clostridia|Clostridiales|Lachnospiraceae
271766	#N/A	#N/A	#N/A	#N/A	#N/A	#N/A	#N/A	#N/A	#N/A	0	0	0	0	1	0	1	0	1	0	0	2	0	1	0	0	1	0	0	0	0	1	1	0	Bacteria|Firmicutes|Clostridia|Clostridiales
314406	#N/A	#N/A	#N/A	5	-0.410391	0	#N/A	#N/A	#N/A	3	7	5	13	6	10	0	4	1	1	0	2	6	5	1	5	0	7	0	0	0	0	0	6	Bacteria|Bacteroidetes|Bacteroidia|Bacteroidales|Porphyromonadaceae|Parabacteroides
4374853	#N/A	#N/A	#N/A	#N/A	#N/A	#N/A	#N/A	#N/A	#N/A	0	0	0	0	0	0	1	0	0	0	0	0	0	0	0	0	0	0	0	0	0	0	0	0	Bacteria|Firmicutes|Clostridia|Clostridiales|Clostridiaceae
421792	9	0.215666	0	31	0	0	8	0.408248	0	1	4	452	112	2	3	17	1	0	3133	4	1683	4	0	0	3	0	0	23	0	744	95	2509	0	Bacteria|Bacteroidetes|Bacteroidia|Bacteroidales|S24-7
183384	#N/A	#N/A	#N/A	#N/A	#N/A	#N/A	#N/A	#N/A	#N/A	0	0	0	0	0	0	0	0	0	0	0	0	0	0	0	0	0	0	0	0	0	0	0	2	Bacteria|Bacteroidetes|Bacteroidia|Bacteroidales|S24-7
264785	4	-1.12767	0.5	#N/A	#N/A	#N/A	5	-0.94114	0	0	2	2	1	1	1	2	1	0	0	1	0	1	0	1	0	0	2	1	0	0	2	1	2	Bacteria|Firmicutes|Clostridia|Clostridiales|Ruminococcaceae|Oscillospira
2897325	#N/A	#N/A	#N/A	8	0.930465	0	3	0.564076	0	1112	3608	3529	1846	4039	1758	6545	2916	127	1935	7036	3013	1408	1801	1302	1016	2379	3738	4030	4303	1801	2478	2574	1183	Bacteria|Proteobacteria|Deltaproteobacteria|Desulfovibrionales|Desulfovibrionaceae|Bilophila
189840	#N/A	#N/A	#N/A	#N/A	#N/A	#N/A	#N/A	#N/A	#N/A	0	0	0	0	1	0	0	3	0	0	0	0	0	0	0	0	0	0	0	0	0	1	0	0	Bacteria|Firmicutes|Clostridia|Clostridiales|Ruminococcaceae
258849	#N/A	#N/A	#N/A	#N/A	#N/A	#N/A	23	1	0	3	2	0	0	1	0	4	0	1	6	0	1	3	1	1	6	1	6	3	9	2	0	4	3	Bacteria|Bacteroidetes|Bacteroidia|Bacteroidales|S24-7
233411	#N/A	#N/A	#N/A	#N/A	#N/A	#N/A	#N/A	#N/A	#N/A	0	0	0	0	0	0	1	2	0	0	0	0	0	0	2	0	0	0	1	1	0	0	0	0	Bacteria|Firmicutes|Clostridia|Clostridiales
178735	#N/A	#N/A	#N/A	#N/A	#N/A	#N/A	#N/A	#N/A	#N/A	0	0	0	0	0	0	0	0	0	0	1	0	0	0	0	0	0	0	0	0	0	0	0	0	Bacteria|Actinobacteria|Coriobacteriia|Coriobacteriales|Coriobacteriaceae|Adlercreutzia
273724	#N/A	#N/A	#N/A	#N/A	#N/A	#N/A	#N/A	#N/A	#N/A	0	0	0	0	0	0	0	0	0	0	1	0	0	0	0	0	0	0	0	0	0	0	0	0	Bacteria|Firmicutes|Clostridia|Clostridiales|Ruminococcaceae|Oscillospira
263252	1	-0.836622	0	6	-0.359092	0	#N/A	#N/A	#N/A	7	4	6	7	0	0	0	10	9	3	1	0	0	6	9	12	20	6	22	13	0	7	6	11	Bacteria|Firmicutes|Clostridia|Clostridiales|Ruminococcaceae
4425571	#N/A	#N/A	#N/A	#N/A	#N/A	#N/A	#N/A	#N/A	#N/A	0	0	0	0	0	0	0	0	0	0	0	0	0	0	0	0	0	1	0	0	0	0	0	0	Bacteria|Proteobacteria|Gammaproteobacteria|Enterobacteriales|Enterobacteriaceae
322059	#N/A	#N/A	#N/A	#N/A	#N/A	#N/A	#N/A	#N/A	#N/A	1	0	0	0	0	0	0	0	0	0	0	0	0	0	0	0	0	0	0	0	0	0	0	0	Bacteria|Bacteroidetes|Bacteroidia|Bacteroidales|S24-7
181940	#N/A	#N/A	#N/A	#N/A	#N/A	#N/A	#N/A	#N/A	#N/A	0	0	0	0	0	0	0	0	0	1	0	0	0	1	0	0	0	0	0	0	0	0	0	0	Bacteria|Firmicutes|Clostridia|Clostridiales|Ruminococcaceae
190971	#N/A	#N/A	#N/A	#N/A	#N/A	#N/A	#N/A	#N/A	#N/A	0	0	0	0	0	0	0	0	0	0	3	0	0	1	16	0	0	0	0	2	0	0	0	2	Bacteria|Firmicutes|Clostridia|Clostridiales
206633	18	-0.756329	0	9	-0.592739	0	9	-0.490466	0	3	1	3	9	2	2	0	0	0	2	2	2	5	6	1	3	5	3	4	2	2	3	2	3	Bacteria|Bacteroidetes|Bacteroidia|Bacteroidales|S24-7
341252	24	-1	0	#N/A	#N/A	#N/A	13	-1.13389	0	10	3	13	1	3	0	0	1	0	91	0	0	2	0	0	0	1	2	110	0	22	1126	3	2	Bacteria|Firmicutes|Clostridia|Clostridiales
107044	12	-1.15204	0	1	3.62607	0.21875	10	1.57989	0	2	0	0	2	0	19	7	7	0	2	1	1	1	1	16	8	4	5	20	23	24	13	2	8	Bacteria|Bacteroidetes|Bacteroidia|Bacteroidales|Rikenellaceae|Alistipes|massiliensis
338796	3	1.50555	0	#N/A	#N/A	#N/A	1	-1.00626	0	12	12	13	5	19	10	7	21	9	10	18	12	1	6	28	8	14	17	15	41	14	14	8	5	Bacteria|Firmicutes|Clostridia|Clostridiales|Ruminococcaceae|Oscillospira
372906	2	-0.990516	0	#N/A	#N/A	#N/A	24	-0.447214	0	8	47	20	16	4	33	4	18	34	17	95	12	36	51	63	74	115	57	40	25	23	6	63	101	Bacteria|Firmicutes|Clostridia|Clostridiales|Lachnospiraceae|[Ruminococcus]|gnavus
267335	#N/A	#N/A	#N/A	#N/A	#N/A	#N/A	#N/A	#N/A	#N/A	1	3	0	0	0	0	0	2	0	3	0	1	0	0	0	0	0	1	0	1	0	0	0	0	Bacteria|Firmicutes|Clostridia|Clostridiales|Lachnospiraceae|[Ruminococcus]|gnavus
183619	#N/A	#N/A	#N/A	#N/A	#N/A	#N/A	#N/A	#N/A	#N/A	1	0	0	0	0	0	0	0	0	0	0	0	0	0	0	0	0	0	0	0	0	0	0	0	Bacteria|Bacteroidetes|Bacteroidia|Bacteroidales|Bacteroidaceae|Bacteroides
4290144	#N/A	#N/A	#N/A	#N/A	#N/A	#N/A	#N/A	#N/A	#N/A	0	0	0	0	0	0	1	0	0	0	0	0	0	0	0	0	0	0	0	0	0	0	0	0	Bacteria|Firmicutes|Bacilli|Lactobacillales|Enterococcaceae|Enterococcus
267689	#N/A	#N/A	#N/A	2	-0.09759	0	3	-0.993848	0	0	1	0	0	2	0	0	1	0	1	1	0	1	1	1	1	1	0	2	2	2	0	1	3	Bacteria|Firmicutes|Clostridia|Clostridiales|Ruminococcaceae
351309	3	-0.354246	0.444444	#N/A	#N/A	#N/A	12	-0.520483	0	17131	17231	16831	7481	14643	7216	23135	23424	291	32062	1846	17044	11120	1587	46	5993	9625	16200	7207	13275	1722	8882	7999	2711	Bacteria|Firmicutes|Clostridia|Clostridiales
4174105	#N/A	#N/A	#N/A	#N/A	#N/A	#N/A	#N/A	#N/A	#N/A	0	0	1	0	0	0	0	0	0	0	0	0	0	0	0	0	0	0	0	0	0	0	0	0	Bacteria|Firmicutes|Clostridia|Clostridiales|Lachnospiraceae
590099	#N/A	#N/A	#N/A	#N/A	#N/A	#N/A	#N/A	#N/A	#N/A	0	0	0	0	0	0	0	0	0	0	0	0	0	0	0	0	0	0	0	0	1	0	0	0	Bacteria|Proteobacteria|Alphaproteobacteria|Sphingomonadales|Sphingomonadaceae|Sphingomonas
228479	#N/A	#N/A	#N/A	#N/A	#N/A	#N/A	#N/A	#N/A	#N/A	0	0	0	0	0	0	0	0	0	0	0	0	1	0	0	0	0	0	0	0	0	0	0	0	Bacteria|Bacteroidetes|Bacteroidia|Bacteroidales|S24-7
207340	#N/A	#N/A	#N/A	#N/A	#N/A	#N/A	8	0.408248	0	1	20	0	0	0	0	0	7	0	12	16	0	0	0	0	0	0	0	1	0	9	8	2	11	Bacteria|Firmicutes|Clostridia|Clostridiales|[Mogibacteriaceae]
406247	6	1.43622	0	5	1.43637	0	5	0.0723954	0	137	138	146	70	155	72	203	181	2	293	34	182	112	17	0	43	104	126	81	154	14	71	110	23	Bacteria|Firmicutes|Clostridia|Clostridiales
1039477	#N/A	#N/A	#N/A	#N/A	#N/A	#N/A	#N/A	#N/A	#N/A	0	0	0	0	0	0	0	0	0	0	1	0	0	0	0	0	0	0	0	0	0	0	0	0	Bacteria|Firmicutes|Bacilli|Bacillales|Staphylococcaceae|Staphylococcus|epidermidis
266621	#N/A	#N/A	#N/A	#N/A	#N/A	#N/A	#N/A	#N/A	#N/A	0	0	0	0	0	0	0	0	0	0	0	0	0	0	0	2	0	0	0	0	0	0	0	0	Bacteria|Firmicutes|Clostridia|Clostridiales|Lachnospiraceae|Coprococcus
180235	#N/A	#N/A	#N/A	1	-0.237775	0.625	2	-0.747553	0	169	141	1	36	94	20	18	29	0	48	34	201	59	85	1	5	98	0	71	262	47	166	95	84	Bacteria|Firmicutes|Clostridia|Clostridiales|Ruminococcaceae|Oscillospira
359149	#N/A	#N/A	#N/A	#N/A	#N/A	#N/A	#N/A	#N/A	#N/A	0	0	0	0	1	0	0	0	0	0	0	0	0	0	0	0	0	0	0	0	0	0	0	0	Bacteria|Firmicutes|Clostridia|Clostridiales
259884	#N/A	#N/A	#N/A	#N/A	#N/A	#N/A	#N/A	#N/A	#N/A	0	0	0	0	3	0	0	1	0	1	2	0	0	2	0	0	0	0	0	1	1	0	0	1	Bacteria|Firmicutes|Clostridia|Clostridiales|Ruminococcaceae|Oscillospira
287507	30	-0.57735	0	9	-0.833271	0	3	0.564076	0	0	0	0	24	21	63	11	16	0	46	45	9	11	2	21	18	423	43	100	13	1	1	386	21	Bacteria|Firmicutes|Clostridia|Clostridiales|Lachnospiraceae
846127	#N/A	#N/A	#N/A	#N/A	#N/A	#N/A	#N/A	#N/A	#N/A	0	0	0	2	0	0	0	0	0	0	0	0	0	0	0	0	0	0	0	0	0	0	0	0	Bacteria|Bacteroidetes|Bacteroidia|Bacteroidales|Porphyromonadaceae|Parabacteroides
341913	#N/A	#N/A	#N/A	#N/A	#N/A	#N/A	18	-1.02062	0	1	0	1	0	0	1	0	0	0	0	1	1	0	0	0	1	2	0	1	0	1	1	0	1	Bacteria|Bacteroidetes|Bacteroidia|Bacteroidales|S24-7
267536	1	-0.320408	0	2	0.48795	0	14	-0.0985329	0	0	2	4	2	2	3	4	3	0	4	18	0	4	6	1	0	2	0	1	1	0	16	10	3	Bacteria|Firmicutes|Clostridia|Clostridiales|[Mogibacteriaceae]
2286580	#N/A	#N/A	#N/A	#N/A	#N/A	#N/A	#N/A	#N/A	#N/A	0	0	0	0	0	0	0	0	0	0	0	0	0	0	0	0	0	0	0	7	0	0	0	0	Bacteria|Tenericutes|Mollicutes|RF39
326609	#N/A	#N/A	#N/A	#N/A	#N/A	#N/A	#N/A	#N/A	#N/A	0	0	0	0	0	0	0	0	0	0	34	9	0	0	0	0	0	0	0	0	0	0	0	45	Bacteria|Firmicutes|Clostridia|Clostridiales|Ruminococcaceae
263815	#N/A	#N/A	#N/A	#N/A	#N/A	#N/A	#N/A	#N/A	#N/A	0	0	0	0	0	0	0	0	0	0	0	1	2	0	1	0	1	0	0	0	0	0	2	0	Bacteria|Firmicutes|Clostridia|Clostridiales
207288	#N/A	#N/A	#N/A	#N/A	#N/A	#N/A	#N/A	#N/A	#N/A	0	0	1	0	0	0	0	0	0	0	0	0	1	0	1	0	0	0	0	1	0	0	0	0	Bacteria|Bacteroidetes|Bacteroidia|Bacteroidales|S24-7
839200	#N/A	#N/A	#N/A	24	1.36083	0	#N/A	#N/A	#N/A	0	0	0	0	0	53	0	200	252	0	0	299	0	2553	249	1	0	1216	2683	16	0	0	0	0	Bacteria|Firmicutes|Clostridia|Clostridiales|Lachnospiraceae|Dorea
260410	2	-0.44643	0.444444	2	0.48795	0	1	-1.00626	0	135	136	97	226	186	423	130	65	23	51	382	102	75	154	184	154	112	331	351	122	74	169	117	28	Bacteria|Bacteroidetes|Bacteroidia|Bacteroidales|Bacteroidaceae|Bacteroides
520931	5	1.04257	0	3	2.02288	0	0	-0.539438	0.5625	620	813	542	309	950	507	389	998	120	345	1014	627	359	511	1300	312	758	676	962	2153	403	667	481	266	Bacteria|Firmicutes|Clostridia|Clostridiales|Ruminococcaceae|Oscillospira
214360	#N/A	#N/A	#N/A	9	-0.111675	0.32	#N/A	#N/A	#N/A	2	0	1	0	4	1	0	1	0	1	4	6	5	2	2	1	0	1	2	3	2	5	5	3	Bacteria|Bacteroidetes|Bacteroidia|Bacteroidales|S24-7
561312	#N/A	#N/A	#N/A	#N/A	#N/A	#N/A	#N/A	#N/A	#N/A	0	0	0	0	0	0	0	1	0	0	0	0	0	0	0	0	0	0	0	0	0	0	0	0	Bacteria|Firmicutes|Clostridia|Clostridiales
348398	#N/A	#N/A	#N/A	#N/A	#N/A	#N/A	#N/A	#N/A	#N/A	0	77	0	0	0	0	0	0	0	0	0	0	0	0	0	0	0	0	0	0	0	0	0	0	Bacteria|Firmicutes|Clostridia|Clostridiales
262673	#N/A	#N/A	#N/A	#N/A	#N/A	#N/A	#N/A	#N/A	#N/A	0	1	0	0	0	0	0	0	0	0	0	0	0	0	0	0	0	0	0	0	0	0	0	0	Bacteria|Firmicutes|Clostridia|Clostridiales
340650	#N/A	#N/A	#N/A	#N/A	#N/A	#N/A	5	0.579163	0	127	101	49	8	108	86	15	168	2	30	76	2	0	29	0	15	1	52	24	54	10	13	2	5	Bacteria|Firmicutes|Clostridia|Clostridiales
1112139	#N/A	#N/A	#N/A	#N/A	#N/A	#N/A	#N/A	#N/A	#N/A	0	0	1	0	0	0	0	0	0	0	0	0	0	0	0	0	0	0	0	0	1	0	0	0	Bacteria|Firmicutes|Clostridia|Clostridiales
262677	53	0	0	3	-0.475971	0	#N/A	#N/A	#N/A	8	9	0	10	21	1	17	38	0	11	20	28	15	0	32	14	17	45	51	61	0	0	17	9	Bacteria|Firmicutes|Clostridia|Clostridiales|Ruminococcaceae|Oscillospira
317653	2	-0.990516	0	6	-0.359092	0	9	-1.07011	0	26	56	0	2	22	12	1	9	0	45	0	29	41	6	19	1	2	2	8	79	55	3	29	30	Bacteria|Firmicutes|Clostridia|Clostridiales
192684	0	0.850746	0	#N/A	#N/A	#N/A	15	0	0	3918	3004	2030	3691	2353	2537	1222	1425	98	73	557	1228	1067	1970	2156	2634	325	4034	3771	3703	925	1990	358	1629	Bacteria|Bacteroidetes|Bacteroidia|Bacteroidales|Bacteroidaceae|Bacteroides
231028	#N/A	#N/A	#N/A	#N/A	#N/A	#N/A	#N/A	#N/A	#N/A	2	0	1	0	0	0	0	0	0	0	1	0	0	0	0	0	0	0	0	0	0	0	0	0	Bacteria|Firmicutes|Clostridia|Clostridiales|Ruminococcaceae|Oscillospira
276802	#N/A	#N/A	#N/A	#N/A	#N/A	#N/A	#N/A	#N/A	#N/A	0	0	0	0	0	0	0	0	0	0	0	0	0	0	0	1	0	0	0	0	0	0	0	0	Bacteria|Bacteroidetes|Bacteroidia|Bacteroidales|S24-7
261414	#N/A	#N/A	#N/A	#N/A	#N/A	#N/A	#N/A	#N/A	#N/A	0	0	0	0	0	0	0	0	0	0	0	0	0	0	1	0	0	1	0	0	0	0	0	0	Bacteria|Firmicutes|Clostridia|Clostridiales
640999	#N/A	#N/A	#N/A	#N/A	#N/A	#N/A	#N/A	#N/A	#N/A	0	0	0	0	0	0	0	4	0	0	0	0	0	0	0	0	0	0	0	0	0	0	0	0	Bacteria|Firmicutes|Clostridia|Clostridiales
314374	#N/A	#N/A	#N/A	#N/A	#N/A	#N/A	6	0.159503	0	0	0	0	0	0	1	0	0	0	0	0	0	0	0	0	1	1	0	0	0	2	1	1	0	Bacteria|Firmicutes|Clostridia|Clostridiales|Dehalobacteriaceae|Dehalobacterium
261894	#N/A	#N/A	#N/A	#N/A	#N/A	#N/A	#N/A	#N/A	#N/A	0	0	0	0	0	0	0	0	0	0	0	0	0	0	1	0	0	0	0	0	1	0	0	0	Bacteria|Firmicutes|Clostridia|Clostridiales|Ruminococcaceae|Oscillospira
4477019	#N/A	#N/A	#N/A	#N/A	#N/A	#N/A	#N/A	#N/A	#N/A	0	1	0	0	0	0	0	0	0	0	0	0	0	0	0	0	0	0	0	0	0	0	0	0	Bacteria|Bacteroidetes|Bacteroidia|Bacteroidales|Porphyromonadaceae|Parabacteroides
270391	0	-0.867106	0	32	0	0	38	0	0	1639	5750	463	2147	6858	4764	5949	2632	1259	8295	6769	1557	1460	5807	3797	1920	1041	101	9141	1916	4799	6139	4145	1620	Bacteria|Bacteroidetes|Bacteroidia|Bacteroidales|Rikenellaceae
191558	#N/A	#N/A	#N/A	#N/A	#N/A	#N/A	#N/A	#N/A	#N/A	0	0	0	0	0	0	0	0	0	0	0	0	0	0	0	0	0	0	0	0	0	0	0	1	Bacteria|Firmicutes|Clostridia|Clostridiales|Ruminococcaceae|Oscillospira
632140	#N/A	#N/A	#N/A	#N/A	#N/A	#N/A	#N/A	#N/A	#N/A	0	0	0	1	0	0	0	0	0	0	0	0	0	0	0	0	0	0	0	0	0	0	0	0	Bacteria|Bacteroidetes|Sphingobacteriia|Sphingobacteriales|Sphingobacteriaceae|Sphingobacterium|multivorum
330951	#N/A	#N/A	#N/A	#N/A	#N/A	#N/A	#N/A	#N/A	#N/A	0	0	0	0	1	1	0	0	0	0	0	0	0	0	0	0	0	0	0	0	0	0	0	0	Bacteria|Proteobacteria|Gammaproteobacteria|Pseudomonadales|Moraxellaceae|Acinetobacter
191797	#N/A	#N/A	#N/A	#N/A	#N/A	#N/A	#N/A	#N/A	#N/A	0	0	0	0	0	0	1	0	0	0	0	0	0	0	0	0	0	0	0	0	0	0	0	0	Bacteria|Firmicutes|Clostridia|Clostridiales|Clostridiaceae
192598	#N/A	#N/A	#N/A	#N/A	#N/A	#N/A	13	0.881917	0	0	2	0	0	0	2	0	3	0	0	3	0	0	0	0	0	0	0	3	3	2	1	0	0	Bacteria|Firmicutes|Clostridia|Clostridiales|Ruminococcaceae|Ruminococcus
554338	#N/A	#N/A	#N/A	#N/A	#N/A	#N/A	#N/A	#N/A	#N/A	0	0	0	0	0	0	0	0	0	2	0	0	0	0	0	0	0	0	0	0	0	0	0	0	Bacteria|Firmicutes|Clostridia|Clostridiales|Lachnospiraceae|Blautia|producta
191067	#N/A	#N/A	#N/A	#N/A	#N/A	#N/A	#N/A	#N/A	#N/A	0	0	0	0	0	0	1	0	0	0	0	0	0	0	0	0	0	0	0	0	0	0	0	0	Bacteria|Firmicutes|Clostridia|Clostridiales
4343528	#N/A	#N/A	#N/A	#N/A	#N/A	#N/A	#N/A	#N/A	#N/A	0	0	0	1	0	0	0	0	0	0	0	1	0	0	1	0	1	0	1	0	0	0	0	0	Bacteria|Firmicutes|Clostridia|Clostridiales|Ruminococcaceae|Oscillospira
260752	0	4.28645	0.165289	29	0	0	#N/A	#N/A	#N/A	0	141	276	58	0	10	0	0	5	0	300	0	507	0	1	0	0	0	0	0	0	99	0	163	Bacteria|Firmicutes|Clostridia|Clostridiales|Lachnospiraceae
4365130	#N/A	#N/A	#N/A	#N/A	#N/A	#N/A	14	-0.738997	0.5	4	12	4	16	12	19	79	6	10	9	4	5	12	7	20	17	6	16	8	11	32	18	9	6	Bacteria|Bacteroidetes|Bacteroidia|Bacteroidales|Porphyromonadaceae|Parabacteroides|distasonis
189884	#N/A	#N/A	#N/A	#N/A	#N/A	#N/A	#N/A	#N/A	#N/A	0	1	1	0	0	0	0	1	0	0	1	0	0	0	1	0	0	0	1	1	1	1	1	1	Bacteria|Firmicutes|Clostridia|Clostridiales|Ruminococcaceae|Oscillospira
587269	#N/A	#N/A	#N/A	#N/A	#N/A	#N/A	#N/A	#N/A	#N/A	0	0	0	0	0	0	0	0	0	1058	0	0	0	0	0	0	0	0	0	0	0	0	0	0	Bacteria|Firmicutes|Clostridia|Clostridiales|Lachnospiraceae|Blautia|producta
4399495	10	0.781736	0	6	-1.02598	0	12	-1.0988	0	7	8	5	6	2	4	5	1	3	6	0	10	22	9	3	5	5	2	0	2	0	0	10	2	Bacteria|Bacteroidetes|Bacteroidia|Bacteroidales|Bacteroidaceae|Bacteroides
265576	#N/A	#N/A	#N/A	#N/A	#N/A	#N/A	#N/A	#N/A	#N/A	0	0	0	0	0	0	0	0	0	1	0	0	0	0	0	0	0	0	0	0	0	0	0	0	Bacteria|Firmicutes|Clostridia|Clostridiales|Lachnospiraceae|Coprococcus
2874602	#N/A	#N/A	#N/A	#N/A	#N/A	#N/A	#N/A	#N/A	#N/A	1	0	0	0	0	0	0	0	0	0	0	0	1	0	0	0	0	0	0	0	0	0	0	0	Bacteria|Bacteroidetes|Bacteroidia|Bacteroidales|Bacteroidaceae|Bacteroides
269681	#N/A	#N/A	#N/A	#N/A	#N/A	#N/A	#N/A	#N/A	#N/A	0	0	0	0	0	0	0	0	0	0	0	0	0	0	0	0	0	0	1	3	0	0	0	0	Bacteria|Firmicutes|Clostridia|Clostridiales|Ruminococcaceae
270081	#N/A	#N/A	#N/A	#N/A	#N/A	#N/A	8	-0.408248	0	0	0	0	0	0	0	0	1	1	1	2	0	0	0	2	1	5	0	1	0	1	1	2	1	Bacteria|Firmicutes|Clostridia|Clostridiales|Lachnospiraceae|[Ruminococcus]|gnavus
173900	#N/A	#N/A	#N/A	#N/A	#N/A	#N/A	#N/A	#N/A	#N/A	0	1	0	0	0	0	0	0	0	0	0	0	0	0	0	0	0	0	0	0	0	0	0	0	Bacteria|Firmicutes|Clostridia|Clostridiales|Lachnospiraceae
167420	6	0.0879316	0	7	-0.25	0	6	1.29881	0	7	2	0	0	2	2	0	0	0	0	5	5	3	16	2	0	0	5	18	7	0	0	0	11	Bacteria|Firmicutes|Erysipelotrichi|Erysipelotrichales|Erysipelotrichaceae
261325	#N/A	#N/A	#N/A	#N/A	#N/A	#N/A	#N/A	#N/A	#N/A	0	0	0	0	0	0	1	0	9	0	0	0	0	0	0	0	5	0	0	0	0	0	0	2	Bacteria|Firmicutes|Clostridia|Clostridiales|Ruminococcaceae
278440	#N/A	#N/A	#N/A	#N/A	#N/A	#N/A	#N/A	#N/A	#N/A	1	1	0	0	1	0	0	0	0	0	0	0	0	0	0	0	0	0	0	0	0	1	0	0	Bacteria|Firmicutes|Clostridia|Clostridiales
346719	#N/A	#N/A	#N/A	#N/A	#N/A	#N/A	#N/A	#N/A	#N/A	0	0	0	0	3	0	0	0	0	4	3	0	2	0	0	0	9	0	0	0	0	6	0	2	Bacteria|Firmicutes|Clostridia|Clostridiales
550156	#N/A	#N/A	#N/A	#N/A	#N/A	#N/A	#N/A	#N/A	#N/A	0	0	0	0	0	0	3	0	0	0	0	0	0	0	7	0	0	0	2	0	0	0	0	0	Bacteria|Firmicutes|Clostridia|Clostridiales|Ruminococcaceae
269107	#N/A	#N/A	#N/A	#N/A	#N/A	#N/A	19	-0.90007	0	0	2	0	0	1	1	0	0	3	1	2	0	2	4	9	6	12	1	1	4	0	2	1	5	Bacteria|Firmicutes|Clostridia|Clostridiales|Lachnospiraceae|[Ruminococcus]|gnavus
191483	29	-0.57735	0	17	1.75	0	3	0.564076	0	3	1	2	4	0	1	2	1	4	2	0	7	6	1	0	0	1	0	0	1	0	0	2	1	Bacteria|Bacteroidetes|Bacteroidia|Bacteroidales|Bacteroidaceae|Bacteroides
192664	#N/A	#N/A	#N/A	#N/A	#N/A	#N/A	#N/A	#N/A	#N/A	0	0	0	0	0	0	0	0	0	1	0	0	0	0	0	0	0	0	0	0	0	2	0	1	Bacteria|Firmicutes|Clostridia|Clostridiales|Ruminococcaceae|Oscillospira
274128	#N/A	#N/A	#N/A	#N/A	#N/A	#N/A	#N/A	#N/A	#N/A	0	0	0	0	0	0	0	0	0	0	0	1	0	0	0	0	0	0	0	0	0	0	0	0	Bacteria|Firmicutes|Clostridia|Clostridiales
270158	6	-0.58621	0	0	-1.22474	0	4	-1.00037	0	2081	2076	1611	500	535	276	906	352	85	2146	2471	2473	1314	1730	473	328	1672	510	1521	1524	270	242	707	266	Bacteria|Bacteroidetes|Bacteroidia|Bacteroidales|S24-7
340474	25	0	0	#N/A	#N/A	#N/A	5	-0.434372	0	1	0	1	2	0	4	0	0	8	2	0	0	2	0	2	3	2	1	1	1	0	1	0	0	Bacteria|Bacteroidetes|Bacteroidia|Bacteroidales|Bacteroidaceae|Bacteroides
295075	#N/A	#N/A	#N/A	#N/A	#N/A	#N/A	#N/A	#N/A	#N/A	1	0	0	0	0	0	0	0	0	1	5	1	0	0	0	0	3	0	3	0	0	0	1	1	Bacteria|Firmicutes|Clostridia|Clostridiales|Lachnospiraceae|[Ruminococcus]|gnavus
372146	#N/A	#N/A	#N/A	#N/A	#N/A	#N/A	#N/A	#N/A	#N/A	1	2	0	0	2	0	1	0	0	0	3	2	2	0	0	0	1	0	0	0	0	1	0	1	Bacteria|Firmicutes|Clostridia|Clostridiales|Ruminococcaceae|Oscillospira
106663	#N/A	#N/A	#N/A	#N/A	#N/A	#N/A	#N/A	#N/A	#N/A	0	1	0	0	0	0	0	0	0	0	0	0	0	0	0	0	0	0	0	0	0	0	0	0	Bacteria|[Thermi]|Deinococci|Thermales|Thermaceae|Thermus
182157	9	0.215666	0	8	0.36018	0.32	13	0.881917	0	0	3	0	4	3	2	2	1	0	1	0	2	2	2	2	2	2	1	0	0	2	0	0	1	Bacteria|Bacteroidetes|Bacteroidia|Bacteroidales|Bacteroidaceae|Bacteroides
1952	11	2.12132	0	#N/A	#N/A	#N/A	#N/A	#N/A	#N/A	2	2	0	7	0	0	0	1	0	0	0	0	1	2	0	1	0	1	0	0	0	0	0	0	Bacteria|Bacteroidetes|Bacteroidia|Bacteroidales|Porphyromonadaceae|Parabacteroides
190207	#N/A	#N/A	#N/A	#N/A	#N/A	#N/A	#N/A	#N/A	#N/A	0	0	0	0	0	0	0	0	0	0	0	0	0	1	0	0	0	0	0	0	0	0	0	0	Bacteria|Bacteroidetes|Bacteroidia|Bacteroidales|S24-7
2093795	#N/A	#N/A	#N/A	#N/A	#N/A	#N/A	#N/A	#N/A	#N/A	0	0	0	1	0	0	0	0	0	0	0	0	0	0	0	0	0	0	0	0	0	0	0	0	Bacteria|Firmicutes|Clostridia|Clostridiales|Clostridiaceae
193887	#N/A	#N/A	#N/A	#N/A	#N/A	#N/A	#N/A	#N/A	#N/A	0	0	0	0	0	0	0	0	0	0	1	0	0	0	0	0	0	0	0	0	0	1	0	0	Bacteria|Firmicutes|Clostridia|Clostridiales|Lachnospiraceae|Roseburia
357028	#N/A	#N/A	#N/A	#N/A	#N/A	#N/A	#N/A	#N/A	#N/A	1	0	0	0	0	0	0	0	2	0	0	0	0	0	0	0	0	0	0	0	0	0	0	0	Bacteria|Firmicutes|Clostridia|Clostridiales
460953	#N/A	#N/A	#N/A	#N/A	#N/A	#N/A	#N/A	#N/A	#N/A	0	0	0	0	0	0	0	0	0	1	0	0	0	0	0	0	0	0	0	0	0	0	0	0	Bacteria|Bacteroidetes|Bacteroidia|Bacteroidales|S24-7
882616	#N/A	#N/A	#N/A	#N/A	#N/A	#N/A	#N/A	#N/A	#N/A	0	0	0	0	0	0	0	0	0	0	0	0	0	0	0	0	1	0	0	0	0	0	0	0	Bacteria|Proteobacteria|Alphaproteobacteria|Rhodospirillales|Acetobacteraceae
275895	#N/A	#N/A	#N/A	#N/A	#N/A	#N/A	#N/A	#N/A	#N/A	0	0	0	0	0	0	0	0	0	0	214	0	0	0	0	0	0	0	0	0	0	0	0	0	Bacteria|Firmicutes|Clostridia|Clostridiales
274380	#N/A	#N/A	#N/A	#N/A	#N/A	#N/A	#N/A	#N/A	#N/A	0	0	0	0	0	0	0	0	0	0	1	0	0	0	4	0	0	0	0	3	0	0	0	0	Bacteria|Firmicutes|Clostridia|Clostridiales
211667	#N/A	#N/A	#N/A	#N/A	#N/A	#N/A	#N/A	#N/A	#N/A	0	6	0	0	0	0	0	0	0	0	0	0	0	0	0	0	0	0	0	0	0	0	0	0	Bacteria|Firmicutes|Clostridia|Clostridiales|Ruminococcaceae|Ruminococcus
274387	#N/A	#N/A	#N/A	#N/A	#N/A	#N/A	#N/A	#N/A	#N/A	0	0	0	0	0	0	0	0	0	0	0	0	0	0	0	0	0	0	0	39	0	0	0	0	Bacteria|Firmicutes|Clostridia|Clostridiales
264429	16	-0.267261	0.375	12	0	0	5	-0.434372	0	1	14	1	1	5	8	5	0	0	3	7	1	0	2	1	1	0	3	1	12	0	1	7	3	Bacteria|Firmicutes|Clostridia|Clostridiales|Ruminococcaceae|Oscillospira
531374	#N/A	#N/A	#N/A	#N/A	#N/A	#N/A	#N/A	#N/A	#N/A	0	0	0	0	0	0	0	0	0	0	0	1	0	0	0	0	0	0	0	0	0	0	0	0	Bacteria|Firmicutes|Clostridia|Clostridiales|Peptostreptococcaceae
275470	#N/A	#N/A	#N/A	#N/A	#N/A	#N/A	4	2.10888	0.40625	0	0	0	1	0	0	0	0	1	8	0	0	0	0	2	0	1	0	3	3	0	1	0	0	Bacteria|Firmicutes|Clostridia|Clostridiales
360238	#N/A	#N/A	#N/A	#N/A	#N/A	#N/A	#N/A	#N/A	#N/A	0	0	0	1	0	0	0	0	0	0	0	0	0	0	0	0	0	0	0	0	0	0	0	0	Bacteria|Firmicutes|Erysipelotrichi|Erysipelotrichales|Erysipelotrichaceae
265958	#N/A	#N/A	#N/A	#N/A	#N/A	#N/A	#N/A	#N/A	#N/A	0	0	0	1	0	2	0	0	0	0	1	0	0	0	0	2	0	0	1	1	0	0	0	0	Bacteria|Firmicutes|Clostridia|Clostridiales|Ruminococcaceae
300851	#N/A	#N/A	#N/A	0	0.136083	0	5	-0.434372	0	6	16	1	9	58	52	33	29	1	26	9	12	9	0	6	0	2	12	19	50	2	15	29	26	Bacteria|Firmicutes|Clostridia|Clostridiales|Ruminococcaceae|Oscillospira
264134	2	0.0976565	0	15	-1.78885	0	7	0.508001	0	3	2	0	1	2	2	0	2	0	1	2	2	0	1	2	0	0	4	0	3	3	0	1	3	Bacteria|Firmicutes|Clostridia|Clostridiales
230268	#N/A	#N/A	#N/A	#N/A	#N/A	#N/A	#N/A	#N/A	#N/A	0	0	0	0	1	0	0	0	0	0	0	0	1	0	0	0	0	0	0	0	0	0	0	0	Bacteria|Firmicutes|Clostridia|Clostridiales|Ruminococcaceae|Ruminococcus
743396	14	0	0	2	-0.68313	0	53	0	0	1	10	4	1	8	2	4	5	0	3	18	2	3	4	4	0	7	2	9	3	0	10	9	2	Bacteria|Firmicutes|Clostridia|Clostridiales
265793	#N/A	#N/A	#N/A	16	1.22474	0.375	6	0.729158	0.32	0	2	0	0	0	0	0	4	0	0	15	0	2	6	1	0	1	4	4	3	2	0	1	6	Bacteria|Firmicutes|Clostridia|Clostridiales|Ruminococcaceae
216599	16	-1.06904	0	#N/A	#N/A	#N/A	52	0	0	2	59	0	40	75	31	106	0	147	80	60	1	92	0	20	69	127	46	190	165	78	22	76	4	Bacteria|Bacteroidetes|Bacteroidia|Bacteroidales|Rikenellaceae
191816	#N/A	#N/A	#N/A	#N/A	#N/A	#N/A	#N/A	#N/A	#N/A	0	0	0	0	0	0	0	1	0	0	0	0	0	5	17	0	0	0	0	0	0	0	0	0	Bacteria|Firmicutes|Clostridia|Clostridiales|Ruminococcaceae|Oscillospira
346648	#N/A	#N/A	#N/A	#N/A	#N/A	#N/A	#N/A	#N/A	#N/A	0	0	0	0	0	0	0	0	0	2	0	0	0	0	0	0	0	0	0	0	0	2	0	0	Bacteria|Firmicutes|Clostridia|Clostridiales|Lachnospiraceae
316587	#N/A	#N/A	#N/A	9	0.60992	0	13	2.89773	0.277778	0	0	2	1	0	0	0	1	0	8	7	8	4	3	3	1	2	2	0	0	0	0	4	2	Bacteria|Firmicutes|Bacilli|Lactobacillales|Streptococcaceae|Streptococcus
1110253	#N/A	#N/A	#N/A	#N/A	#N/A	#N/A	#N/A	#N/A	#N/A	0	0	0	0	0	0	0	1	0	1	0	0	0	0	1	0	0	0	5	1	2	0	0	0	Bacteria|Firmicutes|Clostridia|Clostridiales|Ruminococcaceae
339031	8	0	0	9	-0.833271	0	15	0	0	0	5	0	0	0	1	1	1	0	0	3	15	29	1	0	0	2	1	0	1	0	3	1	0	Bacteria|Firmicutes|Clostridia|Clostridiales|Ruminococcaceae|Ruminococcus
269070	1	0.195805	0	24	1.36083	0	12	0.636146	0	0	11	3	2	5	1	6	7	0	6	4	0	2	0	0	1	1	0	0	6	1	7	3	5	Bacteria|Firmicutes|Clostridia|Clostridiales|Ruminococcaceae
188137	#N/A	#N/A	#N/A	#N/A	#N/A	#N/A	#N/A	#N/A	#N/A	0	0	0	0	0	0	0	0	0	0	0	0	0	0	0	0	0	0	0	0	0	1	0	0	Bacteria|Firmicutes|Clostridia|Clostridiales|Lachnospiraceae
174770	#N/A	#N/A	#N/A	23	1.06904	0	12	2.37109	0	0	0	0	0	0	2	0	0	1	0	1	0	0	0	3	1	0	0	0	1	0	1	1	2	Bacteria|Firmicutes|Clostridia|Clostridiales
3997242	12	1.48119	0.367347	#N/A	#N/A	#N/A	#N/A	#N/A	#N/A	0	1	1	0	2	0	1	0	0	0	0	0	0	1	3	1	0	1	1	1	0	0	0	0	Bacteria|Bacteroidetes|Bacteroidia|Bacteroidales|Bacteroidaceae|Bacteroides
1113282	#N/A	#N/A	#N/A	#N/A	#N/A	#N/A	#N/A	#N/A	#N/A	0	0	0	0	0	0	0	0	0	0	0	0	0	2	0	0	0	0	0	0	0	0	0	0	Bacteria|Tenericutes|Mollicutes|RF39
3943182	#N/A	#N/A	#N/A	#N/A	#N/A	#N/A	#N/A	#N/A	#N/A	1	0	0	0	0	0	0	0	0	1	0	1	0	0	1	0	0	0	0	0	0	0	0	0	Bacteria|Bacteroidetes|Bacteroidia|Bacteroidales|Bacteroidaceae|Bacteroides
272953	30	-0.57735	0	5	0.205196	0	3	2.122	0	34	110	103	36	54	98	54	191	11	56	110	43	41	19	1	28	90	78	131	217	57	73	107	97	Bacteria|Firmicutes|Clostridia|Clostridiales|Ruminococcaceae|Oscillospira
269673	20	-1.23443	0	0	-1.22474	0	1	1.96677	0.244898	5	1	2	4	0	2	10	5	5	12	5	6	7	10	7	9	9	7	13	12	5	6	8	10	Bacteria|Bacteroidetes|Bacteroidia|Bacteroidales|S24-7
2086224	#N/A	#N/A	#N/A	#N/A	#N/A	#N/A	#N/A	#N/A	#N/A	0	0	0	0	0	0	0	0	0	0	0	0	0	0	0	0	0	1	0	0	0	0	0	0	Bacteria|Firmicutes|Clostridia|Clostridiales|Peptostreptococcaceae
310886	#N/A	#N/A	#N/A	#N/A	#N/A	#N/A	#N/A	#N/A	#N/A	0	0	0	0	0	0	1	1	0	0	0	0	0	0	0	0	0	0	0	0	0	0	0	0	Bacteria|Firmicutes|Clostridia|Clostridiales|Ruminococcaceae|Oscillospira
264225	#N/A	#N/A	#N/A	#N/A	#N/A	#N/A	#N/A	#N/A	#N/A	0	0	0	0	0	0	0	0	0	0	0	0	0	0	0	0	0	0	0	0	1	0	0	0	Bacteria|Firmicutes|Clostridia|Clostridiales
2038446	#N/A	#N/A	#N/A	#N/A	#N/A	#N/A	#N/A	#N/A	#N/A	0	0	0	0	0	0	0	0	0	0	0	0	0	0	0	0	0	0	0	0	0	0	1	0	Bacteria|Bacteroidetes|Bacteroidia|Bacteroidales|Bacteroidaceae|Bacteroides
350320	#N/A	#N/A	#N/A	#N/A	#N/A	#N/A	#N/A	#N/A	#N/A	0	4	0	0	0	0	0	0	0	0	3	0	0	0	0	0	0	0	0	0	0	0	0	0	Bacteria|Firmicutes|Clostridia|Clostridiales
549756	1	0.712019	0	#N/A	#N/A	#N/A	4	-1.00037	0	6	1	0	1	7	0	0	0	0	0	0	0	0	0	0	2	4	0	5	1	0	4	0	1	Bacteria|Firmicutes|Bacilli|Lactobacillales|Lactobacillaceae|Lactobacillus
268099	#N/A	#N/A	#N/A	#N/A	#N/A	#N/A	#N/A	#N/A	#N/A	0	0	0	0	0	0	0	0	0	0	0	0	0	0	0	0	0	0	1	0	0	0	0	0	Bacteria|Bacteroidetes|Bacteroidia|Bacteroidales|S24-7
826382	#N/A	#N/A	#N/A	#N/A	#N/A	#N/A	#N/A	#N/A	#N/A	0	0	1	49	0	0	0	0	0	0	0	0	0	0	0	0	0	0	0	0	0	3	0	0	Bacteria|Firmicutes|Clostridia|Clostridiales|Lachnospiraceae
574038	#N/A	#N/A	#N/A	#N/A	#N/A	#N/A	#N/A	#N/A	#N/A	1	0	0	0	0	0	0	0	0	0	0	1	0	0	0	0	0	1	2	0	0	0	0	0	Bacteria|Firmicutes|Clostridia|Clostridiales|Lachnospiraceae
3924627	#N/A	#N/A	#N/A	#N/A	#N/A	#N/A	#N/A	#N/A	#N/A	0	0	0	0	0	0	1	0	0	0	0	0	0	0	0	0	0	0	0	0	0	0	0	0	Bacteria|Firmicutes|Clostridia|Clostridiales|Lachnospiraceae
272004	#N/A	#N/A	#N/A	#N/A	#N/A	#N/A	#N/A	#N/A	#N/A	0	0	0	0	0	0	0	0	0	0	0	0	1	0	0	0	0	0	0	0	0	0	1	0	Bacteria|Firmicutes|Clostridia|Clostridiales|Ruminococcaceae|Oscillospira
179810	#N/A	#N/A	#N/A	#N/A	#N/A	#N/A	#N/A	#N/A	#N/A	0	0	0	0	0	0	0	1	0	0	0	1	0	0	0	1	0	0	0	3	0	0	2	1	Bacteria|Bacteroidetes|Bacteroidia|Bacteroidales|S24-7
305880	#N/A	#N/A	#N/A	#N/A	#N/A	#N/A	#N/A	#N/A	#N/A	0	0	0	0	1	0	0	0	0	0	0	0	0	1	0	0	0	0	0	0	0	0	0	0	Bacteria|Firmicutes|Clostridia|Clostridiales|Lachnospiraceae|[Ruminococcus]|gnavus
271759	22	-0.325472	0	#N/A	#N/A	#N/A	2	-0.0692178	0.375	1	1	0	0	0	0	1	4	0	0	0	0	0	2	0	0	1	1	3	0	0	1	0	1	Bacteria|Firmicutes|Erysipelotrichi|Erysipelotrichales|Erysipelotrichaceae|Allobaculum
179814	#N/A	#N/A	#N/A	#N/A	#N/A	#N/A	#N/A	#N/A	#N/A	0	0	0	0	0	0	0	0	0	0	2	0	0	0	0	0	0	0	0	0	0	0	0	0	Bacteria|Verrucomicrobia|Verrucomicrobiae|Verrucomicrobiales|Verrucomicrobiaceae|Akkermansia|muciniphila
462764	#N/A	#N/A	#N/A	27	0	0	0	-1.04034	0	385	3849	3005	1249	1788	1590	2036	2997	68	1386	3153	674	1310	2612	1086	1557	1938	3195	2444	4235	752	2279	1486	1711	Bacteria|Firmicutes|Clostridia|Clostridiales|Ruminococcaceae|Ruminococcus
271592	#N/A	#N/A	#N/A	#N/A	#N/A	#N/A	#N/A	#N/A	#N/A	0	0	0	0	0	0	0	0	0	0	0	0	0	0	0	0	0	0	1	0	0	0	0	0	Bacteria|Firmicutes|Clostridia|Clostridiales
271593	#N/A	#N/A	#N/A	#N/A	#N/A	#N/A	#N/A	#N/A	#N/A	0	0	0	0	0	0	0	0	0	0	1	0	0	0	0	0	0	0	0	0	0	0	0	0	Bacteria|Firmicutes|Clostridia|Clostridiales|Lachnospiraceae|Roseburia
352789	4	-0.0980581	0	#N/A	#N/A	#N/A	51	0	0	2	1	1	0	4	3	2	0	3	2	10	0	1	6	2	6	0	1	1	2	2	2	1	1	Bacteria|Bacteroidetes|Bacteroidia|Bacteroidales|S24-7
4381553	#N/A	#N/A	#N/A	#N/A	#N/A	#N/A	#N/A	#N/A	#N/A	0	0	0	0	0	0	0	0	1	0	0	0	0	0	0	1	1	0	0	0	1	0	0	0	Bacteria|Bacteroidetes|Bacteroidia|Bacteroidales|Bacteroidaceae|Bacteroides
3164394	19	-0.75	0	6	-1.02598	0	4	-0.378517	0	1	2	4	8	1	2	2	1	2	2	0	10	5	9	1	2	5	5	0	1	4	1	4	3	Bacteria|Bacteroidetes|Bacteroidia|Bacteroidales|Bacteroidaceae|Bacteroides
263337	#N/A	#N/A	#N/A	#N/A	#N/A	#N/A	#N/A	#N/A	#N/A	0	0	0	0	1	0	0	0	0	0	1	0	0	0	0	1	1	0	0	0	0	0	0	0	Bacteria|Firmicutes|Clostridia|Clostridiales|Ruminococcaceae|Oscillospira
313324	#N/A	#N/A	#N/A	#N/A	#N/A	#N/A	#N/A	#N/A	#N/A	0	0	0	0	0	0	0	0	0	0	0	0	0	1	0	0	0	0	0	0	0	0	0	0	Bacteria|Firmicutes|Clostridia|Clostridiales|Ruminococcaceae
815480	#N/A	#N/A	#N/A	#N/A	#N/A	#N/A	#N/A	#N/A	#N/A	1	0	0	1	0	0	0	0	0	0	1	0	0	0	0	0	0	0	0	0	0	0	0	0	Bacteria|Proteobacteria|Gammaproteobacteria|Xanthomonadales|Xanthomonadaceae|Stenotrophomonas
263248	#N/A	#N/A	#N/A	#N/A	#N/A	#N/A	#N/A	#N/A	#N/A	0	0	0	0	1	0	0	0	0	0	0	0	0	0	0	0	0	0	0	1	0	0	0	0	Bacteria|Firmicutes|Clostridia|Clostridiales|Peptostreptococcaceae
350314	#N/A	#N/A	#N/A	#N/A	#N/A	#N/A	#N/A	#N/A	#N/A	0	0	0	0	0	0	0	1	0	0	0	0	0	1	0	0	0	0	1	0	0	0	0	0	Bacteria|Firmicutes|Clostridia|Clostridiales
523244	#N/A	#N/A	#N/A	#N/A	#N/A	#N/A	0	1.29722	0	0	0	0	0	0	0	0	21	0	0	0	0	0	29	38	10	94	23	73	95	0	0	0	0	Bacteria|Firmicutes|Clostridia|Clostridiales|Ruminococcaceae
228391	#N/A	#N/A	#N/A	11	-0.312348	0	#N/A	#N/A	#N/A	0	1	2	0	0	0	0	0	3	1	1	2	1	0	0	0	0	0	0	0	2	4	0	1	Bacteria|Firmicutes|Clostridia|Clostridiales|Ruminococcaceae
375106	#N/A	#N/A	#N/A	11	0.468521	0	0	1.79813	0	0	0	0	0	0	0	0	382	1	0	0	1	0	358	438	189	1380	375	1217	1233	0	0	1	0	Bacteria|Firmicutes|Clostridia|Clostridiales|Ruminococcaceae
259506	#N/A	#N/A	#N/A	#N/A	#N/A	#N/A	#N/A	#N/A	#N/A	0	0	0	0	0	0	0	0	0	0	0	0	0	0	0	0	0	0	4	5	0	0	0	0	Bacteria|Firmicutes|Clostridia|Clostridiales|Ruminococcaceae|Oscillospira
303161	#N/A	#N/A	#N/A	#N/A	#N/A	#N/A	#N/A	#N/A	#N/A	0	0	0	0	0	0	0	0	0	0	0	0	0	0	0	0	1	0	0	0	0	0	1	0	Bacteria|Firmicutes|Bacilli|Lactobacillales|Streptococcaceae|Streptococcus|luteciae
192865	#N/A	#N/A	#N/A	4	-0.230429	0	#N/A	#N/A	#N/A	0	1	0	0	0	0	2	0	0	0	1	2	2	0	0	3	0	0	0	1	1	0	0	0	Bacteria|Bacteroidetes|Bacteroidia|Bacteroidales|Bacteroidaceae|Bacteroides
335311	#N/A	#N/A	#N/A	#N/A	#N/A	#N/A	#N/A	#N/A	#N/A	2	0	0	0	2	0	2	0	0	1	1	0	0	0	0	0	0	0	0	0	0	2	1	0	Bacteria|Firmicutes|Clostridia|Clostridiales
224212	#N/A	#N/A	#N/A	#N/A	#N/A	#N/A	#N/A	#N/A	#N/A	1	0	0	0	0	0	0	0	0	0	0	0	0	0	0	0	0	0	0	0	0	0	0	0	Bacteria|Proteobacteria|Gammaproteobacteria|Pseudomonadales|Moraxellaceae|Acinetobacter
553352	#N/A	#N/A	#N/A	19	1.5	0	4	-1.00037	0	16	0	0	18	74	0	0	0	7	0	1	0	0	1	0	50	49	0	51	15	0	55	7	8	Bacteria|Firmicutes|Bacilli|Lactobacillales|Lactobacillaceae|Lactobacillus
171079	12	-0.888716	0	44	0	0	2	0.609117	0	7	1	0	19	3	12	2	47	16	1	17	26	23	20	2	12	55	37	46	21	23	5	25	2	Bacteria|Firmicutes|Clostridia|Clostridiales|Ruminococcaceae|Ruminococcus
359376	#N/A	#N/A	#N/A	#N/A	#N/A	#N/A	#N/A	#N/A	#N/A	0	2	0	0	0	0	0	1	0	0	3	0	0	3	0	0	0	0	0	0	0	6	1	0	Bacteria|Verrucomicrobia|Verrucomicrobiae|Verrucomicrobiales|Verrucomicrobiaceae|Akkermansia|muciniphila
1931575	#N/A	#N/A	#N/A	#N/A	#N/A	#N/A	#N/A	#N/A	#N/A	0	0	0	0	0	0	0	0	0	0	0	0	0	0	0	0	0	0	1	0	0	0	0	0	Bacteria|Firmicutes|Clostridia|Clostridiales|Lachnospiraceae
337784	#N/A	#N/A	#N/A	#N/A	#N/A	#N/A	#N/A	#N/A	#N/A	1	0	0	0	0	0	0	0	0	0	0	0	0	0	0	0	0	0	0	0	0	0	0	0	Bacteria|Firmicutes|Clostridia|Clostridiales|[Mogibacteriaceae]
397065	#N/A	#N/A	#N/A	#N/A	#N/A	#N/A	#N/A	#N/A	#N/A	0	0	0	0	0	0	1	0	0	0	0	0	0	0	0	0	0	0	0	0	0	0	0	0	Bacteria|Firmicutes|Clostridia|Clostridiales|Lachnospiraceae|Coprococcus
355089	#N/A	#N/A	#N/A	#N/A	#N/A	#N/A	#N/A	#N/A	#N/A	1	0	0	0	0	0	0	0	0	0	0	0	0	0	0	0	0	0	0	0	0	0	0	0	Bacteria|Firmicutes|Bacilli|Lactobacillales|Lactobacillaceae|Lactobacillus
398255	#N/A	#N/A	#N/A	22	-0.353553	0	50	0	0	236	299	324	495	468	495	715	329	250	1159	408	560	418	414	580	656	335	533	696	848	412	331	483	445	Bacteria|Bacteroidetes|Bacteroidia|Bacteroidales|S24-7
114538	#N/A	#N/A	#N/A	#N/A	#N/A	#N/A	#N/A	#N/A	#N/A	0	1	0	0	0	0	0	1	0	0	0	1	0	1	0	0	0	0	2	0	0	0	1	0	Bacteria|Firmicutes|Bacilli|Lactobacillales|Streptococcaceae|Lactococcus
273199	#N/A	#N/A	#N/A	#N/A	#N/A	#N/A	#N/A	#N/A	#N/A	0	0	0	0	0	0	0	1	0	0	0	0	0	0	0	0	1	0	0	1	0	0	1	0	Bacteria|Firmicutes|Clostridia|Clostridiales
197334	#N/A	#N/A	#N/A	#N/A	#N/A	#N/A	#N/A	#N/A	#N/A	0	0	0	0	0	0	0	0	0	0	1	0	0	0	0	0	0	0	0	0	0	0	0	0	Bacteria|Firmicutes|Clostridia|Clostridiales|Lachnospiraceae
330772	7	-0.250982	0	1	-0.237775	0.5	2	-0.0692178	0	3685	6007	4158	4695	4666	1523	4326	2331	273	11505	4117	6611	8143	4982	3732	3413	3194	3000	6824	7805	2337	2536	2724	1911	Bacteria|Bacteroidetes|Bacteroidia|Bacteroidales|S24-7
197331	#N/A	#N/A	#N/A	#N/A	#N/A	#N/A	#N/A	#N/A	#N/A	0	0	0	0	0	1	0	0	0	0	0	0	0	0	0	0	1	0	0	0	0	0	0	0	Bacteria|Firmicutes|Clostridia|Clostridiales
847228	#N/A	#N/A	#N/A	#N/A	#N/A	#N/A	#N/A	#N/A	#N/A	0	0	0	0	0	1	0	0	0	0	0	0	0	0	0	0	0	0	0	0	0	0	0	0	Bacteria|Bacteroidetes|Bacteroidia|Bacteroidales|Porphyromonadaceae|Parabacteroides
161007	#N/A	#N/A	#N/A	#N/A	#N/A	#N/A	#N/A	#N/A	#N/A	0	0	0	0	0	0	0	0	0	0	0	0	0	0	0	0	0	0	0	0	0	1	0	0	Bacteria|Bacteroidetes|Bacteroidia|Bacteroidales|Bacteroidaceae|Bacteroides
4278525	#N/A	#N/A	#N/A	#N/A	#N/A	#N/A	#N/A	#N/A	#N/A	0	0	0	0	0	0	1	0	0	0	0	0	0	0	0	0	0	0	0	0	0	0	0	0	Bacteria|Bacteroidetes|Bacteroidia|Bacteroidales|Bacteroidaceae|Bacteroides
194225	20	-1.23443	0	#N/A	#N/A	#N/A	6	0.729158	0.32	0	3	10	0	0	3	11	1	0	13	0	34	0	0	21	6	0	13	17	26	4	0	0	12	Bacteria|Bacteroidetes|Bacteroidia|Bacteroidales|S24-7
308042	5	0.208514	0	#N/A	#N/A	#N/A	#N/A	#N/A	#N/A	1	4	2	0	0	0	1	1	0	0	1	5	0	0	0	0	1	1	4	2	0	0	6	1	Bacteria|Firmicutes|Clostridia|Clostridiales|Lachnospiraceae|[Ruminococcus]|gnavus
318470	#N/A	#N/A	#N/A	#N/A	#N/A	#N/A	#N/A	#N/A	#N/A	0	0	0	0	1	0	0	1	0	0	0	0	0	0	1	1	0	0	0	0	0	0	0	0	Bacteria|Firmicutes|Clostridia|Clostridiales
259870	#N/A	#N/A	#N/A	#N/A	#N/A	#N/A	#N/A	#N/A	#N/A	0	0	0	0	0	0	0	0	0	0	0	0	0	0	0	0	0	0	0	0	0	72	0	0	Bacteria|Firmicutes|Clostridia|Clostridiales
541761	#N/A	#N/A	#N/A	#N/A	#N/A	#N/A	#N/A	#N/A	#N/A	0	0	0	0	0	0	0	0	0	0	1	0	0	0	0	0	0	0	0	0	0	0	0	0	Bacteria|Proteobacteria|Alphaproteobacteria|Rhizobiales|Hyphomicrobiaceae|Hyphomicrobium
228730	#N/A	#N/A	#N/A	1	-1.01055	0	8	-0.408248	0	33	32	90	49	54	38	142	81	33	227	114	161	146	176	77	30	287	93	141	300	292	56	218	131	Bacteria|Bacteroidetes|Bacteroidia|Bacteroidales|S24-7
4355971	#N/A	#N/A	#N/A	#N/A	#N/A	#N/A	#N/A	#N/A	#N/A	0	0	0	0	0	0	0	0	0	0	0	0	1	0	0	0	0	0	0	0	0	0	0	0	Bacteria|Firmicutes|Clostridia|Clostridiales
180221	#N/A	#N/A	#N/A	#N/A	#N/A	#N/A	#N/A	#N/A	#N/A	0	0	0	0	0	0	0	0	0	0	1	0	0	0	0	0	0	0	0	0	0	0	0	0	Bacteria|Firmicutes|Clostridia|Clostridiales|Lachnospiraceae|[Ruminococcus]|gnavus
405780	12	0.164577	0	16	1.22474	0	12	0.0578315	0.375	2	82	44	12	162	4	18	2	0	2	43	2	15	29	90	1	0	1	0	9	0	0	121	15	Bacteria|Firmicutes|Clostridia|Clostridiales|Ruminococcaceae|Ruminococcus
209408	#N/A	#N/A	#N/A	#N/A	#N/A	#N/A	#N/A	#N/A	#N/A	0	0	0	0	0	0	0	0	0	0	0	0	0	0	0	0	0	0	0	0	0	0	2	0	Bacteria|Bacteroidetes|Bacteroidia|Bacteroidales|S24-7
446135	13	0	0	#N/A	#N/A	#N/A	18	0.408248	0	45	2	1	25	1	95	35	40	38	68	64	99	24	42	98	32	212	107	109	117	0	2	72	5	Bacteria|Firmicutes|Clostridia|Clostridiales|Ruminococcaceae|Oscillospira
341902	#N/A	#N/A	#N/A	#N/A	#N/A	#N/A	9	1.24846	0	3	1	0	0	1	0	1	0	0	4	3	0	3	0	0	0	0	0	0	1	3	0	1	2	Bacteria|Firmicutes|Clostridia|Clostridiales|Ruminococcaceae|Oscillospira
261664	#N/A	#N/A	#N/A	#N/A	#N/A	#N/A	#N/A	#N/A	#N/A	0	0	0	0	0	0	0	0	0	0	1	0	0	0	0	0	0	0	0	0	2	0	0	0	Bacteria|Firmicutes|Clostridia|Clostridiales
2272791	#N/A	#N/A	#N/A	#N/A	#N/A	#N/A	#N/A	#N/A	#N/A	0	0	0	0	0	0	0	0	0	0	0	0	0	0	0	0	1	0	0	0	0	0	0	0	Bacteria|Firmicutes|Clostridia|Clostridiales|Clostridiaceae
308136	49	0	0	#N/A	#N/A	#N/A	9	-1.07011	0	0	0	1	0	2	2	0	1	2	0	1	0	0	0	2	0	5	1	0	1	1	1	1	1	Bacteria|Firmicutes|Clostridia|Clostridiales|Ruminococcaceae|Oscillospira
336872	#N/A	#N/A	#N/A	#N/A	#N/A	#N/A	#N/A	#N/A	#N/A	0	3	0	1	0	0	0	1	0	0	0	0	0	0	0	0	1	0	0	1	0	0	2	0	Bacteria|Firmicutes|Clostridia|Clostridiales|Lachnospiraceae|[Ruminococcus]|gnavus
310407	#N/A	#N/A	#N/A	#N/A	#N/A	#N/A	#N/A	#N/A	#N/A	0	0	0	0	0	0	0	0	0	0	0	0	0	0	0	0	1	0	0	1	0	0	0	0	Bacteria|Firmicutes|Clostridia|Clostridiales
330564	#N/A	#N/A	#N/A	25	-0.5	0	#N/A	#N/A	#N/A	6	0	0	0	1	0	7	0	0	23	4	0	0	1	1	0	0	0	0	0	0	8	0	0	Bacteria|Firmicutes|Clostridia|Clostridiales|Lachnospiraceae|[Ruminococcus]|gnavus
355246	#N/A	#N/A	#N/A	6	1.64157	0.277778	1	1.37217	0	853	522	1001	1554	591	1	1825	807	8	782	3	863	2411	971	589	132	235	2848	2038	1455	452	961	684	200	Bacteria|Bacteroidetes|Bacteroidia|Bacteroidales|[Odoribacteraceae]|Butyricimonas
276125	#N/A	#N/A	#N/A	#N/A	#N/A	#N/A	#N/A	#N/A	#N/A	0	0	0	0	0	0	0	0	0	0	0	0	0	17	0	0	6	0	18	7	0	0	0	0	Bacteria|Firmicutes|Clostridia|Clostridiales
3029968	#N/A	#N/A	#N/A	#N/A	#N/A	#N/A	#N/A	#N/A	#N/A	0	3	0	0	0	0	0	0	0	0	0	2	2	3	0	0	0	0	0	2	0	1	0	1	Bacteria|Firmicutes|Clostridia|Clostridiales|Lachnospiraceae
266946	5	1.04257	0	#N/A	#N/A	#N/A	#N/A	#N/A	#N/A	0	7	4	0	0	0	2	1	0	0	2	4	0	0	0	0	0	1	4	0	0	0	4	0	Bacteria|Firmicutes|Clostridia|Clostridiales|Lachnospiraceae|[Ruminococcus]|gnavus
4289858	#N/A	#N/A	#N/A	#N/A	#N/A	#N/A	#N/A	#N/A	#N/A	0	0	0	0	0	0	1	0	0	0	0	0	0	0	0	0	0	0	0	0	0	0	0	0	Bacteria|Firmicutes|Clostridia|Clostridiales|Clostridiaceae
397444	#N/A	#N/A	#N/A	#N/A	#N/A	#N/A	#N/A	#N/A	#N/A	0	0	0	0	0	0	0	0	0	0	0	0	1	0	0	0	0	1	1	0	1	0	0	0	Bacteria|Firmicutes|Clostridia|Clostridiales|Ruminococcaceae
277293	#N/A	#N/A	#N/A	#N/A	#N/A	#N/A	6	-0.410152	0	0	0	0	0	2	4	0	0	0	0	0	0	0	0	0	0	0	0	0	5	1	1	5	0	Bacteria|Firmicutes|Clostridia|Clostridiales
43950	#N/A	#N/A	#N/A	#N/A	#N/A	#N/A	#N/A	#N/A	#N/A	0	0	0	1	0	0	0	0	0	0	0	0	0	0	0	0	0	0	0	0	0	0	0	0	Bacteria|Firmicutes|Clostridia|Clostridiales|Ruminococcaceae|Oscillospira
260931	#N/A	#N/A	#N/A	#N/A	#N/A	#N/A	21	0.707107	0	0	0	0	2	0	0	0	0	0	0	0	0	1	0	1	0	0	1	2	1	0	0	1	0	Bacteria|Firmicutes|Clostridia|Clostridiales|Ruminococcaceae|Oscillospira
261402	#N/A	#N/A	#N/A	#N/A	#N/A	#N/A	9	-1.07011	0	6	1	0	1	1	0	4	2	3	0	0	0	0	0	2	8	6	1	13	1	1	2	1	1	Bacteria|Firmicutes|Erysipelotrichi|Erysipelotrichales|Erysipelotrichaceae|Allobaculum
261799	#N/A	#N/A	#N/A	#N/A	#N/A	#N/A	#N/A	#N/A	#N/A	0	0	0	0	0	0	0	0	0	0	0	0	1	0	0	0	0	0	0	0	0	0	0	0	Bacteria|Firmicutes|Clostridia|Clostridiales|Ruminococcaceae
326701	#N/A	#N/A	#N/A	#N/A	#N/A	#N/A	9	0.0891756	0	0	4	0	0	0	1	3	0	0	0	3	1	0	0	0	1	3	2	3	0	0	1	1	0	Bacteria|Firmicutes|Clostridia|Clostridiales
410242	#N/A	#N/A	#N/A	#N/A	#N/A	#N/A	#N/A	#N/A	#N/A	0	0	0	0	0	1	0	0	0	0	0	0	0	0	0	0	0	0	0	0	0	0	0	0	Bacteria|Firmicutes|Clostridia|Clostridiales|Christensenellaceae
327656	#N/A	#N/A	#N/A	#N/A	#N/A	#N/A	#N/A	#N/A	#N/A	0	0	0	0	1	0	1	0	0	1	1	0	0	0	0	0	0	0	1	0	0	0	0	0	Bacteria|Firmicutes|Clostridia|Clostridiales
193509	8	-1.03078	0	#N/A	#N/A	#N/A	10	-0.773137	0	0	0	4	1	2	0	0	5	0	2	4	44	12	0	8	3	102	3	21	0	1	0	9	0	Bacteria|Firmicutes|Clostridia|Clostridiales|Lachnospiraceae|Dorea
259251	#N/A	#N/A	#N/A	#N/A	#N/A	#N/A	#N/A	#N/A	#N/A	0	1	0	0	0	1	0	0	0	2	0	0	0	0	0	0	0	0	0	0	0	0	1	0	Bacteria|Firmicutes|Clostridia|Clostridiales
320972	#N/A	#N/A	#N/A	#N/A	#N/A	#N/A	#N/A	#N/A	#N/A	0	0	0	0	0	0	0	0	0	0	1	0	0	0	0	0	0	0	1	0	0	0	0	0	Bacteria|Firmicutes|Clostridia|Clostridiales|Ruminococcaceae
593803	#N/A	#N/A	#N/A	#N/A	#N/A	#N/A	#N/A	#N/A	#N/A	0	0	0	0	0	0	0	0	0	1	1	1	0	0	0	0	0	0	0	0	0	0	0	0	Bacteria|Firmicutes|Bacilli|Lactobacillales|Streptococcaceae|Streptococcus
298163	30	-0.57735	0	0	-0.544331	0	#N/A	#N/A	#N/A	0	0	0	1	9	8	2	2	1	3	4	3	0	0	3	0	0	3	2	6	1	6	4	2	Bacteria|Firmicutes|Clostridia|Clostridiales|Ruminococcaceae|Oscillospira
780650	#N/A	#N/A	#N/A	11	-1.09322	0	18	0.408248	0	0	731	2	1731	405	1	1203	160	1	2	1	2	3	0	75	0	437	0	1	6	0	0	39	0	Bacteria|Firmicutes|Clostridia|Clostridiales|Clostridiaceae
579452	#N/A	#N/A	#N/A	#N/A	#N/A	#N/A	#N/A	#N/A	#N/A	0	1	0	2	0	0	0	0	0	0	0	1	0	0	0	0	0	0	0	0	0	0	1	0	Bacteria|Firmicutes|Clostridia|Clostridiales|Lachnospiraceae|[Ruminococcus]
342014	#N/A	#N/A	#N/A	#N/A	#N/A	#N/A	#N/A	#N/A	#N/A	0	0	0	0	1	0	0	0	0	0	0	0	0	0	0	0	0	0	0	0	0	0	0	0	Bacteria|Firmicutes|Bacilli|Lactobacillales|Lactobacillaceae|Lactobacillus
178331	#N/A	#N/A	#N/A	#N/A	#N/A	#N/A	#N/A	#N/A	#N/A	0	0	0	0	0	0	0	0	0	0	0	0	0	0	0	0	0	0	0	0	0	0	1	0	Bacteria|Verrucomicrobia|Verrucomicrobiae|Verrucomicrobiales|Verrucomicrobiaceae|Akkermansia|muciniphila
196974	#N/A	#N/A	#N/A	#N/A	#N/A	#N/A	#N/A	#N/A	#N/A	0	1	0	0	2	0	0	0	0	0	0	0	1	0	0	0	0	0	0	0	0	0	0	0	Bacteria|Firmicutes|Clostridia|Clostridiales
192585	#N/A	#N/A	#N/A	#N/A	#N/A	#N/A	#N/A	#N/A	#N/A	0	0	0	0	1	0	0	0	0	0	0	0	0	0	0	0	0	0	0	0	0	1	0	2	Bacteria|Firmicutes|Clostridia|Clostridiales
353964	#N/A	#N/A	#N/A	#N/A	#N/A	#N/A	#N/A	#N/A	#N/A	0	0	0	0	0	0	0	0	0	0	0	0	0	0	0	0	0	0	0	1	0	0	0	0	Bacteria|Firmicutes|Clostridia|Clostridiales
686281	#N/A	#N/A	#N/A	#N/A	#N/A	#N/A	#N/A	#N/A	#N/A	0	0	0	0	0	0	0	0	0	0	0	0	0	0	0	0	0	0	1	0	0	0	0	0	Bacteria|Firmicutes|Clostridia|Clostridiales
308957	29	-0.57735	0	0	-1.22474	0.5	17	-1.14367	0.5	22	3	15	14	0	14	9	24	0	8	39	15	4	10	26	13	9	22	45	37	26	12	11	21	Bacteria|Bacteroidetes|Bacteroidia|Bacteroidales|Rikenellaceae
195476	#N/A	#N/A	#N/A	#N/A	#N/A	#N/A	#N/A	#N/A	#N/A	0	0	0	0	0	1	0	0	0	0	0	0	0	0	0	0	0	0	0	0	0	0	0	0	Bacteria|Firmicutes|Clostridia|Clostridiales
3829957	#N/A	#N/A	#N/A	#N/A	#N/A	#N/A	#N/A	#N/A	#N/A	1	0	0	0	0	0	0	0	0	1	0	0	0	0	0	0	0	0	0	0	0	0	0	0	Bacteria|Proteobacteria|Gammaproteobacteria|Enterobacteriales|Enterobacteriaceae
544847	#N/A	#N/A	#N/A	#N/A	#N/A	#N/A	#N/A	#N/A	#N/A	0	0	0	2	0	0	0	0	0	0	0	0	0	0	0	0	0	0	0	0	0	0	1	0	Bacteria|Proteobacteria|Gammaproteobacteria|Xanthomonadales|Xanthomonadaceae
806422	#N/A	#N/A	#N/A	#N/A	#N/A	#N/A	#N/A	#N/A	#N/A	0	0	0	0	1	0	0	0	0	0	0	0	0	0	0	0	0	0	0	0	0	0	0	0	Bacteria|Firmicutes|Clostridia|Clostridiales|Ruminococcaceae|Ruminococcus
345362	#N/A	#N/A	#N/A	#N/A	#N/A	#N/A	#N/A	#N/A	#N/A	0	0	1	0	0	0	0	0	0	1	0	0	0	2	0	0	0	0	0	0	0	0	0	0	Bacteria|Proteobacteria|Gammaproteobacteria|Enterobacteriales|Enterobacteriaceae
345582	#N/A	#N/A	#N/A	#N/A	#N/A	#N/A	5	0.0723954	0	1	0	0	0	0	0	0	0	1	2	0	0	0	0	0	0	2	0	0	0	1	0	1	1	Bacteria|Firmicutes|Clostridia|Clostridiales|Ruminococcaceae|Oscillospira
260205	#N/A	#N/A	#N/A	#N/A	#N/A	#N/A	#N/A	#N/A	#N/A	0	0	0	0	0	0	0	2	0	0	0	0	0	0	0	0	1	0	5	0	0	0	0	0	Bacteria|Firmicutes|Clostridia|Clostridiales
260200	1	-0.320408	0	2	-0.68313	0	2	1.28745	0	0	5	1	2	3	2	1	2	0	3	6	3	1	4	3	0	5	2	5	7	8	0	1	2	Bacteria|Firmicutes|Clostridia|Clostridiales
260753	#N/A	#N/A	#N/A	#N/A	#N/A	#N/A	#N/A	#N/A	#N/A	0	0	1	0	0	0	0	0	0	0	2	0	0	0	0	0	0	0	0	1	0	0	0	0	Bacteria|Firmicutes|Clostridia|Clostridiales|Ruminococcaceae|Oscillospira
297266	#N/A	#N/A	#N/A	#N/A	#N/A	#N/A	#N/A	#N/A	#N/A	0	0	0	0	0	0	0	0	0	0	0	0	0	0	0	0	0	0	0	0	1	0	0	0	Bacteria|Bacteroidetes|Bacteroidia|Bacteroidales|Rikenellaceae
124470	#N/A	#N/A	#N/A	3	2.64759	0.37037	5	-0.434372	0	889	669	2007	2152	589	1762	1854	1026	28	1531	1193	991	1982	995	950	1548	281	3083	2513	2146	609	1442	1982	649	Bacteria|Bacteroidetes|Bacteroidia|Bacteroidales|[Odoribacteraceae]|Butyricimonas
835900	18	-0.756329	0	#N/A	#N/A	#N/A	#N/A	#N/A	#N/A	1	2	1	1	2	2	0	0	0	0	1	0	2	0	0	0	0	0	0	0	0	0	0	0	Bacteria|Bacteroidetes|Bacteroidia|Bacteroidales|[Odoribacteraceae]|Odoribacter
1105958	#N/A	#N/A	#N/A	#N/A	#N/A	#N/A	#N/A	#N/A	#N/A	0	0	0	0	0	0	0	0	0	0	0	0	0	0	0	0	0	0	0	3	0	0	0	0	Bacteria|Firmicutes|Clostridia|Clostridiales
192475	#N/A	#N/A	#N/A	#N/A	#N/A	#N/A	7	-1.016	0	0	0	0	0	1	1	2	0	0	0	0	0	5	1	0	1	1	0	2	0	0	4	2	0	Bacteria|Firmicutes|Clostridia|Clostridiales
261337	#N/A	#N/A	#N/A	#N/A	#N/A	#N/A	2	1.96579	0.244898	0	0	0	0	0	0	0	0	3	0	0	0	0	0	2	1	1	1	2	1	1	0	0	0	Bacteria|Firmicutes|Clostridia|Clostridiales|Ruminococcaceae|Oscillospira
321821	#N/A	#N/A	#N/A	0	0.816497	0	4	0.243332	0.375	11	132	410	44	86	165	389	304	1	128	66	92	15	100	52	27	373	36	694	1248	230	182	305	33	Bacteria|Firmicutes|Clostridia|Clostridiales
261334	#N/A	#N/A	#N/A	#N/A	#N/A	#N/A	#N/A	#N/A	#N/A	0	0	0	1	0	0	2	0	0	1	0	0	0	0	0	0	0	0	0	0	0	0	0	0	Bacteria|Firmicutes|Clostridia|Clostridiales|Lachnospiraceae
414089	1	1.74445	0	#N/A	#N/A	#N/A	#N/A	#N/A	#N/A	1	31	15	5	32	18	13	18	1	20	50	9	11	35	10	11	19	15	58	50	42	9	20	17	Bacteria|Firmicutes|Clostridia|Clostridiales|Ruminococcaceae
270165	9	-1.40183	0	11	0.468521	0	2	0.609117	0	1	2	0	0	5	1	5	3	0	2	2	1	1	0	0	0	0	0	2	2	1	0	4	0	Bacteria|Firmicutes|Clostridia|Clostridiales
198753	1	-0.836622	0	4	0.576072	0.75	#N/A	#N/A	#N/A	50	674	904	73	119	450	156	152	10	454	751	71	226	321	150	216	277	92	172	139	518	760	945	430	Bacteria|Firmicutes|Clostridia|Clostridiales|Ruminococcaceae
184211	#N/A	#N/A	#N/A	#N/A	#N/A	#N/A	#N/A	#N/A	#N/A	0	0	0	0	0	0	0	0	0	0	0	0	0	2	0	0	0	4	0	0	0	0	0	0	Bacteria|Firmicutes|Clostridia|Clostridiales
270215	#N/A	#N/A	#N/A	#N/A	#N/A	#N/A	#N/A	#N/A	#N/A	0	0	0	0	1	0	0	0	0	1	2	0	6	0	0	0	1	0	0	0	14	5	0	0	Bacteria|Firmicutes|Clostridia|Clostridiales
190188	#N/A	#N/A	#N/A	#N/A	#N/A	#N/A	#N/A	#N/A	#N/A	0	0	1	0	0	0	0	0	0	0	0	0	0	0	0	0	0	0	0	0	0	0	1	0	Bacteria|Firmicutes|Clostridia|Clostridiales|Lachnospiraceae
1737536	10	0.781736	0	0	1.49691	0	10	-1.24374	0	14	14	9	9	10	16	13	4	0	11	11	18	1	0	12	6	16	4	4	30	0	0	8	5	Bacteria|Firmicutes|Clostridia|Clostridiales|Ruminococcaceae|Oscillospira
271563	#N/A	#N/A	#N/A	#N/A	#N/A	#N/A	#N/A	#N/A	#N/A	0	0	0	0	0	0	0	1	0	0	0	0	0	1	1	0	0	0	0	0	0	0	0	0	Bacteria|Firmicutes|Clostridia|Clostridiales|Ruminococcaceae|Oscillospira
168145	#N/A	#N/A	#N/A	7	-1.3125	0	#N/A	#N/A	#N/A	0	0	0	0	0	4	0	0	0	0	0	0	1	3	12	2	0	0	0	0	0	0	0	0	Bacteria|Firmicutes|Clostridia|Clostridiales|Ruminococcaceae
392887	#N/A	#N/A	#N/A	#N/A	#N/A	#N/A	#N/A	#N/A	#N/A	0	0	0	0	0	0	1	0	0	0	1	0	0	0	0	0	0	0	0	0	0	0	0	0	Bacteria|Firmicutes|Clostridia|Clostridiales|Lachnospiraceae|Roseburia
197364	#N/A	#N/A	#N/A	#N/A	#N/A	#N/A	#N/A	#N/A	#N/A	0	0	0	0	0	0	0	0	0	0	2	0	0	0	0	0	0	0	0	0	0	0	0	0	Bacteria|Firmicutes|Clostridia|Clostridiales
190219	#N/A	#N/A	#N/A	#N/A	#N/A	#N/A	#N/A	#N/A	#N/A	0	0	0	0	0	0	0	0	0	0	0	0	0	0	0	0	0	0	0	0	0	0	1	0	Bacteria|Firmicutes|Clostridia|Clostridiales
197537	2	0.0976565	0.375	3	0.773453	0.444444	6	-0.979806	0	7	6	5	6	8	6	1	3	0	6	4	6	4	5	10	7	1	8	7	12	5	17	4	4	Bacteria|Bacteroidetes|Bacteroidia|Bacteroidales|Bacteroidaceae|Bacteroides
293818	#N/A	#N/A	#N/A	#N/A	#N/A	#N/A	#N/A	#N/A	#N/A	1	0	0	0	0	0	0	0	0	0	0	0	0	0	0	0	0	0	0	0	0	0	0	0	Bacteria|Firmicutes|Clostridia|Clostridiales|Ruminococcaceae
198537	#N/A	#N/A	#N/A	#N/A	#N/A	#N/A	#N/A	#N/A	#N/A	0	0	0	0	0	0	0	0	0	0	0	0	0	0	0	0	1	0	0	0	0	0	0	0	Bacteria|Firmicutes|Clostridia|Clostridiales
182361	#N/A	#N/A	#N/A	#N/A	#N/A	#N/A	#N/A	#N/A	#N/A	0	0	0	0	0	0	0	0	0	0	0	0	0	1	0	0	0	0	0	0	0	0	0	0	Bacteria|Bacteroidetes|Bacteroidia|Bacteroidales|S24-7
322840	#N/A	#N/A	#N/A	#N/A	#N/A	#N/A	#N/A	#N/A	#N/A	0	0	0	0	1	0	1	0	0	0	0	0	0	0	0	0	1	0	0	0	0	0	0	0	Bacteria|Firmicutes|Clostridia|Clostridiales
199599	9	0.215666	0	#N/A	#N/A	#N/A	15	0	0	4	41	1	13	19	28	11	209	23	16	25	0	8	4	11	41	129	43	40	215	3	64	18	13	Bacteria|Firmicutes|Clostridia|Clostridiales
211494	#N/A	#N/A	#N/A	#N/A	#N/A	#N/A	#N/A	#N/A	#N/A	0	0	0	1	0	0	0	0	0	1	0	1	0	1	1	0	0	0	0	0	0	0	0	0	Bacteria|Bacteroidetes|Bacteroidia|Bacteroidales|S24-7
264941	#N/A	#N/A	#N/A	20	1	0	27	0	0	2	0	1	0	0	0	0	1	0	0	1	1	0	1	2	2	1	0	1	0	0	1	0	1	Bacteria|Firmicutes|Clostridia|Clostridiales|Ruminococcaceae|Oscillospira
264940	#N/A	#N/A	#N/A	#N/A	#N/A	#N/A	#N/A	#N/A	#N/A	0	0	0	0	0	0	0	0	0	0	0	0	0	0	0	0	0	0	1	0	0	1	0	0	Bacteria|Firmicutes|Erysipelotrichi|Erysipelotrichales|Erysipelotrichaceae|Allobaculum
264123	#N/A	#N/A	#N/A	#N/A	#N/A	#N/A	#N/A	#N/A	#N/A	0	0	0	0	0	0	0	0	0	0	0	0	0	0	0	0	0	0	1	0	0	0	0	0	Bacteria|Firmicutes|Bacilli|Lactobacillales|Lactobacillaceae|Lactobacillus
3392840	#N/A	#N/A	#N/A	#N/A	#N/A	#N/A	#N/A	#N/A	#N/A	0	0	0	0	0	0	0	0	0	0	0	0	0	0	0	0	1	0	0	0	0	0	0	0	Bacteria|Firmicutes|Clostridia|Clostridiales|Lachnospiraceae|Dorea
1140386	#N/A	#N/A	#N/A	#N/A	#N/A	#N/A	#N/A	#N/A	#N/A	0	0	0	0	0	0	0	0	0	0	0	0	0	0	0	0	0	0	0	1	0	0	0	0	Bacteria|Proteobacteria|Betaproteobacteria|Rhodocyclales|Rhodocyclaceae|K82
191803	#N/A	#N/A	#N/A	#N/A	#N/A	#N/A	#N/A	#N/A	#N/A	0	0	0	0	1	0	0	0	0	1	0	0	0	0	0	0	0	0	0	0	0	0	1	0	Bacteria|Firmicutes|Clostridia|Clostridiales|Clostridiaceae
270984	#N/A	#N/A	#N/A	#N/A	#N/A	#N/A	27	0	0	0	0	0	406	106	13	195	94	31	1	0	46	0	36	115	542	123	1	306	4	0	134	4	83	Bacteria|Bacteroidetes|Bacteroidia|Bacteroidales|S24-7
797021	26	-1.37281	0	1	0.534994	0.375	8	-1.22474	0	1	1	1	0	0	1	0	2	0	2	11	4	2	1	0	0	0	3	2	0	1	8	4	0	Bacteria|Firmicutes|Clostridia|Clostridiales
196753	#N/A	#N/A	#N/A	#N/A	#N/A	#N/A	#N/A	#N/A	#N/A	0	0	0	2	0	0	2	1	0	0	0	0	0	0	0	0	0	0	0	0	0	0	0	0	Bacteria|Firmicutes|Clostridia|Clostridiales|Clostridiaceae
271107	3	-0.354246	0	11	-1.09322	0	10	-0.302532	0	2	1	6	1	1	0	1	0	1	6	2	2	3	1	1	1	3	1	3	0	0	0	7	2	Bacteria|Firmicutes|Clostridia|Clostridiales
274400	#N/A	#N/A	#N/A	#N/A	#N/A	#N/A	#N/A	#N/A	#N/A	0	0	0	0	1	0	0	1	0	0	0	0	0	0	0	0	0	1	0	0	0	0	0	0	Bacteria|Firmicutes|Clostridia|Clostridiales|Lachnospiraceae|Coprococcus
2869170	#N/A	#N/A	#N/A	#N/A	#N/A	#N/A	#N/A	#N/A	#N/A	0	0	0	0	1	0	0	0	0	0	0	0	0	0	0	0	0	0	0	0	0	0	0	0	Bacteria|Firmicutes|Clostridia|Clostridiales|Clostridiaceae
175365	#N/A	#N/A	#N/A	#N/A	#N/A	#N/A	#N/A	#N/A	#N/A	0	0	0	0	0	0	1	0	0	0	1	0	0	0	1	0	0	0	0	0	0	0	0	0	Bacteria|Firmicutes|Clostridia|Clostridiales
705337	#N/A	#N/A	#N/A	#N/A	#N/A	#N/A	#N/A	#N/A	#N/A	0	0	0	0	0	0	0	727	0	0	0	0	0	0	0	0	0	0	0	0	0	0	0	0	Bacteria|Firmicutes|Clostridia|Clostridiales
278098	20	-0.308607	0	7	0.8125	0	12	-0.520483	0.444444	108	2	1	94	5	10	2	1	1	2	1	40	0	316	254	58	0	2	0	20	0	1	9	3	Bacteria|Firmicutes|Clostridia|Clostridiales|Ruminococcaceae|Ruminococcus
1134377	#N/A	#N/A	#N/A	#N/A	#N/A	#N/A	#N/A	#N/A	#N/A	0	0	0	0	0	0	0	0	0	0	0	0	0	0	0	0	0	1	0	0	0	0	0	0	Bacteria|Proteobacteria|Gammaproteobacteria|Enterobacteriales|Enterobacteriaceae|Erwinia
264546	#N/A	#N/A	#N/A	#N/A	#N/A	#N/A	#N/A	#N/A	#N/A	0	0	0	0	0	0	0	0	0	0	0	0	0	0	0	0	0	0	0	0	1	0	0	0	Bacteria|Proteobacteria|Betaproteobacteria|Burkholderiales|Alcaligenaceae|Alcaligenes|faecalis
205981	#N/A	#N/A	#N/A	#N/A	#N/A	#N/A	#N/A	#N/A	#N/A	0	0	0	0	0	0	0	0	0	0	0	0	0	0	0	0	0	0	0	0	1	0	0	0	Bacteria|Bacteroidetes|Bacteroidia|Bacteroidales|S24-7
275288	#N/A	#N/A	#N/A	#N/A	#N/A	#N/A	#N/A	#N/A	#N/A	0	0	0	0	0	0	0	0	0	0	0	1	0	0	0	0	0	0	0	1	1	0	0	0	Bacteria|Firmicutes|Clostridia|Clostridiales|Ruminococcaceae|Oscillospira
205985	37	0	0	6	-1.02598	0	33	0	0	0	1	1	2	1	0	1	1	0	1	0	4	2	2	1	1	2	0	2	9	1	0	2	1	Bacteria|Bacteroidetes|Bacteroidia|Bacteroidales|S24-7
275286	#N/A	#N/A	#N/A	#N/A	#N/A	#N/A	22	0.420084	0.32	0	0	2	0	0	0	0	0	0	0	0	0	0	862	4	37	888	4	2241	620	0	1	3	0	Bacteria|Firmicutes|Clostridia|Clostridiales
296837	#N/A	#N/A	#N/A	#N/A	#N/A	#N/A	#N/A	#N/A	#N/A	0	0	0	3	0	0	0	0	0	0	0	0	0	0	0	0	0	0	0	0	0	0	0	0	Bacteria|Firmicutes|Clostridia|Clostridiales|Clostridiaceae|Clostridium
242917	#N/A	#N/A	#N/A	#N/A	#N/A	#N/A	#N/A	#N/A	#N/A	0	0	0	0	0	1	0	0	0	0	0	0	0	0	0	0	0	0	0	0	0	0	0	0	Bacteria|Firmicutes|Bacilli|Lactobacillales|Lactobacillaceae|Lactobacillus
355630	4	-0.0980581	0	#N/A	#N/A	#N/A	#N/A	#N/A	#N/A	1	1	1	0	1	0	2	0	0	1	0	0	0	0	0	0	0	0	0	1	0	2	0	0	Bacteria|Firmicutes|Clostridia|Clostridiales
331786	#N/A	#N/A	#N/A	#N/A	#N/A	#N/A	#N/A	#N/A	#N/A	0	0	0	0	0	0	0	0	0	0	0	0	0	0	0	0	0	0	1	0	0	0	0	0	Bacteria|Firmicutes|Clostridia|Clostridiales
191974	#N/A	#N/A	#N/A	#N/A	#N/A	#N/A	#N/A	#N/A	#N/A	0	0	0	0	1	0	0	0	0	0	0	0	0	0	0	0	0	0	0	0	0	0	0	0	Bacteria|Firmicutes|Clostridia|Clostridiales
331782	#N/A	#N/A	#N/A	#N/A	#N/A	#N/A	#N/A	#N/A	#N/A	0	0	0	0	0	0	0	0	1	0	0	1	0	0	5	0	0	0	0	1	0	7	0	2	Bacteria|Firmicutes|Clostridia|Clostridiales
701221	#N/A	#N/A	#N/A	#N/A	#N/A	#N/A	#N/A	#N/A	#N/A	5	7	0	0	3	0	0	0	0	0	38	0	0	1	0	0	0	0	0	0	0	431	47	4	Bacteria|Firmicutes|Clostridia|Clostridiales|Lachnospiraceae|Roseburia
291090	#N/A	#N/A	#N/A	#N/A	#N/A	#N/A	32	0	0	2285	200	2498	1029	265	68	288	560	43	2015	2333	101	585	78	334	516	63	467	949	466	2149	583	985	475	Bacteria|Bacteroidetes|Bacteroidia|Bacteroidales|Porphyromonadaceae|Parabacteroides|distasonis
339791	16	0.534522	0	2	1.07349	0.277778	5	3.113	0	1	34	1	1	23	8	36	1	1	23	44	0	19	12	2	4	2	8	31	22	2	17	34	15	Bacteria|Firmicutes|Clostridia|Clostridiales|Lachnospiraceae|Coprococcus
264437	#N/A	#N/A	#N/A	#N/A	#N/A	#N/A	#N/A	#N/A	#N/A	1	0	0	0	1	0	0	4	1	1	1	0	0	0	0	0	4	1	0	0	0	0	0	0	Bacteria|Firmicutes|Clostridia|Clostridiales|Lachnospiraceae|Dorea
724472	#N/A	#N/A	#N/A	5	-0.410391	0.444444	6	-0.410152	0	51	265	29	30	79	130	96	167	29	84	163	198	85	114	11	84	341	103	320	40	33	148	163	90	Bacteria|Firmicutes|Clostridia|Clostridiales|Lachnospiraceae|Dorea
271106	#N/A	#N/A	#N/A	#N/A	#N/A	#N/A	10	0.638678	0.277778	1	1	0	0	0	0	0	2	0	0	0	0	0	3	0	1	1	1	3	0	0	0	1	0	Bacteria|Firmicutes|Erysipelotrichi|Erysipelotrichales|Erysipelotrichaceae|Allobaculum
175706	17	-1.1239	0	#N/A	#N/A	#N/A	7	-1.016	0	125	116	205	30	123	79	53	203	67	222	232	135	145	255	432	111	330	88	36	1460	93	50	100	415	Bacteria|Bacteroidetes|Bacteroidia|Bacteroidales|S24-7
178759	#N/A	#N/A	#N/A	#N/A	#N/A	#N/A	#N/A	#N/A	#N/A	0	0	0	0	0	1	0	0	0	0	0	0	0	0	0	0	0	0	0	0	0	0	0	0	Bacteria|Tenericutes|RF3|ML615J-28
333807	45	0	0	3	-0.475971	0	8	1.22474	0	2	0	1	0	1	1	3	4	0	3	4	2	2	24	0	3	2	0	10	0	1	1	1	0	Bacteria|Firmicutes|Clostridia|Clostridiales|Lachnospiraceae
330301	#N/A	#N/A	#N/A	#N/A	#N/A	#N/A	#N/A	#N/A	#N/A	0	0	0	0	1	0	0	0	0	0	0	0	0	0	0	1	0	0	0	0	0	3	0	1	Bacteria|Firmicutes|Bacilli|Lactobacillales|Lactobacillaceae|Lactobacillus
356455	#N/A	#N/A	#N/A	#N/A	#N/A	#N/A	#N/A	#N/A	#N/A	1	0	0	0	0	1	0	3	0	0	0	1	0	0	0	1	1	6	2	0	0	0	0	0	Bacteria|Firmicutes|Clostridia|Clostridiales
178751	#N/A	#N/A	#N/A	#N/A	#N/A	#N/A	#N/A	#N/A	#N/A	0	1	0	0	0	0	0	0	0	0	1	0	0	0	0	0	0	0	0	0	0	0	0	0	Bacteria|Firmicutes|Clostridia|Clostridiales|Lachnospiraceae|Roseburia
4416659	#N/A	#N/A	#N/A	#N/A	#N/A	#N/A	#N/A	#N/A	#N/A	0	0	0	0	0	0	0	0	0	0	0	0	0	0	0	0	0	0	0	5	0	0	0	0	Bacteria|Firmicutes|Bacilli|Lactobacillales|Lactobacillaceae|Lactobacillus
179930	#N/A	#N/A	#N/A	#N/A	#N/A	#N/A	#N/A	#N/A	#N/A	0	0	0	2	2	0	1	0	0	0	0	0	0	0	0	0	0	0	0	0	0	0	0	0	Bacteria|Firmicutes|Clostridia|Clostridiales|Clostridiaceae|Clostridium
192878	#N/A	#N/A	#N/A	#N/A	#N/A	#N/A	#N/A	#N/A	#N/A	0	0	0	0	0	0	0	0	0	0	0	0	1	0	0	0	1	0	0	0	0	0	0	0	Bacteria|Firmicutes|Clostridia|Clostridiales|Lachnospiraceae|Coprococcus
184122	#N/A	#N/A	#N/A	#N/A	#N/A	#N/A	#N/A	#N/A	#N/A	0	0	0	0	0	0	0	0	0	0	0	0	0	0	1	0	0	0	0	0	0	0	0	0	Bacteria|Firmicutes|Clostridia|Clostridiales
361170	#N/A	#N/A	#N/A	#N/A	#N/A	#N/A	#N/A	#N/A	#N/A	0	1	0	0	0	0	0	0	0	0	0	0	0	0	0	0	0	0	0	0	0	0	0	0	Bacteria|Proteobacteria|Deltaproteobacteria|Desulfovibrionales|Desulfovibrionaceae|Bilophila
213885	#N/A	#N/A	#N/A	#N/A	#N/A	#N/A	#N/A	#N/A	#N/A	0	1	0	0	0	0	0	0	0	0	0	0	0	0	1	0	0	0	0	0	0	0	0	0	Bacteria|Firmicutes|Clostridia|Clostridiales|Ruminococcaceae|Oscillospira
4308591	#N/A	#N/A	#N/A	#N/A	#N/A	#N/A	#N/A	#N/A	#N/A	2	0	3	0	0	0	2	0	0	0	1	1	0	0	0	0	0	0	0	0	1	0	0	0	Bacteria|Bacteroidetes|Bacteroidia|Bacteroidales|Porphyromonadaceae|Parabacteroides
550814	#N/A	#N/A	#N/A	#N/A	#N/A	#N/A	#N/A	#N/A	#N/A	0	0	0	0	0	0	0	0	0	0	0	0	1	0	0	0	0	0	0	0	0	0	0	0	Bacteria|Bacteroidetes|Bacteroidia|Bacteroidales|Bacteroidaceae|Bacteroides
463794	2	-0.990516	0	38	0	0	32	0	0	131	388	75	226	101	189	49	191	122	352	125	167	89	113	58	128	464	122	250	72	12	77	202	48	Bacteria|Firmicutes|Bacilli|Lactobacillales|Lactobacillaceae|Lactobacillus
267045	#N/A	#N/A	#N/A	#N/A	#N/A	#N/A	#N/A	#N/A	#N/A	0	0	0	0	0	0	0	0	0	0	0	0	0	0	0	0	0	0	4	0	0	0	0	0	Bacteria|Bacteroidetes|Bacteroidia|Bacteroidales|S24-7
267042	#N/A	#N/A	#N/A	#N/A	#N/A	#N/A	#N/A	#N/A	#N/A	0	0	0	0	0	1	0	0	0	0	0	0	0	0	0	0	0	2	0	5	0	0	0	1	Bacteria|Firmicutes|Clostridia|Clostridiales|Ruminococcaceae|Ruminococcus
267041	#N/A	#N/A	#N/A	#N/A	#N/A	#N/A	#N/A	#N/A	#N/A	0	0	0	0	0	1	0	0	0	0	0	0	0	0	0	0	0	0	0	0	0	0	0	0	Bacteria|Firmicutes|Clostridia|Clostridiales|Ruminococcaceae
529258	#N/A	#N/A	#N/A	#N/A	#N/A	#N/A	#N/A	#N/A	#N/A	0	0	0	0	0	0	0	0	0	0	0	0	1	0	0	0	0	0	0	0	0	0	0	0	Bacteria|Firmicutes|Clostridia|Clostridiales
606927	28	-0.57735	0	#N/A	#N/A	#N/A	#N/A	#N/A	#N/A	0	2	1	1	4	2	0	0	0	1	0	0	2	0	0	0	2	0	3	0	0	0	0	0	Bacteria|Firmicutes|Clostridia|Clostridiales|Peptostreptococcaceae|[Clostridium]|difficile
186464	6	0.0879316	0	#N/A	#N/A	#N/A	#N/A	#N/A	#N/A	1	2	1	0	1	1	0	0	0	0	0	1	0	0	0	0	0	0	2	0	2	0	1	0	Bacteria|Firmicutes|Clostridia|Clostridiales
262272	#N/A	#N/A	#N/A	#N/A	#N/A	#N/A	#N/A	#N/A	#N/A	0	0	0	0	0	0	0	0	0	0	0	1	1	0	0	0	0	0	0	0	0	0	0	0	Bacteria|Firmicutes|Clostridia|Clostridiales|Lachnospiraceae
188735	#N/A	#N/A	#N/A	#N/A	#N/A	#N/A	#N/A	#N/A	#N/A	0	0	0	0	0	0	0	0	0	0	0	0	0	0	0	0	0	0	0	0	1	0	0	0	Bacteria|Bacteroidetes|Bacteroidia|Bacteroidales|Bacteroidaceae|Bacteroides
730437	#N/A	#N/A	#N/A	#N/A	#N/A	#N/A	#N/A	#N/A	#N/A	0	0	4	0	0	0	0	0	0	0	1	0	1	0	0	0	0	0	0	0	0	1	0	0	Bacteria|Proteobacteria|Deltaproteobacteria|Desulfovibrionales|Desulfovibrionaceae|Bilophila
2265722	#N/A	#N/A	#N/A	#N/A	#N/A	#N/A	#N/A	#N/A	#N/A	0	0	0	0	0	1	1	0	0	0	0	0	0	0	0	0	0	0	0	0	0	0	1	0	Bacteria|Firmicutes|Clostridia|Clostridiales
270866	54	0	0	#N/A	#N/A	#N/A	4	0.243332	0	21	12	4	15	0	27	15	18	12	47	39	38	8	30	101	5	62	39	70	12	34	0	37	24	Bacteria|Firmicutes|Clostridia|Clostridiales|Ruminococcaceae|Oscillospira
272210	#N/A	#N/A	#N/A	#N/A	#N/A	#N/A	#N/A	#N/A	#N/A	1	0	0	0	0	0	0	0	0	0	0	0	0	0	0	0	0	0	0	0	0	0	0	0	Bacteria|Firmicutes|Clostridia|Clostridiales|Ruminococcaceae
217096	#N/A	#N/A	#N/A	#N/A	#N/A	#N/A	#N/A	#N/A	#N/A	0	0	0	0	0	0	0	0	0	0	0	0	0	0	0	0	0	0	2	0	0	0	0	0	Bacteria|Bacteroidetes|Bacteroidia|Bacteroidales|S24-7
272213	#N/A	#N/A	#N/A	#N/A	#N/A	#N/A	#N/A	#N/A	#N/A	0	1	0	0	0	0	0	0	0	0	1	0	0	0	0	1	1	0	3	0	0	0	1	0	Bacteria|Firmicutes|Clostridia|Clostridiales|Ruminococcaceae
245595	#N/A	#N/A	#N/A	#N/A	#N/A	#N/A	1	-0.41165	0.444444	2	5	3	4	10	3	9	2	1	19	3	12	10	4	5	5	6	3	5	5	3	4	3	0	Bacteria|Bacteroidetes|Bacteroidia|Bacteroidales|S24-7
4420570	#N/A	#N/A	#N/A	#N/A	#N/A	#N/A	#N/A	#N/A	#N/A	0	0	0	0	0	0	0	0	0	1	0	0	0	0	0	0	0	0	0	0	0	0	0	0	Bacteria|Cyanobacteria|Chloroplast|Streptophyta
303027	#N/A	#N/A	#N/A	#N/A	#N/A	#N/A	#N/A	#N/A	#N/A	0	0	0	0	2	0	1	0	0	0	1	0	0	1	1	0	0	1	0	1	0	0	0	1	Bacteria|Firmicutes|Clostridia|Clostridiales|Lachnospiraceae
267221	#N/A	#N/A	#N/A	#N/A	#N/A	#N/A	#N/A	#N/A	#N/A	0	0	0	0	0	0	0	0	0	0	0	0	0	0	0	0	0	0	0	1	0	0	0	0	Bacteria|Firmicutes|Clostridia|Clostridiales
263272	#N/A	#N/A	#N/A	#N/A	#N/A	#N/A	4	-1.00037	0	0	5	2	1	2	0	0	1	1	0	3	2	0	0	0	0	1	0	2	2	0	5	0	3	Bacteria|Firmicutes|Clostridia|Clostridiales|Ruminococcaceae|Ruminococcus
189730	12	-0.888716	0	3	-1.10068	0	13	-0.125988	0	2	4	3	2	1	2	1	2	0	5	6	3	1	1	0	2	0	0	3	8	0	3	1	0	Bacteria|Bacteroidetes|Bacteroidia|Bacteroidales|S24-7
338222	#N/A	#N/A	#N/A	#N/A	#N/A	#N/A	#N/A	#N/A	#N/A	0	2	0	1	0	0	0	0	0	0	0	0	0	0	0	0	0	0	0	0	0	0	0	0	Bacteria|Firmicutes|Clostridia|Clostridiales|Clostridiaceae
425968	#N/A	#N/A	#N/A	#N/A	#N/A	#N/A	#N/A	#N/A	#N/A	0	0	0	0	0	0	0	0	0	0	0	0	0	0	0	0	1	0	0	0	0	0	0	0	Bacteria|Bacteroidetes|Flavobacteriia|Flavobacteriales|Flavobacteriaceae|Flavobacterium
383992	#N/A	#N/A	#N/A	#N/A	#N/A	#N/A	#N/A	#N/A	#N/A	0	0	0	0	0	1	1	0	0	0	0	2	0	0	0	0	0	0	0	2	0	0	2	0	Bacteria|Firmicutes|Clostridia|Clostridiales
172403	#N/A	#N/A	#N/A	#N/A	#N/A	#N/A	#N/A	#N/A	#N/A	0	0	0	1	0	0	0	1	0	0	0	0	0	0	2	0	0	1	1	0	0	0	0	0	Bacteria|Firmicutes|Clostridia|Clostridiales|Ruminococcaceae|Oscillospira
189288	#N/A	#N/A	#N/A	#N/A	#N/A	#N/A	#N/A	#N/A	#N/A	0	0	0	0	0	0	1	0	0	1	1	0	0	0	0	0	0	0	0	0	0	0	0	0	Bacteria|Firmicutes|Clostridia|Clostridiales|Lachnospiraceae
337080	#N/A	#N/A	#N/A	#N/A	#N/A	#N/A	22	0.420084	0	1	0	0	0	0	0	0	1	0	0	0	0	0	0	0	1	0	1	0	1	0	1	1	0	Bacteria|Firmicutes|Clostridia|Clostridiales|Lachnospiraceae|Blautia
177621	#N/A	#N/A	#N/A	#N/A	#N/A	#N/A	#N/A	#N/A	#N/A	0	0	0	0	0	0	0	0	0	0	0	0	0	0	0	0	0	0	1	0	0	0	0	0	Bacteria|Firmicutes|Clostridia|Clostridiales|Lachnospiraceae
268043	#N/A	#N/A	#N/A	7	-0.25	0.444444	#N/A	#N/A	#N/A	4	0	0	4	0	1	0	0	0	0	0	1	0	12	49	5	0	0	0	0	0	0	0	0	Bacteria|Firmicutes|Clostridia|Clostridiales|Ruminococcaceae|Ruminococcus
197980	18	-0.403376	0	9	-0.592739	0	30	0	0	9	1	2	7	4	2	4	0	0	1	3	1	8	3	2	4	8	8	4	8	4	0	1	4	Bacteria|Bacteroidetes|Bacteroidia|Bacteroidales|S24-7
350127	#N/A	#N/A	#N/A	#N/A	#N/A	#N/A	#N/A	#N/A	#N/A	0	0	0	0	0	0	0	0	0	0	0	0	0	3	0	0	0	0	0	0	0	0	0	0	Bacteria|Firmicutes|Clostridia|Clostridiales
4256470	#N/A	#N/A	#N/A	#N/A	#N/A	#N/A	#N/A	#N/A	#N/A	0	0	0	0	0	0	0	0	0	0	0	0	0	0	0	1	0	2	0	0	0	0	0	0	Bacteria|Bacteroidetes|Bacteroidia|Bacteroidales|Bacteroidaceae|Bacteroides|ovatus
352222	20	2.00594	0.34	#N/A	#N/A	#N/A	#N/A	#N/A	#N/A	0	28	25	0	0	20	31	0	0	168	48	0	0	57	0	0	0	0	0	0	0	0	0	0	Bacteria|Firmicutes|Clostridia|Clostridiales
309963	#N/A	#N/A	#N/A	#N/A	#N/A	#N/A	#N/A	#N/A	#N/A	0	0	0	0	0	0	0	0	0	0	0	0	0	0	0	0	0	2	0	0	1	0	0	0	Bacteria|Firmicutes|Clostridia|Clostridiales|Lachnospiraceae
177150	#N/A	#N/A	#N/A	8	0.36018	0	#N/A	#N/A	#N/A	0	0	0	0	0	1	1	2	4	0	0	1	3	2	2	4	4	1	0	0	1	0	0	0	Bacteria|Bacteroidetes|Bacteroidia|Bacteroidales|Bacteroidaceae|Bacteroides
277512	#N/A	#N/A	#N/A	#N/A	#N/A	#N/A	#N/A	#N/A	#N/A	0	0	0	0	0	0	0	0	0	1	0	0	1	0	0	0	0	0	0	0	0	0	0	0	Bacteria|Firmicutes|Clostridia|Clostridiales
316925	9	0.215666	0.444444	#N/A	#N/A	#N/A	1	-0.41165	0	1	6	0	1	3	4	1	3	1	1	2	1	1	1	5	1	7	8	3	3	2	3	2	1	Bacteria|Firmicutes|Clostridia|Clostridiales|Ruminococcaceae|Oscillospira
263390	#N/A	#N/A	#N/A	#N/A	#N/A	#N/A	#N/A	#N/A	#N/A	0	0	0	0	0	0	0	0	0	0	1	0	0	0	0	0	0	0	0	0	0	0	0	0	Bacteria|Firmicutes|Clostridia|Clostridiales
215495	29	1.73205	0	14	0	0	#N/A	#N/A	#N/A	2465	3701	2369	3665	5030	2792	3673	1932	581	4424	4032	7611	5571	5426	2467	2074	4200	3410	7097	12844	2725	2707	3773	2562	Bacteria|Bacteroidetes|Bacteroidia|Bacteroidales|S24-7
631764	#N/A	#N/A	#N/A	#N/A	#N/A	#N/A	#N/A	#N/A	#N/A	0	0	0	0	1	0	0	0	0	0	0	0	0	0	0	0	0	0	0	0	0	0	0	0	Bacteria|Actinobacteria|Coriobacteriia|Coriobacteriales|Coriobacteriaceae|Adlercreutzia
189190	#N/A	#N/A	#N/A	#N/A	#N/A	#N/A	#N/A	#N/A	#N/A	0	1	0	0	0	0	0	0	0	0	0	0	1	0	0	0	0	0	0	0	1	0	0	0	Bacteria|Firmicutes|Clostridia|Clostridiales
348088	0	-0.867106	0	#N/A	#N/A	#N/A	3	-0.993848	0	2	0	0	0	1	2	2	0	3	4	0	2	1	0	0	3	2	0	1	1	1	3	0	1	Bacteria|Bacteroidetes|Bacteroidia|Bacteroidales|S24-7
382220	#N/A	#N/A	#N/A	0	0.816497	0	21	0.235702	0	0	97	21	45	7	97	7	348	0	2	1	20	42	687	2	100	28	127	338	77	16	160	167	4	Bacteria|Firmicutes|Clostridia|Clostridiales
185743	#N/A	#N/A	#N/A	#N/A	#N/A	#N/A	#N/A	#N/A	#N/A	0	0	0	0	0	0	0	0	0	1	1	0	0	0	0	0	0	0	0	0	0	0	0	0	Bacteria|Firmicutes|Clostridia|Clostridiales
331013	#N/A	#N/A	#N/A	9	-0.833271	0	1	0.182956	0	2	12	4	2	6	8	6	6	0	4	8	2	10	8	3	3	4	6	9	5	2	13	2	0	Bacteria|Firmicutes|Clostridia|Clostridiales|Ruminococcaceae|Ruminococcus
581933	#N/A	#N/A	#N/A	#N/A	#N/A	#N/A	3	-0.993848	0	6	8	2	4	3	4	2	4	7	5	1	6	4	2	2	1	6	10	10	5	0	0	4	2	Bacteria|Firmicutes|Clostridia|Clostridiales|Ruminococcaceae|Oscillospira
4378740	6	1.43622	0	#N/A	#N/A	#N/A	2	-1.42589	0	16	9	22	3	23	22	30	0	2	14	0	20	48	20	27	17	0	0	28	49	18	0	8	15	Bacteria|Bacteroidetes|Bacteroidia|Bacteroidales|Prevotellaceae|Prevotella
4420206	#N/A	#N/A	#N/A	#N/A	#N/A	#N/A	#N/A	#N/A	#N/A	0	1	0	0	3	0	0	0	0	1	2	0	0	0	0	0	0	0	0	0	0	0	1	1	Bacteria|Firmicutes|Clostridia|Clostridiales|Ruminococcaceae|Oscillospira
444987	17	-0.561951	0	0	-1.22474	0.666667	#N/A	#N/A	#N/A	6	17	12	1	44	16	19	15	0	27	7	4	5	0	4	13	15	10	20	26	1	45	18	48	Bacteria|Firmicutes|Clostridia|Clostridiales
186886	#N/A	#N/A	#N/A	#N/A	#N/A	#N/A	#N/A	#N/A	#N/A	0	1	1	0	0	0	0	1	0	0	0	1	0	0	0	0	0	1	1	0	1	0	0	0	Bacteria|Firmicutes|Clostridia|Clostridiales|Ruminococcaceae
305250	6	0.0879316	0	#N/A	#N/A	#N/A	#N/A	#N/A	#N/A	1	2	5	0	1	1	0	4	0	0	2	0	0	1	0	0	0	0	0	0	0	4	0	0	Bacteria|Firmicutes|Clostridia|Clostridiales|Ruminococcaceae
1109539	#N/A	#N/A	#N/A	#N/A	#N/A	#N/A	#N/A	#N/A	#N/A	0	0	0	0	0	1	0	0	0	0	0	0	0	0	0	0	0	0	0	0	2	0	0	0	Bacteria|Firmicutes|Clostridia|Clostridiales|Lachnospiraceae
260322	52	0	0	20	-1	0	3	-0.214886	0.444444	2	0	4	1	4	2	0	3	0	0	3	7	0	7	1	1	1	4	6	1	0	0	1	1	Bacteria|Firmicutes|Clostridia|Clostridiales|Ruminococcaceae
592616	#N/A	#N/A	#N/A	#N/A	#N/A	#N/A	#N/A	#N/A	#N/A	0	0	0	1	0	0	4	6	0	2	0	0	0	0	0	0	0	0	0	0	1	3	5	0	Bacteria|Firmicutes|Erysipelotrichi|Erysipelotrichales|Erysipelotrichaceae
372368	#N/A	#N/A	#N/A	36	0	0	4	-1.00037	0	2	1	0	6	1	3	4	3	12	7	0	4	0	2	4	5	1	4	1	1	9	1	0	5	Bacteria|Bacteroidetes|Bacteroidia|Bacteroidales|S24-7
1104817	8	0	0	46	0	0	11	-1.16667	0	4	0	7	6	8	0	14	0	0	5	0	0	1	4	4	0	0	0	11	4	0	0	6	2	Bacteria|Firmicutes|Clostridia|Clostridiales
320490	#N/A	#N/A	#N/A	#N/A	#N/A	#N/A	#N/A	#N/A	#N/A	0	0	0	0	0	0	0	0	0	0	0	0	0	0	0	0	0	0	4	4	0	0	0	0	Bacteria|Firmicutes|Clostridia|Clostridiales
261505	#N/A	#N/A	#N/A	#N/A	#N/A	#N/A	#N/A	#N/A	#N/A	0	0	0	0	0	0	0	0	0	0	0	0	0	0	0	0	0	0	2	0	0	0	0	0	Bacteria|Firmicutes|Erysipelotrichi|Erysipelotrichales|Erysipelotrichaceae|Allobaculum
187841	20	1.08012	0	1	-1.01055	0	#N/A	#N/A	#N/A	0	2	3	0	0	1	1	0	0	2	0	0	2	4	2	1	0	2	0	1	0	0	0	0	Bacteria|Bacteroidetes|Bacteroidia|Bacteroidales|Bacteroidaceae|Bacteroides
274893	#N/A	#N/A	#N/A	#N/A	#N/A	#N/A	#N/A	#N/A	#N/A	0	1	0	0	0	1	0	0	0	1	0	0	0	0	0	0	0	0	0	0	0	0	0	0	Bacteria|Firmicutes|Clostridia|Clostridiales|Peptostreptococcaceae
259132	#N/A	#N/A	#N/A	#N/A	#N/A	#N/A	#N/A	#N/A	#N/A	0	0	0	0	0	0	0	0	0	0	0	0	1	0	0	0	0	0	0	0	0	0	0	0	Bacteria|Firmicutes|Clostridia|Clostridiales|Lachnospiraceae|[Ruminococcus]|gnavus
166869	#N/A	#N/A	#N/A	#N/A	#N/A	#N/A	#N/A	#N/A	#N/A	0	0	0	0	0	0	0	0	0	0	0	0	0	0	0	1	0	0	0	0	0	0	0	0	Bacteria|Firmicutes|Clostridia|Clostridiales
348404	#N/A	#N/A	#N/A	#N/A	#N/A	#N/A	#N/A	#N/A	#N/A	0	0	0	0	0	0	0	0	0	0	0	0	0	0	0	0	0	0	25	0	0	0	0	0	Bacteria|Firmicutes|Clostridia|Clostridiales
270519	#N/A	#N/A	#N/A	#N/A	#N/A	#N/A	5	-0.94114	0	2	1	2	3	1	8	4	6	27	15	1	3	1	3	6	6	17	5	7	5	13	3	9	5	Bacteria|Firmicutes|Clostridia|Clostridiales|Ruminococcaceae|Oscillospira
323614	12	0.954547	0	12	-0.801784	0	1	-0.41165	0.5	56	0	0	14	0	128	1	167	0	0	0	111	0	40	14	63	23	168	136	9	0	0	1	0	Bacteria|Firmicutes|Clostridia|Clostridiales
4331760	3	-0.354246	0	35	0	0	17	0.42135	0	68	87	140	48	108	0	328	67	92	138	97	75	94	53	85	89	106	134	264	189	174	142	163	101	Bacteria|Bacteroidetes|Bacteroidia|Bacteroidales|Rikenellaceae|Alistipes|indistinctus
320123	#N/A	#N/A	#N/A	#N/A	#N/A	#N/A	#N/A	#N/A	#N/A	2	0	0	1	0	0	0	0	0	0	0	0	0	0	1	0	1	0	1	0	0	0	0	0	Bacteria|Bacteroidetes|Bacteroidia|Bacteroidales|S24-7
439880	#N/A	#N/A	#N/A	4	-0.230429	0	0	1.79813	0	5	2	0	1	3	0	0	1	0	0	1	4	2	260	179	200	1076	476	446	932	0	2	3	3	Bacteria|Firmicutes|Clostridia|Clostridiales|Ruminococcaceae|Oscillospira
329153	#N/A	#N/A	#N/A	#N/A	#N/A	#N/A	#N/A	#N/A	#N/A	0	4	0	0	0	1	1	0	0	3	0	1	0	0	0	0	2	1	0	0	0	0	0	0	Bacteria|Firmicutes|Clostridia|Clostridiales|Peptostreptococcaceae
4430503	#N/A	#N/A	#N/A	#N/A	#N/A	#N/A	#N/A	#N/A	#N/A	0	0	1	0	0	0	0	0	0	0	2	0	0	0	0	0	0	0	0	0	0	0	0	0	Bacteria|Firmicutes|Clostridia|Clostridiales
260741	11	1.06066	0	9	-0.592739	0.5	45	0	0	9	60	38	5	48	33	35	14	2	37	53	7	13	18	25	4	7	16	6	105	14	70	73	93	Bacteria|Firmicutes|Clostridia|Clostridiales|Ruminococcaceae|Oscillospira
260215	#N/A	#N/A	#N/A	#N/A	#N/A	#N/A	#N/A	#N/A	#N/A	0	0	0	0	0	0	0	0	0	0	0	0	0	0	0	0	0	0	0	1	0	0	0	0	Bacteria|Firmicutes|Clostridia|Clostridiales|Ruminococcaceae|Oscillospira
572750	0	-0.294489	0	#N/A	#N/A	#N/A	#N/A	#N/A	#N/A	1	0	0	0	1	2	9	2	1	2	6	5	1	6	1	0	1	0	0	0	1	0	2	0	Bacteria|Proteobacteria|Gammaproteobacteria|Enterobacteriales|Enterobacteriaceae|Trabulsiella
340451	#N/A	#N/A	#N/A	#N/A	#N/A	#N/A	#N/A	#N/A	#N/A	0	0	0	0	0	0	0	0	0	0	0	0	0	0	0	0	0	0	1	0	0	0	0	0	Bacteria|Firmicutes|Clostridia|Clostridiales
327284	4	0.931552	0.375	#N/A	#N/A	#N/A	#N/A	#N/A	#N/A	239	588	515	88	531	34	344	290	2	158	27	30	135	72	6	83	138	41	884	204	438	631	563	5	Bacteria|Firmicutes|Clostridia|Clostridiales
327282	#N/A	#N/A	#N/A	#N/A	#N/A	#N/A	#N/A	#N/A	#N/A	0	0	0	0	0	0	0	0	0	0	0	0	0	0	0	0	0	0	1	0	0	0	0	0	Bacteria|Firmicutes|Clostridia|Clostridiales
173923	5	1.04257	0	#N/A	#N/A	#N/A	#N/A	#N/A	#N/A	0	1	1	0	0	0	3	1	0	0	0	0	0	0	0	0	0	0	0	1	0	0	0	0	Bacteria|Firmicutes|Clostridia|Clostridiales
329712	6	-1.26035	0	3	0.148741	0.375	2	-0.0692178	0	15	11	9	6	14	16	4	10	0	16	13	15	9	16	0	6	5	10	14	21	11	18	4	9	Bacteria|Firmicutes|Clostridia|Clostridiales
334697	36	0	0	#N/A	#N/A	#N/A	18	1.83712	0	1	1	0	0	4	1	2	0	0	3	1	0	0	1	0	2	0	0	1	0	6	2	0	1	Bacteria|Firmicutes|Clostridia|Clostridiales
458550	#N/A	#N/A	#N/A	#N/A	#N/A	#N/A	#N/A	#N/A	#N/A	0	0	0	0	0	0	0	0	0	0	0	0	0	0	0	0	0	0	1	0	0	0	0	0	Bacteria|Firmicutes|Clostridia|Clostridiales
580629	#N/A	#N/A	#N/A	#N/A	#N/A	#N/A	#N/A	#N/A	#N/A	0	1	0	1	1	0	0	0	0	0	0	0	0	2	0	2	0	1	0	0	0	1	1	0	Bacteria|Bacteroidetes|Bacteroidia|Bacteroidales|Bacteroidaceae|Bacteroides
209327	#N/A	#N/A	#N/A	#N/A	#N/A	#N/A	#N/A	#N/A	#N/A	0	0	0	0	0	0	0	0	0	0	0	0	0	0	0	0	0	0	0	0	0	0	1	0	Bacteria|Firmicutes|Clostridia|Clostridiales|Ruminococcaceae|Oscillospira
3906666	0	0.850746	0	7	-1.3125	0	14	-0.738997	0	2768	304	660	1982	1872	4067	2733	1291	385	2150	2007	1730	6	2328	2413	2267	3690	5268	3028	4692	1736	947	42	990	Bacteria|Bacteroidetes|Bacteroidia|Bacteroidales|[Odoribacteraceae]|Odoribacter
270200	#N/A	#N/A	#N/A	#N/A	#N/A	#N/A	#N/A	#N/A	#N/A	0	0	0	0	1	0	0	0	0	0	0	1	0	0	0	0	0	0	0	0	0	0	0	0	Bacteria|Firmicutes|Clostridia|Clostridiales|Clostridiaceae
162639	#N/A	#N/A	#N/A	#N/A	#N/A	#N/A	#N/A	#N/A	#N/A	0	0	0	0	0	0	0	0	1	0	0	0	0	1	0	0	0	0	0	0	0	0	0	0	Bacteria|Bacteroidetes|Bacteroidia|Bacteroidales|S24-7
332132	#N/A	#N/A	#N/A	#N/A	#N/A	#N/A	#N/A	#N/A	#N/A	0	0	1	0	0	0	0	0	0	0	0	0	0	0	0	0	0	0	0	0	0	0	0	0	Bacteria|Firmicutes|Clostridia|Clostridiales
274603	#N/A	#N/A	#N/A	#N/A	#N/A	#N/A	#N/A	#N/A	#N/A	0	0	0	0	0	0	0	0	0	0	1	0	0	0	1	0	1	0	0	0	0	0	0	0	Bacteria|Firmicutes|Clostridia|Clostridiales|Lachnospiraceae|[Ruminococcus]|gnavus
191602	#N/A	#N/A	#N/A	#N/A	#N/A	#N/A	#N/A	#N/A	#N/A	0	0	0	0	0	0	0	0	0	0	0	1	0	0	0	0	0	0	0	0	0	0	0	1	Bacteria|Firmicutes|Clostridia|Clostridiales
313524	#N/A	#N/A	#N/A	#N/A	#N/A	#N/A	#N/A	#N/A	#N/A	0	0	0	0	0	8	12	0	0	0	29	0	0	0	0	0	0	0	0	0	0	0	0	0	Bacteria|Firmicutes|Clostridia|Clostridiales|Ruminococcaceae
338992	#N/A	#N/A	#N/A	#N/A	#N/A	#N/A	#N/A	#N/A	#N/A	0	0	1	0	0	0	0	0	0	0	0	1	0	1	0	0	0	0	0	0	0	0	1	0	Bacteria|Firmicutes|Clostridia|Clostridiales|Lachnospiraceae
827497	#N/A	#N/A	#N/A	4	-0.230429	0.444444	9	0.668817	0	0	1	0	5	0	0	7	0	0	7	1	2	2	8	1	1	0	0	0	2	1	0	2	1	Bacteria|Proteobacteria|Gammaproteobacteria|Pseudomonadales|Pseudomonadaceae|Pseudomonas|alcaligenes
353012	56	0	0	7	-0.25	0	0	-0.706407	0	4673	6550	3272	826	1023	729	4141	736	217	2014	8035	1243	2263	1777	727	910	1539	886	2661	2338	767	571	797	488	Bacteria|Bacteroidetes|Bacteroidia|Bacteroidales|S24-7
328391	1	-0.320408	0.444444	#N/A	#N/A	#N/A	2	1.28745	0	0	1	1	2	1	1	1	1	0	1	2	0	2	7	2	0	1	0	3	4	3	1	2	2	Bacteria|Firmicutes|Clostridia|Clostridiales|Ruminococcaceae
4411295	#N/A	#N/A	#N/A	#N/A	#N/A	#N/A	#N/A	#N/A	#N/A	0	0	1	0	0	0	0	0	0	0	0	0	0	0	0	0	0	0	0	0	0	0	0	0	Bacteria|Firmicutes|Clostridia|Clostridiales|Lachnospiraceae
241843	#N/A	#N/A	#N/A	#N/A	#N/A	#N/A	#N/A	#N/A	#N/A	0	0	0	0	0	0	1	0	0	0	0	0	0	0	0	0	0	0	0	0	0	0	0	0	Bacteria|Firmicutes|Clostridia|Clostridiales|Clostridiaceae
210269	#N/A	#N/A	#N/A	#N/A	#N/A	#N/A	#N/A	#N/A	#N/A	0	0	0	0	0	0	0	0	0	0	0	1	0	0	0	0	0	0	0	0	0	0	0	0	Bacteria|Proteobacteria|Gammaproteobacteria|Enterobacteriales|Enterobacteriaceae|Enterobacter|cloacae
578649	#N/A	#N/A	#N/A	#N/A	#N/A	#N/A	#N/A	#N/A	#N/A	0	0	0	0	0	1	0	0	0	0	0	0	0	0	0	0	0	0	0	0	0	0	0	0	Bacteria|Firmicutes|Clostridia|Clostridiales|Lachnospiraceae
275873	#N/A	#N/A	#N/A	#N/A	#N/A	#N/A	#N/A	#N/A	#N/A	0	0	0	0	0	0	0	0	0	0	56	0	0	0	0	0	0	0	0	0	0	0	0	0	Bacteria|Firmicutes|Clostridia|Clostridiales
271131	#N/A	#N/A	#N/A	#N/A	#N/A	#N/A	#N/A	#N/A	#N/A	0	0	0	0	0	0	0	1	0	0	0	1	2	0	0	0	1	0	2	1	5	0	0	1	Bacteria|Bacteroidetes|Bacteroidia|Bacteroidales|S24-7
528421	#N/A	#N/A	#N/A	#N/A	#N/A	#N/A	#N/A	#N/A	#N/A	0	0	0	0	0	0	0	0	0	0	0	3	0	0	0	0	0	0	0	0	0	0	0	0	Bacteria|Proteobacteria|Gammaproteobacteria|Enterobacteriales|Enterobacteriaceae
537548	#N/A	#N/A	#N/A	#N/A	#N/A	#N/A	#N/A	#N/A	#N/A	0	0	0	0	0	1	0	0	0	0	0	0	0	0	0	0	0	0	0	0	0	0	0	0	Bacteria|Firmicutes|Clostridia|Clostridiales
275476	33	0	0	35	0	0	0	-1.04034	0	80	9	6	70	4	111	0	429	6	0	10	4	2	753	8	24	220	1353	225	225	0	0	2	2	Bacteria|Firmicutes|Clostridia|Clostridiales|Ruminococcaceae|Oscillospira
196746	#N/A	#N/A	#N/A	#N/A	#N/A	#N/A	#N/A	#N/A	#N/A	0	0	0	0	0	0	0	0	0	0	0	0	0	0	1	0	0	0	0	0	0	0	0	0	Bacteria|Firmicutes|Clostridia|Clostridiales|Ruminococcaceae
175371	#N/A	#N/A	#N/A	7	-0.25	0	11	-0.0333333	0	1	0	0	1	0	0	0	1	0	0	5	2	1	1	1	0	1	1	0	1	1	1	2	0	Bacteria|Firmicutes|Clostridia|Clostridiales|Lachnospiraceae|[Ruminococcus]|gnavus
339017	#N/A	#N/A	#N/A	#N/A	#N/A	#N/A	7	-0.254	0	1	13	0	0	0	0	0	0	0	0	0	6	0	0	0	0	10	0	31	80	0	10	9	0	Bacteria|Bacteroidetes|Bacteroidia|Bacteroidales|S24-7
175377	#N/A	#N/A	#N/A	5	-1.02598	0	#N/A	#N/A	#N/A	0	0	0	1	1	0	0	1	0	0	4	35	3	4	25	1	0	15	6	0	3	0	18	0	Bacteria|Firmicutes|Clostridia|Clostridiales|Ruminococcaceae|Oscillospira
269091	2	0.0976565	0	#N/A	#N/A	#N/A	14	-0.738997	0	0	1	0	2	0	1	0	1	2	0	12	2	3	3	1	2	2	0	1	2	0	0	1	4	Bacteria|Firmicutes|Clostridia|Clostridiales
508968	#N/A	#N/A	#N/A	#N/A	#N/A	#N/A	#N/A	#N/A	#N/A	0	0	0	0	0	0	0	0	0	0	0	0	0	1	0	0	0	0	0	0	0	2	0	1	Bacteria|Firmicutes|Clostridia|Clostridiales|Lachnospiraceae|Roseburia
269653	#N/A	#N/A	#N/A	#N/A	#N/A	#N/A	#N/A	#N/A	#N/A	0	0	0	0	0	0	0	0	0	0	0	0	0	1	14	0	0	0	0	4	1	0	0	3	Bacteria|Firmicutes|Clostridia|Clostridiales
4374084	#N/A	#N/A	#N/A	#N/A	#N/A	#N/A	#N/A	#N/A	#N/A	0	0	0	0	0	0	2	0	0	0	0	0	0	0	0	0	0	0	0	0	0	0	0	0	Bacteria|Bacteroidetes|Bacteroidia|Bacteroidales|Porphyromonadaceae|Parabacteroides|distasonis
269308	#N/A	#N/A	#N/A	#N/A	#N/A	#N/A	#N/A	#N/A	#N/A	0	2	0	0	0	1	1	0	0	0	0	0	1	1	0	0	1	0	0	1	1	0	0	0	Bacteria|Firmicutes|Clostridia|Clostridiales
269657	3	-0.974176	0	7	-0.25	0	6	-0.979806	0.5	767	987	314	237	707	0	1027	797	0	2678	614	0	2	2	1	166	0	0	0	1584	93	1189	350	1267	Bacteria|Firmicutes|Clostridia|Clostridiales|Lachnospiraceae
583500	#N/A	#N/A	#N/A	#N/A	#N/A	#N/A	#N/A	#N/A	#N/A	0	2	2	0	0	0	0	0	0	0	0	0	0	0	0	0	0	0	0	0	0	0	0	0	Bacteria|Firmicutes|Clostridia|Clostridiales|Lachnospiraceae|Dorea
269873	#N/A	#N/A	#N/A	#N/A	#N/A	#N/A	#N/A	#N/A	#N/A	0	0	0	0	0	0	0	0	0	0	0	0	1	0	0	0	0	0	0	0	0	0	0	0	Bacteria|Bacteroidetes|Bacteroidia|Bacteroidales|S24-7
330578	#N/A	#N/A	#N/A	#N/A	#N/A	#N/A	#N/A	#N/A	#N/A	1	0	0	0	0	0	0	0	0	0	0	0	0	0	0	0	4	0	0	0	0	0	1	7	Bacteria|Firmicutes|Clostridia|Clostridiales|Ruminococcaceae
345913	3	2.74541	0	36	0	0	7	-0.254	0.444444	667	362	331	313	432	490	378	345	457	1152	706	515	307	494	427	287	1849	740	941	677	400	235	898	204	Bacteria|Firmicutes|Clostridia|Clostridiales|Ruminococcaceae|Oscillospira
175847	#N/A	#N/A	#N/A	#N/A	#N/A	#N/A	46	0	0	1	0	1	0	3	0	0	0	0	0	1	4	0	0	0	0	1	2	2	2	2	3	0	1	Bacteria|Firmicutes|Clostridia|Clostridiales|Lachnospiraceae
4435934	#N/A	#N/A	#N/A	#N/A	#N/A	#N/A	#N/A	#N/A	#N/A	0	0	0	0	0	0	0	0	0	0	0	0	0	0	0	0	0	0	1	0	0	0	0	0	Bacteria|Firmicutes|Clostridia|Clostridiales
164071	#N/A	#N/A	#N/A	#N/A	#N/A	#N/A	#N/A	#N/A	#N/A	0	0	1	0	0	0	0	0	0	0	0	0	0	0	0	0	0	0	0	0	0	0	0	0	Bacteria|Firmicutes|Clostridia|Clostridiales|Lachnospiraceae
191493	#N/A	#N/A	#N/A	#N/A	#N/A	#N/A	#N/A	#N/A	#N/A	0	0	0	0	0	0	0	0	0	0	0	0	0	0	0	0	0	0	0	0	0	0	0	1	Bacteria|Firmicutes|Clostridia|Clostridiales|Ruminococcaceae
194425	#N/A	#N/A	#N/A	#N/A	#N/A	#N/A	#N/A	#N/A	#N/A	0	0	0	0	0	0	0	0	1	0	0	0	0	0	0	0	0	0	0	0	0	0	0	0	Bacteria|Firmicutes|Clostridia|Clostridiales|Ruminococcaceae|Oscillospira
264846	#N/A	#N/A	#N/A	#N/A	#N/A	#N/A	9	-0.490466	0	0	0	0	0	1	0	0	2	0	1	1	0	0	0	0	0	2	0	0	1	1	0	1	1	Bacteria|Firmicutes|Clostridia|Clostridiales
652823	5	-1.4596	0	8	-0.210105	0.56	10	0.168073	0.32	0	40	19	123	89	382	2	4	3	10	1	165	113	533	917	189	129	218	1108	1060	1	3	78	278	Bacteria|Firmicutes|Clostridia|Clostridiales|Ruminococcaceae
194429	#N/A	#N/A	#N/A	#N/A	#N/A	#N/A	#N/A	#N/A	#N/A	0	0	0	0	0	0	0	0	0	0	0	0	0	0	0	0	0	0	0	1	2	1	0	0	Bacteria|Bacteroidetes|Bacteroidia|Bacteroidales|Prevotellaceae
688923	#N/A	#N/A	#N/A	#N/A	#N/A	#N/A	#N/A	#N/A	#N/A	0	0	0	0	0	0	0	0	0	0	0	0	0	0	0	1	0	0	0	0	0	0	0	0	Bacteria|Firmicutes|Clostridia|Clostridiales|Ruminococcaceae
197760	#N/A	#N/A	#N/A	#N/A	#N/A	#N/A	#N/A	#N/A	#N/A	0	0	0	0	0	0	0	0	0	0	0	0	0	0	0	0	0	0	0	0	0	1	0	0	Bacteria|Firmicutes|Clostridia|Clostridiales|Lachnospiraceae|Roseburia
197765	#N/A	#N/A	#N/A	#N/A	#N/A	#N/A	#N/A	#N/A	#N/A	0	1	0	0	0	1	0	0	1	0	1	0	0	0	0	1	3	0	0	0	0	1	0	0	Bacteria|Firmicutes|Clostridia|Clostridiales|Lachnospiraceae|Dorea
209446	#N/A	#N/A	#N/A	#N/A	#N/A	#N/A	#N/A	#N/A	#N/A	0	0	0	0	0	0	0	0	0	0	0	0	0	0	0	0	0	0	0	0	0	1	0	0	Bacteria|Bacteroidetes|Bacteroidia|Bacteroidales|S24-7
416001	#N/A	#N/A	#N/A	#N/A	#N/A	#N/A	#N/A	#N/A	#N/A	0	0	1	0	0	0	0	0	0	0	0	0	0	0	0	0	0	0	0	0	0	0	0	0	Bacteria|Elusimicrobia|Elusimicrobia|Elusimicrobiales|Elusimicrobiaceae|Elusimicrobium
1111294	#N/A	#N/A	#N/A	#N/A	#N/A	#N/A	#N/A	#N/A	#N/A	0	0	0	0	0	0	1	0	0	2	1	0	0	2	0	0	0	1	0	0	0	0	0	0	Bacteria|Proteobacteria|Gammaproteobacteria|Enterobacteriales|Enterobacteriaceae
746679	#N/A	#N/A	#N/A	#N/A	#N/A	#N/A	#N/A	#N/A	#N/A	0	0	0	0	0	0	0	0	0	0	0	1	0	0	0	0	0	0	0	0	0	0	0	0	Bacteria|Proteobacteria|Gammaproteobacteria|Enterobacteriales|Enterobacteriaceae
331317	#N/A	#N/A	#N/A	#N/A	#N/A	#N/A	#N/A	#N/A	#N/A	0	0	0	0	0	0	0	0	0	0	0	0	0	0	0	0	0	1	0	0	0	0	0	0	Bacteria|Firmicutes|Clostridia|Clostridiales
941024	#N/A	#N/A	#N/A	#N/A	#N/A	#N/A	#N/A	#N/A	#N/A	0	0	0	0	0	0	0	0	1	0	0	0	0	0	0	0	0	0	0	0	0	0	0	0	Bacteria|Fusobacteria|Fusobacteriia|Fusobacteriales|Fusobacteriaceae|Fusobacterium
591399	13	1.73205	0	15	0	0.375	14	-0.0985329	0	0	2	1	0	1	0	0	1	0	2	2	2	0	1	0	0	1	0	1	0	0	0	4	1	Bacteria|Firmicutes|Clostridia|Clostridiales|Lachnospiraceae|Dorea
585914	10	0.781736	0	#N/A	#N/A	#N/A	10	0.168073	0	154	252	86	456	400	443	3430	19	32	5	4	74	353	95	248	87	118	920	76	354	356	245	63	61	Bacteria|Bacteroidetes|Bacteroidia|Bacteroidales|Porphyromonadaceae|Parabacteroides|distasonis
276364	#N/A	#N/A	#N/A	#N/A	#N/A	#N/A	#N/A	#N/A	#N/A	0	0	0	0	0	0	0	0	0	0	0	0	0	1	0	0	0	5	0	8	36	0	0	0	Bacteria|Firmicutes|Clostridia|Clostridiales|Lachnospiraceae
2212505	#N/A	#N/A	#N/A	6	-1.02598	0	#N/A	#N/A	#N/A	2	1	62	0	109	54	5	18	0	334	0	105	0	61	35	0	270	145	65	1	196	69	416	0	Bacteria|Bacteroidetes|Bacteroidia|Bacteroidales|S24-7
382721	6	-0.58621	0	45	0	0	4	-0.378517	0	0	0	1	1	2	0	1	1	0	7	2	1	4	1	1	3	6	1	3	2	1	3	1	1	Bacteria|Firmicutes|Clostridia|Clostridiales|Lachnospiraceae|Coprococcus
271378	#N/A	#N/A	#N/A	#N/A	#N/A	#N/A	#N/A	#N/A	#N/A	0	0	0	0	0	0	0	0	0	0	0	0	0	1	0	0	1	0	0	0	0	0	0	0	Bacteria|Firmicutes|Clostridia|Clostridiales
272111	#N/A	#N/A	#N/A	#N/A	#N/A	#N/A	#N/A	#N/A	#N/A	0	0	0	0	0	0	0	1	0	0	0	0	1	0	0	0	1	0	0	0	0	0	0	0	Bacteria|Firmicutes|Clostridia|Clostridiales
340853	#N/A	#N/A	#N/A	28	0	0	#N/A	#N/A	#N/A	2	135	2	102	28	1	5	11	3	1140	19	1	3	3	247	31	142	4	457	485	22	449	17	74	Bacteria|Firmicutes|Clostridia|Clostridiales|Lachnospiraceae
179907	#N/A	#N/A	#N/A	#N/A	#N/A	#N/A	#N/A	#N/A	#N/A	0	0	0	0	0	0	0	0	0	0	0	0	0	0	0	0	0	0	0	0	1	0	0	2	Bacteria|Firmicutes|Clostridia|Clostridiales|Lachnospiraceae
1107175	8	2.06155	0.32	#N/A	#N/A	#N/A	#N/A	#N/A	#N/A	0	0	28	56	15	0	0	1	1	51	0	0	31	34	191	9	0	0	0	0	12	31	49	0	Bacteria|Bacteroidetes|Bacteroidia|Bacteroidales|S24-7
2251909	31	0	0	#N/A	#N/A	#N/A	#N/A	#N/A	#N/A	0	0	0	1	3	2	1	0	0	0	0	0	2	0	0	0	2	1	3	0	0	0	0	0	Bacteria|Firmicutes|Clostridia|Clostridiales|Peptostreptococcaceae
452014	23	-1.04221	0	#N/A	#N/A	#N/A	0	-1.04034	0.444444	0	4	6	4	2	4	0	9	0	2	3	83	1	5	9	0	1	8	281	596	1	1	0	0	Bacteria|Firmicutes|Clostridia|Clostridiales|Ruminococcaceae|Oscillospira
180738	#N/A	#N/A	#N/A	#N/A	#N/A	#N/A	#N/A	#N/A	#N/A	0	0	0	0	1	0	0	0	0	0	0	0	0	0	0	0	0	0	0	0	0	0	0	0	Bacteria|Firmicutes|Clostridia|Clostridiales|Ruminococcaceae|Ruminococcus
213896	#N/A	#N/A	#N/A	#N/A	#N/A	#N/A	#N/A	#N/A	#N/A	0	0	0	0	0	0	0	0	0	0	0	0	0	0	1	0	0	0	0	0	0	1	0	0	Bacteria|Firmicutes|Clostridia|Clostridiales|Lachnospiraceae
331486	#N/A	#N/A	#N/A	#N/A	#N/A	#N/A	#N/A	#N/A	#N/A	0	0	0	0	0	0	0	0	0	0	0	0	0	0	0	0	0	0	0	0	0	1	0	0	Bacteria|Firmicutes|Clostridia|Clostridiales
4386437	#N/A	#N/A	#N/A	#N/A	#N/A	#N/A	#N/A	#N/A	#N/A	1	0	0	0	0	0	0	0	0	0	0	0	0	0	0	0	0	0	0	0	0	0	0	0	Bacteria|Firmicutes|Clostridia|Clostridiales|Ruminococcaceae|Oscillospira
266817	#N/A	#N/A	#N/A	#N/A	#N/A	#N/A	#N/A	#N/A	#N/A	0	0	0	0	1	0	0	0	0	0	0	0	0	0	0	0	0	0	0	0	0	0	0	0	Bacteria|Firmicutes|Erysipelotrichi|Erysipelotrichales|Erysipelotrichaceae|Allobaculum
272595	#N/A	#N/A	#N/A	#N/A	#N/A	#N/A	#N/A	#N/A	#N/A	0	0	0	0	0	1	0	0	0	0	0	0	0	0	0	0	0	0	0	1	0	1	0	0	Bacteria|Firmicutes|Clostridia|Clostridiales|Ruminococcaceae|Oscillospira
272593	#N/A	#N/A	#N/A	#N/A	#N/A	#N/A	#N/A	#N/A	#N/A	0	0	0	0	0	0	0	0	0	0	0	0	0	1	0	0	0	0	0	0	0	0	0	1	Bacteria|Firmicutes|Clostridia|Clostridiales|Lachnospiraceae|[Ruminococcus]|gnavus
976470	#N/A	#N/A	#N/A	#N/A	#N/A	#N/A	#N/A	#N/A	#N/A	0	2	0	0	0	0	13	0	0	5	1	0	0	2	0	0	0	0	0	0	0	0	0	0	Bacteria|Firmicutes|Clostridia|Clostridiales
4442459	#N/A	#N/A	#N/A	#N/A	#N/A	#N/A	#N/A	#N/A	#N/A	0	0	0	0	0	0	0	1	0	0	0	0	1	0	0	0	0	0	1	0	0	0	0	0	Bacteria|Bacteroidetes|Bacteroidia|Bacteroidales|Porphyromonadaceae|Parabacteroides
233435	9	0.215666	0	13	0.408248	0	14	0.541931	0	243	23	0	0	1	99	9	16	0	0	109	0	62	0	67	65	1	0	104	1	0	0	9	3	Bacteria|Bacteroidetes|Bacteroidia|Bacteroidales|S24-7
417981	2	-0.44643	0	#N/A	#N/A	#N/A	12	-0.520483	0	2	8	1	2	5	12	2	12	2	16	36	12	4	9	5	6	30	12	30	14	6	9	55	29	Bacteria|Firmicutes|Clostridia|Clostridiales|[Mogibacteriaceae]
273640	#N/A	#N/A	#N/A	#N/A	#N/A	#N/A	#N/A	#N/A	#N/A	0	0	0	0	0	2	0	0	0	0	4	0	0	0	0	0	1	0	0	0	0	0	0	0	Bacteria|Firmicutes|Clostridia|Clostridiales
1684221	#N/A	#N/A	#N/A	#N/A	#N/A	#N/A	#N/A	#N/A	#N/A	0	0	0	0	0	0	0	0	0	0	0	0	1	0	0	0	0	0	0	0	0	0	0	0	Bacteria|Proteobacteria|Deltaproteobacteria|Desulfovibrionales|Desulfovibrionaceae|Desulfovibrio|C21_c20
697874	#N/A	#N/A	#N/A	#N/A	#N/A	#N/A	1	-0.41165	0	2	0	0	0	0	4	0	0	0	0	0	0	0	1	0	0	1	0	2	9	0	0	5	0	Bacteria|Firmicutes|Clostridia|Clostridiales
273648	#N/A	#N/A	#N/A	#N/A	#N/A	#N/A	0	-0.873375	0.375	14	123	38	47	46	43	59	144	1	102	171	43	60	122	8	29	83	56	174	294	107	54	130	204	Bacteria|Firmicutes|Clostridia|Clostridiales|Ruminococcaceae
229808	#N/A	#N/A	#N/A	#N/A	#N/A	#N/A	#N/A	#N/A	#N/A	0	0	0	0	0	0	0	0	0	0	1	0	0	0	0	0	0	0	0	0	0	0	0	0	Bacteria|Firmicutes|Clostridia|Clostridiales|Lachnospiraceae
268927	#N/A	#N/A	#N/A	#N/A	#N/A	#N/A	#N/A	#N/A	#N/A	0	0	0	0	0	0	0	0	0	0	0	0	0	0	2	0	0	0	0	0	0	0	0	0	Bacteria|Firmicutes|Clostridia|Clostridiales
647215	3	-0.974176	0.5	4	0.576072	0.375	47	0	0	6	11	13	4	13	1	7	2	0	11	67	2	7	4	10	2	1	4	5	11	12	7	10	0	Bacteria|Firmicutes|Clostridia|Clostridiales|Ruminococcaceae|Oscillospira
327765	#N/A	#N/A	#N/A	#N/A	#N/A	#N/A	#N/A	#N/A	#N/A	0	0	0	0	1	0	0	0	0	1	0	0	0	0	0	0	0	0	1	0	0	0	0	1	Bacteria|Firmicutes|Bacilli|Lactobacillales|Lactobacillaceae|Lactobacillus
182771	#N/A	#N/A	#N/A	#N/A	#N/A	#N/A	#N/A	#N/A	#N/A	0	8	0	0	0	0	0	0	0	0	8	0	0	8	0	0	0	0	0	0	0	4	7	0	Bacteria|Verrucomicrobia|Verrucomicrobiae|Verrucomicrobiales|Verrucomicrobiaceae|Akkermansia|muciniphila
276580	#N/A	#N/A	#N/A	#N/A	#N/A	#N/A	#N/A	#N/A	#N/A	0	1	1	0	0	0	0	1	0	0	0	0	0	0	0	0	0	0	0	0	0	0	0	0	Bacteria|Firmicutes|Clostridia|Clostridiales
189057	#N/A	#N/A	#N/A	#N/A	#N/A	#N/A	#N/A	#N/A	#N/A	0	1	2	0	2	0	0	0	0	1	3	2	0	0	0	0	0	0	0	1	0	1	0	1	Bacteria|Firmicutes|Clostridia|Clostridiales|Ruminococcaceae|Oscillospira
180206	#N/A	#N/A	#N/A	#N/A	#N/A	#N/A	#N/A	#N/A	#N/A	0	0	0	0	0	0	0	0	0	0	1	0	0	0	0	0	0	0	0	1	0	0	1	1	Bacteria|Firmicutes|Clostridia|Clostridiales|Lachnospiraceae
193453	#N/A	#N/A	#N/A	#N/A	#N/A	#N/A	#N/A	#N/A	#N/A	0	0	0	0	0	0	0	0	0	0	1	0	0	6	52	0	0	0	0	18	0	0	0	9	Bacteria|Firmicutes|Clostridia|Clostridiales
258522	3	1.50555	0	#N/A	#N/A	#N/A	0	0.128438	0.297521	2	3	3	1	4	0	3	5	1	1	0	0	3	2	7	0	4	4	11	7	1	10	0	2	Bacteria|Firmicutes|Clostridia|Clostridiales|Lachnospiraceae
174842	18	-0.403376	0	#N/A	#N/A	#N/A	4	-1.00037	0	1	3	1	1	2	1	10	0	1	0	0	0	0	0	1	0	1	2	1	1	4	1	0	0	Bacteria|Bacteroidetes|Bacteroidia|Bacteroidales|Porphyromonadaceae|Parabacteroides|distasonis
289730	#N/A	#N/A	#N/A	#N/A	#N/A	#N/A	#N/A	#N/A	#N/A	0	0	0	0	0	0	0	0	0	0	0	0	1	0	0	0	0	0	1	0	0	0	1	0	Bacteria|Firmicutes|Clostridia|Clostridiales|Clostridiaceae|SMB53
267769	0	-0.867106	0	9	0.369388	0	#N/A	#N/A	#N/A	1	0	0	0	3	1	3	0	1	1	0	0	0	0	1	4	5	1	7	0	0	0	0	0	Bacteria|Firmicutes|Erysipelotrichi|Erysipelotrichales|Erysipelotrichaceae|Allobaculum
273240	6	0.0879316	0	2	-0.68313	0.625	4	0.243332	0	1	1	3	0	2	1	0	0	0	4	6	1	3	4	1	2	2	5	2	2	0	2	5	3	Bacteria|Firmicutes|Clostridia|Clostridiales|Lachnospiraceae|[Ruminococcus]|gnavus
320835	2	0.641742	0	2	-1.26867	0	#N/A	#N/A	#N/A	1	3	0	1	3	4	0	2	0	2	3	4	1	3	2	0	2	3	1	3	0	4	2	3	Bacteria|Firmicutes|Clostridia|Clostridiales|Ruminococcaceae|Oscillospira
573214	#N/A	#N/A	#N/A	#N/A	#N/A	#N/A	#N/A	#N/A	#N/A	0	0	0	0	0	1	0	0	0	1	0	0	0	0	0	0	0	0	0	0	0	0	0	0	Bacteria|Firmicutes|Bacilli|Lactobacillales|Lactobacillaceae|Lactobacillus
206790	#N/A	#N/A	#N/A	#N/A	#N/A	#N/A	#N/A	#N/A	#N/A	0	0	0	0	0	0	0	0	0	0	0	0	0	1	0	0	0	0	0	0	1	0	0	0	Bacteria|Bacteroidetes|Bacteroidia|Bacteroidales|S24-7
258099	#N/A	#N/A	#N/A	#N/A	#N/A	#N/A	#N/A	#N/A	#N/A	0	0	0	0	0	0	0	0	0	34	0	0	11	0	0	0	0	0	0	0	11	6	21	0	Bacteria|Firmicutes|Clostridia|Clostridiales|Ruminococcaceae
259781	#N/A	#N/A	#N/A	#N/A	#N/A	#N/A	#N/A	#N/A	#N/A	0	1	0	0	2	1	1	2	0	0	0	0	0	0	0	1	0	1	2	0	0	0	10	0	Bacteria|Firmicutes|Clostridia|Clostridiales|Lachnospiraceae|[Ruminococcus]|gnavus
187324	#N/A	#N/A	#N/A	#N/A	#N/A	#N/A	#N/A	#N/A	#N/A	0	0	1	0	0	0	0	0	0	0	0	1	1	0	0	0	0	0	0	0	0	0	0	0	Bacteria|Bacteroidetes|Bacteroidia|Bacteroidales|Bacteroidaceae|Bacteroides|caccae
189611	#N/A	#N/A	#N/A	#N/A	#N/A	#N/A	#N/A	#N/A	#N/A	0	0	0	0	1	0	0	0	0	0	0	0	0	0	0	0	0	0	0	0	0	0	0	0	Bacteria|Firmicutes|Clostridia|Clostridiales|Lachnospiraceae|Coprococcus
342962	#N/A	#N/A	#N/A	2	-0.68313	0	17	1.98637	0	4	12	4	2	2	2	0	1	1	4	13	0	2	4	3	2	0	2	3	2	2	1	1	0	Bacteria|Bacteroidetes|Bacteroidia|Bacteroidales|S24-7
197286	#N/A	#N/A	#N/A	#N/A	#N/A	#N/A	#N/A	#N/A	#N/A	0	0	0	0	0	0	0	0	0	0	0	0	0	1	0	0	0	0	0	0	0	0	0	0	Bacteria|Proteobacteria|Gammaproteobacteria|Enterobacteriales|Enterobacteriaceae
338348	3	-0.354246	0	20	-1	0	2	-0.0692178	0	1	1	1	1	1	3	1	2	0	0	2	2	0	2	4	2	0	0	3	2	1	0	1	1	Bacteria|Firmicutes|Clostridia|Clostridiales|Ruminococcaceae|Oscillospira
181467	#N/A	#N/A	#N/A	#N/A	#N/A	#N/A	#N/A	#N/A	#N/A	0	0	0	0	0	0	0	0	0	0	0	1	0	0	0	0	0	0	0	0	0	0	0	0	Bacteria|Firmicutes|Clostridia|Clostridiales|Clostridiaceae
2529278	#N/A	#N/A	#N/A	#N/A	#N/A	#N/A	#N/A	#N/A	#N/A	0	0	0	0	0	0	0	0	0	0	0	0	0	0	0	0	1	0	0	0	0	0	0	0	Bacteria|Proteobacteria|Gammaproteobacteria|Enterobacteriales|Enterobacteriaceae|Enterobacter|cloacae
210665	#N/A	#N/A	#N/A	#N/A	#N/A	#N/A	#N/A	#N/A	#N/A	0	0	0	0	0	0	0	0	0	4	0	4	0	0	0	0	0	0	0	0	3	0	1	0	Bacteria|Bacteroidetes|Bacteroidia|Bacteroidales|S24-7
197972	#N/A	#N/A	#N/A	#N/A	#N/A	#N/A	#N/A	#N/A	#N/A	0	0	0	0	0	0	0	0	0	0	0	0	0	0	0	0	0	0	1	0	0	0	0	0	Bacteria|Firmicutes|Clostridia|Clostridiales|Lachnospiraceae
260914	#N/A	#N/A	#N/A	#N/A	#N/A	#N/A	#N/A	#N/A	#N/A	0	0	0	0	1	0	0	1	0	0	0	0	0	0	0	0	1	0	1	0	0	0	0	0	Bacteria|Firmicutes|Clostridia|Clostridiales
214919	#N/A	#N/A	#N/A	1	-0.237775	0	7	2.032	0.277778	1	345	214	9	51	47	6	0	0	948	427	142	92	284	5	0	21	10	52	109	1	11	59	0	Bacteria|Firmicutes|Bacilli|Turicibacterales|Turicibacteraceae|Turicibacter
264646	#N/A	#N/A	#N/A	#N/A	#N/A	#N/A	4	0.865181	0	0	3	1	0	0	0	0	0	0	0	0	0	0	0	0	0	1	1	0	0	1	2	1	1	Bacteria|Firmicutes|Clostridia|Clostridiales|Ruminococcaceae
4376828	2	-0.990516	0	#N/A	#N/A	#N/A	20	-0.707107	0	7	2	0	5	2	2	0	11	0	0	0	2	0	5	4	10	8	1	26	2	0	2	0	3	Bacteria|Actinobacteria|Actinobacteria|Bifidobacteriales|Bifidobacteriaceae|Bifidobacterium
304427	#N/A	#N/A	#N/A	#N/A	#N/A	#N/A	#N/A	#N/A	#N/A	0	0	0	0	0	0	0	0	0	1	0	0	0	0	0	0	0	0	0	0	0	0	0	0	Bacteria|Firmicutes|Clostridia|Clostridiales|Ruminococcaceae|Oscillospira
185177	8	-1.03078	0	#N/A	#N/A	#N/A	#N/A	#N/A	#N/A	1	1	0	0	0	1	0	1	0	0	0	0	0	0	0	0	0	0	0	0	0	0	0	0	Bacteria|Firmicutes|Clostridia|Clostridiales
1788776	#N/A	#N/A	#N/A	#N/A	#N/A	#N/A	#N/A	#N/A	#N/A	0	0	0	3	0	0	1	0	0	0	0	0	0	0	0	0	1	0	0	0	0	0	0	0	Bacteria|Firmicutes|Clostridia|Clostridiales|Clostridiaceae
336696	18	-0.756329	0	11	-1.09322	0	#N/A	#N/A	#N/A	1	52	33	13	4	4	12	0	8	33	38	24	18	1	4	0	0	0	12	21	79	41	58	6	Bacteria|Firmicutes|Clostridia|Clostridiales|Ruminococcaceae
307608	#N/A	#N/A	#N/A	#N/A	#N/A	#N/A	21	-0.235702	0	0	0	0	0	0	2	0	0	1	0	0	0	0	1	0	1	0	2	1	5	0	0	1	0	Bacteria|Firmicutes|Clostridia|Clostridiales|Ruminococcaceae|Oscillospira
336691	6	0.0879316	0	9	0.60992	0.21875	15	0	0	7	23	9	1	24	6	4	19	0	5	7	7	4	3	2	1	7	11	3	14	6	19	8	3	Bacteria|Firmicutes|Clostridia|Clostridiales|Ruminococcaceae
2797565	7	-1.19217	0	9	3.25577	0.185	15	-1.14018	0	118	389	154	78	253	73	122	283	1	64	162	97	126	79	219	83	147	226	240	283	129	363	98	102	Bacteria|Firmicutes|Clostridia|Clostridiales|[Mogibacteriaceae]
177765	#N/A	#N/A	#N/A	#N/A	#N/A	#N/A	#N/A	#N/A	#N/A	0	0	0	0	0	0	0	0	0	0	0	0	0	0	0	0	1	0	0	0	0	0	0	0	Bacteria|Firmicutes|Clostridia|Clostridiales|Lachnospiraceae|Coprococcus
219826	#N/A	#N/A	#N/A	#N/A	#N/A	#N/A	#N/A	#N/A	#N/A	5	0	0	0	0	0	0	0	0	0	0	0	2	0	0	1	1	0	0	10	0	1	0	0	Bacteria|Proteobacteria|Gammaproteobacteria|Pseudomonadales|Moraxellaceae|Acinetobacter
161993	#N/A	#N/A	#N/A	#N/A	#N/A	#N/A	#N/A	#N/A	#N/A	0	0	0	0	0	0	0	0	0	0	0	0	0	0	0	1	0	0	0	0	0	1	0	0	Bacteria|Firmicutes|Clostridia|Clostridiales
313274	#N/A	#N/A	#N/A	#N/A	#N/A	#N/A	#N/A	#N/A	#N/A	0	0	0	0	0	0	0	0	0	0	0	1	0	1	2	0	1	0	0	1	0	0	0	0	Bacteria|Firmicutes|Clostridia|Clostridiales|Ruminococcaceae|Oscillospira
404691	48	0	0	12	-0.801784	0	5	-0.434372	0	109	119	181	123	327	275	74	202	3	78	128	129	106	180	84	105	50	123	72	322	60	72	21	51	Bacteria|Firmicutes|Clostridia|Clostridiales|Ruminococcaceae|Ruminococcus
173739	#N/A	#N/A	#N/A	#N/A	#N/A	#N/A	#N/A	#N/A	#N/A	0	0	0	0	0	0	0	0	0	0	0	0	0	0	0	0	0	0	0	0	0	1	0	0	Bacteria|Firmicutes|Clostridia|Clostridiales
348875	#N/A	#N/A	#N/A	#N/A	#N/A	#N/A	#N/A	#N/A	#N/A	0	0	2	0	0	0	0	0	0	0	0	0	0	0	0	0	0	0	0	1	0	0	1	1	Bacteria|Firmicutes|Clostridia|Clostridiales
838940	#N/A	#N/A	#N/A	#N/A	#N/A	#N/A	#N/A	#N/A	#N/A	0	0	0	0	0	0	0	0	0	0	0	0	0	0	1	0	0	0	0	0	0	0	0	0	Bacteria|Actinobacteria|Actinobacteria|Actinomycetales|Microbacteriaceae
349459	9	-1.40183	0	2	-1.26867	0	41	0	0	3	237	2	529	822	211	1021	3485	172	323	5886	8	242	2550	491	365	460	2208	3360	442	1111	269	344	1336	Bacteria|Firmicutes|Clostridia|Clostridiales|Ruminococcaceae
259120	#N/A	#N/A	#N/A	#N/A	#N/A	#N/A	#N/A	#N/A	#N/A	1	0	0	1	2	0	0	0	0	0	1	0	0	1	1	0	0	0	0	0	1	0	0	0	Bacteria|Firmicutes|Clostridia|Clostridiales|Ruminococcaceae
4357811	#N/A	#N/A	#N/A	#N/A	#N/A	#N/A	#N/A	#N/A	#N/A	1	1	0	0	0	0	0	0	0	0	0	0	0	0	0	0	0	0	0	0	0	0	0	0	Bacteria|Bacteroidetes|Bacteroidia|Bacteroidales|Bacteroidaceae|Bacteroides
2921213	#N/A	#N/A	#N/A	#N/A	#N/A	#N/A	#N/A	#N/A	#N/A	0	0	0	0	0	0	0	0	0	0	0	1	0	1	0	0	0	0	0	1	0	0	1	0	Bacteria|Bacteroidetes|Bacteroidia|Bacteroidales|Bacteroidaceae|Bacteroides
193678	0	1.42336	0	#N/A	#N/A	#N/A	#N/A	#N/A	#N/A	1	0	0	0	1	2	0	3	0	0	2	0	0	0	0	0	2	0	0	0	0	3	0	0	Bacteria|Firmicutes|Clostridia|Clostridiales|Ruminococcaceae
581079	#N/A	#N/A	#N/A	#N/A	#N/A	#N/A	27	0	0	0	0	0	0	0	2	0	0	0	0	1	0	0	1	1	0	0	1	0	20	5	0	1	0	Bacteria|Firmicutes|Clostridia|Clostridiales|Ruminococcaceae|Oscillospira
274083	#N/A	#N/A	#N/A	#N/A	#N/A	#N/A	#N/A	#N/A	#N/A	0	0	1	0	1	0	0	0	0	1	2	0	1	0	0	0	0	0	0	3	1	0	0	0	Bacteria|Firmicutes|Clostridia|Clostridiales|Ruminococcaceae|Oscillospira
268336	25	0	0	#N/A	#N/A	#N/A	9	0.0891756	0	0	1	0	0	1	0	3	4	0	0	0	0	0	0	1	3	3	1	7	0	0	1	1	0	Bacteria|Firmicutes|Erysipelotrichi|Erysipelotrichales|Erysipelotrichaceae|Allobaculum
1110008	#N/A	#N/A	#N/A	#N/A	#N/A	#N/A	#N/A	#N/A	#N/A	0	1	0	0	0	0	0	0	0	0	1	0	0	0	0	0	0	0	0	0	0	0	0	1	Bacteria|Firmicutes|Clostridia|Clostridiales|Ruminococcaceae
4329571	#N/A	#N/A	#N/A	#N/A	#N/A	#N/A	#N/A	#N/A	#N/A	0	0	0	0	0	0	1	0	0	0	0	0	0	0	0	0	0	0	0	0	0	0	0	0	Bacteria|Bacteroidetes|Bacteroidia|Bacteroidales|Porphyromonadaceae|Parabacteroides
210383	1	-0.836622	0.5	9	-0.833271	0	1	-1.00626	0.666667	0	2	3	2	3	1	1	1	0	12	2	2	10	3	4	1	4	5	5	8	3	2	3	1	Bacteria|Bacteroidetes|Bacteroidia|Bacteroidales|S24-7
832558	7	-1.19217	0	18	-1	0.5	0	1.46419	0.193906	1	0	2	2	1	4	1	2	0	0	0	205	0	6	1931	61	60	1	117	1074	0	0	0	0	Bacteria|Firmicutes|Clostridia|Clostridiales|Ruminococcaceae|Oscillospira
176236	#N/A	#N/A	#N/A	#N/A	#N/A	#N/A	#N/A	#N/A	#N/A	0	0	0	0	1	0	0	0	0	0	0	0	0	0	0	0	0	0	0	0	0	0	0	0	Bacteria|Firmicutes|Clostridia|Clostridiales
198888	#N/A	#N/A	#N/A	21	-0.866025	0	#N/A	#N/A	#N/A	1	0	0	0	0	1	0	1	0	0	2	1	0	1	2	0	0	0	3	2	0	0	0	0	Bacteria|Firmicutes|Clostridia|Clostridiales|Ruminococcaceae
586453	0	-0.294489	0.444444	9	-0.111675	0.32	#N/A	#N/A	#N/A	21	41	0	0	0	16	28	15	0	11	31	11	24	18	22	12	0	8	10	0	0	0	0	0	Bacteria|Firmicutes|Clostridia|Clostridiales|Christensenellaceae
246965	#N/A	#N/A	#N/A	#N/A	#N/A	#N/A	#N/A	#N/A	#N/A	0	0	0	0	0	0	0	0	0	1	0	0	0	0	0	0	0	0	0	0	0	0	0	0	Bacteria|Firmicutes|Clostridia|Clostridiales
199600	31	0	0	4	2.99557	0	1	-0.41165	0	2	1	2	0	0	0	0	2	0	0	1	1	1	0	3	1	1	0	2	2	0	0	1	0	Bacteria|Firmicutes|Clostridia|Clostridiales|Lachnospiraceae|Coprococcus
320224	#N/A	#N/A	#N/A	#N/A	#N/A	#N/A	0	-0.0385313	0	4	0	0	21	0	50	0	0	1	0	1	45	0	3	1	24	121	43	208	57	0	0	0	0	Bacteria|Firmicutes|Clostridia|Clostridiales|Ruminococcaceae|Ruminococcus
265182	20	-0.308607	0.375	0	0.136083	0	12	-1.0988	0	0	8	6	2	2	5	7	2	0	4	4	1	1	0	1	0	2	1	1	4	3	5	6	3	Bacteria|Firmicutes|Clostridia|Clostridiales|Ruminococcaceae|Oscillospira
1104999	#N/A	#N/A	#N/A	#N/A	#N/A	#N/A	#N/A	#N/A	#N/A	0	0	0	0	0	0	0	0	0	0	0	0	0	0	0	0	1	0	0	0	0	0	0	0	Bacteria|Gemmatimonadetes|Gemm-5
193859	#N/A	#N/A	#N/A	#N/A	#N/A	#N/A	1	-0.41165	0	5	1	6	6	4	6	24	2	2	2	8	3	6	11	7	18	14	35	7	7	5	9	9	2	Bacteria|Bacteroidetes|Bacteroidia|Bacteroidales|Bacteroidaceae|Bacteroides
264240	#N/A	#N/A	#N/A	#N/A	#N/A	#N/A	#N/A	#N/A	#N/A	0	0	0	0	0	0	0	0	0	0	0	0	0	0	0	0	0	0	1	0	0	0	0	0	Bacteria|Bacteroidetes|Bacteroidia|Bacteroidales|Rikenellaceae
322719	#N/A	#N/A	#N/A	#N/A	#N/A	#N/A	#N/A	#N/A	#N/A	0	0	0	0	0	2	7	0	0	0	16	0	0	0	0	0	0	0	0	0	0	0	0	0	Bacteria|Firmicutes|Clostridia|Clostridiales|Ruminococcaceae
298325	#N/A	#N/A	#N/A	#N/A	#N/A	#N/A	#N/A	#N/A	#N/A	4	0	0	0	0	0	0	0	0	0	0	3	0	3	0	3	0	0	0	0	0	0	0	0	Bacteria|Firmicutes|Clostridia|Clostridiales|Ruminococcaceae|Ruminococcus
309290	#N/A	#N/A	#N/A	#N/A	#N/A	#N/A	#N/A	#N/A	#N/A	0	0	0	0	1	0	0	1	0	0	0	0	0	0	0	1	0	0	0	1	0	2	1	0	Bacteria|Firmicutes|Clostridia|Clostridiales|Ruminococcaceae|Oscillospira
1110135	12	-1.15204	0	17	-0.75	0	7	-0.254	0	46	7	6	11	5	16	6	89	5	5	15	5	2	5	41	38	14	5	57	22	9	17	38	10	Bacteria|Firmicutes|Clostridia|Clostridiales|Lachnospiraceae
273182	#N/A	#N/A	#N/A	44	0	0	3	2.90096	0	0	0	0	4	1	0	0	0	1	0	1	1	2	0	0	1	0	0	1	1	2	0	0	1	Bacteria|Bacteroidetes|Bacteroidia|Bacteroidales|S24-7
230725	#N/A	#N/A	#N/A	#N/A	#N/A	#N/A	#N/A	#N/A	#N/A	2	1	3	2	6	3	1	1	1	0	14	0	2	0	3	3	0	3	1	5	9	1	5	3	Bacteria|Firmicutes|Clostridia|Clostridiales|Ruminococcaceae|Oscillospira
264325	2	-0.990516	0	26	-1.41421	0	19	0.337526	0	122	14	13	445	939	950	1	308	173	319	26	328	331	412	520	929	250	1119	728	1110	609	928	481	607	Bacteria|Bacteroidetes|Bacteroidia|Bacteroidales|Rikenellaceae
4482516	#N/A	#N/A	#N/A	#N/A	#N/A	#N/A	#N/A	#N/A	#N/A	0	0	0	0	1	0	2	0	0	0	0	0	0	0	0	0	1	0	0	0	0	0	0	0	Bacteria|Firmicutes|Clostridia|Clostridiales|Clostridiaceae
278563	#N/A	#N/A	#N/A	#N/A	#N/A	#N/A	#N/A	#N/A	#N/A	0	0	2	0	0	0	0	0	0	1	0	0	0	4	2	0	0	0	0	1	0	0	3	1	Bacteria|Firmicutes|Clostridia|Clostridiales
45363	#N/A	#N/A	#N/A	#N/A	#N/A	#N/A	#N/A	#N/A	#N/A	0	0	0	1	0	0	2	0	0	1	0	0	0	0	0	1	0	0	0	0	0	0	1	0	Bacteria|Firmicutes|Erysipelotrichi|Erysipelotrichales|Erysipelotrichaceae|Clostridium|cocleatum
271830	#N/A	#N/A	#N/A	#N/A	#N/A	#N/A	1	1.37217	0	0	0	0	0	0	0	1	0	0	0	0	0	0	0	0	0	1	2	1	1	0	0	1	0	Bacteria|Bacteroidetes|Bacteroidia|Bacteroidales|S24-7
351859	20	0.617213	0	8	-1.35068	0	#N/A	#N/A	#N/A	2	5	15	0	1	11	13	12	0	7	0	2	1	2	1	1	11	2	29	40	7	7	12	3	Bacteria|Firmicutes|Clostridia|Clostridiales
275882	#N/A	#N/A	#N/A	#N/A	#N/A	#N/A	#N/A	#N/A	#N/A	0	0	0	0	0	0	0	0	0	0	0	0	0	0	0	3	0	0	0	0	0	1	0	1	Bacteria|Firmicutes|Erysipelotrichi|Erysipelotrichales|Erysipelotrichaceae|Allobaculum
1111191	57	0	0	#N/A	#N/A	#N/A	24	-0.447214	0	376	1011	476	603	460	717	32	697	318	1745	6912	719	1907	1681	1748	1230	3921	1442	1107	1243	716	390	2763	1668	Bacteria|Firmicutes|Clostridia|Clostridiales|Lachnospiraceae|[Ruminococcus]|gnavus
265985	#N/A	#N/A	#N/A	#N/A	#N/A	#N/A	#N/A	#N/A	#N/A	0	0	0	1	0	0	0	0	0	0	0	0	0	0	0	0	0	0	0	0	0	0	0	0	Bacteria|Firmicutes|Clostridia|Clostridiales|Ruminococcaceae|Ruminococcus
316550	#N/A	#N/A	#N/A	#N/A	#N/A	#N/A	#N/A	#N/A	#N/A	0	0	0	0	0	0	0	0	0	7	11	0	0	0	0	0	14	0	0	0	0	0	0	0	Bacteria|Firmicutes|Clostridia|Clostridiales|Lachnospiraceae
586920	14	0	0	#N/A	#N/A	#N/A	6	-0.979806	0	0	0	3	0	4	0	12	1	0	1	3	0	0	1	0	0	1	0	0	4	0	3	1	0	Bacteria|Firmicutes|Clostridia|Clostridiales|Lachnospiraceae
353173	#N/A	#N/A	#N/A	#N/A	#N/A	#N/A	#N/A	#N/A	#N/A	1	0	0	0	0	0	0	0	0	0	0	0	0	0	0	0	0	0	0	0	0	0	0	0	Bacteria|Firmicutes|Clostridia|Clostridiales|Clostridiaceae|Clostridium
190658	#N/A	#N/A	#N/A	#N/A	#N/A	#N/A	#N/A	#N/A	#N/A	0	0	0	0	0	0	0	0	0	0	0	0	0	0	0	0	1	0	0	0	0	0	0	0	Bacteria|Firmicutes|Clostridia|Clostridiales|Ruminococcaceae|Oscillospira
1111350	8	1.03078	0	#N/A	#N/A	#N/A	13	-0.125988	0	8	2	0	0	0	25	43	0	0	0	0	0	0	0	2	0	0	0	9	15	0	7	5	0	Bacteria|Firmicutes|Clostridia|Clostridiales|Ruminococcaceae
275592	#N/A	#N/A	#N/A	#N/A	#N/A	#N/A	#N/A	#N/A	#N/A	0	0	0	0	0	1	1	0	0	0	0	0	0	0	0	0	0	0	0	0	0	0	1	0	Bacteria|Firmicutes|Clostridia|Clostridiales|Clostridiaceae
268220	#N/A	#N/A	#N/A	#N/A	#N/A	#N/A	#N/A	#N/A	#N/A	0	0	0	0	0	0	0	0	0	0	0	0	0	1	0	0	0	0	0	0	0	0	0	0	Bacteria|Firmicutes|Clostridia|Clostridiales
304897	12	-0.888716	0	0	-1.22474	0	#N/A	#N/A	#N/A	4	33	5	1	0	3	0	8	1	27	43	7	0	2	16	47	16	8	145	46	2	0	0	33	Bacteria|Firmicutes|Clostridia|Clostridiales
1749079	#N/A	#N/A	#N/A	#N/A	#N/A	#N/A	#N/A	#N/A	#N/A	0	0	0	0	1	0	0	0	0	0	0	0	2	0	0	0	1	0	0	0	1	0	1	0	Bacteria|Bacteroidetes|Bacteroidia|Bacteroidales|Bacteroidaceae|Bacteroides
157772	#N/A	#N/A	#N/A	#N/A	#N/A	#N/A	#N/A	#N/A	#N/A	0	0	0	1	0	0	0	0	0	0	0	0	0	0	0	0	0	0	0	0	0	0	0	0	Bacteria|Firmicutes|Clostridia|Clostridiales|Ruminococcaceae|Oscillospira
211039	#N/A	#N/A	#N/A	#N/A	#N/A	#N/A	#N/A	#N/A	#N/A	1	0	0	0	0	1	1	0	0	0	0	1	0	1	1	0	1	0	0	1	0	0	0	0	Bacteria|Bacteroidetes|Bacteroidia|Bacteroidales|S24-7
514988	#N/A	#N/A	#N/A	#N/A	#N/A	#N/A	#N/A	#N/A	#N/A	0	0	0	0	1	0	0	0	0	0	0	0	0	0	0	0	0	0	1	0	0	0	0	0	Bacteria|Firmicutes|Clostridia|Clostridiales|Clostridiaceae|SMB53
198398	16	0.534522	0	#N/A	#N/A	#N/A	#N/A	#N/A	#N/A	0	1	0	0	1	2	2	0	0	0	0	0	2	0	0	0	0	1	0	0	0	2	2	0	Bacteria|Firmicutes|Clostridia|Clostridiales
272905	#N/A	#N/A	#N/A	#N/A	#N/A	#N/A	2	0.609117	0.32	0	0	0	0	3	0	1	8	0	1	0	0	1	6	6	6	4	0	1	1	1	0	0	0	Bacteria|Firmicutes|Clostridia|Clostridiales
437137	#N/A	#N/A	#N/A	8	-0.210105	0	30	0	0	767	10	21	123	258	48	13	61	121	20	6	27	111	39	409	302	382	124	132	54	69	10	13	68	Bacteria|Proteobacteria|Betaproteobacteria|Burkholderiales|Alcaligenaceae|Sutterella
321195	#N/A	#N/A	#N/A	#N/A	#N/A	#N/A	#N/A	#N/A	#N/A	0	1	0	0	0	1	0	0	0	1	3	0	0	0	0	0	0	0	1	0	0	1	1	0	Bacteria|Firmicutes|Clostridia|Clostridiales
171399	#N/A	#N/A	#N/A	#N/A	#N/A	#N/A	#N/A	#N/A	#N/A	0	0	0	0	0	1	0	3	0	0	0	1	0	1	0	0	0	2	0	0	2	0	0	0	Bacteria|Firmicutes|Clostridia|Clostridiales|Lachnospiraceae|Roseburia
365256	#N/A	#N/A	#N/A	#N/A	#N/A	#N/A	#N/A	#N/A	#N/A	0	0	0	1	0	0	0	0	0	0	0	0	0	1	0	0	0	0	0	0	0	0	0	0	Bacteria|Firmicutes|Clostridia|Clostridiales|Lachnospiraceae|Anaerostipes
186406	#N/A	#N/A	#N/A	2	-0.68313	0	8	-0.408248	0	0	5	1	1	0	2	0	5	0	0	5	0	2	2	1	1	8	0	1	0	1	1	2	1	Bacteria|Firmicutes|Clostridia|Clostridiales|Lachnospiraceae|[Ruminococcus]|gnavus
273500	10	2.34521	0	9	0.128856	0	24	0.894427	0	333	536	56	453	0	342	789	24	32	336	535	975	654	1394	518	268	1188	1372	607	813	251	240	687	95	Bacteria|Bacteroidetes|Bacteroidia|Bacteroidales|S24-7
325633	#N/A	#N/A	#N/A	#N/A	#N/A	#N/A	#N/A	#N/A	#N/A	0	0	0	0	0	0	0	0	0	0	0	0	0	1	16	0	0	1	0	0	2	0	0	0	Bacteria|Firmicutes|Clostridia|Clostridiales|Ruminococcaceae
380190	#N/A	#N/A	#N/A	#N/A	#N/A	#N/A	#N/A	#N/A	#N/A	0	0	0	0	0	0	0	0	0	0	0	1	0	0	0	0	0	0	0	0	0	0	0	0	Bacteria|Firmicutes|Clostridia|Clostridiales
185201	#N/A	#N/A	#N/A	#N/A	#N/A	#N/A	#N/A	#N/A	#N/A	0	0	0	0	1	0	0	0	0	0	0	0	0	1	0	0	0	0	0	0	0	0	0	0	Bacteria|Firmicutes|Clostridia|Clostridiales
659756	#N/A	#N/A	#N/A	#N/A	#N/A	#N/A	#N/A	#N/A	#N/A	0	0	0	1	0	0	0	0	0	0	0	0	0	0	0	0	0	0	0	0	0	0	0	0	Bacteria|Actinobacteria|Actinobacteria|Actinomycetales|Micrococcaceae
271013	#N/A	#N/A	#N/A	#N/A	#N/A	#N/A	#N/A	#N/A	#N/A	0	0	0	0	0	0	0	0	0	0	0	1	0	0	0	0	0	0	0	0	0	0	0	0	Bacteria|Firmicutes|Clostridia|Clostridiales
160548	#N/A	#N/A	#N/A	#N/A	#N/A	#N/A	#N/A	#N/A	#N/A	0	0	0	0	0	0	0	0	0	0	0	0	0	0	0	0	0	0	0	0	0	0	0	1	Bacteria|Firmicutes|Bacilli|Lactobacillales|Lactobacillaceae|Pediococcus
187623	16	1.33631	0	#N/A	#N/A	#N/A	3	-0.993848	0	0	1	0	0	3	2	1	0	0	0	0	0	0	0	3	5	0	2	2	6	5	3	0	3	Bacteria|Bacteroidetes|Bacteroidia|Bacteroidales|Bacteroidaceae|Bacteroides|ovatus
913867	#N/A	#N/A	#N/A	#N/A	#N/A	#N/A	#N/A	#N/A	#N/A	0	0	0	0	0	1	0	0	0	0	0	0	0	0	0	0	0	0	0	0	0	0	0	0	Bacteria|Proteobacteria|Gammaproteobacteria|Pseudomonadales|Moraxellaceae|Acinetobacter|schindleri
197775	18	-0.756329	0	24	0.408248	0	#N/A	#N/A	#N/A	1	3	2	1	5	1	1	0	0	2	1	0	1	0	0	1	3	0	0	0	0	1	3	0	Bacteria|Firmicutes|Clostridia|Clostridiales
786449	#N/A	#N/A	#N/A	#N/A	#N/A	#N/A	#N/A	#N/A	#N/A	0	0	0	0	0	0	0	0	0	2	1	0	0	0	0	0	0	0	1	0	0	0	4	0	Bacteria|Firmicutes|Clostridia|Clostridiales|Lachnospiraceae
569552	#N/A	#N/A	#N/A	#N/A	#N/A	#N/A	#N/A	#N/A	#N/A	0	0	0	0	0	0	0	0	0	0	0	0	0	0	0	0	1	0	0	0	0	0	0	0	Bacteria|Firmicutes|Bacilli|Lactobacillales|Streptococcaceae|Lactococcus
264101	#N/A	#N/A	#N/A	#N/A	#N/A	#N/A	#N/A	#N/A	#N/A	0	0	0	0	0	0	0	0	0	0	1	0	0	0	0	0	0	0	0	0	0	0	0	0	Bacteria|Firmicutes|Clostridia|Clostridiales|Ruminococcaceae|Oscillospira
178478	4	-1.12767	0	17	-0.75	0	#N/A	#N/A	#N/A	0	0	1	2	0	13	8	6	0	0	2	0	0	1	23	9	7	12	18	11	35	8	6	13	Bacteria|Bacteroidetes|Bacteroidia|Bacteroidales|Bacteroidaceae|Bacteroides
400599	23	2.23331	0	#N/A	#N/A	#N/A	#N/A	#N/A	#N/A	2077	1284	1135	1292	2274	1739	1230	2327	32	1083	1839	2063	984	2003	1868	830	766	2601	2937	4854	1309	994	1470	1243	Bacteria|Firmicutes|Clostridia|Clostridiales
3940440	3	-0.974176	0	6	-1.02598	0	#N/A	#N/A	#N/A	8	8	5	6	3	18	6	7	7	11	0	16	21	11	6	7	4	1	0	3	0	3	18	5	Bacteria|Bacteroidetes|Bacteroidia|Bacteroidales|Bacteroidaceae|Bacteroides
211720	8	0	0	22	0.707107	0	#N/A	#N/A	#N/A	1	0	0	2	13	0	173	0	7	652	0	0	565	51	0	623	0	0	0	0	0	0	0	1	Bacteria|Proteobacteria|Alphaproteobacteria|RF32
182836	#N/A	#N/A	#N/A	#N/A	#N/A	#N/A	#N/A	#N/A	#N/A	0	0	0	0	0	0	0	0	0	0	0	0	0	2	0	0	3	0	3	1	0	0	0	0	Bacteria|Firmicutes|Clostridia|Clostridiales
263451	4	-0.0980581	0.444444	#N/A	#N/A	#N/A	#N/A	#N/A	#N/A	2	1	2	0	2	0	2	0	0	3	1	1	0	0	0	0	0	0	0	0	1	0	0	0	Bacteria|Firmicutes|Clostridia|Clostridiales
511908	#N/A	#N/A	#N/A	#N/A	#N/A	#N/A	#N/A	#N/A	#N/A	0	0	0	0	0	0	0	0	0	0	0	5	0	0	7	0	0	0	0	0	0	0	0	0	Bacteria|Proteobacteria|Gammaproteobacteria|Enterobacteriales|Enterobacteriaceae|Klebsiella
310653	1	0.195805	0	#N/A	#N/A	#N/A	16	-0.381385	0	0	0	2	0	0	1	2	1	0	1	0	1	0	0	0	0	1	0	1	2	2	0	3	0	Bacteria|Firmicutes|Clostridia|Clostridiales
188138	#N/A	#N/A	#N/A	#N/A	#N/A	#N/A	#N/A	#N/A	#N/A	0	0	0	0	0	0	0	0	0	0	0	1	0	0	0	0	0	0	0	0	0	0	2	0	Bacteria|Firmicutes|Clostridia|Clostridiales|Lachnospiraceae
4030375	#N/A	#N/A	#N/A	#N/A	#N/A	#N/A	3	-0.214886	0	3	5	3	2	3	4	2	4	0	3	0	6	2	1	1	3	6	1	0	1	0	0	6	2	Bacteria|Bacteroidetes|Bacteroidia|Bacteroidales|Bacteroidaceae|Bacteroides
4480176	#N/A	#N/A	#N/A	#N/A	#N/A	#N/A	#N/A	#N/A	#N/A	0	0	0	0	0	0	0	0	0	0	0	0	0	0	0	0	431	0	0	1	0	0	1	0	Bacteria|Firmicutes|Clostridia|Clostridiales
239771	#N/A	#N/A	#N/A	#N/A	#N/A	#N/A	#N/A	#N/A	#N/A	0	1	0	3	0	0	0	0	0	0	0	0	0	0	0	0	1	0	0	0	0	0	0	0	Bacteria|Firmicutes|Clostridia|Clostridiales|Clostridiaceae|Clostridium
296496	#N/A	#N/A	#N/A	#N/A	#N/A	#N/A	#N/A	#N/A	#N/A	0	0	0	0	0	0	0	0	0	0	0	0	0	0	0	0	0	0	0	1	0	0	1	0	Bacteria|Firmicutes|Clostridia|Clostridiales|Ruminococcaceae
344527	25	0	0	0	0.136083	0	0	-0.873375	0	6	10	0	7	1	7	1	10	0	6	18	2	4	0	11	4	3	13	24	9	0	5	4	4	Bacteria|Firmicutes|Clostridia|Clostridiales|Ruminococcaceae
202131	#N/A	#N/A	#N/A	#N/A	#N/A	#N/A	#N/A	#N/A	#N/A	0	0	0	0	0	0	0	0	0	0	0	0	0	0	0	0	0	0	0	1	0	0	0	0	Bacteria|Firmicutes|Bacilli|Lactobacillales|Lactobacillaceae|Lactobacillus
319791	#N/A	#N/A	#N/A	#N/A	#N/A	#N/A	#N/A	#N/A	#N/A	0	0	0	0	0	0	0	0	0	0	0	0	0	0	1	0	0	1	0	0	0	0	0	0	Bacteria|Firmicutes|Clostridia|Clostridiales|Ruminococcaceae
519290	#N/A	#N/A	#N/A	9	-0.592739	0	12	0.0578315	0.375	23	3	0	3	6	1	1	8	0	1	1	4	5	2	6	16	19	5	17	2	0	4	2	4	Bacteria|Actinobacteria|Actinobacteria|Bifidobacteriales|Bifidobacteriaceae|Bifidobacterium|pseudolongum
339351	17	-1.1239	0.5	#N/A	#N/A	#N/A	#N/A	#N/A	#N/A	0	23	1	0	0	452	1	0	0	0	1034	1	0	0	1	0	269	0	0	0	0	43	3	0	Bacteria|Firmicutes|Clostridia|Clostridiales
196553	6	2.7845	0	0	0.136083	0	0	-1.20731	0	1	1	1	0	1	1	0	2	1	2	2	2	2	1	2	1	3	0	2	2	1	0	0	2	Bacteria|Firmicutes|Clostridia|Clostridiales|Ruminococcaceae|Oscillospira
353593	#N/A	#N/A	#N/A	#N/A	#N/A	#N/A	#N/A	#N/A	#N/A	9	3	6	4	3	7	6	2	1	0	3	2	5	7	5	3	2	5	11	14	12	2	5	6	Bacteria|Firmicutes|Clostridia|Clostridiales
4226929	4	-0.0980581	0	6	0.307794	0	16	0.476731	0	97	56	314	105	215	416	611	80	62	645	0	196	670	238	186	204	629	1	1156	3103	679	300	1377	101	Bacteria|Bacteroidetes|Bacteroidia|Bacteroidales|Bacteroidaceae|Bacteroides
287879	#N/A	#N/A	#N/A	#N/A	#N/A	#N/A	#N/A	#N/A	#N/A	0	0	0	1	0	0	0	0	0	0	0	0	0	0	0	0	0	0	0	0	0	0	0	0	Bacteria|Firmicutes|Clostridia|Clostridiales
849147	#N/A	#N/A	#N/A	9	-0.111675	0	#N/A	#N/A	#N/A	3	2	0	1	6	3	3	6	0	2	1	1	3	3	4	2	3	10	9	7	0	4	2	5	Bacteria|Firmicutes|Clostridia|Clostridiales
315974	#N/A	#N/A	#N/A	#N/A	#N/A	#N/A	#N/A	#N/A	#N/A	0	0	0	0	1	0	1	0	0	0	0	0	0	0	0	0	0	0	0	0	1	0	0	1	Bacteria|Firmicutes|Clostridia|Clostridiales|Lachnospiraceae
263074	#N/A	#N/A	#N/A	#N/A	#N/A	#N/A	#N/A	#N/A	#N/A	0	0	0	0	0	1	1	1	0	2	0	0	0	0	0	0	1	0	0	1	0	0	0	0	Bacteria|Firmicutes|Clostridia|Clostridiales|Lachnospiraceae|Coprococcus
288168	#N/A	#N/A	#N/A	#N/A	#N/A	#N/A	#N/A	#N/A	#N/A	0	0	0	0	0	0	0	0	0	0	0	0	0	0	0	0	3	0	0	0	0	0	0	0	Bacteria|Firmicutes|Clostridia|Clostridiales|Lachnospiraceae
1108078	32	0	0	#N/A	#N/A	#N/A	41	0	0	4	50	38	89	174	38	25	6	0	124	50	18	18	11	99	6	3	8	14	204	34	102	14	67	Bacteria|Firmicutes|Clostridia|Clostridiales
268353	#N/A	#N/A	#N/A	#N/A	#N/A	#N/A	#N/A	#N/A	#N/A	0	0	0	1	0	0	0	0	0	0	0	0	0	0	0	0	0	0	0	0	0	0	0	0	Bacteria|Proteobacteria|Alphaproteobacteria|Caulobacterales|Caulobacteraceae|Brevundimonas|diminuta
272878	18	-0.756329	0	1	1.30776	0	7	-0.254	0	9	6	240	3	4	25	9	0	1	4	42	24	24	18	10	9	52	7	37	17	11	36	29	19	Bacteria|Firmicutes|Clostridia|Clostridiales
206324	#N/A	#N/A	#N/A	#N/A	#N/A	#N/A	#N/A	#N/A	#N/A	0	0	0	0	0	0	0	1	0	0	0	0	0	0	0	0	0	0	0	0	0	0	0	0	Bacteria|Bacteroidetes|Bacteroidia|Bacteroidales|S24-7
238570	#N/A	#N/A	#N/A	#N/A	#N/A	#N/A	#N/A	#N/A	#N/A	0	0	0	1	0	0	0	0	0	0	0	0	0	0	0	1	0	0	0	0	0	0	0	0	Bacteria|Bacteroidetes|Bacteroidia|Bacteroidales|S24-7
359984	#N/A	#N/A	#N/A	#N/A	#N/A	#N/A	21	2.12132	0.197531	523	0	0	0	0	1	319	0	1074	0	1	3	0	0	0	0	7428	2	1	5	0	0	50	2964	Bacteria|Firmicutes|Clostridia|Clostridiales|Ruminococcaceae
267373	#N/A	#N/A	#N/A	#N/A	#N/A	#N/A	#N/A	#N/A	#N/A	0	1	0	0	2	0	0	0	0	1	1	0	1	0	0	0	0	0	0	0	0	1	0	0	Bacteria|Firmicutes|Clostridia|Clostridiales
302932	#N/A	#N/A	#N/A	#N/A	#N/A	#N/A	#N/A	#N/A	#N/A	0	0	0	0	0	0	0	0	0	1	0	0	1	0	0	0	0	0	0	0	1	0	0	0	Bacteria|Firmicutes|Clostridia|Clostridiales|Clostridiaceae
185186	#N/A	#N/A	#N/A	#N/A	#N/A	#N/A	#N/A	#N/A	#N/A	0	1	0	0	0	0	0	0	0	0	3	0	0	1	0	0	0	0	0	0	0	1	1	0	Bacteria|Verrucomicrobia|Verrucomicrobiae|Verrucomicrobiales|Verrucomicrobiaceae|Akkermansia|muciniphila
330183	#N/A	#N/A	#N/A	#N/A	#N/A	#N/A	#N/A	#N/A	#N/A	0	0	0	0	0	0	0	0	0	0	0	0	0	0	0	1	0	0	0	0	0	0	0	0	Bacteria|Firmicutes|Clostridia|Clostridiales
354905	#N/A	#N/A	#N/A	25	2	0	11	-1.16667	0	7	0	0	7	29	0	0	0	4	0	0	2	1	0	0	18	12	0	10	5	0	22	1	1	Bacteria|Firmicutes|Bacilli|Lactobacillales|Lactobacillaceae|Lactobacillus
177952	#N/A	#N/A	#N/A	5	0.205196	0	6	0.159503	0	0	2	0	1	0	0	0	1	0	0	1	0	1	1	0	1	1	0	0	0	1	1	1	0	Bacteria|Firmicutes|Clostridia|Clostridiales|Ruminococcaceae|Ruminococcus
327900	#N/A	#N/A	#N/A	8	-0.210105	0	11	1.1	0.277778	1	0	0	1	0	0	0	0	0	0	0	2	2	1	3	1	1	1	3	1	0	1	0	0	Bacteria|Firmicutes|Clostridia|Clostridiales|Ruminococcaceae|Ruminococcus
461795	#N/A	#N/A	#N/A	#N/A	#N/A	#N/A	#N/A	#N/A	#N/A	0	1	0	1	0	0	0	0	0	1	0	0	0	0	0	0	0	0	0	0	0	0	0	0	Bacteria|Firmicutes|Clostridia|Clostridiales|Ruminococcaceae|Oscillospira
844375	#N/A	#N/A	#N/A	#N/A	#N/A	#N/A	#N/A	#N/A	#N/A	0	0	0	0	0	0	0	1	1	0	0	0	0	1	0	0	0	0	0	0	0	0	0	0	Bacteria|Bacteroidetes|Bacteroidia|Bacteroidales|Bacteroidaceae|Bacteroides
188225	#N/A	#N/A	#N/A	#N/A	#N/A	#N/A	#N/A	#N/A	#N/A	1	1	0	0	0	0	0	0	3	0	0	0	0	0	0	0	3	0	1	0	0	0	0	0	Bacteria|Firmicutes|Clostridia|Clostridiales|Ruminococcaceae
165046	#N/A	#N/A	#N/A	#N/A	#N/A	#N/A	#N/A	#N/A	#N/A	0	0	1	0	1	0	0	2	1	0	1	1	0	0	1	1	1	2	0	0	0	0	0	0	Bacteria|Firmicutes|Clostridia|Clostridiales|Ruminococcaceae|Oscillospira
403497	17	-0.561951	0	1	0.534994	0	#N/A	#N/A	#N/A	21	18	28	0	16	12	17	18	3	23	39	22	14	15	7	0	16	11	36	12	12	24	29	17	Bacteria|Firmicutes|Clostridia|Clostridiales|Lachnospiraceae
4354582	#N/A	#N/A	#N/A	#N/A	#N/A	#N/A	#N/A	#N/A	#N/A	0	0	0	0	0	0	0	0	0	0	1	0	0	0	0	0	0	0	0	0	0	0	0	0	Bacteria|Firmicutes|Clostridia|Clostridiales|Lachnospiraceae|Dorea
532569	#N/A	#N/A	#N/A	#N/A	#N/A	#N/A	#N/A	#N/A	#N/A	0	0	0	1	0	0	0	1	0	0	0	0	0	0	0	0	0	0	0	0	0	0	10	0	Bacteria|Proteobacteria|Gammaproteobacteria|Pseudomonadales|Moraxellaceae|Acinetobacter|lwoffii
322367	#N/A	#N/A	#N/A	#N/A	#N/A	#N/A	#N/A	#N/A	#N/A	0	0	0	0	0	0	0	0	0	0	0	0	0	0	0	0	1	0	0	0	0	0	0	0	Bacteria|Firmicutes|Clostridia|Clostridiales|Clostridiaceae
355187	#N/A	#N/A	#N/A	#N/A	#N/A	#N/A	#N/A	#N/A	#N/A	0	0	0	0	0	0	0	0	0	0	0	0	0	0	0	0	2	0	0	0	0	0	0	0	Bacteria|Firmicutes|Clostridia|Clostridiales
238487	#N/A	#N/A	#N/A	#N/A	#N/A	#N/A	#N/A	#N/A	#N/A	0	1	1	0	0	0	0	0	0	0	0	0	0	1	0	0	0	0	0	0	1	0	0	0	Bacteria|Firmicutes|Clostridia|Clostridiales|Ruminococcaceae|Ruminococcus
355746	55	0	0	19	-1.5	0	#N/A	#N/A	#N/A	3	0	80	0	103	55	11	19	1	338	1	115	0	70	42	1	255	156	63	0	203	98	418	0	Bacteria|Bacteroidetes|Bacteroidia|Bacteroidales|S24-7
4344860	#N/A	#N/A	#N/A	#N/A	#N/A	#N/A	#N/A	#N/A	#N/A	0	0	0	0	0	0	0	0	0	0	1	0	0	0	0	0	0	0	0	0	0	1	0	0	Bacteria|Firmicutes|Clostridia|Clostridiales|Lachnospiraceae|Roseburia
242029	2	-0.990516	0	9	-0.111675	0.32	1	0.182956	0	6	10	4	7	0	2	9	0	2	11	6	15	12	18	8	7	31	41	9	16	3	9	13	1	Bacteria|Bacteroidetes|Bacteroidia|Bacteroidales|S24-7
276597	5	0.208514	0	5	-0.410391	0	0	-0.539438	0	82	91	87	41	80	47	125	119	5	169	12	106	70	11	0	23	53	75	51	88	2	45	43	13	Bacteria|Firmicutes|Clostridia|Clostridiales
174337	#N/A	#N/A	#N/A	#N/A	#N/A	#N/A	#N/A	#N/A	#N/A	0	1	0	0	0	0	0	0	0	0	4	0	0	1	0	0	0	0	0	0	0	0	2	0	Bacteria|Verrucomicrobia|Verrucomicrobiae|Verrucomicrobiales|Verrucomicrobiaceae|Akkermansia|muciniphila
449417	#N/A	#N/A	#N/A	#N/A	#N/A	#N/A	#N/A	#N/A	#N/A	0	1	0	0	0	1	0	1	0	1	2	0	0	0	2	0	4	2	0	0	0	0	1	0	Bacteria|Firmicutes|Clostridia|Clostridiales|Lachnospiraceae|[Ruminococcus]|gnavus
4410988	#N/A	#N/A	#N/A	#N/A	#N/A	#N/A	#N/A	#N/A	#N/A	0	0	0	0	0	0	0	0	0	0	0	0	0	0	0	0	0	1	0	0	0	0	0	0	Bacteria|Firmicutes|Clostridia|Clostridiales|Ruminococcaceae|Oscillospira
263857	#N/A	#N/A	#N/A	#N/A	#N/A	#N/A	#N/A	#N/A	#N/A	0	0	0	0	0	0	0	0	0	0	0	0	0	0	0	0	0	0	1	0	0	0	0	0	Bacteria|Proteobacteria|Alphaproteobacteria|Rhodospirillales|Acetobacteraceae|Rhodovastum|atsumiense
263850	13	0	0	7	-1.3125	0	2	-0.0692178	0.375	2	1	1	0	1	0	0	1	2	3	3	2	1	0	1	0	3	0	1	1	2	0	0	0	Bacteria|Bacteroidetes|Bacteroidia|Bacteroidales|S24-7
326644	#N/A	#N/A	#N/A	#N/A	#N/A	#N/A	#N/A	#N/A	#N/A	0	0	0	0	0	0	0	0	0	0	1	0	0	0	0	0	0	0	0	0	0	103	0	92	Bacteria|Firmicutes|Clostridia|Clostridiales
1107335	#N/A	#N/A	#N/A	#N/A	#N/A	#N/A	#N/A	#N/A	#N/A	0	0	0	3	0	2	0	0	0	0	0	0	0	1	0	0	0	0	0	1	0	0	2	0	Bacteria|Proteobacteria|Gammaproteobacteria|Pseudomonadales|Moraxellaceae|Acinetobacter
208479	3	-0.974176	0	6	0.307794	0	#N/A	#N/A	#N/A	325	221	404	582	249	0	791	327	4	312	0	313	996	389	295	62	109	1104	860	610	252	401	275	110	Bacteria|Bacteroidetes|Bacteroidia|Bacteroidales|[Odoribacteraceae]|Butyricimonas
259335	#N/A	#N/A	#N/A	#N/A	#N/A	#N/A	#N/A	#N/A	#N/A	0	0	1	0	0	0	2	0	0	2	0	0	0	0	0	0	1	0	0	0	0	0	0	1	Bacteria|Firmicutes|Clostridia|Clostridiales
577512	#N/A	#N/A	#N/A	#N/A	#N/A	#N/A	#N/A	#N/A	#N/A	0	1	1	0	0	0	0	0	0	1	2	1	0	0	0	0	0	0	23	0	0	0	0	0	Bacteria|Firmicutes|Clostridia|Clostridiales
461487	#N/A	#N/A	#N/A	#N/A	#N/A	#N/A	#N/A	#N/A	#N/A	0	0	0	0	0	0	0	0	0	0	0	0	0	0	0	0	0	0	0	1	1	0	0	0	Bacteria|Firmicutes|Clostridia|Clostridiales
830014	2	-0.990516	0	5	-1.02598	0.5	#N/A	#N/A	#N/A	1	6	0	1	2	2	0	2	0	2	7	0	4	1	0	0	0	3	2	0	6	3	0	1	Bacteria|Firmicutes|Clostridia|Clostridiales
589277	4	1.96116	0	#N/A	#N/A	#N/A	10	2.05049	0	27	49	45	60	28	39	54	40	28	60	0	95	82	53	36	48	43	35	34	12	11	12	55	16	Bacteria|Bacteroidetes|Bacteroidia|Bacteroidales|Bacteroidaceae|Bacteroides
541602	#N/A	#N/A	#N/A	#N/A	#N/A	#N/A	#N/A	#N/A	#N/A	0	1	0	0	0	0	0	0	0	0	3	0	0	0	0	0	0	0	0	0	0	0	0	2	Bacteria|Firmicutes|Clostridia|Clostridiales|Lachnospiraceae|Roseburia
189666	12	1.48119	0.367347	#N/A	#N/A	#N/A	#N/A	#N/A	#N/A	0	2	1	0	4	0	2	0	0	0	0	0	3	0	0	0	1	0	0	0	0	2	0	0	Bacteria|Firmicutes|Clostridia|Clostridiales
355291	22	-1.49717	0	6	-1.02598	0	16	-1.2395	0	1	1	3	3	4	2	0	0	0	5	0	1	6	5	0	1	4	0	7	10	2	2	7	0	Bacteria|Bacteroidetes|Bacteroidia|Bacteroidales|Bacteroidaceae|Bacteroides
357582	#N/A	#N/A	#N/A	#N/A	#N/A	#N/A	#N/A	#N/A	#N/A	0	0	0	0	1	0	0	0	0	1	0	0	1	0	0	0	0	0	0	0	0	0	0	0	Bacteria|Bacteroidetes|Bacteroidia|Bacteroidales|Bacteroidaceae|Bacteroides
397363	1	-0.836622	0	#N/A	#N/A	#N/A	#N/A	#N/A	#N/A	0	0	15	0	2	1	1	1	1	0	1	1	0	0	5	1	1	1	0	1	5	2	2	2	Bacteria|Firmicutes|Clostridia|Clostridiales|Ruminococcaceae|Oscillospira
354163	4	-1.12767	0.444444	#N/A	#N/A	#N/A	0	-0.873375	0	1	4	8	0	14	1	6	0	4	3	22	3	1	1	0	0	3	13	1	1	23	45	14	26	Bacteria|Firmicutes|Clostridia|Clostridiales
1871	#N/A	#N/A	#N/A	#N/A	#N/A	#N/A	#N/A	#N/A	#N/A	0	0	0	0	0	0	0	0	0	0	0	0	0	0	0	0	0	0	0	0	0	1	0	0	Bacteria|Deferribacteres|Deferribacteres|Deferribacterales|Deferribacteraceae|Mucispirillum|schaedleri
309363	#N/A	#N/A	#N/A	3	0.148741	0	2	-0.0692178	0	3	2	0	0	1	0	0	1	0	2	1	2	3	2	0	2	0	0	3	2	1	0	1	1	Bacteria|Bacteroidetes|Bacteroidia|Bacteroidales|S24-7
389282	#N/A	#N/A	#N/A	#N/A	#N/A	#N/A	22	0.420084	0	5177	34	13	167	2431	103	478	889	469	1512	16	4157	234	53	61	865	4197	216	1978	66	844	67	34	1556	Bacteria|Bacteroidetes|Bacteroidia|Bacteroidales|S24-7
3412718	10	0	0	#N/A	#N/A	#N/A	#N/A	#N/A	#N/A	448	163	65	156	0	327	114	0	0	0	0	0	304	0	49	238	270	0	0	1	0	0	0	0	Bacteria|Firmicutes|Clostridia|Clostridiales|Ruminococcaceae
346870	27	-1	0	9	1.57205	0	#N/A	#N/A	#N/A	79	17	11	21	51	11	22	14	4	47	55	44	27	25	21	14	58	13	99	131	18	32	43	25	Bacteria|Bacteroidetes|Bacteroidia|Bacteroidales|S24-7
589114	1	-0.320408	0	13	-1.02062	0	#N/A	#N/A	#N/A	0	0	1	0	0	1	1	2	1	1	3	1	0	1	2	0	1	0	4	0	0	0	2	0	Bacteria|Firmicutes|Bacilli|Lactobacillales|Lactobacillaceae|Lactobacillus
189406	#N/A	#N/A	#N/A	#N/A	#N/A	#N/A	6	1.86847	0	0	0	0	0	0	0	0	0	2	0	1	1	2	0	0	0	0	1	1	1	0	0	0	1	Bacteria|Firmicutes|Clostridia|Clostridiales|Ruminococcaceae|Oscillospira
588429	3	-0.974176	0	2	0.48795	0.32	14	-0.738997	0	1	4	3	2	2	0	2	1	0	3	13	0	1	2	0	0	3	0	1	3	0	0	2	4	Bacteria|Firmicutes|Clostridia|Clostridiales|Lachnospiraceae
405425	#N/A	#N/A	#N/A	#N/A	#N/A	#N/A	#N/A	#N/A	#N/A	0	0	0	2	0	0	0	0	0	0	0	0	0	0	0	0	0	0	0	0	0	0	0	0	Bacteria|Proteobacteria|Gammaproteobacteria|Pseudomonadales|Moraxellaceae|Acinetobacter
190063	#N/A	#N/A	#N/A	#N/A	#N/A	#N/A	#N/A	#N/A	#N/A	0	0	0	0	0	0	0	0	0	0	0	0	0	0	0	0	0	0	0	2	0	0	0	1	Bacteria|Firmicutes|Clostridia|Clostridiales
214835	#N/A	#N/A	#N/A	#N/A	#N/A	#N/A	#N/A	#N/A	#N/A	0	0	2	0	0	0	0	0	0	1	0	0	0	0	0	0	0	1	0	0	0	0	0	0	Bacteria|Firmicutes|Clostridia|Clostridiales|Lachnospiraceae
470117	#N/A	#N/A	#N/A	#N/A	#N/A	#N/A	#N/A	#N/A	#N/A	0	0	0	0	0	0	0	0	0	0	0	0	0	0	0	0	0	0	3	0	0	0	0	0	Bacteria|Firmicutes|Clostridia|Clostridiales|Ruminococcaceae|Clostridium|methylpentosum
4440970	#N/A	#N/A	#N/A	#N/A	#N/A	#N/A	#N/A	#N/A	#N/A	0	0	0	0	0	0	0	0	0	0	7	0	1	0	0	0	0	0	0	0	0	0	0	0	Bacteria|TM7|TM7-3|CW040|F16
791522	#N/A	#N/A	#N/A	#N/A	#N/A	#N/A	#N/A	#N/A	#N/A	0	0	0	0	0	0	0	0	0	0	0	0	0	0	0	1	0	0	0	0	0	0	0	0	Bacteria|Firmicutes|Clostridia|Clostridiales|Lachnospiraceae
323583	52	0	0	#N/A	#N/A	#N/A	#N/A	#N/A	#N/A	5	25	5	4	2	2	23	2	5	1	4	1	0	0	2	2	0	2	7	0	2	6	0	1	Bacteria|Firmicutes|Clostridia|Clostridiales|Ruminococcaceae|Ruminococcus
445144	1	0.195805	0.375	0	0.136083	0	#N/A	#N/A	#N/A	0	0	0	0	2	1	1	4	0	1	1	2	0	0	2	1	14	2	8	7	9	1	0	4	Bacteria|Bacteroidetes|Bacteroidia|Bacteroidales|S24-7
184753	#N/A	#N/A	#N/A	11	-0.312348	0	#N/A	#N/A	#N/A	4	12	10	20	5	13	14	10	8	25	0	22	21	13	8	9	13	11	0	5	4	5	21	3	Bacteria|Bacteroidetes|Bacteroidia|Bacteroidales|Bacteroidaceae|Bacteroides
183839	#N/A	#N/A	#N/A	#N/A	#N/A	#N/A	#N/A	#N/A	#N/A	0	0	0	0	0	0	0	0	0	0	0	0	0	0	0	0	1	0	0	0	0	0	0	0	Bacteria|Firmicutes|Clostridia|Clostridiales|Lachnospiraceae
80664	#N/A	#N/A	#N/A	#N/A	#N/A	#N/A	#N/A	#N/A	#N/A	0	0	0	0	0	0	0	0	0	0	0	0	0	0	0	0	0	0	0	0	1	0	0	0	Bacteria|Proteobacteria|Gammaproteobacteria|Pseudomonadales|Moraxellaceae
593216	#N/A	#N/A	#N/A	#N/A	#N/A	#N/A	30	0	0	0	5	0	5	5	0	0	0	0	0	2	11	3	9	0	1	35	10	6	2	5	0	1	1	Bacteria|Firmicutes|Clostridia|Clostridiales|Clostridiaceae|Clostridium
261563	#N/A	#N/A	#N/A	#N/A	#N/A	#N/A	#N/A	#N/A	#N/A	0	0	0	0	0	1	0	0	0	0	0	1	0	0	0	0	0	0	0	0	0	0	0	1	Bacteria|Firmicutes|Clostridia|Clostridiales
186841	#N/A	#N/A	#N/A	#N/A	#N/A	#N/A	#N/A	#N/A	#N/A	1	2	0	1	2	2	0	0	0	0	0	1	0	0	0	0	0	0	1	3	0	0	0	0	Bacteria|Bacteroidetes|Bacteroidia|Bacteroidales|Bacteroidaceae|Bacteroides
330116	#N/A	#N/A	#N/A	#N/A	#N/A	#N/A	#N/A	#N/A	#N/A	0	0	0	0	0	0	1	0	0	0	0	0	0	0	0	0	0	0	0	0	0	0	1	0	Bacteria|Firmicutes|Clostridia|Clostridiales|Lachnospiraceae|[Ruminococcus]|gnavus
345330	6	0.0879316	0	3	-1.10068	0	6	-0.979806	0	1	1	1	0	1	1	0	0	0	1	4	1	2	4	0	2	2	1	1	3	3	0	0	1	Bacteria|Bacteroidetes|Bacteroidia|Bacteroidales|S24-7
270758	#N/A	#N/A	#N/A	#N/A	#N/A	#N/A	#N/A	#N/A	#N/A	0	4	0	11	0	0	0	0	0	0	6	43	0	0	0	0	0	0	1	7	0	0	0	5	Bacteria|Firmicutes|Clostridia|Clostridiales|Lachnospiraceae|[Ruminococcus]|gnavus
327116	#N/A	#N/A	#N/A	30	0	0	6	0.159503	0	0	7	6	0	0	1	0	0	1	1	2	0	2	0	1	0	0	0	0	1	1	2	20	5	Bacteria|Firmicutes|Clostridia|Clostridiales|Ruminococcaceae|Oscillospira
821080	#N/A	#N/A	#N/A	#N/A	#N/A	#N/A	#N/A	#N/A	#N/A	0	0	0	0	0	0	0	0	0	0	0	18	0	0	0	0	0	0	0	0	0	0	0	0	Bacteria|Proteobacteria|Gammaproteobacteria|Enterobacteriales|Enterobacteriaceae
277574	#N/A	#N/A	#N/A	#N/A	#N/A	#N/A	#N/A	#N/A	#N/A	0	1	0	0	0	1	0	0	0	0	0	1	0	0	0	0	0	0	0	0	0	0	0	0	Bacteria|Firmicutes|Clostridia|Clostridiales
159007	#N/A	#N/A	#N/A	#N/A	#N/A	#N/A	#N/A	#N/A	#N/A	0	0	0	0	0	0	0	0	0	0	0	1	0	0	0	0	0	0	0	0	0	0	0	0	Bacteria|Firmicutes|Clostridia|Clostridiales
167509	25	0	0	#N/A	#N/A	#N/A	2	-0.0692178	0	0	2	0	0	3	0	2	1	0	1	1	2	0	0	0	0	1	3	1	1	2	0	0	0	Bacteria|Firmicutes|Clostridia|Clostridiales|Ruminococcaceae|Oscillospira
328554	#N/A	#N/A	#N/A	#N/A	#N/A	#N/A	#N/A	#N/A	#N/A	0	0	0	0	0	0	0	0	0	0	0	0	0	0	0	0	0	0	0	0	0	0	0	4	Bacteria|Firmicutes|Clostridia|Clostridiales|Ruminococcaceae
293975	#N/A	#N/A	#N/A	#N/A	#N/A	#N/A	#N/A	#N/A	#N/A	0	1	0	0	0	0	0	0	0	0	0	0	0	1	0	0	0	0	0	0	0	0	0	0	Bacteria|Firmicutes|Clostridia|Clostridiales|Lachnospiraceae
749563	#N/A	#N/A	#N/A	#N/A	#N/A	#N/A	#N/A	#N/A	#N/A	0	0	0	0	0	0	0	0	0	0	0	0	0	0	0	1	0	0	0	0	0	0	0	0	Bacteria|Actinobacteria|Actinobacteria|Actinomycetales|Microbacteriaceae
261365	#N/A	#N/A	#N/A	#N/A	#N/A	#N/A	#N/A	#N/A	#N/A	0	0	1	0	0	0	0	0	0	0	1	0	0	0	0	0	0	0	0	1	0	0	0	0	Bacteria|Firmicutes|Clostridia|Clostridiales|Ruminococcaceae|Ruminococcus
185570	#N/A	#N/A	#N/A	#N/A	#N/A	#N/A	#N/A	#N/A	#N/A	0	0	0	0	0	0	0	0	0	0	1	0	0	0	0	0	0	0	0	0	0	0	0	0	Bacteria|Firmicutes|Clostridia|Clostridiales|Lachnospiraceae|[Ruminococcus]|gnavus
269415	30	1.73205	0	5	1.43637	0	0	-1.20731	0.5	8	12	11	5	4	2	4	3	6	15	16	15	14	13	1	4	14	1	12	14	3	1	3	1	Bacteria|Bacteroidetes|Bacteroidia|Bacteroidales|S24-7
269418	#N/A	#N/A	#N/A	0	-0.544331	0	#N/A	#N/A	#N/A	1	0	0	0	0	0	0	3	1	0	0	0	1	1	0	1	0	0	2	2	1	0	0	0	Bacteria|Firmicutes|Clostridia|Clostridiales|Ruminococcaceae
336214	12	-1.15204	0	#N/A	#N/A	#N/A	#N/A	#N/A	#N/A	36	88	97	81	88	790	169	39	55	1038	2642	115	217	55	574	381	79	179	1427	182	86	441	279	23	Bacteria|Bacteroidetes|Bacteroidia|Bacteroidales|Rikenellaceae
273078	#N/A	#N/A	#N/A	#N/A	#N/A	#N/A	#N/A	#N/A	#N/A	0	0	0	0	0	0	0	0	0	0	0	0	0	0	0	0	0	0	0	1	0	0	0	0	Bacteria|Firmicutes|Clostridia|Clostridiales
4433720	#N/A	#N/A	#N/A	#N/A	#N/A	#N/A	#N/A	#N/A	#N/A	0	2	0	1	0	0	3	0	0	0	0	0	0	0	0	0	1	0	0	0	0	0	0	0	Bacteria|Firmicutes|Clostridia|Clostridiales|Clostridiaceae
350664	#N/A	#N/A	#N/A	#N/A	#N/A	#N/A	13	-1.13389	0	0	1	0	0	0	1	0	0	1	0	0	1	1	0	0	0	2	2	1	1	1	0	2	2	Bacteria|Firmicutes|Clostridia|Clostridiales|Lachnospiraceae|[Ruminococcus]|gnavus
534926	21	-0.591608	0	1	-0.237775	0.444444	#N/A	#N/A	#N/A	0	5	0	4	4	0	2	2	0	0	8	2	3	5	0	10	0	5	12	0	0	0	0	8	Bacteria|Firmicutes|Clostridia|Clostridiales|Lachnospiraceae|Anaerostipes
196947	3	-0.354246	0	5	-1.02598	0	15	1.14018	0	5480	16880	22139	13460	17339	17	21997	6112	2642	7394	9977	5689	8981	4577	5302	5024	2021	10184	17414	10107	22974	16403	8088	10845	Bacteria|Bacteroidetes|Bacteroidia|Bacteroidales|[Paraprevotellaceae]|[Prevotella]
376397	#N/A	#N/A	#N/A	#N/A	#N/A	#N/A	#N/A	#N/A	#N/A	0	0	0	1	0	0	0	0	0	0	0	0	0	0	0	0	0	0	0	0	0	0	0	0	Bacteria|Firmicutes|Clostridia|Clostridiales|Peptococcaceae
349024	#N/A	#N/A	#N/A	15	0	0.56	#N/A	#N/A	#N/A	0	0	0	0	0	0	0	0	0	2	1	1	0	1	0	0	0	0	0	0	0	0	3	0	Bacteria|Firmicutes|Bacilli|Lactobacillales|Streptococcaceae|Streptococcus
387615	#N/A	#N/A	#N/A	21	0.144338	0	5	0.0723954	0	0	2	2	0	0	0	1	0	0	0	3	1	0	1	1	0	0	1	2	3	0	4	1	3	Bacteria|Firmicutes|Clostridia|Clostridiales|Ruminococcaceae|Oscillospira
190242	#N/A	#N/A	#N/A	#N/A	#N/A	#N/A	#N/A	#N/A	#N/A	0	1	0	0	0	0	0	1	0	0	0	0	0	0	2	1	1	0	0	3	0	0	0	0	Bacteria|Firmicutes|Clostridia|Clostridiales|Ruminococcaceae|Ruminococcus
185888	#N/A	#N/A	#N/A	#N/A	#N/A	#N/A	#N/A	#N/A	#N/A	0	0	0	0	0	0	0	0	0	0	0	0	0	0	0	0	0	1	0	0	1	0	0	0	Bacteria|Bacteroidetes|Bacteroidia|Bacteroidales|Bacteroidaceae|Bacteroides
349153	#N/A	#N/A	#N/A	28	0	0	9	-0.490466	0	1	3	4	4	0	0	7	3	0	11	2	0	0	0	4	2	1	5	3	0	0	3	0	2	Bacteria|Firmicutes|Clostridia|Clostridiales
694641	#N/A	#N/A	#N/A	#N/A	#N/A	#N/A	#N/A	#N/A	#N/A	0	1	0	0	0	0	0	0	0	0	0	0	0	2	0	0	0	0	0	0	0	0	0	0	Bacteria|Firmicutes|Clostridia|Clostridiales|Lachnospiraceae
292203	#N/A	#N/A	#N/A	#N/A	#N/A	#N/A	2	-0.747553	0	0	2	0	0	0	0	0	0	0	0	0	2	1	3	0	0	18	2	0	0	0	2	0	2	Bacteria|Firmicutes|Bacilli|Lactobacillales|Leuconostocaceae
1108747	#N/A	#N/A	#N/A	#N/A	#N/A	#N/A	#N/A	#N/A	#N/A	0	0	0	0	0	0	0	0	0	0	0	0	0	0	0	0	0	0	0	0	0	0	0	7	Bacteria|Tenericutes|Mollicutes|RF39
551822	#N/A	#N/A	#N/A	#N/A	#N/A	#N/A	#N/A	#N/A	#N/A	0	0	0	0	0	0	0	0	0	1	0	0	0	0	0	0	0	0	0	0	0	0	0	0	Bacteria|Firmicutes|Clostridia|Clostridiales|Clostridiaceae
352533	#N/A	#N/A	#N/A	#N/A	#N/A	#N/A	#N/A	#N/A	#N/A	0	0	0	0	0	0	0	0	0	0	0	0	0	0	0	1	1	0	1	0	0	0	0	0	Bacteria|Firmicutes|Clostridia|Clostridiales
362947	#N/A	#N/A	#N/A	#N/A	#N/A	#N/A	#N/A	#N/A	#N/A	0	0	0	0	0	0	0	0	0	0	0	0	0	1	0	0	0	0	0	0	0	0	0	0	Bacteria|Firmicutes|Clostridia|Clostridiales|Lachnospiraceae|Roseburia|faecis
1109662	#N/A	#N/A	#N/A	#N/A	#N/A	#N/A	#N/A	#N/A	#N/A	0	0	0	0	0	0	0	0	0	0	1	0	0	1	0	0	0	0	0	0	0	0	0	0	Bacteria|Firmicutes|Clostridia|Clostridiales|[Mogibacteriaceae]
1084865	5	-0.625543	0	4	0.576072	0	7	-1.016	0	2	4	1	1	0	1	7	3	0	0	2	2	1	0	1	2	5	0	4	0	0	1	17	0	Bacteria|Firmicutes|Bacilli|Bacillales|Staphylococcaceae|Staphylococcus
531436	#N/A	#N/A	#N/A	#N/A	#N/A	#N/A	#N/A	#N/A	#N/A	0	0	0	0	0	0	0	0	0	0	1	0	0	1	0	0	0	0	0	0	0	0	0	0	Bacteria|Firmicutes|Clostridia|Clostridiales|Lachnospiraceae|Roseburia
186332	#N/A	#N/A	#N/A	#N/A	#N/A	#N/A	#N/A	#N/A	#N/A	1	1	0	0	0	0	0	1	0	0	0	1	1	0	0	0	0	0	0	0	0	0	1	0	Bacteria|Firmicutes|Clostridia|Clostridiales|Lachnospiraceae|[Ruminococcus]|gnavus
173892	#N/A	#N/A	#N/A	#N/A	#N/A	#N/A	#N/A	#N/A	#N/A	1	0	1	0	0	0	1	0	0	0	0	0	0	0	0	0	0	0	2	0	0	0	0	0	Bacteria|Firmicutes|Clostridia|Clostridiales|Lachnospiraceae
371930	#N/A	#N/A	#N/A	#N/A	#N/A	#N/A	#N/A	#N/A	#N/A	42	1	49	19	109	1	74	213	0	64	26	1	13	54	44	103	155	0	51	178	15	0	4	111	Bacteria|Firmicutes|Clostridia|Clostridiales
274455	#N/A	#N/A	#N/A	#N/A	#N/A	#N/A	#N/A	#N/A	#N/A	0	2	0	2	0	2	0	0	0	0	0	0	0	0	2	1	0	0	0	0	0	1	0	0	Bacteria|Firmicutes|Clostridia|Clostridiales|Lachnospiraceae|Coprococcus
459025	#N/A	#N/A	#N/A	#N/A	#N/A	#N/A	#N/A	#N/A	#N/A	0	0	0	0	0	0	0	0	0	0	0	0	0	1	0	0	0	0	0	0	0	0	0	0	Bacteria|Firmicutes|Clostridia|Clostridiales
3272632	#N/A	#N/A	#N/A	#N/A	#N/A	#N/A	#N/A	#N/A	#N/A	0	0	0	0	0	0	0	0	0	0	0	0	0	0	0	0	0	0	0	0	0	0	1	0	Bacteria|Bacteroidetes|Bacteroidia|Bacteroidales|Bacteroidaceae|Bacteroides
263876	17	2.24781	0.21875	#N/A	#N/A	#N/A	15	2.28035	0	17	22	16	3	16	13	29	21	3	30	1	18	11	1	0	19	16	13	4	18	3	13	11	5	Bacteria|Firmicutes|Clostridia|Clostridiales
267996	#N/A	#N/A	#N/A	#N/A	#N/A	#N/A	#N/A	#N/A	#N/A	0	0	1	0	0	0	0	0	0	0	0	0	0	0	0	0	0	0	0	0	0	0	0	0	Bacteria|Firmicutes|Clostridia|Clostridiales|Lachnospiraceae|[Ruminococcus]|gnavus
346267	0	0.278128	0	1	-1.01055	0	0	-1.20731	0	3	0	0	2	2	1	1	1	0	3	0	0	2	5	2	2	7	6	4	14	2	3	4	3	Bacteria|Bacteroidetes|Bacteroidia|Bacteroidales|S24-7
216710	#N/A	#N/A	#N/A	#N/A	#N/A	#N/A	#N/A	#N/A	#N/A	0	0	0	0	0	0	0	0	0	0	0	0	0	0	1	0	0	0	0	1	0	0	0	0	Bacteria|Firmicutes|Clostridia|Clostridiales|Ruminococcaceae
271242	#N/A	#N/A	#N/A	#N/A	#N/A	#N/A	#N/A	#N/A	#N/A	0	0	0	0	0	0	0	0	0	0	0	0	0	0	0	0	0	0	0	1	0	0	0	0	Bacteria|Firmicutes|Clostridia|Clostridiales
180879	#N/A	#N/A	#N/A	#N/A	#N/A	#N/A	#N/A	#N/A	#N/A	0	1	1	0	1	0	0	0	0	0	0	0	0	1	1	1	0	0	1	0	0	0	0	0	Bacteria|Firmicutes|Clostridia|Clostridiales|Ruminococcaceae|Oscillospira
278753	3	-0.354246	0	#N/A	#N/A	#N/A	#N/A	#N/A	#N/A	3	5	1	0	4	0	6	2	0	1	3	3	0	0	0	0	0	0	1	0	0	2	1	0	Bacteria|Firmicutes|Clostridia|Clostridiales
540940	2	-0.44643	0	#N/A	#N/A	#N/A	8	-0.408248	0	3	2	0	0	1	1	0	1	1	2	1	0	1	1	0	1	5	2	2	0	1	1	2	1	Bacteria|Firmicutes|Bacilli|Lactobacillales|Leuconostocaceae|Leuconostoc
260018	#N/A	#N/A	#N/A	#N/A	#N/A	#N/A	#N/A	#N/A	#N/A	0	0	0	0	0	0	1	0	0	1	0	0	0	0	0	1	0	0	0	0	0	2	2	0	Bacteria|Firmicutes|Clostridia|Clostridiales
186057	#N/A	#N/A	#N/A	#N/A	#N/A	#N/A	#N/A	#N/A	#N/A	1	0	0	0	0	0	1	0	2	0	0	0	0	0	0	0	8	0	0	0	0	0	0	1	Bacteria|Firmicutes|Clostridia|Clostridiales
275616	20	-1.23443	0.625	#N/A	#N/A	#N/A	12	-0.520483	0	1	6	7	1	5	3	6	1	0	2	9	0	0	4	0	0	2	2	0	9	0	11	5	9	Bacteria|Firmicutes|Clostridia|Clostridiales|Ruminococcaceae|Oscillospira
211820	#N/A	#N/A	#N/A	#N/A	#N/A	#N/A	#N/A	#N/A	#N/A	0	0	0	0	0	0	0	0	0	0	0	0	0	0	0	0	0	0	1	0	0	0	0	0	Bacteria|Bacteroidetes|Bacteroidia|Bacteroidales|S24-7
280706	#N/A	#N/A	#N/A	#N/A	#N/A	#N/A	#N/A	#N/A	#N/A	0	0	0	0	0	0	0	0	0	0	0	0	0	0	0	0	1	0	0	0	0	0	0	0	Bacteria|Proteobacteria|Gammaproteobacteria|Enterobacteriales|Enterobacteriaceae|Citrobacter
1076316	#N/A	#N/A	#N/A	#N/A	#N/A	#N/A	#N/A	#N/A	#N/A	0	0	0	0	0	0	0	0	0	0	0	0	0	0	0	0	0	1	0	0	0	0	0	0	Bacteria|Firmicutes|Bacilli|Bacillales|Staphylococcaceae|Staphylococcus
418501	#N/A	#N/A	#N/A	#N/A	#N/A	#N/A	#N/A	#N/A	#N/A	0	0	0	0	0	0	0	0	0	0	1	0	0	0	0	0	0	0	0	0	0	0	0	0	Bacteria|Bacteroidetes|Bacteroidia|Bacteroidales|Rikenellaceae|AF12
335267	20	-0.308607	0	#N/A	#N/A	#N/A	#N/A	#N/A	#N/A	2	1	1	0	3	1	1	0	1	0	0	0	0	0	0	0	2	0	0	1	4	0	1	1	Bacteria|Firmicutes|Clostridia|Clostridiales
331772	18	1.71435	0.197531	10	0	0	8	-1.22474	0	18	37	18	33	48	25	33	20	3	41	32	70	51	50	25	19	40	31	64	120	28	35	35	23	Bacteria|Bacteroidetes|Bacteroidia|Bacteroidales|S24-7
157327	18	-0.0504219	0	#N/A	#N/A	#N/A	#N/A	#N/A	#N/A	2	3	1	1	1	5	2	0	2	8	0	2	1	1	9	4	6	5	0	4	3	4	4	3	Bacteria|Bacteroidetes|Bacteroidia|Bacteroidales|Bacteroidaceae|Bacteroides
263662	#N/A	#N/A	#N/A	#N/A	#N/A	#N/A	#N/A	#N/A	#N/A	0	0	0	0	0	0	0	0	0	0	0	0	0	0	0	0	1	0	0	0	0	0	0	0	Bacteria|Bacteroidetes|Bacteroidia|Bacteroidales|S24-7
356226	9	0.215666	0	#N/A	#N/A	#N/A	2	1.28745	0.277778	239	88	3	90	57	135	33	129	33	343	346	489	411	0	104	89	782	247	845	525	383	106	0	101	Bacteria|Bacteroidetes|Bacteroidia|Bacteroidales|S24-7
186714	#N/A	#N/A	#N/A	#N/A	#N/A	#N/A	#N/A	#N/A	#N/A	0	0	1	0	1	0	0	0	0	0	0	0	0	0	0	1	0	0	1	1	0	0	0	0	Bacteria|Bacteroidetes|Bacteroidia|Bacteroidales|[Paraprevotellaceae]|[Prevotella]
197706	#N/A	#N/A	#N/A	#N/A	#N/A	#N/A	0	1.13025	0	0	0	0	0	0	1	0	3	0	1	0	0	0	1	0	0	1	1	2	3	0	0	0	0	Bacteria|Firmicutes|Clostridia|Clostridiales
352624	#N/A	#N/A	#N/A	#N/A	#N/A	#N/A	#N/A	#N/A	#N/A	0	0	0	0	0	0	0	0	0	0	0	0	0	0	0	0	0	0	0	0	1	0	0	0	Bacteria|Firmicutes|Clostridia|Clostridiales
967275	#N/A	#N/A	#N/A	#N/A	#N/A	#N/A	#N/A	#N/A	#N/A	9	0	0	1	0	0	0	0	0	0	0	0	0	0	0	0	1	0	0	0	0	0	0	0	Bacteria|Proteobacteria|Gammaproteobacteria|Xanthomonadales|Xanthomonadaceae|Stenotrophomonas|geniculata
187959	#N/A	#N/A	#N/A	#N/A	#N/A	#N/A	#N/A	#N/A	#N/A	0	0	0	0	0	0	0	0	0	0	0	0	0	0	0	0	0	0	2	0	0	0	0	0	Bacteria|Bacteroidetes|Bacteroidia|Bacteroidales|S24-7
343853	51	0	0	9	0.60992	0	20	1.41421	0	866	193	234	267	890	379	68	179	20	86	273	191	191	273	1151	219	523	158	516	344	206	182	23	555	Bacteria|Bacteroidetes|Bacteroidia|Bacteroidales|S24-7
268125	8	0	0	11	1.24939	0.32	#N/A	#N/A	#N/A	991	2	0	173	716	1	1561	4	0	4683	356	16	76	0	0	0	0	0	0	1	0	1357	26	0	Bacteria|Firmicutes|Clostridia|Clostridiales|Lachnospiraceae|[Ruminococcus]|gnavus
268124	#N/A	#N/A	#N/A	#N/A	#N/A	#N/A	#N/A	#N/A	#N/A	0	0	17	0	0	0	0	0	0	0	0	0	0	0	0	0	2	0	0	0	0	20	0	0	Bacteria|Firmicutes|Clostridia|Clostridiales
572860	35	0	0	#N/A	#N/A	#N/A	13	-1.13389	0	0	7	1	3	2	0	0	3	4	2	12	3	3	7	6	2	14	6	1	3	1	2	3	7	Bacteria|Firmicutes|Clostridia|Clostridiales
177237	#N/A	#N/A	#N/A	#N/A	#N/A	#N/A	#N/A	#N/A	#N/A	0	1	0	0	0	0	0	0	0	0	0	0	0	0	0	0	0	0	0	0	0	0	0	0	Bacteria|Firmicutes|Clostridia|Clostridiales|Lachnospiraceae|Roseburia
268121	49	0	0	#N/A	#N/A	#N/A	#N/A	#N/A	#N/A	1	1	0	1	0	0	1	0	1	0	0	0	2	0	0	0	0	2	0	0	1	0	0	0	Bacteria|Firmicutes|Clostridia|Clostridiales
588197	2	0.641742	0	#N/A	#N/A	#N/A	#N/A	#N/A	#N/A	8	12	1	28	48	49	0	2	0	4	0	2	5	0	1	12	6	6	8	9	0	24	0	4	Bacteria|Firmicutes|Bacilli|Lactobacillales|Lactobacillaceae|Lactobacillus
336810	#N/A	#N/A	#N/A	16	0	0	#N/A	#N/A	#N/A	1	0	0	1	2	0	0	0	0	0	1	0	1	2	1	0	0	0	2	1	0	0	0	0	Bacteria|Firmicutes|Clostridia|Clostridiales|Ruminococcaceae|Oscillospira
4483585	#N/A	#N/A	#N/A	#N/A	#N/A	#N/A	#N/A	#N/A	#N/A	0	0	0	0	0	0	0	0	0	0	2	0	0	1	14	0	0	0	0	3	0	0	0	0	Bacteria|Firmicutes|Clostridia|Clostridiales
185550	#N/A	#N/A	#N/A	#N/A	#N/A	#N/A	#N/A	#N/A	#N/A	0	0	0	0	0	0	1	0	0	0	0	0	0	0	0	0	0	0	0	0	0	0	0	0	Bacteria|Bacteroidetes|Bacteroidia|Bacteroidales|S24-7
263111	#N/A	#N/A	#N/A	3	-1.10068	0	2	-0.747553	0.444444	0	0	0	2	0	1	0	0	0	1	2	1	2	0	0	1	3	1	0	3	2	0	0	0	Bacteria|Bacteroidetes|Bacteroidia|Bacteroidales|S24-7
175939	#N/A	#N/A	#N/A	30	0	0	9	0.0891756	0	0	2	0	0	0	1	0	1	1	1	5	0	1	0	1	0	0	1	0	1	1	1	1	1	Bacteria|Firmicutes|Clostridia|Clostridiales|Ruminococcaceae|Oscillospira
279115	#N/A	#N/A	#N/A	#N/A	#N/A	#N/A	#N/A	#N/A	#N/A	0	0	0	0	0	0	1	1	0	1	0	0	1	0	1	0	0	0	1	0	0	0	0	0	Bacteria|Firmicutes|Clostridia|Clostridiales
196385	#N/A	#N/A	#N/A	#N/A	#N/A	#N/A	#N/A	#N/A	#N/A	0	0	0	0	1	0	0	0	0	0	0	0	0	0	0	0	1	0	0	0	0	0	0	0	Bacteria|Bacteroidetes|Bacteroidia|Bacteroidales|S24-7
585480	#N/A	#N/A	#N/A	1	-0.237775	0	6	3.00778	0	0	91	0	63	31	0	31	26	0	0	126	63	91	81	18	63	1	82	158	0	0	0	0	126	Bacteria|Firmicutes|Clostridia|Clostridiales|Lachnospiraceae|Anaerostipes
196386	#N/A	#N/A	#N/A	#N/A	#N/A	#N/A	8	0.408248	0	0	3	0	0	0	4	0	0	3	0	5	0	0	0	3	0	0	0	1	0	2	1	1	0	Bacteria|Bacteroidetes|Bacteroidia|Bacteroidales|Rikenellaceae
345804	#N/A	#N/A	#N/A	#N/A	#N/A	#N/A	#N/A	#N/A	#N/A	0	0	0	0	0	0	0	0	0	0	0	0	0	0	0	0	0	0	0	0	1	0	0	0	Bacteria|Firmicutes|Clostridia|Clostridiales|Ruminococcaceae
331117	#N/A	#N/A	#N/A	#N/A	#N/A	#N/A	#N/A	#N/A	#N/A	0	0	0	0	1	0	0	0	0	2	0	0	0	0	0	0	0	0	0	1	1	0	0	0	Bacteria|Firmicutes|Clostridia|Clostridiales
301012	#N/A	#N/A	#N/A	11	-0.312348	0	#N/A	#N/A	#N/A	0	0	0	0	0	0	0	0	0	0	1	0	0	19	109	1	0	0	0	30	0	0	0	9	Bacteria|Firmicutes|Clostridia|Clostridiales
761408	#N/A	#N/A	#N/A	10	1.87083	0	2	2.64412	0	0	5266	3109	197	3170	31	4597	10	3	1963	5665	8	411	0	388	162	1	0	230	2	4	4866	3386	1333	Bacteria|Firmicutes|Clostridia|Clostridiales
290253	#N/A	#N/A	#N/A	2	-1.26867	0.5	23	-1	0	466	1572	1052	260	1605	481	795	686	62	1357	4648	139	956	588	468	121	324	546	421	738	1170	820	955	191	Bacteria|Firmicutes|Clostridia|Clostridiales|Ruminococcaceae|Oscillospira
194710	#N/A	#N/A	#N/A	#N/A	#N/A	#N/A	#N/A	#N/A	#N/A	0	0	0	0	0	0	0	0	0	2	0	1	0	0	0	0	0	0	0	0	0	0	0	0	Bacteria|Bacteroidetes|Bacteroidia|Bacteroidales|S24-7
187956	#N/A	#N/A	#N/A	#N/A	#N/A	#N/A	#N/A	#N/A	#N/A	0	0	0	0	0	0	1	0	0	0	0	0	0	0	1	0	0	0	0	0	0	0	0	0	Bacteria|Firmicutes|Clostridia|Clostridiales|Clostridiaceae
268733	#N/A	#N/A	#N/A	#N/A	#N/A	#N/A	#N/A	#N/A	#N/A	0	0	0	1	0	0	1	0	0	0	0	0	0	0	0	0	0	0	0	0	0	0	0	0	Bacteria|Firmicutes|Clostridia|Clostridiales|Clostridiaceae
260927	#N/A	#N/A	#N/A	#N/A	#N/A	#N/A	#N/A	#N/A	#N/A	0	0	0	0	0	0	0	0	0	0	0	0	0	0	0	0	0	0	2	0	0	0	0	0	Bacteria|Bacteroidetes|Bacteroidia|Bacteroidales|S24-7
195934	#N/A	#N/A	#N/A	#N/A	#N/A	#N/A	#N/A	#N/A	#N/A	2	0	0	0	0	0	0	0	0	0	0	0	0	0	0	0	0	0	0	0	0	0	0	0	Bacteria|Firmicutes|Clostridia|Clostridiales
258438	#N/A	#N/A	#N/A	#N/A	#N/A	#N/A	#N/A	#N/A	#N/A	0	0	0	0	0	0	0	0	0	0	0	0	0	0	0	0	0	0	1	1	0	0	0	0	Bacteria|Firmicutes|Clostridia|Clostridiales
259920	#N/A	#N/A	#N/A	#N/A	#N/A	#N/A	#N/A	#N/A	#N/A	0	0	1	0	0	0	0	2	0	0	0	0	0	0	0	0	0	0	0	0	0	0	0	0	Bacteria|Firmicutes|Clostridia|Clostridiales|Ruminococcaceae
1082539	#N/A	#N/A	#N/A	#N/A	#N/A	#N/A	#N/A	#N/A	#N/A	0	0	0	0	0	0	0	1	0	0	0	1	0	0	0	0	0	0	1	0	0	0	0	1	Bacteria|Firmicutes|Bacilli|Lactobacillales|Streptococcaceae|Streptococcus
462585	#N/A	#N/A	#N/A	#N/A	#N/A	#N/A	#N/A	#N/A	#N/A	0	1	0	0	0	0	0	0	0	0	0	1	0	0	0	0	0	0	0	0	0	0	0	0	Bacteria|Firmicutes|Clostridia|Clostridiales|Lachnospiraceae
189843	#N/A	#N/A	#N/A	#N/A	#N/A	#N/A	#N/A	#N/A	#N/A	0	0	0	0	1	0	0	0	0	0	0	0	0	0	0	0	0	0	0	1	0	0	0	0	Bacteria|Firmicutes|Clostridia|Clostridiales
545038	#N/A	#N/A	#N/A	#N/A	#N/A	#N/A	#N/A	#N/A	#N/A	0	1	0	0	0	2	0	0	0	0	0	0	2	0	1	0	0	1	2	0	0	0	0	0	Bacteria|Firmicutes|Clostridia|Clostridiales|Peptostreptococcaceae
328905	#N/A	#N/A	#N/A	45	0	0	22	-1.26025	0.444444	0	0	0	2	0	8	0	4	0	0	2	9	0	8	27	1	4	6	38	37	0	1	3	0	Bacteria|Firmicutes|Clostridia|Clostridiales|Ruminococcaceae|Oscillospira
312515	#N/A	#N/A	#N/A	12	-0.801784	0	13	-0.125988	0	1	4	0	0	4	0	2	0	0	2	5	1	0	1	1	2	1	2	0	7	4	0	1	1	Bacteria|Firmicutes|Clostridia|Clostridiales|Ruminococcaceae|Oscillospira
851323	#N/A	#N/A	#N/A	#N/A	#N/A	#N/A	#N/A	#N/A	#N/A	0	1	0	2	0	0	0	0	0	0	0	0	1	0	0	0	0	1	0	0	0	0	0	0	Bacteria|Bacteroidetes|Bacteroidia|Bacteroidales|Porphyromonadaceae|Parabacteroides
356404	#N/A	#N/A	#N/A	#N/A	#N/A	#N/A	#N/A	#N/A	#N/A	1	0	0	0	0	4	0	1	0	1	0	0	0	2	2	0	0	0	3	5	0	1	0	0	Bacteria|Firmicutes|Clostridia|Clostridiales
398138	#N/A	#N/A	#N/A	25	-0.5	0	#N/A	#N/A	#N/A	2	0	0	0	0	0	0	0	0	5	1	0	0	2	4	0	0	1	0	0	0	0	3	1	Bacteria|Firmicutes|Clostridia|Clostridiales|Ruminococcaceae
228601	#N/A	#N/A	#N/A	9	2.29364	0.376543	16	-1.2395	0	8259	4994	6954	18019	13732	4644	27160	1688	900	4427	11572	4753	10949	11261	4433	13852	13984	40903	17370	8200	4685	6304	13542	1049	Bacteria|Bacteroidetes|Bacteroidia|Bacteroidales|Bacteroidaceae|Bacteroides
267905	#N/A	#N/A	#N/A	#N/A	#N/A	#N/A	#N/A	#N/A	#N/A	0	0	0	0	0	0	0	1	0	0	0	0	0	1	0	0	0	0	1	0	1	0	1	0	Bacteria|Firmicutes|Clostridia|Clostridiales|Ruminococcaceae
355175	2	-0.44643	0	#N/A	#N/A	#N/A	#N/A	#N/A	#N/A	0	1	0	0	4	2	0	2	0	2	9	0	0	0	7	0	2	1	8	16	4	8	0	6	Bacteria|Firmicutes|Clostridia|Clostridiales|Lachnospiraceae
338258	50	0	0	12	0	0	0	0.462375	0	1636	1001	804	735	603	182	458	255	27	1534	1234	1314	1160	1071	421	359	557	516	1656	747	184	229	228	193	Bacteria|Bacteroidetes|Bacteroidia|Bacteroidales|S24-7
182758	#N/A	#N/A	#N/A	#N/A	#N/A	#N/A	#N/A	#N/A	#N/A	0	0	0	0	0	0	0	0	0	0	0	0	0	0	0	0	0	0	0	0	0	0	1	0	Bacteria|Firmicutes|Bacilli|Lactobacillales|Lactobacillaceae|Lactobacillus
180264	#N/A	#N/A	#N/A	#N/A	#N/A	#N/A	#N/A	#N/A	#N/A	0	0	0	0	0	0	0	0	0	0	0	0	0	0	6	0	0	0	0	0	0	0	0	0	Bacteria|Firmicutes|Clostridia|Clostridiales
358112	#N/A	#N/A	#N/A	#N/A	#N/A	#N/A	#N/A	#N/A	#N/A	0	0	0	0	0	0	0	0	0	0	0	0	0	0	0	0	0	0	0	0	0	0	0	1	Bacteria|Firmicutes|Clostridia|Clostridiales
276561	#N/A	#N/A	#N/A	#N/A	#N/A	#N/A	#N/A	#N/A	#N/A	1	0	0	0	0	0	1	0	11	0	0	0	0	0	0	0	24	0	0	0	0	0	0	10	Bacteria|Firmicutes|Clostridia|Clostridiales|Ruminococcaceae
188674	#N/A	#N/A	#N/A	4	-0.230429	0.5	16	-0.381385	0	0	0	1	1	0	0	0	0	0	3	1	1	1	2	1	1	3	0	1	0	1	0	1	0	Bacteria|Firmicutes|Clostridia|Clostridiales|Lachnospiraceae|[Ruminococcus]|gnavus
267743	#N/A	#N/A	#N/A	#N/A	#N/A	#N/A	#N/A	#N/A	#N/A	0	0	1	0	0	0	0	1	0	0	0	0	0	0	0	0	0	0	1	0	1	1	0	0	Bacteria|Firmicutes|Clostridia|Clostridiales
309916	8	0	0	18	1	0	2	1.28745	0.277778	2	2	0	0	0	2	0	1	5	8	13	2	7	3	1	3	10	1	1	1	1	0	6	4	Bacteria|Firmicutes|Clostridia|Clostridiales|Lachnospiraceae|[Ruminococcus]|gnavus
258508	#N/A	#N/A	#N/A	#N/A	#N/A	#N/A	#N/A	#N/A	#N/A	0	0	0	0	0	0	0	0	0	0	0	0	0	0	0	0	3	0	3	4	0	0	0	0	Bacteria|Firmicutes|Clostridia|Clostridiales
314922	#N/A	#N/A	#N/A	#N/A	#N/A	#N/A	#N/A	#N/A	#N/A	0	0	0	0	0	0	0	1	0	0	0	0	0	0	0	0	0	0	0	0	0	0	0	0	Bacteria|Firmicutes|Clostridia|Clostridiales
266694	#N/A	#N/A	#N/A	#N/A	#N/A	#N/A	#N/A	#N/A	#N/A	0	1	0	0	0	0	0	0	0	0	0	0	0	0	0	0	0	0	0	0	0	0	0	0	Bacteria|Firmicutes|Clostridia|Clostridiales
184387	#N/A	#N/A	#N/A	#N/A	#N/A	#N/A	#N/A	#N/A	#N/A	0	0	0	0	0	0	0	0	0	0	0	0	0	0	0	0	0	0	0	0	0	0	0	1	Bacteria|Firmicutes|Clostridia|Clostridiales|Ruminococcaceae
351449	#N/A	#N/A	#N/A	#N/A	#N/A	#N/A	#N/A	#N/A	#N/A	0	0	0	0	0	3	0	3	0	0	0	0	0	3	0	1	0	1	0	2	0	0	1	0	Bacteria|Firmicutes|Clostridia|Clostridiales
354800	#N/A	#N/A	#N/A	#N/A	#N/A	#N/A	#N/A	#N/A	#N/A	0	0	2	38	0	0	0	0	0	0	232	0	0	22	0	0	0	544	201	2	30	29	64	39	Bacteria|Firmicutes|Clostridia|Clostridiales|Lachnospiraceae
342786	#N/A	#N/A	#N/A	#N/A	#N/A	#N/A	#N/A	#N/A	#N/A	27	0	0	0	0	0	0	0	0	0	0	0	0	0	0	0	0	0	0	0	0	98	0	0	Bacteria|Firmicutes|Clostridia|Clostridiales
4424408	57	0	0	#N/A	#N/A	#N/A	3	-0.214886	0	4	2	5	3	2	7	1	6	32	5	0	6	3	1	9	8	10	3	0	1	0	1	4	10	Bacteria|Bacteroidetes|Bacteroidia|Bacteroidales|Bacteroidaceae|Bacteroides
183662	#N/A	#N/A	#N/A	#N/A	#N/A	#N/A	#N/A	#N/A	#N/A	0	0	3	0	0	0	2	0	0	0	0	0	4	0	0	0	0	1	0	0	1	0	2	0	Bacteria|Bacteroidetes|Bacteroidia|Bacteroidales|Bacteroidaceae|Bacteroides
180468	#N/A	#N/A	#N/A	#N/A	#N/A	#N/A	#N/A	#N/A	#N/A	0	0	0	0	0	0	0	0	0	0	0	1	0	0	1	0	1	0	0	4	2	0	0	0	Bacteria|Firmicutes|Clostridia|Clostridiales|Ruminococcaceae|Oscillospira
303184	#N/A	#N/A	#N/A	#N/A	#N/A	#N/A	#N/A	#N/A	#N/A	0	0	2	0	1	0	0	0	0	0	0	0	0	0	0	0	0	0	1	0	0	0	0	0	Bacteria|Firmicutes|Clostridia|Clostridiales
180312	#N/A	#N/A	#N/A	#N/A	#N/A	#N/A	#N/A	#N/A	#N/A	0	0	0	0	0	0	0	0	0	0	1	0	0	0	0	0	0	0	0	0	0	0	0	0	Bacteria|Firmicutes|Clostridia|Clostridiales|Lachnospiraceae
372622	#N/A	#N/A	#N/A	#N/A	#N/A	#N/A	#N/A	#N/A	#N/A	0	0	0	0	2	0	0	0	0	1	0	0	0	0	0	0	0	0	0	0	0	0	0	0	Bacteria|Firmicutes|Clostridia|Clostridiales|Lachnospiraceae|Coprococcus
304408	#N/A	#N/A	#N/A	#N/A	#N/A	#N/A	#N/A	#N/A	#N/A	0	0	0	0	0	0	0	0	0	5	0	1	0	0	0	0	0	0	0	0	4	1	9	0	Bacteria|Bacteroidetes|Bacteroidia|Bacteroidales|S24-7
259212	#N/A	#N/A	#N/A	#N/A	#N/A	#N/A	#N/A	#N/A	#N/A	0	0	0	0	0	1	1	0	0	0	0	0	1	0	0	0	1	0	0	0	0	0	0	0	Bacteria|Firmicutes|Clostridia|Clostridiales|Clostridiaceae
16086	#N/A	#N/A	#N/A	#N/A	#N/A	#N/A	#N/A	#N/A	#N/A	0	0	0	0	0	0	0	0	0	0	0	0	1	0	0	0	0	0	0	0	0	0	0	0	Bacteria|Firmicutes|Clostridia|Clostridiales|Christensenellaceae
337762	#N/A	#N/A	#N/A	#N/A	#N/A	#N/A	#N/A	#N/A	#N/A	0	0	0	0	0	0	0	0	0	0	0	0	0	0	0	0	0	0	0	1	0	0	0	0	Bacteria|Firmicutes|Clostridia|Clostridiales|Ruminococcaceae|Ruminococcus
346764	#N/A	#N/A	#N/A	#N/A	#N/A	#N/A	#N/A	#N/A	#N/A	0	0	0	0	0	0	0	0	0	0	1	0	0	0	0	0	0	0	0	0	0	0	0	0	Bacteria|Firmicutes|Clostridia|Clostridiales
263933	#N/A	#N/A	#N/A	#N/A	#N/A	#N/A	#N/A	#N/A	#N/A	0	0	0	0	0	0	0	0	0	0	0	0	0	0	0	56	0	0	0	0	0	0	0	0	Bacteria|Firmicutes|Clostridia|Clostridiales|Lachnospiraceae
581474	#N/A	#N/A	#N/A	0	-1.22474	0	43	0	0	150	2	0	159	466	3	0	0	16	2	3	1	4	0	1	197	247	6	375	59	0	281	25	21	Bacteria|Firmicutes|Bacilli|Lactobacillales|Lactobacillaceae|Lactobacillus
276769	8	0	0	#N/A	#N/A	#N/A	2	-1.42589	0	3	19	10	1	2	27	9	21	5	2	19	13	0	5	4	18	19	0	56	15	5	15	14	5	Bacteria|Firmicutes|Clostridia|Clostridiales|Lachnospiraceae
276761	12	-0.362069	0.32	11	-1.09322	0	0	1.63116	0	466	1	2	404	0	698	219	1122	56	0	1	808	4	1454	1269	649	838	1403	2489	2892	0	1	0	3	Bacteria|Firmicutes|Clostridia|Clostridiales|Ruminococcaceae
259699	#N/A	#N/A	#N/A	21	0.144338	0	#N/A	#N/A	#N/A	1	0	0	0	0	2	0	0	0	0	3	2	0	1	1	0	0	1	0	1	1	2	0	2	Bacteria|Firmicutes|Clostridia|Clostridiales|Ruminococcaceae
276941	#N/A	#N/A	#N/A	#N/A	#N/A	#N/A	#N/A	#N/A	#N/A	0	1	2	0	0	0	0	0	0	1	1	0	0	0	1	0	2	0	0	0	0	1	0	1	Bacteria|Firmicutes|Clostridia|Clostridiales|Lachnospiraceae|[Ruminococcus]|gnavus
353923	#N/A	#N/A	#N/A	#N/A	#N/A	#N/A	#N/A	#N/A	#N/A	0	2	0	0	0	0	0	0	0	3	1	0	0	1	0	1	0	0	0	1	0	0	1	0	Bacteria|Firmicutes|Clostridia|Clostridiales
579413	#N/A	#N/A	#N/A	#N/A	#N/A	#N/A	#N/A	#N/A	#N/A	0	0	1	0	0	0	0	0	0	0	0	0	0	0	0	0	0	0	0	0	0	0	0	0	Bacteria|Proteobacteria|Betaproteobacteria
160750	#N/A	#N/A	#N/A	#N/A	#N/A	#N/A	#N/A	#N/A	#N/A	0	0	0	0	0	0	0	0	0	0	0	0	0	2	0	0	0	0	0	0	0	0	0	0	Bacteria|Firmicutes|Clostridia|Clostridiales|Lachnospiraceae|Coprococcus
277143	#N/A	#N/A	#N/A	#N/A	#N/A	#N/A	9	0.668817	0	2391	1133	16	1096	1150	1451	2242	2930	995	919	221	864	590	1934	1290	4982	4974	2284	8181	510	168	1871	1191	364	Bacteria|Firmicutes|Erysipelotrichi|Erysipelotrichales|Erysipelotrichaceae|Allobaculum
182537	#N/A	#N/A	#N/A	#N/A	#N/A	#N/A	#N/A	#N/A	#N/A	0	0	1	0	0	0	0	0	0	2	0	0	1	1	0	0	0	0	0	0	0	0	0	0	Bacteria|Firmicutes|Clostridia|Clostridiales|Lachnospiraceae
589071	#N/A	#N/A	#N/A	#N/A	#N/A	#N/A	#N/A	#N/A	#N/A	0	0	0	38	1	1	0	0	0	0	0	0	0	0	0	0	0	1	0	0	0	0	0	0	Bacteria|Bacteroidetes|Bacteroidia|Bacteroidales|Bacteroidaceae|Bacteroides|uniformis
261574	#N/A	#N/A	#N/A	#N/A	#N/A	#N/A	#N/A	#N/A	#N/A	0	0	0	1	0	0	0	0	0	0	0	0	0	0	0	0	0	0	0	0	0	0	0	0	Bacteria|Firmicutes|Clostridia|Clostridiales
411486	#N/A	#N/A	#N/A	#N/A	#N/A	#N/A	#N/A	#N/A	#N/A	1	0	0	0	0	0	0	0	0	0	0	0	0	0	0	0	0	0	0	0	0	0	0	0	Bacteria|Firmicutes|Bacilli|Lactobacillales|Lactobacillaceae|Lactobacillus|reuteri
268962	#N/A	#N/A	#N/A	#N/A	#N/A	#N/A	#N/A	#N/A	#N/A	0	0	0	0	0	0	0	0	0	0	0	0	0	0	1	1	1	0	0	1	0	0	0	0	Bacteria|Firmicutes|Clostridia|Clostridiales|Ruminococcaceae
277094	#N/A	#N/A	#N/A	#N/A	#N/A	#N/A	#N/A	#N/A	#N/A	0	0	0	0	0	0	0	0	0	0	0	0	0	0	0	1	0	0	0	0	0	0	0	0	Bacteria|Proteobacteria|Gammaproteobacteria|Pseudomonadales|Pseudomonadaceae|Pseudomonas
4356641	#N/A	#N/A	#N/A	#N/A	#N/A	#N/A	#N/A	#N/A	#N/A	0	0	0	0	0	0	0	0	0	0	0	0	0	0	0	0	0	1	0	0	0	0	0	0	Bacteria|Bacteroidetes|Bacteroidia|Bacteroidales|Bacteroidaceae|Bacteroides
516115	#N/A	#N/A	#N/A	#N/A	#N/A	#N/A	#N/A	#N/A	#N/A	0	0	1	0	0	1	0	0	0	0	0	0	0	0	0	1	0	0	2	0	0	0	1	2	Bacteria|Firmicutes|Bacilli|Lactobacillales|Streptococcaceae|Lactococcus
297045	#N/A	#N/A	#N/A	#N/A	#N/A	#N/A	#N/A	#N/A	#N/A	0	0	1	0	0	0	0	0	0	0	0	0	0	0	0	0	0	0	1	0	0	0	0	0	Bacteria|Firmicutes|Clostridia|Clostridiales|Ruminococcaceae|Oscillospira
1919007	10	-0.781736	0	6	0.307794	0	4	0.243332	0	5	2	2	1	0	3	4	1	1	5	0	6	5	3	1	3	3	2	0	0	3	1	3	2	Bacteria|Bacteroidetes|Bacteroidia|Bacteroidales|Bacteroidaceae|Bacteroides
408877	#N/A	#N/A	#N/A	#N/A	#N/A	#N/A	#N/A	#N/A	#N/A	0	0	0	0	0	0	0	0	0	0	0	0	0	1	0	0	0	0	0	0	0	0	0	0	Bacteria|Firmicutes|Clostridia|Clostridiales
269401	#N/A	#N/A	#N/A	#N/A	#N/A	#N/A	22	0.420084	0	0	2	0	1	0	0	0	0	1	0	0	0	0	0	1	0	0	1	0	1	0	1	2	0	Bacteria|Firmicutes|Clostridia|Clostridiales|Ruminococcaceae|Oscillospira
186233	11	-1.06066	0	9	-0.111675	0.489796	8	0.408248	0	96	60	0	148	0	0	6	197	0	90	15	22	155	19	122	173	0	5	414	0	112	234	99	0	Bacteria|Bacteroidetes|Bacteroidia|Bacteroidales|Porphyromonadaceae|Parabacteroides|distasonis
4455163	1	-0.836622	0	#N/A	#N/A	#N/A	4	-0.378517	0.444444	4	6	12	7	4	19	11	9	74	17	0	13	14	12	6	17	10	5	1	3	9	1	12	11	Bacteria|Bacteroidetes|Bacteroidia|Bacteroidales|Bacteroidaceae|Bacteroides
204144	#N/A	#N/A	#N/A	#N/A	#N/A	#N/A	#N/A	#N/A	#N/A	0	0	0	0	0	0	0	0	0	0	0	0	0	1	0	0	0	0	0	0	0	0	0	0	Bacteria|Bacteroidetes|Bacteroidia|Bacteroidales|S24-7
457614	3	-0.974176	0	0	2.17732	0	#N/A	#N/A	#N/A	75	46	212	33	123	2	162	0	14	175	176	181	112	108	144	53	251	194	3	32	0	23	222	155	Bacteria|Firmicutes|Clostridia|Clostridiales|Lachnospiraceae
198866	6	-1.26035	0.444444	4	-1.03693	0	#N/A	#N/A	#N/A	33	66	34	140	37	51	0	15	13	13	0	24	21	23	33	37	0	36	0	0	0	0	0	46	Bacteria|Bacteroidetes|Bacteroidia|Bacteroidales|Porphyromonadaceae|Parabacteroides
261178	#N/A	#N/A	#N/A	#N/A	#N/A	#N/A	#N/A	#N/A	#N/A	0	0	0	0	0	1	0	0	0	0	0	0	0	0	0	1	0	0	0	0	0	0	0	1	Bacteria|Firmicutes|Clostridia|Clostridiales|Lachnospiraceae
193723	#N/A	#N/A	#N/A	#N/A	#N/A	#N/A	#N/A	#N/A	#N/A	0	0	0	0	0	0	0	0	0	1	0	0	0	0	0	0	0	0	0	0	0	0	0	0	Bacteria|Bacteroidetes|Bacteroidia|Bacteroidales|S24-7
566391	#N/A	#N/A	#N/A	#N/A	#N/A	#N/A	#N/A	#N/A	#N/A	0	0	0	2	0	0	0	0	0	0	0	0	0	0	0	0	0	0	0	0	0	0	0	0	Bacteria|Firmicutes|Clostridia|Clostridiales
204369	7	0.690201	0	#N/A	#N/A	#N/A	#N/A	#N/A	#N/A	3	0	3	3	4	1	2	3	1	1	0	0	2	4	0	0	12	2	5	1	1	2	1	0	Bacteria|Firmicutes|Clostridia|Clostridiales|Christensenellaceae
271325	10	-0.781736	0	7	1.875	0	6	0.159503	0	1	2	0	5	0	5	4	0	1	1	4	8	5	8	4	1	10	10	1	6	4	3	3	1	Bacteria|Bacteroidetes|Bacteroidia|Bacteroidales|S24-7
190257	#N/A	#N/A	#N/A	#N/A	#N/A	#N/A	#N/A	#N/A	#N/A	0	0	0	0	0	0	0	0	0	0	0	0	0	0	0	0	0	1	0	0	0	0	0	0	Bacteria|Bacteroidetes|Bacteroidia|Bacteroidales|S24-7
322776	#N/A	#N/A	#N/A	#N/A	#N/A	#N/A	#N/A	#N/A	#N/A	0	0	0	0	0	0	0	0	0	0	0	0	0	1	0	0	0	0	0	0	0	0	0	0	Bacteria|Firmicutes|Clostridia|Clostridiales
274204	#N/A	#N/A	#N/A	#N/A	#N/A	#N/A	#N/A	#N/A	#N/A	0	0	0	0	0	0	0	0	0	0	0	73	0	0	0	0	0	0	0	0	0	0	0	0	Bacteria|Firmicutes|Clostridia|Clostridiales
260156	#N/A	#N/A	#N/A	#N/A	#N/A	#N/A	#N/A	#N/A	#N/A	0	0	0	0	1	0	1	0	0	0	0	0	3	0	0	0	1	0	0	0	0	1	0	0	Bacteria|Firmicutes|Clostridia|Clostridiales
3600504	26	1.56893	0	#N/A	#N/A	#N/A	#N/A	#N/A	#N/A	1	1	1	0	0	1	0	0	0	1	0	0	0	1	0	1	1	2	0	0	0	0	1	0	Bacteria|Bacteroidetes|Bacteroidia|Bacteroidales|Bacteroidaceae|Bacteroides
336174	#N/A	#N/A	#N/A	#N/A	#N/A	#N/A	#N/A	#N/A	#N/A	0	0	0	0	0	0	0	0	0	0	0	0	0	0	0	0	1	0	0	0	0	0	0	0	Bacteria|Firmicutes|Clostridia|Clostridiales|Lachnospiraceae
3439403	37	0	0	6	1.64157	0	25	0	0	10	21	18	31	14	20	14	9	8	32	0	44	38	31	13	19	17	15	0	3	7	4	32	7	Bacteria|Bacteroidetes|Bacteroidia|Bacteroidales|Bacteroidaceae|Bacteroides
176760	#N/A	#N/A	#N/A	#N/A	#N/A	#N/A	#N/A	#N/A	#N/A	0	0	0	0	0	1	1	0	0	1	0	1	0	1	0	0	0	1	3	0	0	0	0	0	Bacteria|Bacteroidetes|Bacteroidia|Bacteroidales|S24-7
271811	#N/A	#N/A	#N/A	#N/A	#N/A	#N/A	#N/A	#N/A	#N/A	0	1	2	0	0	1	0	0	0	0	1	1	0	0	0	0	0	0	0	0	0	0	0	0	Bacteria|Firmicutes|Clostridia|Clostridiales
269243	#N/A	#N/A	#N/A	#N/A	#N/A	#N/A	#N/A	#N/A	#N/A	0	0	0	1	0	1	0	0	0	0	0	0	0	0	1	0	0	3	0	1	0	0	0	0	Bacteria|Firmicutes|Clostridia|Clostridiales|Ruminococcaceae|Oscillospira
269247	#N/A	#N/A	#N/A	#N/A	#N/A	#N/A	#N/A	#N/A	#N/A	0	0	0	0	0	0	0	0	0	0	0	0	0	1	0	1	6	0	3	0	0	0	0	0	Bacteria|Firmicutes|Clostridia|Clostridiales
1503693	#N/A	#N/A	#N/A	#N/A	#N/A	#N/A	#N/A	#N/A	#N/A	0	0	0	2	1	0	1	0	0	0	0	0	0	0	0	0	0	0	0	0	0	0	0	0	Bacteria|Firmicutes|Clostridia|Clostridiales|Clostridiaceae
3013444	6	-0.58621	0	9	3.73683	0.393491	#N/A	#N/A	#N/A	19520	12990	31464	31939	11971	26033	11691	12423	401	6589	13952	26871	19326	14697	14379	14979	7287	47701	27840	31802	12507	12700	15408	6087	Bacteria|Bacteroidetes|Bacteroidia|Bacteroidales
199716	#N/A	#N/A	#N/A	0	-0.544331	0	#N/A	#N/A	#N/A	0	0	0	0	0	1	0	0	1	0	0	0	1	1	0	3	1	1	2	0	0	3	1	0	Bacteria|Bacteroidetes|Bacteroidia|Bacteroidales|Bacteroidaceae|Bacteroides
589658	#N/A	#N/A	#N/A	#N/A	#N/A	#N/A	#N/A	#N/A	#N/A	0	0	0	0	0	0	0	0	0	0	1	0	0	0	0	0	0	0	0	0	0	0	0	0	Bacteria|Firmicutes|Clostridia|Clostridiales
532232	#N/A	#N/A	#N/A	29	0	0	10	1.57989	0.21875	1	0	0	0	0	0	0	0	0	1	0	1	0	1	0	1	1	1	7	0	0	0	1	0	Bacteria|Firmicutes|Bacilli|Lactobacillales|Streptococcaceae|Streptococcus
274335	#N/A	#N/A	#N/A	#N/A	#N/A	#N/A	#N/A	#N/A	#N/A	0	0	0	0	0	0	0	0	0	0	0	0	0	0	0	0	0	0	2	0	0	0	0	0	Bacteria|Firmicutes|Clostridia|Clostridiales|Ruminococcaceae|Oscillospira
298346	#N/A	#N/A	#N/A	#N/A	#N/A	#N/A	#N/A	#N/A	#N/A	0	0	0	0	0	0	0	0	0	0	0	0	0	0	0	0	1	0	0	0	0	0	0	1	Bacteria|Firmicutes|Clostridia|Clostridiales|Ruminococcaceae
196962	#N/A	#N/A	#N/A	#N/A	#N/A	#N/A	#N/A	#N/A	#N/A	0	0	0	0	0	0	0	0	0	0	0	0	0	0	7	0	0	0	0	0	0	0	0	0	Bacteria|Firmicutes|Clostridia|Clostridiales
210908	#N/A	#N/A	#N/A	23	-0.267261	0	#N/A	#N/A	#N/A	0	0	0	0	1	0	0	0	0	1	0	1	1	1	0	0	0	0	0	1	0	2	0	1	Bacteria|Bacteroidetes|Bacteroidia|Bacteroidales|S24-7
275132	#N/A	#N/A	#N/A	#N/A	#N/A	#N/A	#N/A	#N/A	#N/A	0	0	0	0	0	0	0	0	0	0	0	0	0	0	0	0	0	1	2	0	0	0	0	0	Bacteria|Firmicutes|Clostridia|Clostridiales|Lachnospiraceae
346098	#N/A	#N/A	#N/A	#N/A	#N/A	#N/A	#N/A	#N/A	#N/A	0	0	0	0	0	0	0	0	0	0	0	0	0	0	0	0	0	0	0	0	0	0	1	0	Bacteria|Firmicutes|Clostridia|Clostridiales|Lachnospiraceae
271494	#N/A	#N/A	#N/A	#N/A	#N/A	#N/A	#N/A	#N/A	#N/A	0	0	0	0	0	0	0	0	0	0	0	0	0	0	0	0	0	0	0	0	2	0	1	0	Bacteria|Firmicutes|Clostridia|Clostridiales
992510	#N/A	#N/A	#N/A	#N/A	#N/A	#N/A	#N/A	#N/A	#N/A	0	0	0	0	0	0	0	0	0	0	0	0	0	1	0	0	0	0	0	0	0	0	0	0	Bacteria|Proteobacteria|Alphaproteobacteria|Sphingomonadales|Sphingomonadaceae|Sphingomonas
938948	#N/A	#N/A	#N/A	#N/A	#N/A	#N/A	#N/A	#N/A	#N/A	0	0	0	0	0	0	0	0	0	0	0	0	0	0	0	0	0	0	0	0	0	0	1	0	Bacteria|Fusobacteria|Fusobacteriia|Fusobacteriales|Fusobacteriaceae|Fusobacterium
4463892	#N/A	#N/A	#N/A	#N/A	#N/A	#N/A	#N/A	#N/A	#N/A	0	0	0	1	0	0	1	0	0	2	0	1	1	3	1	2	1	0	0	0	0	0	0	0	Bacteria|Bacteroidetes|Bacteroidia|Bacteroidales|Bacteroidaceae|Bacteroides
4056429	#N/A	#N/A	#N/A	#N/A	#N/A	#N/A	#N/A	#N/A	#N/A	0	0	0	0	0	0	0	0	0	0	1	0	0	0	0	0	0	0	0	0	0	0	0	0	Bacteria|Firmicutes|Clostridia|Clostridiales|Ruminococcaceae
190676	#N/A	#N/A	#N/A	#N/A	#N/A	#N/A	#N/A	#N/A	#N/A	0	0	0	0	0	0	0	0	0	0	1	0	0	0	0	0	0	0	0	0	0	0	0	0	Bacteria|Firmicutes|Clostridia|Clostridiales|Ruminococcaceae|Oscillospira
268596	#N/A	#N/A	#N/A	#N/A	#N/A	#N/A	#N/A	#N/A	#N/A	0	0	0	0	0	1	0	0	0	0	1	0	0	0	0	0	2	2	0	0	0	0	0	1	Bacteria|Firmicutes|Clostridia|Clostridiales|Ruminococcaceae|Oscillospira
367215	#N/A	#N/A	#N/A	#N/A	#N/A	#N/A	#N/A	#N/A	#N/A	0	0	0	0	0	0	26	0	0	0	0	0	0	0	0	0	0	0	0	0	0	0	0	0	Bacteria|Firmicutes|Erysipelotrichi|Erysipelotrichales|Erysipelotrichaceae|Holdemania
827592	#N/A	#N/A	#N/A	#N/A	#N/A	#N/A	#N/A	#N/A	#N/A	0	0	0	0	0	0	0	0	0	0	0	0	0	1	1	0	0	0	0	1	0	0	0	0	Bacteria|Firmicutes|Clostridia|Clostridiales|Ruminococcaceae|Ruminococcus
1109297	#N/A	#N/A	#N/A	#N/A	#N/A	#N/A	#N/A	#N/A	#N/A	0	1	0	0	0	0	0	0	0	0	0	0	0	0	0	0	0	1	0	1	0	0	0	0	Bacteria|Firmicutes|Clostridia|Clostridiales|Lachnospiraceae|Dorea
4462436	#N/A	#N/A	#N/A	#N/A	#N/A	#N/A	18	-1.02062	0	2	3	4	7	2	2	2	4	1	3	0	10	10	5	1	4	5	3	0	1	0	0	7	0	Bacteria|Bacteroidetes|Bacteroidia|Bacteroidales|Bacteroidaceae|Bacteroides
2061739	#N/A	#N/A	#N/A	#N/A	#N/A	#N/A	#N/A	#N/A	#N/A	0	0	0	0	0	0	0	0	0	0	0	0	0	1	0	0	0	0	0	1	1	0	0	0	Bacteria|Bacteroidetes|Bacteroidia|Bacteroidales|Bacteroidaceae|Bacteroides
198449	2	0.0976565	0	#N/A	#N/A	#N/A	#N/A	#N/A	#N/A	0	1	0	1	0	1	0	1	0	1	0	0	0	0	0	1	0	0	0	0	0	0	0	0	Bacteria|Bacteroidetes|Bacteroidia|Bacteroidales|Bacteroidaceae|Bacteroides
190380	22	0.846228	0	43	0	0	#N/A	#N/A	#N/A	0	0	1	1	1	1	0	0	1	2	1	1	0	2	0	0	0	1	0	0	1	1	0	0	Bacteria|Firmicutes|Clostridia|Clostridiales|Ruminococcaceae|Oscillospira
194269	#N/A	#N/A	#N/A	#N/A	#N/A	#N/A	#N/A	#N/A	#N/A	0	0	0	0	1	0	0	0	1	0	0	0	0	0	1	0	0	1	0	0	0	0	1	0	Bacteria|Firmicutes|Clostridia|Clostridiales|Ruminococcaceae
275627	53	0	0	#N/A	#N/A	#N/A	9	0.0891756	0.375	2	1	0	0	1	0	2	2	0	0	0	0	0	0	0	1	2	1	5	0	0	1	0	0	Bacteria|Firmicutes|Erysipelotrichi|Erysipelotrichales|Erysipelotrichaceae|Allobaculum
275557	7	-0.250982	0	3	-0.475971	0	13	-0.125988	0	19	13	24	9	14	11	29	35	4	25	2	18	17	0	0	29	16	15	3	36	9	20	11	14	Bacteria|Firmicutes|Clostridia|Clostridiales
278758	#N/A	#N/A	#N/A	#N/A	#N/A	#N/A	#N/A	#N/A	#N/A	0	0	0	0	0	0	0	0	0	0	0	0	0	0	0	0	0	0	0	0	0	0	1	0	Bacteria|Firmicutes|Clostridia|Clostridiales|Ruminococcaceae|Oscillospira
295370	#N/A	#N/A	#N/A	#N/A	#N/A	#N/A	7	0.508001	0	0	0	0	0	0	0	1	2	0	1	0	0	1	0	0	0	1	0	1	1	0	2	3	0	Bacteria|Firmicutes|Clostridia|Clostridiales|Lachnospiraceae|[Ruminococcus]|gnavus
316378	#N/A	#N/A	#N/A	#N/A	#N/A	#N/A	#N/A	#N/A	#N/A	0	0	0	0	0	0	0	0	0	0	0	0	0	0	0	0	1	0	0	0	0	0	0	0	Bacteria|Firmicutes|Clostridia|Clostridiales|Clostridiaceae
264014	19	1.75	0	13	-1.02062	0	3	-0.214886	0	15	4	3	3	15	4	7	14	0	0	10	0	5	52	1	6	0	2	5	5	5	1	0	2	Bacteria|Firmicutes|Clostridia|Clostridiales
525344	#N/A	#N/A	#N/A	6	-1.02598	0	17	0.42135	0.375	1	2	5	11	1	0	6	4	0	4	0	1	6	1	8	1	1	8	7	8	3	9	5	1	Bacteria|Bacteroidetes|Bacteroidia|Bacteroidales|[Odoribacteraceae]|Butyricimonas
1110378	1	0.195805	0	9	-0.111675	0	11	-1.16667	0	0	25	13	5	19	15	6	22	0	4	20	3	10	4	18	6	14	15	44	19	9	16	12	7	Bacteria|Firmicutes|Clostridia|Clostridiales|Ruminococcaceae|Oscillospira
263618	12	1.21787	0.165289	29	0	0	4	0.243332	0	30	19	21	20	15	30	37	20	4	53	0	33	20	35	40	21	65	34	100	1	27	11	36	12	Bacteria|Bacteroidetes|Bacteroidia|Bacteroidales|S24-7
343140	#N/A	#N/A	#N/A	#N/A	#N/A	#N/A	#N/A	#N/A	#N/A	0	0	0	0	0	0	0	0	0	0	1	0	0	0	0	0	0	0	1	0	0	0	0	0	Bacteria|Firmicutes|Clostridia|Clostridiales|Ruminococcaceae
4390754	#N/A	#N/A	#N/A	#N/A	#N/A	#N/A	#N/A	#N/A	#N/A	0	0	0	0	0	0	0	0	0	0	0	0	0	0	0	0	1	0	0	0	0	0	0	0	Bacteria|Firmicutes|Clostridia|Clostridiales|Lachnospiraceae|[Ruminococcus]|gnavus
268112	#N/A	#N/A	#N/A	#N/A	#N/A	#N/A	#N/A	#N/A	#N/A	0	0	0	0	0	0	0	0	0	0	1	0	0	1	0	0	0	0	0	1	0	0	0	0	Bacteria|Firmicutes|Clostridia|Clostridiales
192832	#N/A	#N/A	#N/A	#N/A	#N/A	#N/A	#N/A	#N/A	#N/A	0	0	0	0	0	1	0	0	0	0	0	0	0	0	0	0	0	0	0	0	0	0	0	0	Bacteria|Firmicutes|Bacilli|Lactobacillales|Lactobacillaceae|Lactobacillus
276091	#N/A	#N/A	#N/A	#N/A	#N/A	#N/A	#N/A	#N/A	#N/A	0	0	0	0	0	0	0	0	0	0	0	0	0	1	0	0	0	0	0	0	0	0	0	0	Bacteria|Firmicutes|Clostridia|Clostridiales|Lachnospiraceae
1108453	#N/A	#N/A	#N/A	#N/A	#N/A	#N/A	#N/A	#N/A	#N/A	0	0	0	0	1	0	0	3	0	0	0	0	0	0	0	0	2	0	0	0	0	1	0	0	Bacteria|Firmicutes|Clostridia|Clostridiales
263120	#N/A	#N/A	#N/A	#N/A	#N/A	#N/A	#N/A	#N/A	#N/A	0	0	0	1	1	1	1	1	0	2	0	3	3	0	0	0	0	0	0	0	0	2	0	0	Bacteria|Bacteroidetes|Bacteroidia|Bacteroidales|S24-7
318763	#N/A	#N/A	#N/A	#N/A	#N/A	#N/A	#N/A	#N/A	#N/A	0	0	0	0	1	0	0	0	0	0	0	0	0	0	0	0	0	0	0	0	0	0	1	0	Bacteria|Firmicutes|Bacilli|Lactobacillales|Streptococcaceae|Lactococcus
192839	#N/A	#N/A	#N/A	#N/A	#N/A	#N/A	#N/A	#N/A	#N/A	0	0	0	0	0	1	1	0	0	0	1	0	0	0	1	0	0	1	1	0	0	0	0	0	Bacteria|Bacteroidetes|Bacteroidia|Bacteroidales|Bacteroidaceae|Bacteroides
351292	9	1.83316	0	42	0	0	0	-1.04034	0	20	142	4	451	398	74	1029	99	18	13	80	33	304	148	23	205	31	303	899	216	100	90	10	48	Bacteria|Bacteroidetes|Bacteroidia|Bacteroidales|Bacteroidaceae|Bacteroides
271672	2	0.0976565	0	#N/A	#N/A	#N/A	#N/A	#N/A	#N/A	0	1	0	1	0	1	0	2	1	0	4	0	0	0	0	0	1	1	2	0	2	0	0	1	Bacteria|Firmicutes|Clostridia|Clostridiales|Ruminococcaceae|Oscillospira
315880	#N/A	#N/A	#N/A	#N/A	#N/A	#N/A	2	0.609117	0.444444	0	0	0	246	0	1	0	0	0	0	0	1	0	3	0	1	2	0	2	4	1	0	0	0	Bacteria|Firmicutes|Clostridia|Clostridiales|Lachnospiraceae
272788	#N/A	#N/A	#N/A	#N/A	#N/A	#N/A	#N/A	#N/A	#N/A	0	0	0	0	0	0	0	0	0	0	0	0	0	1	0	0	0	0	0	0	0	0	0	0	Bacteria|Firmicutes|Clostridia|Clostridiales|Ruminococcaceae
271476	#N/A	#N/A	#N/A	#N/A	#N/A	#N/A	#N/A	#N/A	#N/A	0	0	0	0	0	1	0	0	0	0	0	1	0	0	0	0	0	0	0	0	0	0	0	0	Bacteria|Firmicutes|Clostridia|Clostridiales|Lachnospiraceae|[Ruminococcus]|gnavus
187790	#N/A	#N/A	#N/A	11	1.24939	0	6	0.159503	0.375	0	0	5	1	0	0	1	0	1	4	3	2	3	0	0	0	0	0	0	3	7	2	1	0	Bacteria|Firmicutes|Clostridia|Clostridiales|Ruminococcaceae
174056	#N/A	#N/A	#N/A	#N/A	#N/A	#N/A	12	0.636146	0.32	2	0	0	0	3	0	0	0	0	0	0	0	0	0	2	1	1	1	3	0	1	0	0	0	Bacteria|Bacteroidetes|Bacteroidia|Bacteroidales|S24-7
196533	#N/A	#N/A	#N/A	#N/A	#N/A	#N/A	#N/A	#N/A	#N/A	0	0	0	0	0	0	0	0	0	0	0	1	0	0	0	0	1	0	0	0	0	0	0	0	Bacteria|Firmicutes|Clostridia|Clostridiales|Lachnospiraceae
272787	#N/A	#N/A	#N/A	#N/A	#N/A	#N/A	#N/A	#N/A	#N/A	0	0	0	0	0	0	0	0	0	0	0	0	0	0	0	0	0	0	0	0	1	4	0	0	Bacteria|Firmicutes|Clostridia|Clostridiales
245625	#N/A	#N/A	#N/A	#N/A	#N/A	#N/A	#N/A	#N/A	#N/A	0	1	0	0	0	0	0	0	0	0	2	0	0	0	0	0	0	0	0	0	0	0	0	0	Bacteria|Firmicutes|Clostridia|Clostridiales|Clostridiaceae|Clostridium
288109	13	-1.73205	0	#N/A	#N/A	#N/A	#N/A	#N/A	#N/A	1	3	1	0	2	0	0	3	2	2	0	1	0	0	1	2	8	1	0	3	1	2	2	0	Bacteria|Firmicutes|Clostridia|Clostridiales|Dehalobacteriaceae|Dehalobacterium
289984	#N/A	#N/A	#N/A	#N/A	#N/A	#N/A	5	0.0723954	0	0	1	0	0	0	0	0	0	0	0	0	0	0	0	0	0	0	0	2	2	0	1	0	2	Bacteria|Firmicutes|Clostridia|Clostridiales|Lachnospiraceae
263057	#N/A	#N/A	#N/A	#N/A	#N/A	#N/A	#N/A	#N/A	#N/A	0	0	0	0	0	0	0	0	0	0	0	1	0	1	0	0	0	0	0	0	0	0	0	0	Bacteria|Bacteroidetes|Bacteroidia|Bacteroidales|S24-7
399637	#N/A	#N/A	#N/A	#N/A	#N/A	#N/A	#N/A	#N/A	#N/A	0	0	1	0	0	0	0	0	0	0	0	0	0	0	0	0	0	0	0	0	0	0	0	0	Bacteria|Firmicutes|Clostridia|Clostridiales
263546	#N/A	#N/A	#N/A	2	0.48795	0	0	-1.04034	0.444444	0	0	0	148	0	0	0	0	3	0	0	98	0	0	2	1	558	1	848	24	0	0	2	0	Bacteria|Firmicutes|Clostridia|Clostridiales|Ruminococcaceae|Oscillospira
258421	#N/A	#N/A	#N/A	5	-0.410391	0	#N/A	#N/A	#N/A	2	1	0	0	1	0	0	0	0	0	0	1	1	2	0	3	0	4	2	0	0	0	1	0	Bacteria|Firmicutes|Erysipelotrichi|Erysipelotrichales|Erysipelotrichaceae|Allobaculum
434089	19	-0.75	0	#N/A	#N/A	#N/A	#N/A	#N/A	#N/A	5	3	1	1	16	2	3	11	0	0	0	3	0	1	1	0	0	3	1	7	3	9	0	1	Bacteria|Firmicutes|Clostridia|Clostridiales|Ruminococcaceae
337511	#N/A	#N/A	#N/A	#N/A	#N/A	#N/A	#N/A	#N/A	#N/A	0	0	0	0	0	39	0	0	0	0	0	0	0	0	1	0	0	0	0	0	0	0	0	0	Bacteria|Firmicutes|Clostridia|Clostridiales|Clostridiaceae
259910	#N/A	#N/A	#N/A	#N/A	#N/A	#N/A	#N/A	#N/A	#N/A	0	0	0	0	1	0	0	0	0	0	0	0	0	0	0	0	0	0	0	0	0	0	0	0	Bacteria|Firmicutes|Clostridia|Clostridiales
217100	1	2.77687	0.34	5	0.820783	0	2	1.28745	0	20	28	25	37	36	19	29	19	9	41	35	79	42	54	20	13	23	20	46	111	22	25	19	28	Bacteria|Bacteroidetes|Bacteroidia|Bacteroidales|S24-7
259912	1	0.195805	0	11	0.468521	0	2	-0.747553	0	0	4	6	0	1	1	1	1	1	6	3	2	2	0	0	0	0	1	4	0	1	3	3	2	Bacteria|Firmicutes|Clostridia|Clostridiales|Lachnospiraceae
1051517	#N/A	#N/A	#N/A	#N/A	#N/A	#N/A	#N/A	#N/A	#N/A	0	0	0	0	0	1	0	0	0	0	0	0	0	0	0	0	0	0	0	0	0	0	0	0	Bacteria|Firmicutes|Bacilli|Bacillales|Bacillaceae|Bacillus
234298	#N/A	#N/A	#N/A	#N/A	#N/A	#N/A	#N/A	#N/A	#N/A	0	0	0	0	0	0	0	0	0	0	1	0	0	1	0	0	0	0	0	0	0	0	1	0	Bacteria|Verrucomicrobia|Verrucomicrobiae|Verrucomicrobiales|Verrucomicrobiaceae|Akkermansia|muciniphila
441468	#N/A	#N/A	#N/A	#N/A	#N/A	#N/A	#N/A	#N/A	#N/A	0	0	1	0	0	0	4	0	0	0	0	0	0	1	0	0	0	0	0	2	2	0	2	0	Bacteria|Firmicutes|Clostridia|Clostridiales
1809696	2	1.18583	0	8	-0.210105	0	#N/A	#N/A	#N/A	1	0	1	1	0	0	3	0	0	0	0	2	1	1	2	2	0	0	0	0	0	0	0	1	Bacteria|Bacteroidetes|Bacteroidia|Bacteroidales|Bacteroidaceae|Bacteroides
173245	#N/A	#N/A	#N/A	#N/A	#N/A	#N/A	#N/A	#N/A	#N/A	0	0	0	0	0	0	0	0	0	0	0	2	0	0	0	0	0	0	0	0	0	0	0	0	Bacteria|Firmicutes|Clostridia|Clostridiales
1110766	#N/A	#N/A	#N/A	9	-0.592739	0	#N/A	#N/A	#N/A	1	2	0	1	2	1	0	0	0	0	4	3	2	2	0	0	0	0	0	0	0	0	0	0	Bacteria|Firmicutes|Clostridia|Clostridiales|Lachnospiraceae
272092	#N/A	#N/A	#N/A	5	0.205196	0	0	-1.04034	0	9	12	11	4	6	2	4	8	0	28	2	12	10	1	0	1	1	6	2	3	0	3	2	1	Bacteria|Firmicutes|Clostridia|Clostridiales
1009894	#N/A	#N/A	#N/A	#N/A	#N/A	#N/A	#N/A	#N/A	#N/A	0	0	0	0	0	1	0	0	0	0	0	0	0	0	0	0	0	0	0	0	0	0	5	0	Bacteria|Proteobacteria|Gammaproteobacteria|Pseudomonadales|Moraxellaceae|Acinetobacter
344256	33	0	0	41	0	0	9	-1.07011	0	103	12	109	25	13	69	2	367	2	71	7	91	4	44	46	71	40	178	224	1	0	3	4	7	Bacteria|Firmicutes|Clostridia|Clostridiales
38278	#N/A	#N/A	#N/A	#N/A	#N/A	#N/A	#N/A	#N/A	#N/A	0	0	0	0	0	0	0	0	0	1	0	1	0	0	0	0	0	0	0	0	0	0	0	0	Bacteria|Bacteroidetes|Bacteroidia|Bacteroidales|S24-7
267175	#N/A	#N/A	#N/A	#N/A	#N/A	#N/A	#N/A	#N/A	#N/A	0	0	0	0	0	0	0	0	0	0	0	0	0	0	0	0	0	0	0	0	0	0	1	0	Bacteria|Firmicutes|Clostridia|Clostridiales|Lachnospiraceae
178799	#N/A	#N/A	#N/A	#N/A	#N/A	#N/A	#N/A	#N/A	#N/A	0	0	0	0	0	0	0	0	0	0	0	0	0	0	0	0	1	0	0	0	0	0	0	0	Bacteria|Firmicutes|Clostridia|Clostridiales|Ruminococcaceae
338644	#N/A	#N/A	#N/A	9	-0.111675	0	9	-0.490466	0.48	76	49	29	25	15	17	18	12	0	184	77	78	138	66	11	14	118	46	211	15	6	19	51	11	Bacteria|Actinobacteria|Coriobacteriia|Coriobacteriales|Coriobacteriaceae|Adlercreutzia
267914	#N/A	#N/A	#N/A	#N/A	#N/A	#N/A	#N/A	#N/A	#N/A	0	0	0	0	0	0	2	1	0	0	0	0	0	0	0	1	0	2	0	0	0	1	0	2	Bacteria|Firmicutes|Clostridia|Clostridiales
180671	#N/A	#N/A	#N/A	#N/A	#N/A	#N/A	#N/A	#N/A	#N/A	1	0	0	0	0	0	0	0	0	0	0	1	0	0	0	0	0	0	0	0	0	0	0	0	Bacteria|Firmicutes|Clostridia|Clostridiales
262527	#N/A	#N/A	#N/A	#N/A	#N/A	#N/A	#N/A	#N/A	#N/A	0	0	0	0	0	0	0	0	0	0	0	0	0	0	1	0	0	0	0	0	0	0	0	0	Bacteria|Firmicutes|Clostridia|Clostridiales
180092	1	-0.836622	0	#N/A	#N/A	#N/A	14	-0.0985329	0	0	0	0	1	0	1	2	2	5	1	1	0	0	0	2	5	4	0	1	4	0	0	1	2	Bacteria|Bacteroidetes|Bacteroidia|Bacteroidales|S24-7
214031	#N/A	#N/A	#N/A	#N/A	#N/A	#N/A	#N/A	#N/A	#N/A	37	0	21	0	0	0	0	0	0	0	0	87	0	30	147	0	0	0	0	0	0	0	0	38	Bacteria|Bacteroidetes|Bacteroidia|Bacteroidales|Rikenellaceae
180099	#N/A	#N/A	#N/A	#N/A	#N/A	#N/A	#N/A	#N/A	#N/A	0	0	0	0	0	1	0	0	0	0	0	0	0	0	0	0	0	0	0	0	0	0	0	0	Bacteria|Firmicutes|Clostridia|Clostridiales|Lachnospiraceae
381666	#N/A	#N/A	#N/A	#N/A	#N/A	#N/A	#N/A	#N/A	#N/A	1	0	0	0	0	0	0	0	0	0	0	0	0	56	0	11	0	0	9	0	2	0	0	1	Bacteria|Cyanobacteria|4C0d-2|YS2
253061	#N/A	#N/A	#N/A	#N/A	#N/A	#N/A	#N/A	#N/A	#N/A	0	1	0	0	0	0	0	0	0	0	0	0	0	0	0	0	0	0	0	0	0	0	0	0	Bacteria|Proteobacteria|Gammaproteobacteria|Enterobacteriales|Enterobacteriaceae
193463	#N/A	#N/A	#N/A	#N/A	#N/A	#N/A	12	-1.0988	0	1	0	0	0	0	1	0	0	0	3	2	0	0	0	0	0	0	1	0	2	0	2	1	1	Bacteria|Firmicutes|Clostridia|Clostridiales
326662	#N/A	#N/A	#N/A	#N/A	#N/A	#N/A	14	-0.0985329	0	0	0	0	0	0	1	0	0	0	1	0	0	1	2	0	0	2	0	1	7	0	0	2	1	Bacteria|Bacteroidetes|Bacteroidia|Bacteroidales|Bacteroidaceae|Bacteroides
269815	#N/A	#N/A	#N/A	#N/A	#N/A	#N/A	#N/A	#N/A	#N/A	0	0	0	0	0	0	0	0	0	0	0	0	1	0	0	0	0	0	0	0	0	0	0	0	Bacteria|Firmicutes|Clostridia|Clostridiales
306699	#N/A	#N/A	#N/A	#N/A	#N/A	#N/A	#N/A	#N/A	#N/A	0	0	0	0	0	0	0	0	0	0	0	0	0	1	0	0	0	0	0	2	1	0	0	0	Bacteria|Firmicutes|Clostridia|Clostridiales|Ruminococcaceae|Oscillospira
276172	2	0.0976565	0	10	0	0	23	-1	0	1997	237	295	7447	13627	12491	6	4908	495	5807	372	6415	5480	6551	6032	9098	2685	17136	12390	14953	4816	10102	6597	5132	Bacteria|Bacteroidetes|Bacteroidia|Bacteroidales|Rikenellaceae
3393191	#N/A	#N/A	#N/A	#N/A	#N/A	#N/A	#N/A	#N/A	#N/A	0	2	0	0	1	0	0	0	0	0	1	0	0	0	0	0	0	0	0	0	0	0	0	0	Bacteria|Firmicutes|Clostridia|Clostridiales|Lachnospiraceae|Roseburia
272328	#N/A	#N/A	#N/A	10	1.87083	0	11	1.66667	0	0	28	0	16	0	0	1	0	0	34	17	0	8	0	1	3	0	0	18	0	5	0	23	13	Bacteria|Firmicutes|Clostridia|Clostridiales
297390	#N/A	#N/A	#N/A	#N/A	#N/A	#N/A	#N/A	#N/A	#N/A	0	0	0	0	0	1	1	0	0	1	0	1	0	0	1	0	1	0	1	0	0	0	0	0	Bacteria|Firmicutes|Clostridia|Clostridiales|Peptostreptococcaceae
273232	#N/A	#N/A	#N/A	#N/A	#N/A	#N/A	#N/A	#N/A	#N/A	0	21	0	0	0	0	0	0	0	0	17	0	0	13	0	0	0	0	1	0	0	9	12	0	Bacteria|Verrucomicrobia|Verrucomicrobiae|Verrucomicrobiales|Verrucomicrobiaceae|Akkermansia|muciniphila
320844	#N/A	#N/A	#N/A	42	0	0	2	-1.42589	0	0	0	0	3	0	1	0	0	6	4	16	2	3	0	2	1	7	1	3	2	3	0	8	0	Bacteria|Firmicutes|Clostridia|Clostridiales|Lachnospiraceae|[Ruminococcus]|gnavus
266976	#N/A	#N/A	#N/A	#N/A	#N/A	#N/A	#N/A	#N/A	#N/A	0	0	0	1	0	0	2	0	0	0	0	0	0	0	0	2	0	0	2	0	0	1	0	0	Bacteria|Bacteroidetes|Bacteroidia|Bacteroidales|S24-7
127549	#N/A	#N/A	#N/A	#N/A	#N/A	#N/A	#N/A	#N/A	#N/A	0	0	0	0	0	0	0	0	0	0	1	0	0	0	0	0	0	0	0	0	0	0	0	0	Bacteria|Proteobacteria|Betaproteobacteria|Burkholderiales|Oxalobacteraceae
4301298	#N/A	#N/A	#N/A	#N/A	#N/A	#N/A	#N/A	#N/A	#N/A	0	1	0	0	0	0	0	0	0	0	0	0	0	0	1	0	0	0	1	1	0	1	0	0	Bacteria|Bacteroidetes|Bacteroidia|Bacteroidales|Bacteroidaceae|Bacteroides
183675	#N/A	#N/A	#N/A	#N/A	#N/A	#N/A	#N/A	#N/A	#N/A	0	0	0	0	0	0	0	0	0	0	0	0	0	0	0	0	0	0	0	0	0	0	0	1	Bacteria|Firmicutes|Clostridia|Clostridiales|Ruminococcaceae|Oscillospira
2496531	#N/A	#N/A	#N/A	#N/A	#N/A	#N/A	#N/A	#N/A	#N/A	0	2	0	0	0	0	0	0	0	0	0	0	0	0	0	0	0	0	0	0	0	0	0	0	Bacteria|Firmicutes|Clostridia|Clostridiales|Clostridiaceae
170405	#N/A	#N/A	#N/A	#N/A	#N/A	#N/A	#N/A	#N/A	#N/A	0	0	0	0	0	0	0	0	0	0	0	0	0	0	0	0	1	0	0	0	0	0	0	0	Bacteria|Proteobacteria|Gammaproteobacteria|Pseudomonadales|Pseudomonadaceae|Pseudomonas
266405	#N/A	#N/A	#N/A	#N/A	#N/A	#N/A	#N/A	#N/A	#N/A	0	4	0	0	0	0	0	0	0	0	0	0	0	0	0	0	0	0	0	0	0	0	0	0	Bacteria|Firmicutes|Clostridia|Clostridiales|Lachnospiraceae
3667183	#N/A	#N/A	#N/A	#N/A	#N/A	#N/A	#N/A	#N/A	#N/A	0	0	1	0	0	0	0	0	0	0	0	2	1	2	0	0	0	0	0	0	0	0	1	0	Bacteria|Bacteroidetes|Bacteroidia|Bacteroidales|Bacteroidaceae|Bacteroides
276312	#N/A	#N/A	#N/A	#N/A	#N/A	#N/A	#N/A	#N/A	#N/A	2	0	0	0	3	0	0	0	0	0	0	0	0	0	0	0	2	0	0	0	0	0	0	0	Bacteria|Firmicutes|Clostridia|Clostridiales
183927	2	0.641742	0.32	#N/A	#N/A	#N/A	#N/A	#N/A	#N/A	1	0	3	0	1	0	1	0	0	0	0	2	0	0	0	0	0	0	0	0	1	0	1	0	Bacteria|Firmicutes|Clostridia|Clostridiales|Lachnospiraceae
181234	#N/A	#N/A	#N/A	#N/A	#N/A	#N/A	#N/A	#N/A	#N/A	0	0	0	0	0	0	0	0	0	0	0	0	0	0	0	0	1	0	0	0	0	0	0	0	Bacteria|Firmicutes|Clostridia|Clostridiales|Ruminococcaceae
181237	#N/A	#N/A	#N/A	#N/A	#N/A	#N/A	#N/A	#N/A	#N/A	0	0	0	0	0	0	0	0	0	0	1	0	0	0	0	0	0	0	0	0	0	0	0	0	Bacteria|Firmicutes|Clostridia|Clostridiales|Lachnospiraceae|[Ruminococcus]|gnavus
262416	#N/A	#N/A	#N/A	#N/A	#N/A	#N/A	#N/A	#N/A	#N/A	0	0	0	0	0	0	11	0	0	5	0	0	0	0	0	0	0	0	0	11	7	0	0	6	Bacteria|Firmicutes|Clostridia|Clostridiales
712677	7	-0.250982	0	11	-0.312348	0	24	-1.78885	0	0	7	0	3	2	1	0	0	0	4	1	3	7	0	0	0	5	4	0	4	1	0	1	0	Bacteria|Firmicutes|Clostridia|Clostridiales|Clostridiaceae|SMB53
192025	#N/A	#N/A	#N/A	#N/A	#N/A	#N/A	#N/A	#N/A	#N/A	0	0	0	0	0	0	0	0	0	2	0	0	0	0	0	0	0	0	0	0	0	0	0	0	Bacteria|Firmicutes|Clostridia|Clostridiales|Lachnospiraceae|Blautia|producta
227967	0	-0.867106	0	4	-1.03693	0	#N/A	#N/A	#N/A	5	226	85	72	15	4	352	19	1	10	16	8	35	2	14	14	2	12	8	46	17	5	2	8	Bacteria|Firmicutes|Clostridia|Clostridiales
278901	17	0	0	#N/A	#N/A	#N/A	1	-1.00626	0	1	4	2	0	3	2	3	4	1	9	2	3	0	3	2	2	10	3	2	12	3	4	5	0	Bacteria|Firmicutes|Clostridia|Clostridiales|Ruminococcaceae
4174963	#N/A	#N/A	#N/A	#N/A	#N/A	#N/A	#N/A	#N/A	#N/A	0	0	0	0	0	0	0	0	0	1	0	0	1	1	0	0	0	0	0	0	0	0	0	0	Bacteria|Bacteroidetes|Bacteroidia|Bacteroidales|Bacteroidaceae|Bacteroides
262095	26	0.588348	0	#N/A	#N/A	#N/A	29	0	0	0	3	0	416	153	0	696	489	0	284	0	0	0	0	0	117	0	1	0	56	188	252	646	7	Bacteria|Firmicutes|Erysipelotrichi|Erysipelotrichales|Erysipelotrichaceae
276404	#N/A	#N/A	#N/A	#N/A	#N/A	#N/A	#N/A	#N/A	#N/A	0	0	0	0	0	0	0	0	0	0	0	0	0	1	1	0	0	0	0	0	0	0	0	0	Bacteria|Firmicutes|Clostridia|Clostridiales|Ruminococcaceae|Oscillospira
247715	0	0.278128	0	9	-0.352207	0	17	1.20386	0	3	1	1	5	7	4	4	4	0	7	5	5	7	3	4	7	2	4	8	8	5	2	2	3	Bacteria|Bacteroidetes|Bacteroidia|Bacteroidales|S24-7
328137	#N/A	#N/A	#N/A	#N/A	#N/A	#N/A	#N/A	#N/A	#N/A	0	0	0	0	0	0	0	0	0	0	0	0	0	0	0	0	0	0	0	0	0	0	0	1	Bacteria|Firmicutes|Clostridia|Clostridiales
276402	#N/A	#N/A	#N/A	#N/A	#N/A	#N/A	#N/A	#N/A	#N/A	0	0	1	0	0	0	0	0	0	0	0	0	0	0	0	0	0	0	0	0	0	0	0	0	Bacteria|Firmicutes|Clostridia|Clostridiales
277130	#N/A	#N/A	#N/A	#N/A	#N/A	#N/A	#N/A	#N/A	#N/A	0	0	0	0	0	1	0	0	0	0	1	0	0	0	0	0	1	0	0	0	0	0	0	0	Bacteria|Firmicutes|Clostridia|Clostridiales
322839	23	1.14147	0	3	-0.475971	0.444444	8	2.85774	0	2	1208	8710	4492	2521	6376	0	7344	48	9127	736	7244	12563	2100	3885	7336	3	3623	4562	31	3747	9369	5419	71	Bacteria|Firmicutes|Clostridia|Clostridiales
336398	#N/A	#N/A	#N/A	#N/A	#N/A	#N/A	#N/A	#N/A	#N/A	0	0	0	0	0	0	0	0	0	0	0	2	0	0	0	0	0	1	0	0	0	0	0	0	Bacteria|Firmicutes|Clostridia|Clostridiales
266247	3	0.885615	0.32	1	0.534994	0	40	0	0	317	255	364	41	228	40	141	129	2	350	633	233	195	227	90	42	128	172	443	147	58	239	339	189	Bacteria|Firmicutes|Clostridia|Clostridiales|Lachnospiraceae
581021	#N/A	#N/A	#N/A	#N/A	#N/A	#N/A	#N/A	#N/A	#N/A	0	3	3	1	0	0	0	0	0	0	0	3	1	0	0	0	139	1	0	0	0	0	4	0	Bacteria|Proteobacteria|Gammaproteobacteria|Enterobacteriales|Enterobacteriaceae
333079	#N/A	#N/A	#N/A	#N/A	#N/A	#N/A	#N/A	#N/A	#N/A	0	0	0	0	1	0	0	0	0	0	0	0	0	0	0	0	0	1	1	0	0	0	0	0	Bacteria|Firmicutes|Clostridia|Clostridiales|Ruminococcaceae|Ruminococcus
1106006	#N/A	#N/A	#N/A	#N/A	#N/A	#N/A	#N/A	#N/A	#N/A	0	1	2	1	0	0	0	0	0	1	4	0	0	0	0	0	0	0	0	0	0	0	0	0	Bacteria|Firmicutes|Clostridia|Clostridiales|Ruminococcaceae|Ruminococcus
277224	15	2.11058	0	0	-0.544331	0	#N/A	#N/A	#N/A	0	6	0	1	0	7	1	0	0	6	2	2	0	0	7	7	4	4	0	0	0	0	0	0	Bacteria|Firmicutes|Clostridia|Clostridiales
348336	3	0.265684	0	9	1.33151	0.165289	#N/A	#N/A	#N/A	245	451	739	115	522	650	396	1086	80	1943	1746	684	499	411	1152	143	891	281	765	542	235	3264	1398	373	Bacteria|Firmicutes|Clostridia|Clostridiales
741001	18	-0.0504219	0	40	0	0	2	-1.42589	0	16	11	4	6	4	8	9	0	1	14	0	18	8	21	15	6	0	17	1	0	12	4	1	5	Bacteria|Bacteroidetes|Bacteroidia|Bacteroidales|S24-7
4368944	#N/A	#N/A	#N/A	#N/A	#N/A	#N/A	#N/A	#N/A	#N/A	0	0	0	0	0	0	0	0	0	0	0	0	0	0	0	0	0	0	0	0	0	0	1	0	Bacteria|Firmicutes|Clostridia|Clostridiales
4460680	#N/A	#N/A	#N/A	#N/A	#N/A	#N/A	#N/A	#N/A	#N/A	0	0	0	0	0	0	0	0	0	0	0	0	0	0	0	0	5	0	0	0	0	0	0	3	Bacteria|Firmicutes|Clostridia|Clostridiales|Ruminococcaceae
325182	#N/A	#N/A	#N/A	#N/A	#N/A	#N/A	#N/A	#N/A	#N/A	0	0	0	0	0	0	0	0	0	0	0	0	0	0	0	1	2	1	0	0	0	0	0	0	Bacteria|Firmicutes|Clostridia|Clostridiales
196856	#N/A	#N/A	#N/A	#N/A	#N/A	#N/A	#N/A	#N/A	#N/A	0	0	0	0	0	0	0	0	0	0	0	0	0	0	0	0	0	0	0	0	0	0	1	0	Bacteria|Firmicutes|Clostridia|Clostridiales
188878	#N/A	#N/A	#N/A	#N/A	#N/A	#N/A	#N/A	#N/A	#N/A	0	0	0	0	0	0	0	0	0	0	0	0	0	0	3	0	0	0	0	1	1	0	0	0	Bacteria|Firmicutes|Clostridia|Clostridiales
328598	#N/A	#N/A	#N/A	#N/A	#N/A	#N/A	#N/A	#N/A	#N/A	0	0	0	0	0	0	0	0	0	0	0	0	0	0	0	0	0	0	0	0	0	0	0	2	Bacteria|Firmicutes|Clostridia|Clostridiales|Lachnospiraceae
176118	#N/A	#N/A	#N/A	#N/A	#N/A	#N/A	#N/A	#N/A	#N/A	0	0	0	0	1	0	0	0	0	1	0	0	0	0	0	0	0	0	0	0	0	0	0	0	Bacteria|Firmicutes|Clostridia|Clostridiales|Ruminococcaceae|Oscillospira
260705	#N/A	#N/A	#N/A	#N/A	#N/A	#N/A	#N/A	#N/A	#N/A	1	0	0	0	0	0	0	0	0	0	1	0	0	0	0	0	0	0	0	0	0	1	0	0	Bacteria|Firmicutes|Clostridia|Clostridiales
185552	#N/A	#N/A	#N/A	#N/A	#N/A	#N/A	#N/A	#N/A	#N/A	0	0	0	0	0	0	0	0	0	0	0	0	0	0	5	0	0	0	0	0	0	0	0	0	Bacteria|Firmicutes|Clostridia|Clostridiales
358007	#N/A	#N/A	#N/A	#N/A	#N/A	#N/A	#N/A	#N/A	#N/A	0	0	0	0	0	0	0	1	0	0	0	0	0	0	0	0	0	0	0	0	0	0	0	0	Bacteria|Firmicutes|Clostridia|Clostridiales
261140	0	0.278128	0	5	-0.410391	0	9	-1.07011	0.5	1	0	0	0	2	0	3	2	1	0	0	2	2	4	1	3	10	5	16	0	0	1	2	1	Bacteria|Firmicutes|Erysipelotrichi|Erysipelotrichales|Erysipelotrichaceae|Allobaculum
661259	#N/A	#N/A	#N/A	#N/A	#N/A	#N/A	#N/A	#N/A	#N/A	0	0	0	0	0	0	0	0	0	0	0	0	0	1	0	0	0	0	0	0	0	1	0	0	Bacteria|Firmicutes|Bacilli|Lactobacillales|Streptococcaceae|Streptococcus
261142	9	-1.40183	0	4	-1.03693	0	11	-0.6	0.444444	0	19	0	13	6	1	3	0	0	35	10	4	30	0	0	3	9	18	0	0	5	15	0	0	Bacteria|Firmicutes|Clostridia|Clostridiales
349798	12	-0.0987462	0	#N/A	#N/A	#N/A	35	0	0	1421	145	128	2303	1049	1563	98	1414	238	431	309	147	328	302	5176	3320	1622	144	10166	1402	343	269	202	298	Bacteria|Firmicutes|Clostridia|Clostridiales|Ruminococcaceae|Oscillospira
208571	#N/A	#N/A	#N/A	4	-0.230429	0	0	1.13025	0.207612	19	17	0	7	9	19	14	127	1	3	5	19	33	28	128	37	69	49	71	35	3	6	12	7	Bacteria|Firmicutes|Clostridia|Clostridiales|Lachnospiraceae|Coprococcus
198701	#N/A	#N/A	#N/A	#N/A	#N/A	#N/A	#N/A	#N/A	#N/A	0	0	1	0	0	0	1	0	0	0	0	0	0	0	0	0	0	0	0	0	0	0	0	0	Bacteria|Firmicutes|Clostridia|Clostridiales
561826	#N/A	#N/A	#N/A	#N/A	#N/A	#N/A	7	0.508001	0	28	77	19	15	31	54	17	40	13	131	37	13	20	15	23	38	88	70	134	29	9	74	42	11	Bacteria|Firmicutes|Clostridia|Clostridiales|Christensenellaceae
1109864	#N/A	#N/A	#N/A	#N/A	#N/A	#N/A	#N/A	#N/A	#N/A	0	0	1	0	0	0	1	1	0	0	0	0	0	0	0	0	0	0	0	0	0	0	0	0	Bacteria|Firmicutes|Clostridia|Clostridiales
270248	#N/A	#N/A	#N/A	#N/A	#N/A	#N/A	#N/A	#N/A	#N/A	0	0	0	0	0	0	0	0	0	0	1	0	0	1	2	1	0	0	1	0	0	1	0	0	Bacteria|Bacteroidetes|Bacteroidia|Bacteroidales|Rikenellaceae
290338	#N/A	#N/A	#N/A	#N/A	#N/A	#N/A	#N/A	#N/A	#N/A	0	0	0	0	0	0	0	0	0	0	0	0	0	242	0	0	0	0	0	0	0	0	0	0	Bacteria|Firmicutes|Clostridia|Clostridiales
4302904	#N/A	#N/A	#N/A	#N/A	#N/A	#N/A	#N/A	#N/A	#N/A	0	0	0	0	0	0	0	0	0	0	0	0	0	0	0	0	0	0	0	0	1	0	3	0	Bacteria|Bacteroidetes|Bacteroidia|Bacteroidales|Bacteroidaceae|Bacteroides
271317	15	-0.603023	0	0	0.816497	0	13	0.881917	0	1	298	0	75	0	437	40	1	6	367	137	115	1	1	391	548	276	151	0	1	0	1	0	229	Bacteria|Firmicutes|Clostridia|Clostridiales
167034	#N/A	#N/A	#N/A	#N/A	#N/A	#N/A	#N/A	#N/A	#N/A	0	0	0	0	0	0	0	0	0	0	0	0	0	0	0	0	0	0	0	0	1	0	0	0	Bacteria|Firmicutes|Clostridia|Clostridiales|Ruminococcaceae|Oscillospira
278684	#N/A	#N/A	#N/A	#N/A	#N/A	#N/A	#N/A	#N/A	#N/A	0	0	0	1	0	0	0	0	0	0	0	0	0	0	0	0	0	0	0	0	0	0	0	0	Bacteria|Bacteroidetes|Bacteroidia|Bacteroidales|S24-7
305127	#N/A	#N/A	#N/A	#N/A	#N/A	#N/A	#N/A	#N/A	#N/A	0	0	0	0	0	0	0	1	1	0	0	0	0	0	0	0	0	0	0	1	0	0	0	0	Bacteria|Firmicutes|Clostridia|Clostridiales|Dehalobacteriaceae|Dehalobacterium
357046	#N/A	#N/A	#N/A	#N/A	#N/A	#N/A	9	-1.07011	0	0	0	0	1	0	5	0	2	0	0	1	0	0	0	1	1	1	2	2	8	8	2	0	3	Bacteria|Bacteroidetes|Bacteroidia|Bacteroidales|Rikenellaceae
114000	#N/A	#N/A	#N/A	#N/A	#N/A	#N/A	#N/A	#N/A	#N/A	0	0	0	0	0	0	0	0	0	1	0	0	0	1	0	0	0	0	0	0	0	0	0	0	Bacteria|Firmicutes|Clostridia|Clostridiales|Ruminococcaceae
289379	#N/A	#N/A	#N/A	#N/A	#N/A	#N/A	#N/A	#N/A	#N/A	0	0	2	0	1	1	0	0	0	1	1	0	0	0	1	0	0	0	0	0	0	2	0	0	Bacteria|Firmicutes|Clostridia|Clostridiales|Lachnospiraceae|[Ruminococcus]|gnavus
314058	8	-1.03078	0	9	-0.833271	0	7	-0.254	0.444444	2	13	4	3	1	18	3	16	0	8	9	8	1	3	2	9	13	4	31	6	2	23	3	3	Bacteria|Firmicutes|Clostridia|Clostridiales|Lachnospiraceae
185420	#N/A	#N/A	#N/A	#N/A	#N/A	#N/A	17	0.42135	0.48	0	0	0	0	0	0	2	0	0	0	0	1	2	0	0	0	0	1	2	6	1	0	0	0	Bacteria|Bacteroidetes|Bacteroidia|Bacteroidales|Bacteroidaceae|Bacteroides
269501	#N/A	#N/A	#N/A	#N/A	#N/A	#N/A	#N/A	#N/A	#N/A	0	1	0	0	2	1	0	0	0	4	0	0	0	0	0	0	1	0	0	3	0	1	0	0	Bacteria|Firmicutes|Clostridia|Clostridiales
190673	#N/A	#N/A	#N/A	#N/A	#N/A	#N/A	#N/A	#N/A	#N/A	0	0	0	0	0	0	0	0	0	1	1	0	0	0	0	0	0	0	0	0	0	0	0	0	Bacteria|Bacteroidetes|Bacteroidia|Bacteroidales|S24-7
199273	#N/A	#N/A	#N/A	#N/A	#N/A	#N/A	#N/A	#N/A	#N/A	0	0	0	0	0	0	0	0	0	0	0	0	0	0	0	0	0	0	1	0	0	0	0	0	Bacteria|Bacteroidetes|Bacteroidia|Bacteroidales|S24-7
185036	#N/A	#N/A	#N/A	#N/A	#N/A	#N/A	#N/A	#N/A	#N/A	0	0	1	1	0	0	0	0	0	0	3	1	0	0	0	0	0	0	0	0	1	0	1	0	Bacteria|Bacteroidetes|Bacteroidia|Bacteroidales|S24-7
321251	#N/A	#N/A	#N/A	#N/A	#N/A	#N/A	#N/A	#N/A	#N/A	0	0	1	0	0	0	0	0	0	0	0	0	0	0	0	0	1	0	0	0	0	0	0	0	Bacteria|Firmicutes|Clostridia|Clostridiales|Ruminococcaceae|Ruminococcus
268581	#N/A	#N/A	#N/A	#N/A	#N/A	#N/A	#N/A	#N/A	#N/A	0	0	0	0	0	0	0	0	0	0	0	0	0	0	0	0	0	0	0	0	0	1	0	0	Bacteria|Firmicutes|Clostridia|Clostridiales
1136443	#N/A	#N/A	#N/A	5	-1.02598	0	#N/A	#N/A	#N/A	1148	889	5186	1072	4998	1436	7606	7783	170	3622	966	2182	446	838	1019	577	3188	784	349	2393	714	2218	608	959	Bacteria|Deferribacteres|Deferribacteres|Deferribacterales|Deferribacteraceae|Mucispirillum|schaedleri
404204	#N/A	#N/A	#N/A	#N/A	#N/A	#N/A	#N/A	#N/A	#N/A	0	0	0	0	0	0	0	0	0	0	0	0	0	0	0	0	0	0	1	0	0	0	0	0	Bacteria|Firmicutes|Bacilli|Bacillales|Staphylococcaceae|Staphylococcus
269616	#N/A	#N/A	#N/A	#N/A	#N/A	#N/A	#N/A	#N/A	#N/A	0	0	0	0	0	0	0	0	0	0	0	0	0	0	0	0	0	0	1	0	0	1	0	0	Bacteria|Firmicutes|Clostridia|Clostridiales
264248	#N/A	#N/A	#N/A	#N/A	#N/A	#N/A	#N/A	#N/A	#N/A	0	0	0	0	0	0	0	0	0	0	0	0	0	0	0	0	0	1	0	0	0	0	0	0	Bacteria|Firmicutes|Clostridia|Clostridiales|Lachnospiraceae|[Ruminococcus]|gnavus
376516	#N/A	#N/A	#N/A	#N/A	#N/A	#N/A	#N/A	#N/A	#N/A	0	1	0	0	0	0	0	1	0	0	0	0	0	0	6	0	0	0	0	0	0	0	0	0	Bacteria|Firmicutes|Clostridia|Clostridiales
189024	#N/A	#N/A	#N/A	#N/A	#N/A	#N/A	#N/A	#N/A	#N/A	0	0	2	0	0	0	0	0	0	0	0	0	0	1	0	0	0	0	0	0	0	0	4	0	Bacteria|Firmicutes|Clostridia|Clostridiales
780555	#N/A	#N/A	#N/A	#N/A	#N/A	#N/A	#N/A	#N/A	#N/A	0	0	0	1	0	0	0	0	0	0	0	0	0	0	0	0	0	0	0	0	0	0	0	0	Bacteria|Proteobacteria|Gammaproteobacteria|Pseudomonadales|Pseudomonadaceae|Pseudomonas
349175	#N/A	#N/A	#N/A	#N/A	#N/A	#N/A	#N/A	#N/A	#N/A	0	0	0	0	0	0	0	0	1	0	0	0	0	0	0	0	0	0	0	0	0	0	0	0	Bacteria|Bacteroidetes|Bacteroidia|Bacteroidales|S24-7
772010	#N/A	#N/A	#N/A	#N/A	#N/A	#N/A	#N/A	#N/A	#N/A	1	1	0	0	1	0	0	0	0	0	0	0	0	0	0	0	0	0	0	0	0	0	0	0	Bacteria|Firmicutes|Clostridia|Clostridiales
583656	#N/A	#N/A	#N/A	#N/A	#N/A	#N/A	#N/A	#N/A	#N/A	18	151	39	7	5	0	0	0	0	0	1	0	42	0	0	0	0	0	0	0	49	24	356	0	Bacteria|Bacteroidetes|Bacteroidia|Bacteroidales|Bacteroidaceae|Bacteroides
271045	#N/A	#N/A	#N/A	#N/A	#N/A	#N/A	#N/A	#N/A	#N/A	2	1	0	0	0	0	0	1	0	1	2	0	0	1	0	0	0	0	0	0	0	1	0	0	Bacteria|Firmicutes|Clostridia|Clostridiales|Lachnospiraceae
275543	#N/A	#N/A	#N/A	#N/A	#N/A	#N/A	#N/A	#N/A	#N/A	0	0	0	0	0	0	0	0	0	0	1	0	0	0	0	0	0	1	0	0	0	0	0	0	Bacteria|Firmicutes|Clostridia|Clostridiales|Ruminococcaceae
829302	#N/A	#N/A	#N/A	#N/A	#N/A	#N/A	#N/A	#N/A	#N/A	0	0	0	0	1	0	0	0	0	0	0	0	0	0	0	0	0	0	0	0	0	0	0	0	Bacteria|Bacteroidetes|Bacteroidia|Bacteroidales|S24-7
421893	#N/A	#N/A	#N/A	#N/A	#N/A	#N/A	#N/A	#N/A	#N/A	0	0	0	0	0	0	0	0	0	0	0	0	0	1	0	0	0	0	0	0	0	0	0	0	Bacteria|Firmicutes|Clostridia|Clostridiales
574689	#N/A	#N/A	#N/A	#N/A	#N/A	#N/A	#N/A	#N/A	#N/A	0	2	0	0	0	0	0	0	0	0	0	0	0	0	0	0	0	0	0	0	0	0	0	0	Bacteria|Firmicutes|Clostridia|Clostridiales|Lachnospiraceae
4296216	#N/A	#N/A	#N/A	#N/A	#N/A	#N/A	#N/A	#N/A	#N/A	0	1	2	1	0	0	0	0	0	0	0	1	1	0	0	0	0	0	0	0	0	0	0	0	Bacteria|Firmicutes|Clostridia|Clostridiales|Ruminococcaceae|Ruminococcus
113919	#N/A	#N/A	#N/A	#N/A	#N/A	#N/A	#N/A	#N/A	#N/A	0	0	0	0	0	0	0	0	0	0	1	0	0	0	0	0	0	0	0	0	0	0	0	0	Bacteria|Bacteroidetes|Bacteroidia|Bacteroidales|S24-7
331281	#N/A	#N/A	#N/A	#N/A	#N/A	#N/A	#N/A	#N/A	#N/A	0	0	0	0	0	0	0	0	0	0	0	0	0	1	0	0	0	0	0	0	0	0	0	0	Bacteria|Firmicutes|Clostridia|Clostridiales|Clostridiaceae
839598	#N/A	#N/A	#N/A	4	-0.230429	0	#N/A	#N/A	#N/A	0	1	1	9	0	0	0	0	0	9	6	2	4	4	1	2	1	0	0	18	4	0	0	0	Bacteria|Firmicutes|Clostridia|Clostridiales
2497335	23	-0.496292	0	13	0.408248	0	#N/A	#N/A	#N/A	6	4	5	3	3	3	12	2	1	2	6	0	4	1	5	8	1	1	6	2	32	7	3	4	Bacteria|Bacteroidetes|Bacteroidia|Bacteroidales|Porphyromonadaceae|Parabacteroides|distasonis
416078	0	1.42336	0.277778	#N/A	#N/A	#N/A	5	-0.434372	0	6	0	0	0	1	1	0	2	1	0	0	0	1	0	1	0	0	2	2229	175	0	112	0	367	Bacteria|Bacteroidetes|Bacteroidia|Bacteroidales|S24-7
4377150	#N/A	#N/A	#N/A	#N/A	#N/A	#N/A	#N/A	#N/A	#N/A	0	0	1	0	0	0	0	0	0	0	0	0	0	0	0	0	0	0	0	0	0	0	0	0	Bacteria|Firmicutes|Clostridia|Clostridiales
275123	#N/A	#N/A	#N/A	#N/A	#N/A	#N/A	8	0.408248	0	0	0	0	0	2	0	2	0	0	0	0	0	0	0	0	0	0	0	1	0	4	2	2	0	Bacteria|Firmicutes|Clostridia|Clostridiales
341213	12	2.00784	0	10	0	0	2	0.609117	0.32	17	0	0	3	0	19	0	71	33	0	0	34	0	13	1	30	72	34	50	52	15	0	0	0	Bacteria|Firmicutes|Clostridia|Clostridiales|Lachnospiraceae
345862	3	-0.354246	0.5	#N/A	#N/A	#N/A	19	0.956325	0	1	9	46	1	17	0	16	2	16	1	2	0	1	7	2	1	48	0	0	28	15	1	0	13	Bacteria|Firmicutes|Clostridia|Clostridiales
1108422	#N/A	#N/A	#N/A	#N/A	#N/A	#N/A	#N/A	#N/A	#N/A	2	0	0	0	1	1	0	0	0	0	0	2	0	0	0	0	0	0	0	0	0	0	0	0	Bacteria|Bacteroidetes|Bacteroidia|Bacteroidales|S24-7
231510	8	-1.03078	0	11	2.81113	0	10	-0.302532	0.75	5	0	0	3	2	0	5	0	2	0	0	0	0	3	5	7	7	2	5	0	0	0	1	0	Bacteria|Actinobacteria|Coriobacteriia|Coriobacteriales|Coriobacteriaceae|Adlercreutzia
264734	48	0	0	2	-0.68313	0	24	0.894427	0	6047	1563	1672	1912	2884	1641	1242	831	428	2599	1673	1560	2717	4817	1870	2409	5449	5775	4102	10526	1317	1018	2185	1773	Bacteria|Bacteroidetes|Bacteroidia|Bacteroidales|S24-7
2051608	#N/A	#N/A	#N/A	#N/A	#N/A	#N/A	#N/A	#N/A	#N/A	0	0	0	0	0	0	0	0	0	0	0	0	1	0	0	0	0	0	0	0	0	0	0	0	Bacteria|Firmicutes|Clostridia|Clostridiales|Lachnospiraceae
2901239	#N/A	#N/A	#N/A	13	0.408248	0	17	-1.14367	0	0	0	0	0	0	0	0	1	0	0	3	0	1	0	3	1	3	1	1	1	1	0	5	2	Bacteria|Firmicutes|Clostridia|Clostridiales|Lachnospiraceae|[Ruminococcus]|gnavus
260397	16	1.33631	0	#N/A	#N/A	#N/A	#N/A	#N/A	#N/A	0	2	0	0	1	1	1	0	0	1	0	0	0	0	0	2	1	0	0	0	0	0	0	0	Bacteria|Firmicutes|Erysipelotrichi|Erysipelotrichales|Erysipelotrichaceae|Allobaculum
364753	#N/A	#N/A	#N/A	#N/A	#N/A	#N/A	#N/A	#N/A	#N/A	0	0	0	0	0	0	0	0	0	0	0	0	0	0	0	1	0	0	0	0	0	0	0	1	Bacteria|Firmicutes|Clostridia|Clostridiales|Lachnospiraceae|Anaerostipes
271689	3	0.265684	0	9	-0.352207	0	1	0.182956	0	1	3	3	1	9	0	4	5	0	2	7	3	1	6	2	2	3	4	4	8	3	3	3	1	Bacteria|Firmicutes|Clostridia|Clostridiales|Ruminococcaceae|Oscillospira
275305	#N/A	#N/A	#N/A	#N/A	#N/A	#N/A	#N/A	#N/A	#N/A	0	0	0	0	1	0	0	0	1	0	0	0	0	0	0	0	0	0	0	0	0	0	0	0	Bacteria|Firmicutes|Clostridia|Clostridiales
1110412	#N/A	#N/A	#N/A	8	-0.210105	0.375	5	-0.434372	0.444444	12	5	3	1	7	1	2	4	1	5	17	2	1	2	2	1	0	7	5	3	0	8	9	4	Bacteria|Firmicutes|Clostridia|Clostridiales|[Mogibacteriaceae]
290607	#N/A	#N/A	#N/A	#N/A	#N/A	#N/A	#N/A	#N/A	#N/A	0	0	0	0	0	0	0	0	0	0	0	0	0	0	0	0	0	0	0	0	1	0	0	0	Bacteria|Firmicutes|Clostridia|Clostridiales|Lachnospiraceae
1111142	#N/A	#N/A	#N/A	#N/A	#N/A	#N/A	#N/A	#N/A	#N/A	1	0	0	0	0	0	0	0	0	0	0	0	0	1	0	0	0	0	1	1	0	0	0	0	Bacteria|Firmicutes|Clostridia|Clostridiales
234912	#N/A	#N/A	#N/A	#N/A	#N/A	#N/A	#N/A	#N/A	#N/A	0	0	0	0	0	0	0	0	0	0	0	0	0	1	0	0	5	0	0	0	0	0	0	0	Bacteria|Firmicutes|Clostridia|Clostridiales|Clostridiaceae|Clostridium
189920	#N/A	#N/A	#N/A	#N/A	#N/A	#N/A	#N/A	#N/A	#N/A	0	1	0	0	0	0	0	0	0	0	0	0	0	0	0	0	0	0	0	0	0	0	0	0	Bacteria|Bacteroidetes|Bacteroidia|Bacteroidales|Bacteroidaceae|Bacteroides
142444	#N/A	#N/A	#N/A	#N/A	#N/A	#N/A	#N/A	#N/A	#N/A	0	0	1	0	0	0	0	0	0	0	0	0	0	0	0	0	0	0	0	0	0	0	0	0	Bacteria|Actinobacteria|Coriobacteriia|Coriobacteriales|Coriobacteriaceae
296869	#N/A	#N/A	#N/A	#N/A	#N/A	#N/A	#N/A	#N/A	#N/A	0	0	1	0	0	0	0	1	0	0	1	0	0	0	0	0	0	1	1	0	0	0	2	0	Bacteria|Firmicutes|Clostridia|Clostridiales|Lachnospiraceae|[Ruminococcus]|gnavus
318583	#N/A	#N/A	#N/A	#N/A	#N/A	#N/A	#N/A	#N/A	#N/A	0	0	0	0	1	0	0	0	0	0	0	0	0	0	0	0	0	0	0	0	0	0	0	0	Bacteria|Firmicutes|Bacilli|Lactobacillales|Lactobacillaceae|Lactobacillus
199534	0	-0.294489	0.5	#N/A	#N/A	#N/A	4	-1.00037	0	365	104	26	610	251	433	0	539	97	53	0	128	343	79	359	969	114	755	3	0	181	485	292	124	Bacteria|Bacteroidetes|Bacteroidia|Bacteroidales|Rikenellaceae
183446	28	-0.57735	0	1	-0.237775	0	#N/A	#N/A	#N/A	0	2	4	2	1	2	0	0	0	1	2	2	1	1	0	0	0	0	0	0	1	0	3	0	Bacteria|Bacteroidetes|Bacteroidia|Bacteroidales|S24-7
267612	#N/A	#N/A	#N/A	#N/A	#N/A	#N/A	#N/A	#N/A	#N/A	1	0	0	0	1	0	0	1	0	0	0	1	0	0	0	0	0	0	0	1	0	1	0	0	Bacteria|Firmicutes|Clostridia|Clostridiales|Ruminococcaceae|Oscillospira
848267	#N/A	#N/A	#N/A	#N/A	#N/A	#N/A	#N/A	#N/A	#N/A	0	0	0	0	0	0	0	0	1	0	0	0	0	0	0	0	0	0	0	0	0	0	0	0	Bacteria|Proteobacteria|Gammaproteobacteria|Pseudomonadales|Moraxellaceae|Acinetobacter
273686	#N/A	#N/A	#N/A	#N/A	#N/A	#N/A	#N/A	#N/A	#N/A	0	2	0	0	1	0	1	0	0	0	0	1	4	7	0	0	0	0	0	0	0	0	0	1	Bacteria|Firmicutes|Clostridia|Clostridiales|Lachnospiraceae
324820	#N/A	#N/A	#N/A	#N/A	#N/A	#N/A	#N/A	#N/A	#N/A	0	0	0	0	0	0	3	0	0	0	0	0	0	0	0	0	0	0	0	0	0	0	0	0	Bacteria|Firmicutes|Clostridia|Clostridiales|Ruminococcaceae
826302	0	-0.294489	0	#N/A	#N/A	#N/A	#N/A	#N/A	#N/A	1	0	0	4	1	2	9	5	1	0	3	0	2	1	1	0	1	0	3	0	0	0	1	0	Bacteria|Firmicutes|Clostridia|Clostridiales|Lachnospiraceae|Coprococcus
965129	#N/A	#N/A	#N/A	#N/A	#N/A	#N/A	#N/A	#N/A	#N/A	0	0	0	0	0	2	0	0	0	0	0	1	0	0	0	0	0	0	0	1	0	0	1	0	Bacteria|Proteobacteria|Alphaproteobacteria|Sphingomonadales|Sphingomonadaceae
354957	6	-1.26035	0	#N/A	#N/A	#N/A	16	2.19296	0	16	16	1	1	30	8	20	3	4	10	24	8	2	4	1	6	14	1	19	14	17	3	12	1	Bacteria|Firmicutes|Clostridia|Clostridiales
229683	#N/A	#N/A	#N/A	#N/A	#N/A	#N/A	#N/A	#N/A	#N/A	0	0	0	0	0	0	0	0	0	0	0	0	0	2	1	0	0	0	0	0	0	0	0	0	Bacteria|Firmicutes|Clostridia|Clostridiales|Ruminococcaceae|Oscillospira
548021	#N/A	#N/A	#N/A	#N/A	#N/A	#N/A	#N/A	#N/A	#N/A	0	0	1	0	0	0	0	0	0	0	0	0	0	0	0	0	1	0	0	0	0	0	0	0	Bacteria|Firmicutes|Clostridia|Clostridiales
299474	#N/A	#N/A	#N/A	#N/A	#N/A	#N/A	#N/A	#N/A	#N/A	0	0	0	0	0	0	0	0	0	0	0	0	0	0	0	0	0	0	1	0	0	0	0	0	Bacteria|Firmicutes|Clostridia|Clostridiales|Clostridiaceae
312531	#N/A	#N/A	#N/A	#N/A	#N/A	#N/A	#N/A	#N/A	#N/A	0	0	0	11	0	4	0	0	0	0	0	0	0	0	0	0	0	0	0	0	0	0	3	0	Bacteria|Proteobacteria|Gammaproteobacteria|Pseudomonadales|Moraxellaceae|Acinetobacter
4439360	#N/A	#N/A	#N/A	#N/A	#N/A	#N/A	#N/A	#N/A	#N/A	0	0	0	0	0	0	0	0	0	0	0	0	0	0	0	0	0	0	0	0	1	0	0	0	Bacteria|Bacteroidetes|Bacteroidia|Bacteroidales|Bacteroidaceae|Bacteroides
355771	#N/A	#N/A	#N/A	#N/A	#N/A	#N/A	#N/A	#N/A	#N/A	0	0	0	0	0	0	0	0	3	0	12	0	0	0	3	0	0	0	0	0	0	0	0	0	Bacteria|Firmicutes|Clostridia|Clostridiales|Lachnospiraceae
305803	#N/A	#N/A	#N/A	#N/A	#N/A	#N/A	#N/A	#N/A	#N/A	0	1	0	0	0	0	1	0	0	0	1	1	0	0	0	0	0	0	0	0	0	0	0	0	Bacteria|Firmicutes|Clostridia|Clostridiales
267298	#N/A	#N/A	#N/A	#N/A	#N/A	#N/A	#N/A	#N/A	#N/A	0	0	0	0	0	0	0	0	0	0	1	0	0	0	0	0	1	0	1	0	0	0	0	1	Bacteria|Firmicutes|Clostridia|Clostridiales|Lachnospiraceae|[Ruminococcus]|gnavus
228374	#N/A	#N/A	#N/A	#N/A	#N/A	#N/A	#N/A	#N/A	#N/A	0	0	0	0	0	0	0	0	0	0	0	0	0	0	0	1	0	0	0	0	0	0	0	0	Bacteria|Bacteroidetes|Bacteroidia|Bacteroidales|S24-7
263138	#N/A	#N/A	#N/A	#N/A	#N/A	#N/A	#N/A	#N/A	#N/A	0	0	0	0	0	0	0	0	0	0	0	0	0	0	0	0	1	0	0	0	0	0	0	0	Bacteria|Firmicutes|Clostridia|Clostridiales|Lachnospiraceae|[Ruminococcus]|gnavus
262554	#N/A	#N/A	#N/A	#N/A	#N/A	#N/A	#N/A	#N/A	#N/A	0	0	0	0	0	0	0	0	0	0	3	0	1	0	0	0	0	0	0	0	0	0	0	0	Bacteria|Firmicutes|Clostridia|Clostridiales|Ruminococcaceae
180082	2	1.18583	0	#N/A	#N/A	#N/A	39	0	0	2358	7241	2470	10791	3557	4517	0	1851	457	1117	0	2097	1808	1895	2311	2490	3	3523	9	4	1	5	0	3537	Bacteria|Bacteroidetes|Bacteroidia|Bacteroidales|Porphyromonadaceae|Parabacteroides
318764	#N/A	#N/A	#N/A	#N/A	#N/A	#N/A	#N/A	#N/A	#N/A	0	1	0	0	0	0	0	0	1	1	0	0	0	0	0	0	0	0	1	0	0	0	0	0	Bacteria|Firmicutes|Bacilli|Lactobacillales|Lactobacillaceae|Lactobacillus
813217	#N/A	#N/A	#N/A	#N/A	#N/A	#N/A	#N/A	#N/A	#N/A	0	0	0	0	0	0	0	1	0	0	0	2	0	9	7	0	2	7	0	0	0	0	0	0	Bacteria|Proteobacteria|Gammaproteobacteria|Enterobacteriales|Enterobacteriaceae|Klebsiella
262394	#N/A	#N/A	#N/A	#N/A	#N/A	#N/A	#N/A	#N/A	#N/A	0	0	0	0	0	0	0	1	0	0	0	0	0	0	0	0	1	0	0	0	0	0	0	0	Bacteria|Firmicutes|Clostridia|Clostridiales
312455	4	-0.0980581	0.444444	#N/A	#N/A	#N/A	#N/A	#N/A	#N/A	0	0	0	4	1	2	0	5	0	0	0	0	0	0	2	4	3	0	8	2	0	0	0	0	Bacteria|Firmicutes|Clostridia|Clostridiales|Ruminococcaceae|Oscillospira
628218	14	0	0	#N/A	#N/A	#N/A	#N/A	#N/A	#N/A	0	0	11	0	27	40	46	19	0	0	0	0	0	3	19	63	0	0	28	0	21	0	0	0	Bacteria|Firmicutes|Clostridia|Clostridiales
185222	4	-1.12767	0	9	-0.111675	0	5	0.0723954	0	320	41	103	51	32	17	60	39	0	67	21	126	69	461	106	3	0	61	65	116	0	9	88	77	Bacteria|Firmicutes|Clostridia|Clostridiales|Clostridiaceae
457371	17	1.68585	0.244898	9	-0.352207	0	35	0	0	44	28	24	10	67	29	41	21	2	107	48	17	21	23	65	18	114	23	74	44	37	42	7	38	Bacteria|Firmicutes|Clostridia|Clostridiales|Lachnospiraceae
276149	16	-1.87083	0	39	0	0	38	0	0	122	1552	1024	425	1645	557	5241	253	72	1100	776	328	4932	221	592	419	171	79	972	767	1289	1129	631	132	Bacteria|Bacteroidetes|Bacteroidia|Bacteroidales|Porphyromonadaceae|Parabacteroides
272338	#N/A	#N/A	#N/A	#N/A	#N/A	#N/A	#N/A	#N/A	#N/A	0	1	0	0	0	1	0	0	3	0	0	0	0	0	0	2	0	0	1	0	0	0	0	1	Bacteria|Firmicutes|Erysipelotrichi|Erysipelotrichales|Erysipelotrichaceae|Allobaculum
350392	#N/A	#N/A	#N/A	#N/A	#N/A	#N/A	#N/A	#N/A	#N/A	0	0	0	0	0	1	0	2	0	0	0	0	0	0	0	0	0	0	1	0	0	0	0	0	Bacteria|Firmicutes|Clostridia|Clostridiales
182176	#N/A	#N/A	#N/A	#N/A	#N/A	#N/A	#N/A	#N/A	#N/A	0	1	0	0	0	0	0	0	0	0	1	0	0	0	0	0	0	0	0	0	0	1	0	0	Bacteria|Verrucomicrobia|Verrucomicrobiae|Verrucomicrobiales|Verrucomicrobiaceae|Akkermansia|muciniphila
188786	#N/A	#N/A	#N/A	#N/A	#N/A	#N/A	#N/A	#N/A	#N/A	0	0	0	0	0	0	0	0	0	0	0	0	0	0	0	0	0	0	0	0	0	1	0	1	Bacteria|Firmicutes|Clostridia|Clostridiales
4407603	#N/A	#N/A	#N/A	#N/A	#N/A	#N/A	#N/A	#N/A	#N/A	0	0	0	0	0	0	0	1	0	0	0	1	0	0	0	0	0	0	0	0	0	0	0	0	Bacteria|Actinobacteria|Actinobacteria|Bifidobacteriales|Bifidobacteriaceae|Bifidobacterium
1019465	#N/A	#N/A	#N/A	#N/A	#N/A	#N/A	#N/A	#N/A	#N/A	0	0	0	0	0	0	0	0	0	0	0	0	0	0	0	0	0	0	1	0	0	0	0	0	Bacteria|Firmicutes|Bacilli|Lactobacillales|Lactobacillaceae|Lactobacillus
308684	#N/A	#N/A	#N/A	#N/A	#N/A	#N/A	#N/A	#N/A	#N/A	0	1	0	0	0	1	0	0	0	0	0	1	0	0	0	0	0	0	0	0	0	1	0	0	Bacteria|Firmicutes|Clostridia|Clostridiales|Clostridiaceae
1845355	#N/A	#N/A	#N/A	#N/A	#N/A	#N/A	#N/A	#N/A	#N/A	0	0	0	0	0	0	0	0	1	0	0	0	0	0	0	0	0	0	0	0	0	0	0	0	Bacteria|Firmicutes|Clostridia|Clostridiales|Ruminococcaceae|Oscillospira
214116	#N/A	#N/A	#N/A	#N/A	#N/A	#N/A	0	-0.706407	0	0	0	1	0	0	0	2	0	0	0	0	0	0	0	0	12	0	1	0	0	10	4	6	0	Bacteria|Firmicutes|Clostridia|Clostridiales
266413	#N/A	#N/A	#N/A	#N/A	#N/A	#N/A	#N/A	#N/A	#N/A	0	0	1	0	0	0	0	0	0	0	0	0	0	0	0	0	0	0	0	0	0	0	0	0	Bacteria|Firmicutes|Clostridia|Clostridiales|Lachnospiraceae
266411	#N/A	#N/A	#N/A	#N/A	#N/A	#N/A	#N/A	#N/A	#N/A	0	0	0	0	0	0	0	0	1	0	0	0	0	0	1	0	1	0	0	0	0	0	0	1	Bacteria|Firmicutes|Clostridia|Clostridiales
782953	11	-1.06066	0	39	0	0	6	-0.410152	0	19	8	52	5	54	11	14	13	29	144	12	19	1	46	6	7	87	88	47	3	1	3	4	1	Bacteria|Proteobacteria|Gammaproteobacteria|Enterobacteriales|Enterobacteriaceae
450755	46	0	0	1	-1.01055	0	34	0	0	3	86	41	2	411	47	323	29	0	59	78	26	553	95	8	5	45	41	41	6	0	218	138	14	Bacteria|Firmicutes|Clostridia|Clostridiales
4483046	7	-1.19217	0	14	1.58114	0	3	-0.214886	0	1	0	2	3	3	0	4	1	0	1	0	1	4	1	2	0	0	3	5	4	2	1	0	2	Bacteria|Bacteroidetes|Bacteroidia|Bacteroidales|[Odoribacteraceae]|Butyricimonas
588471	#N/A	#N/A	#N/A	#N/A	#N/A	#N/A	7	-0.254	0	0	96	0	0	9	0	0	0	0	0	125	0	0	107	0	1	1	0	4	0	0	210	268	0	Bacteria|Verrucomicrobia|Verrucomicrobiae|Verrucomicrobiales|Verrucomicrobiaceae|Akkermansia|muciniphila
354736	#N/A	#N/A	#N/A	#N/A	#N/A	#N/A	#N/A	#N/A	#N/A	0	0	0	0	2	0	3	0	0	0	0	0	0	0	0	0	0	1	0	0	0	1	3	0	Bacteria|Firmicutes|Clostridia|Clostridiales
452823	#N/A	#N/A	#N/A	#N/A	#N/A	#N/A	#N/A	#N/A	#N/A	0	0	0	1	0	0	1	0	0	0	0	0	0	0	0	0	0	0	0	0	0	0	0	0	Bacteria|Firmicutes|Bacilli|Lactobacillales|Lactobacillaceae|Lactobacillus
263953	#N/A	#N/A	#N/A	#N/A	#N/A	#N/A	#N/A	#N/A	#N/A	0	0	0	0	0	0	0	1	0	0	1	0	0	0	0	0	0	0	0	0	1	0	1	0	Bacteria|Firmicutes|Clostridia|Clostridiales
181683	#N/A	#N/A	#N/A	#N/A	#N/A	#N/A	31	0	0	0	0	0	0	0	1	0	0	0	2	1	3	0	0	0	0	1	1	1	0	1	3	1	1	Bacteria|Firmicutes|Clostridia|Clostridiales|Lachnospiraceae|[Ruminococcus]|gnavus
258169	46	0	0	#N/A	#N/A	#N/A	10	-1.24374	0	57	201	105	53	120	23	105	210	8	182	59	154	1	110	74	25	232	50	212	99	0	0	19	138	Bacteria|Firmicutes|Clostridia|Clostridiales|Lachnospiraceae
180535	#N/A	#N/A	#N/A	#N/A	#N/A	#N/A	#N/A	#N/A	#N/A	1	0	0	0	1	0	0	0	0	0	0	0	0	0	0	0	0	0	0	0	0	0	0	0	Bacteria|Firmicutes|Clostridia|Clostridiales
593043	#N/A	#N/A	#N/A	#N/A	#N/A	#N/A	#N/A	#N/A	#N/A	0	5	0	0	0	0	0	0	0	0	14	0	0	6	0	0	0	0	1	0	0	4	7	0	Bacteria|Verrucomicrobia|Verrucomicrobiae|Verrucomicrobiales|Verrucomicrobiaceae|Akkermansia|muciniphila
110457	12	0.164577	0	#N/A	#N/A	#N/A	21	-0.707107	0.625	6	0	0	2	0	6	1	7	0	0	0	0	0	0	0	5	0	6	12	2	0	5	2	0	Bacteria|Firmicutes|Clostridia|Clostridiales|Lachnospiraceae
197801	#N/A	#N/A	#N/A	#N/A	#N/A	#N/A	#N/A	#N/A	#N/A	1	0	0	0	0	0	1	0	0	1	0	0	0	0	0	1	0	0	0	0	0	1	0	1	Bacteria|Bacteroidetes|Bacteroidia|Bacteroidales|S24-7
260828	#N/A	#N/A	#N/A	#N/A	#N/A	#N/A	#N/A	#N/A	#N/A	0	0	0	0	0	1	0	0	0	0	0	0	0	0	0	0	0	0	0	0	0	0	0	0	Bacteria|Firmicutes|Clostridia|Clostridiales
261551	#N/A	#N/A	#N/A	#N/A	#N/A	#N/A	#N/A	#N/A	#N/A	0	0	0	0	0	0	0	0	0	1	0	0	0	0	0	0	0	0	0	0	0	0	0	0	Bacteria|Firmicutes|Clostridia|Clostridiales
324112	#N/A	#N/A	#N/A	#N/A	#N/A	#N/A	#N/A	#N/A	#N/A	1	2	1	0	0	0	0	0	0	0	1	2	2	0	0	0	0	0	0	0	0	0	0	0	Bacteria|Firmicutes|Clostridia|Clostridiales
309249	#N/A	#N/A	#N/A	#N/A	#N/A	#N/A	14	0.541931	0	53	190	0	105	144	2	101	258	2	17	103	1	12	82	0	0	34	0	180	30	0	0	84	64	Bacteria|Firmicutes|Clostridia|Clostridiales
277120	26	-0.392232	0	#N/A	#N/A	#N/A	#N/A	#N/A	#N/A	0	0	0	4	2	0	2	2	0	0	0	0	0	0	1	4	0	0	3	0	0	1	0	1	Bacteria|Bacteroidetes|Bacteroidia|Bacteroidales|S24-7
335846	#N/A	#N/A	#N/A	#N/A	#N/A	#N/A	#N/A	#N/A	#N/A	0	0	0	0	0	0	0	0	0	0	0	0	0	0	0	0	0	0	0	0	0	1	0	0	Bacteria|Firmicutes|Clostridia|Clostridiales|Lachnospiraceae
259087	#N/A	#N/A	#N/A	#N/A	#N/A	#N/A	#N/A	#N/A	#N/A	0	1	0	0	0	0	0	0	0	0	0	0	0	0	0	0	0	0	0	0	0	0	0	0	Bacteria|Firmicutes|Clostridia|Clostridiales|Lachnospiraceae|[Ruminococcus]|gnavus
304047	#N/A	#N/A	#N/A	#N/A	#N/A	#N/A	#N/A	#N/A	#N/A	0	0	0	0	0	0	0	0	0	0	0	0	0	0	0	0	0	1	0	0	0	0	0	1	Bacteria|Bacteroidetes|Bacteroidia|Bacteroidales|Bacteroidaceae|Bacteroides|acidifaciens
449353	18	2.77321	0	15	0.894427	0	11	-0.6	0	2	4	6	2	3	3	2	184	0	5	3	4	0	3	406	0	5	5	531	5	1	1	1	0	Bacteria|Firmicutes|Clostridia|Clostridiales|Dehalobacteriaceae|Dehalobacterium
345303	#N/A	#N/A	#N/A	#N/A	#N/A	#N/A	#N/A	#N/A	#N/A	0	0	0	0	0	0	0	0	0	3	0	0	0	0	0	0	0	0	0	0	0	0	0	0	Bacteria|Firmicutes|Clostridia|Clostridiales
266255	#N/A	#N/A	#N/A	#N/A	#N/A	#N/A	#N/A	#N/A	#N/A	0	0	0	0	0	0	0	0	0	0	0	0	0	0	2	0	0	0	0	0	0	0	0	0	Bacteria|Firmicutes|Clostridia|Clostridiales|Ruminococcaceae|Oscillospira
545515	#N/A	#N/A	#N/A	#N/A	#N/A	#N/A	#N/A	#N/A	#N/A	0	0	0	0	0	0	0	0	0	0	0	0	0	0	0	0	1	0	0	0	0	0	0	0	Bacteria|Proteobacteria|Alphaproteobacteria|Rhizobiales
182790	#N/A	#N/A	#N/A	#N/A	#N/A	#N/A	#N/A	#N/A	#N/A	0	0	0	0	0	0	0	0	0	0	0	0	0	0	0	0	0	0	1	0	0	0	0	0	Bacteria|Firmicutes|Clostridia|Clostridiales
196191	17	-0.561951	0	9	-0.352207	0.56	1	0.182956	0	3	3	1	0	4	2	5	2	0	2	6	1	2	3	1	1	4	5	3	3	1	2	5	1	Bacteria|Firmicutes|Clostridia|Clostridiales|Ruminococcaceae|Oscillospira
196194	12	-0.625393	0.375	#N/A	#N/A	#N/A	#N/A	#N/A	#N/A	2	1	1	0	1	2	1	2	0	0	2	2	1	1	5	0	1	1	2	3	2	0	0	1	Bacteria|Firmicutes|Clostridia|Clostridiales|Ruminococcaceae|Oscillospira
276894	10	-0.781736	0	#N/A	#N/A	#N/A	1	-0.41165	0	2	8	0	4	0	3	8	0	2	1	5	17	8	10	3	2	13	13	9	7	4	3	13	2	Bacteria|Bacteroidetes|Bacteroidia|Bacteroidales|S24-7
205160	21	2.36643	0	9	-0.111675	0	7	-0.254	0.444444	50	18	4	27	37	5	33	11	0	35	22	41	28	23	19	13	65	18	69	141	4	24	48	14	Bacteria|Bacteroidetes|Bacteroidia|Bacteroidales|S24-7
348304	35	0	0	8	2.07104	0	28	1.41421	0	18	45	32	42	53	90	50	54	134	40	1	78	75	37	88	121	105	46	3194	24	38	40	103	50	Bacteria|Bacteroidetes|Bacteroidia|Bacteroidales|Bacteroidaceae|Bacteroides
2415144	#N/A	#N/A	#N/A	#N/A	#N/A	#N/A	#N/A	#N/A	#N/A	0	0	0	0	0	0	0	0	0	0	0	0	0	0	0	0	0	0	0	0	0	0	1	0	Bacteria|Bacteroidetes|Bacteroidia|Bacteroidales|Bacteroidaceae|Bacteroides
266761	20	1.08012	0	19	0.5	0	20	-0.707107	0	0	1	1	0	0	1	1	2	0	1	0	1	1	0	1	0	3	1	2	1	0	4	0	1	Bacteria|Firmicutes|Clostridia|Clostridiales|Lachnospiraceae
270015	#N/A	#N/A	#N/A	#N/A	#N/A	#N/A	#N/A	#N/A	#N/A	0	0	1	0	0	0	0	0	0	0	0	0	0	0	0	0	0	0	0	0	0	0	1	0	Bacteria|Firmicutes|Clostridia|Clostridiales|Lachnospiraceae|[Ruminococcus]|gnavus
337379	21	-0.591608	0	#N/A	#N/A	#N/A	#N/A	#N/A	#N/A	0	6	0	11	4	0	13	1	0	0	0	0	0	0	0	0	4	0	0	0	0	0	1	0	Bacteria|Firmicutes|Clostridia|Clostridiales|Clostridiaceae
498743	#N/A	#N/A	#N/A	#N/A	#N/A	#N/A	#N/A	#N/A	#N/A	0	0	0	0	0	0	0	0	0	0	0	0	0	0	0	0	0	0	0	0	0	1	1	1	Bacteria|Firmicutes|Clostridia|Clostridiales|Ruminococcaceae
439457	#N/A	#N/A	#N/A	#N/A	#N/A	#N/A	#N/A	#N/A	#N/A	0	0	0	0	0	0	0	0	0	0	0	0	0	0	0	0	1	0	0	0	0	0	0	0	Bacteria|Firmicutes|Bacilli|Bacillales|[Thermicanaceae]|Thermicanus
188862	#N/A	#N/A	#N/A	#N/A	#N/A	#N/A	#N/A	#N/A	#N/A	0	0	0	0	1	0	0	0	0	0	0	0	0	0	0	0	0	0	1	0	0	0	0	0	Bacteria|Firmicutes|Clostridia|Clostridiales|Ruminococcaceae|Oscillospira
315429	#N/A	#N/A	#N/A	#N/A	#N/A	#N/A	#N/A	#N/A	#N/A	0	0	0	0	0	0	0	0	0	0	0	0	0	0	1	0	0	0	0	0	0	0	0	0	Bacteria|Bacteroidetes|Bacteroidia|Bacteroidales|Bacteroidaceae|Bacteroides
199643	#N/A	#N/A	#N/A	#N/A	#N/A	#N/A	#N/A	#N/A	#N/A	0	0	0	0	0	0	0	0	0	0	0	0	0	0	0	0	0	0	0	0	0	1	0	0	Bacteria|Firmicutes|Clostridia|Clostridiales|Lachnospiraceae|Roseburia
167166	#N/A	#N/A	#N/A	#N/A	#N/A	#N/A	#N/A	#N/A	#N/A	0	0	0	0	0	0	0	1	0	0	0	0	0	0	0	0	0	1	0	0	1	0	0	0	Bacteria|Firmicutes|Clostridia|Clostridiales|Ruminococcaceae|Ruminococcus
263976	#N/A	#N/A	#N/A	#N/A	#N/A	#N/A	7	-1.016	0	2	0	0	2	1	1	1	0	2	0	0	0	0	2	0	4	1	0	1	0	0	1	1	0	Bacteria|Firmicutes|Erysipelotrichi|Erysipelotrichales|Erysipelotrichaceae|Allobaculum
289208	#N/A	#N/A	#N/A	#N/A	#N/A	#N/A	#N/A	#N/A	#N/A	1	2	0	0	0	0	0	0	0	0	0	0	0	0	0	0	0	0	0	2	0	0	1	0	Bacteria|Firmicutes|Clostridia|Clostridiales|Ruminococcaceae
193749	#N/A	#N/A	#N/A	#N/A	#N/A	#N/A	#N/A	#N/A	#N/A	0	0	0	0	0	0	0	0	0	0	1	0	0	0	0	0	1	0	0	0	0	0	0	0	Bacteria|Firmicutes|Clostridia|Clostridiales|Lachnospiraceae|[Ruminococcus]|gnavus
191098	#N/A	#N/A	#N/A	#N/A	#N/A	#N/A	#N/A	#N/A	#N/A	0	0	0	0	0	0	0	1	0	0	0	0	0	1	0	0	1	1	0	1	0	0	0	0	Bacteria|Firmicutes|Clostridia|Clostridiales|Lachnospiraceae
4396655	#N/A	#N/A	#N/A	#N/A	#N/A	#N/A	#N/A	#N/A	#N/A	0	0	0	0	0	0	0	0	0	0	0	0	0	0	0	0	1	0	0	0	0	0	0	0	Bacteria|Firmicutes|Clostridia|Clostridiales
4396656	#N/A	#N/A	#N/A	#N/A	#N/A	#N/A	#N/A	#N/A	#N/A	0	1	0	4	0	0	2	1	0	0	0	0	0	0	1	0	3	0	0	0	0	0	0	0	Bacteria|Firmicutes|Clostridia|Clostridiales|Clostridiaceae
4312512	#N/A	#N/A	#N/A	#N/A	#N/A	#N/A	#N/A	#N/A	#N/A	0	0	0	0	0	0	0	0	0	0	0	0	0	0	0	0	1	0	0	0	0	0	0	0	Bacteria|Firmicutes|Clostridia|Clostridiales|Peptococcaceae|Desulfotomaculum
323061	#N/A	#N/A	#N/A	#N/A	#N/A	#N/A	10	-1.24374	0	0	0	0	0	1	0	0	1	0	0	0	0	0	0	0	1	0	0	1	2	1	7	0	3	Bacteria|Firmicutes|Clostridia|Clostridiales|Ruminococcaceae
270303	#N/A	#N/A	#N/A	23	-0.267261	0	12	-1.0988	0	93	308	572	215	118	243	62	238	377	192	259	158	128	158	359	325	440	643	433	111	142	59	820	162	Bacteria|Firmicutes|Clostridia|Clostridiales|Ruminococcaceae|Oscillospira
344906	#N/A	#N/A	#N/A	#N/A	#N/A	#N/A	#N/A	#N/A	#N/A	0	1	0	1	0	0	0	0	0	0	0	0	0	0	0	0	0	0	0	0	0	0	0	0	Bacteria|Firmicutes|Clostridia|Clostridiales|Ruminococcaceae
537664	#N/A	#N/A	#N/A	#N/A	#N/A	#N/A	#N/A	#N/A	#N/A	0	0	0	0	0	0	0	0	0	0	0	0	0	1	0	0	0	0	0	0	0	0	0	0	Bacteria|Proteobacteria|Alphaproteobacteria|Rhizobiales
537661	#N/A	#N/A	#N/A	#N/A	#N/A	#N/A	#N/A	#N/A	#N/A	0	0	0	1	1	0	0	0	0	2	0	0	0	0	0	0	0	0	0	1	0	0	0	1	Bacteria|Firmicutes|Clostridia|Clostridiales|Lachnospiraceae
311961	1	-0.836622	0	#N/A	#N/A	#N/A	#N/A	#N/A	#N/A	0	56	38	2	22	7	44	9	1	3	49	8	3	3	34	0	4	6	14	0	4	68	30	13	Bacteria|Firmicutes|Clostridia|Clostridiales|Ruminococcaceae|Anaerotruncus
3563235	11	0	0	6	0.974679	0	#N/A	#N/A	#N/A	7	21	20	18	10	16	16	19	7	24	0	41	43	18	14	14	16	15	0	2	6	8	23	3	Bacteria|Bacteroidetes|Bacteroidia|Bacteroidales|Bacteroidaceae|Bacteroides
4340358	10	-0.781736	0	#N/A	#N/A	#N/A	#N/A	#N/A	#N/A	2	1	0	1	0	1	2	0	0	0	0	1	1	0	1	1	0	1	0	0	0	0	0	1	Bacteria|Bacteroidetes|Bacteroidia|Bacteroidales|Bacteroidaceae|Bacteroides
3150250	#N/A	#N/A	#N/A	#N/A	#N/A	#N/A	#N/A	#N/A	#N/A	0	0	0	0	0	0	0	0	0	0	0	0	0	0	0	0	0	0	0	0	0	1	0	0	Bacteria|Firmicutes|Clostridia|Clostridiales|Lachnospiraceae
379505	#N/A	#N/A	#N/A	#N/A	#N/A	#N/A	#N/A	#N/A	#N/A	0	0	0	0	0	0	0	0	0	4	0	2	0	0	0	0	0	0	1	0	1	0	2	0	Bacteria|Bacteroidetes|Bacteroidia|Bacteroidales|S24-7
199268	#N/A	#N/A	#N/A	#N/A	#N/A	#N/A	#N/A	#N/A	#N/A	0	0	0	0	0	1	0	0	0	0	0	0	0	0	0	0	1	0	1	0	0	0	0	0	Bacteria|Firmicutes|Clostridia|Clostridiales|Clostridiaceae
418334	2	-0.44643	0	#N/A	#N/A	#N/A	#N/A	#N/A	#N/A	0	2	0	0	1	71	0	53	0	0	0	29	56	0	0	0	0	85	0	0	0	1	0	0	Bacteria|Firmicutes|Clostridia|Clostridiales
837859	#N/A	#N/A	#N/A	#N/A	#N/A	#N/A	#N/A	#N/A	#N/A	0	0	0	0	0	0	0	0	0	0	0	0	0	0	0	0	0	0	0	0	0	0	2	0	Bacteria|Firmicutes|Clostridia|Clostridiales|Ruminococcaceae
363887	#N/A	#N/A	#N/A	#N/A	#N/A	#N/A	#N/A	#N/A	#N/A	0	0	0	0	0	0	0	0	0	0	0	0	0	0	0	0	0	0	1	1	0	0	0	0	Bacteria|Bacteroidetes|Bacteroidia|Bacteroidales|Bacteroidaceae|Bacteroides
265706	#N/A	#N/A	#N/A	#N/A	#N/A	#N/A	#N/A	#N/A	#N/A	1	0	0	0	0	0	0	0	1	0	0	0	0	0	0	0	0	0	0	0	0	0	0	2	Bacteria|Firmicutes|Clostridia|Clostridiales
363731	#N/A	#N/A	#N/A	#N/A	#N/A	#N/A	#N/A	#N/A	#N/A	0	77	0	0	5	1	0	0	0	0	104	0	3	84	0	0	0	0	2	0	0	48	93	0	Bacteria|Verrucomicrobia|Verrucomicrobiae|Verrucomicrobiales|Verrucomicrobiaceae|Akkermansia|muciniphila
586968	#N/A	#N/A	#N/A	5	-1.02598	0	#N/A	#N/A	#N/A	0	0	0	0	0	0	2	0	0	0	0	1	1	2	0	1	0	1	0	0	0	1	0	0	Bacteria|Firmicutes|Bacilli|Lactobacillales|Lactobacillaceae|Lactobacillus
4366391	#N/A	#N/A	#N/A	#N/A	#N/A	#N/A	#N/A	#N/A	#N/A	0	0	0	0	0	1	0	0	0	1	0	1	0	0	0	1	0	0	0	0	1	1	0	0	Bacteria|Bacteroidetes|Bacteroidia|Bacteroidales|Bacteroidaceae|Bacteroides
195189	#N/A	#N/A	#N/A	#N/A	#N/A	#N/A	#N/A	#N/A	#N/A	0	0	1	0	1	0	0	0	0	0	0	0	0	0	0	0	2	0	0	1	0	0	0	0	Bacteria|Firmicutes|Clostridia|Clostridiales|Lachnospiraceae|Coprococcus
269359	#N/A	#N/A	#N/A	#N/A	#N/A	#N/A	#N/A	#N/A	#N/A	0	1	0	0	0	0	0	0	0	0	0	0	0	0	0	0	0	0	0	0	0	0	0	0	Bacteria|Firmicutes|Clostridia|Clostridiales
268775	#N/A	#N/A	#N/A	#N/A	#N/A	#N/A	#N/A	#N/A	#N/A	0	1	0	0	0	2	0	0	0	2	0	0	0	0	0	2	0	0	0	0	0	0	0	0	Bacteria|Firmicutes|Clostridia|Clostridiales
390497	#N/A	#N/A	#N/A	#N/A	#N/A	#N/A	#N/A	#N/A	#N/A	0	0	0	0	0	0	0	0	0	0	4	0	0	0	0	0	0	0	0	0	0	3	0	0	Bacteria|Firmicutes|Clostridia|Clostridiales|Ruminococcaceae|Oscillospira
188887	#N/A	#N/A	#N/A	8	-1.35068	0	#N/A	#N/A	#N/A	2	1	2	3	3	6	7	1	1	3	0	3	6	3	4	4	1	1	0	0	0	0	8	0	Bacteria|Bacteroidetes|Bacteroidia|Bacteroidales|Bacteroidaceae|Bacteroides
341448	#N/A	#N/A	#N/A	#N/A	#N/A	#N/A	#N/A	#N/A	#N/A	0	0	0	0	0	0	0	0	1	0	0	0	0	0	0	0	0	0	0	0	0	0	0	0	Bacteria|Bacteroidetes|Bacteroidia|Bacteroidales|S24-7
535375	13	0	0	#N/A	#N/A	#N/A	#N/A	#N/A	#N/A	1	1	1	2	1	0	0	1	1	1	0	1	1	1	1	1	0	3	0	0	0	0	0	2	Bacteria|Bacteroidetes|Bacteroidia|Bacteroidales|Bacteroidaceae|Bacteroides|ovatus
198119	#N/A	#N/A	#N/A	#N/A	#N/A	#N/A	#N/A	#N/A	#N/A	0	0	0	0	0	0	0	0	0	0	2	0	0	0	0	0	0	0	0	0	0	0	0	1	Bacteria|Firmicutes|Clostridia|Clostridiales
274958	#N/A	#N/A	#N/A	#N/A	#N/A	#N/A	#N/A	#N/A	#N/A	0	0	0	1	0	0	1	1	0	2	0	1	1	0	0	0	0	0	0	0	0	1	1	0	Bacteria|Firmicutes|Clostridia|Clostridiales
331720	4	-0.0980581	0	#N/A	#N/A	#N/A	5	0.0723954	0.375	103	33	1	32	27	50	10	66	65	89	123	255	120	0	34	41	410	122	285	288	360	51	1	64	Bacteria|Bacteroidetes|Bacteroidia|Bacteroidales|S24-7
3319380	#N/A	#N/A	#N/A	#N/A	#N/A	#N/A	#N/A	#N/A	#N/A	0	0	0	0	0	0	0	0	0	0	1	0	0	0	0	0	0	0	0	0	0	0	0	0	Bacteria|Actinobacteria|Actinobacteria|Actinomycetales|Nocardioidaceae
4448436	#N/A	#N/A	#N/A	#N/A	#N/A	#N/A	#N/A	#N/A	#N/A	0	0	0	1	0	0	0	0	0	0	0	0	0	0	0	0	0	0	0	0	0	0	0	0	Bacteria|Firmicutes|Clostridia|Clostridiales|Clostridiaceae
208280	#N/A	#N/A	#N/A	#N/A	#N/A	#N/A	#N/A	#N/A	#N/A	0	1	1	1	0	0	0	0	0	0	0	0	0	0	0	0	0	0	0	0	0	0	0	1	Bacteria|Bacteroidetes|Bacteroidia|Bacteroidales|S24-7
272659	#N/A	#N/A	#N/A	#N/A	#N/A	#N/A	#N/A	#N/A	#N/A	0	0	0	0	0	0	0	0	0	0	0	0	0	1	0	0	0	0	1	0	0	0	0	0	Bacteria|Firmicutes|Clostridia|Clostridiales
268487	5	0.208514	0	24	-1.49691	0	20	-0.707107	0	1	4	3	1	0	1	2	2	1	0	0	1	0	1	1	2	1	1	2	1	0	1	5	1	Bacteria|Firmicutes|Clostridia|Clostridiales|Lachnospiraceae|[Ruminococcus]|gnavus
275974	20	-0.308607	0	2	0.48795	0	#N/A	#N/A	#N/A	0	6	6	0	1	3	3	0	0	4	13	1	3	5	1	0	40	0	13	0	1	7	4	7	Bacteria|Actinobacteria|Coriobacteriia|Coriobacteriales|Coriobacteriaceae|Adlercreutzia
211761	#N/A	#N/A	#N/A	#N/A	#N/A	#N/A	#N/A	#N/A	#N/A	0	0	0	0	0	0	0	0	0	0	0	0	0	0	0	0	1	0	1	1	0	0	0	0	Bacteria|Bacteroidetes|Bacteroidia|Bacteroidales|S24-7
4029632	19	0.5	0	11	-0.312348	0	25	0	0	13	23	33	33	15	24	19	17	18	35	0	47	36	24	18	18	24	16	0	4	5	5	39	8	Bacteria|Bacteroidetes|Bacteroidia|Bacteroidales|Bacteroidaceae|Bacteroides
1110312	#N/A	#N/A	#N/A	#N/A	#N/A	#N/A	#N/A	#N/A	#N/A	0	0	0	6	0	0	0	82	0	7	0	3	0	0	0	0	0	0	0	0	0	0	0	0	Bacteria|Firmicutes|Clostridia|Clostridiales
303414	17	-0.561951	0.625	#N/A	#N/A	#N/A	3	1.34304	0	57	64	213	0	3	50	91	278	25	297	446	82	101	100	3	61	60	93	155	46	165	61	102	133	Bacteria|Firmicutes|Clostridia|Clostridiales
264657	#N/A	#N/A	#N/A	17	-0.75	0	#N/A	#N/A	#N/A	0	0	1	0	1	0	0	1	1	2	0	3	1	1	0	0	2	1	0	2	0	0	0	0	Bacteria|Bacteroidetes|Bacteroidia|Bacteroidales|S24-7
176925	#N/A	#N/A	#N/A	#N/A	#N/A	#N/A	#N/A	#N/A	#N/A	0	7	0	0	0	0	0	0	0	0	0	0	0	0	0	0	0	0	4	0	0	0	0	0	Bacteria|Firmicutes|Clostridia|Clostridiales
269775	#N/A	#N/A	#N/A	#N/A	#N/A	#N/A	#N/A	#N/A	#N/A	0	0	0	0	0	0	0	0	0	0	0	0	0	1	10	0	0	0	0	5	0	0	0	4	Bacteria|Firmicutes|Clostridia|Clostridiales
275159	#N/A	#N/A	#N/A	#N/A	#N/A	#N/A	#N/A	#N/A	#N/A	0	0	0	0	0	0	0	0	0	0	0	0	0	0	0	0	0	0	0	0	0	0	2	0	Bacteria|Firmicutes|Clostridia|Clostridiales|Ruminococcaceae
175215	#N/A	#N/A	#N/A	#N/A	#N/A	#N/A	#N/A	#N/A	#N/A	0	0	0	0	0	0	2	0	0	7	1	0	0	0	0	0	0	0	0	0	0	1	0	0	Bacteria|Firmicutes|Clostridia|Clostridiales
2122024	#N/A	#N/A	#N/A	#N/A	#N/A	#N/A	#N/A	#N/A	#N/A	0	0	1	1	0	1	0	0	0	1	0	0	0	0	0	0	0	0	0	0	0	0	0	0	Bacteria|Firmicutes|Clostridia|Clostridiales
273928	#N/A	#N/A	#N/A	#N/A	#N/A	#N/A	#N/A	#N/A	#N/A	0	0	0	0	0	0	0	0	0	0	0	0	0	0	1	0	0	0	0	0	0	0	1	0	Bacteria|Firmicutes|Clostridia|Clostridiales
258995	#N/A	#N/A	#N/A	#N/A	#N/A	#N/A	#N/A	#N/A	#N/A	0	0	0	0	0	0	0	0	0	0	0	1	1	1	0	0	0	0	0	0	0	0	0	0	Bacteria|Firmicutes|Clostridia|Clostridiales|Ruminococcaceae|Oscillospira
258626	#N/A	#N/A	#N/A	#N/A	#N/A	#N/A	#N/A	#N/A	#N/A	0	0	0	0	0	0	0	0	0	1	0	0	0	0	0	0	0	0	0	0	0	0	0	0	Bacteria|Firmicutes|Clostridia|Clostridiales|Lachnospiraceae
179958	#N/A	#N/A	#N/A	9	-0.592739	0	#N/A	#N/A	#N/A	1	0	0	0	0	0	0	0	0	0	1	1	1	2	0	0	1	0	0	1	0	0	0	0	Bacteria|Bacteroidetes|Bacteroidia|Bacteroidales|S24-7
326940	#N/A	#N/A	#N/A	1	1.30776	0.32	26	0	0	1268	1099	583	441	3222	472	439	2609	11	89	531	432	291	176	16	290	440	898	790	1359	481	2086	164	153	Bacteria|Firmicutes|Clostridia|Clostridiales|Ruminococcaceae
4439489	#N/A	#N/A	#N/A	#N/A	#N/A	#N/A	#N/A	#N/A	#N/A	0	0	0	0	0	1	0	0	0	0	0	0	0	0	0	0	0	0	0	0	0	0	0	0	Bacteria|Firmicutes|Clostridia|Clostridiales|Ruminococcaceae
271692	#N/A	#N/A	#N/A	#N/A	#N/A	#N/A	#N/A	#N/A	#N/A	0	0	0	0	0	0	0	0	0	0	0	0	0	2	0	0	9	0	12	11	0	0	0	0	Bacteria|Firmicutes|Clostridia|Clostridiales
225316	#N/A	#N/A	#N/A	#N/A	#N/A	#N/A	#N/A	#N/A	#N/A	0	1	0	0	0	0	0	0	1	0	0	0	1	0	0	1	0	0	0	0	0	0	1	0	Bacteria|Firmicutes|Clostridia|Clostridiales|Clostridiaceae|Clostridium
268396	#N/A	#N/A	#N/A	#N/A	#N/A	#N/A	#N/A	#N/A	#N/A	0	0	0	0	0	0	0	0	0	0	0	0	0	0	0	0	0	0	0	0	0	1	0	0	Bacteria|Firmicutes|Clostridia|Clostridiales
4435655	#N/A	#N/A	#N/A	#N/A	#N/A	#N/A	#N/A	#N/A	#N/A	0	0	0	0	0	0	0	0	0	0	0	1	0	0	0	0	0	0	0	0	0	0	0	0	Bacteria|Proteobacteria|Alphaproteobacteria|RF32
3176547	#N/A	#N/A	#N/A	#N/A	#N/A	#N/A	#N/A	#N/A	#N/A	0	0	0	0	0	0	2	0	0	0	0	0	0	0	0	0	0	0	0	0	0	0	0	0	Bacteria|Firmicutes|Clostridia|Clostridiales
1105751	#N/A	#N/A	#N/A	#N/A	#N/A	#N/A	#N/A	#N/A	#N/A	0	0	0	0	0	0	0	0	0	0	0	0	0	0	0	0	0	0	1	0	0	1	0	0	Bacteria|Firmicutes|Clostridia|Clostridiales|Lachnospiraceae
263705	#N/A	#N/A	#N/A	5	-1.02598	0	9	0.668817	0.32	180	834	253	168	401	431	171	808	29	531	1173	322	210	361	1	216	442	452	1247	1180	250	528	640	386	Bacteria|Firmicutes|Clostridia|Clostridiales|Peptococcaceae
525474	#N/A	#N/A	#N/A	#N/A	#N/A	#N/A	#N/A	#N/A	#N/A	0	0	0	0	0	0	0	0	0	0	1	0	0	0	0	0	0	0	0	0	0	0	0	0	Bacteria|Firmicutes|Clostridia|Clostridiales|Lachnospiraceae|Roseburia
3028318	4	-0.0980581	0	2	-1.26867	0	#N/A	#N/A	#N/A	22040	1046	14310	21748	760	16298	9208	22169	708	4743	29890	12400	4840	8554	20737	14077	7068	23225	47617	39044	32702	14850	7133	17984	Bacteria|Bacteroidetes|Bacteroidia|Bacteroidales|Rikenellaceae
337572	#N/A	#N/A	#N/A	#N/A	#N/A	#N/A	#N/A	#N/A	#N/A	0	0	0	0	0	2	0	0	0	0	0	0	0	0	0	0	1	0	0	0	0	0	0	0	Bacteria|Firmicutes|Clostridia|Clostridiales
350256	#N/A	#N/A	#N/A	#N/A	#N/A	#N/A	#N/A	#N/A	#N/A	0	0	0	0	0	0	0	0	0	0	0	0	3	0	0	0	0	0	0	0	0	0	0	0	Bacteria|Firmicutes|Clostridia|Clostridiales|Ruminococcaceae|Oscillospira
434339	#N/A	#N/A	#N/A	#N/A	#N/A	#N/A	#N/A	#N/A	#N/A	0	0	0	0	0	0	0	0	0	0	0	0	0	0	0	0	0	0	0	0	0	4	0	0	Bacteria|Firmicutes|Clostridia|Clostridiales
318571	#N/A	#N/A	#N/A	#N/A	#N/A	#N/A	#N/A	#N/A	#N/A	0	0	0	0	0	0	1	0	2	0	0	0	0	0	0	1	0	0	0	1	0	0	0	1	Bacteria|Bacteroidetes|Bacteroidia|Bacteroidales|S24-7
4363614	5	1.87663	0.277778	#N/A	#N/A	#N/A	21	-0.707107	0	7	0	0	5	1	10	0	0	0	0	0	1	0	3	0	3	0	10	12	19	0	0	3	0	Bacteria|Firmicutes|Clostridia|Clostridiales|Ruminococcaceae
4360128	#N/A	#N/A	#N/A	#N/A	#N/A	#N/A	#N/A	#N/A	#N/A	0	0	0	0	0	0	0	0	0	0	0	0	0	0	0	0	0	0	1	0	0	0	0	0	Bacteria|Bacteroidetes|Bacteroidia|Bacteroidales|Bacteroidaceae|Bacteroides
1763286	21	0	0	#N/A	#N/A	#N/A	#N/A	#N/A	#N/A	0	1	0	4	1	0	5	1	0	0	0	0	0	0	0	0	0	0	0	0	0	0	0	0	Bacteria|Firmicutes|Clostridia|Clostridiales|Clostridiaceae
342887	#N/A	#N/A	#N/A	#N/A	#N/A	#N/A	21	-1.17851	0	253	1798	399	83	151	374	386	507	7	88	93	625	89	318	14	41	42	453	945	266	9	119	1801	86	Bacteria|Firmicutes|Clostridia|Clostridiales|Lachnospiraceae|[Ruminococcus]|gnavus
339013	#N/A	#N/A	#N/A	43	0	0	9	0.0891756	0	14741	10884	6760	12926	12650	9052	6873	5220	2386	7528	8944	4513	4730	7443	9805	9750	5219	15316	19534	14430	10720	11229	3514	6515	Bacteria|Bacteroidetes|Bacteroidia|Bacteroidales|Bacteroidaceae|Bacteroides
373909	28	-0.57735	0	0	-1.22474	0	15	1.14018	0	6	445	177	66	265	429	304	480	25	282	678	184	151	0	554	118	276	518	490	374	115	622	227	133	Bacteria|Firmicutes|Clostridia|Clostridiales|Ruminococcaceae|Oscillospira
517722	#N/A	#N/A	#N/A	#N/A	#N/A	#N/A	#N/A	#N/A	#N/A	0	1	0	0	1	0	0	0	0	0	0	0	1	0	0	0	0	0	0	0	0	0	0	0	Bacteria|Bacteroidetes|Bacteroidia|Bacteroidales|S24-7
325419	#N/A	#N/A	#N/A	#N/A	#N/A	#N/A	#N/A	#N/A	#N/A	0	0	0	3	1	0	3	0	0	0	0	0	0	0	1	0	1	0	0	0	0	0	0	0	Bacteria|Firmicutes|Clostridia|Clostridiales|Clostridiaceae
267935	#N/A	#N/A	#N/A	#N/A	#N/A	#N/A	#N/A	#N/A	#N/A	0	0	0	0	0	0	0	0	0	0	0	0	0	0	0	0	0	0	1	0	0	0	0	0	Bacteria|Firmicutes|Clostridia|Clostridiales
205904	42	0	0	6	-1.02598	0	#N/A	#N/A	#N/A	76	131	116	146	42	84	73	75	249	136	0	204	210	171	84	103	145	17	0	11	4	25	134	60	Bacteria|Bacteroidetes|Bacteroidia|Bacteroidales|Bacteroidaceae|Bacteroides
453405	#N/A	#N/A	#N/A	#N/A	#N/A	#N/A	#N/A	#N/A	#N/A	0	0	0	0	1	0	0	3	0	0	0	0	0	0	0	0	0	0	0	0	0	0	0	0	Bacteria|Firmicutes|Clostridia|Clostridiales
330417	6	0.0879316	0	19	-1.5	0	42	0	0	2	3	5	0	15	17	0	0	0	3	386	1	2	0	1	0	3	0	2	14	98	55	0	7	Bacteria|Firmicutes|Clostridia|Clostridiales
263415	25	0	0	#N/A	#N/A	#N/A	#N/A	#N/A	#N/A	3	1	0	0	1	0	1	1	0	0	0	1	3	2	0	0	0	0	2	3	0	1	0	0	Bacteria|Firmicutes|Clostridia|Clostridiales
263144	#N/A	#N/A	#N/A	8	-0.78039	0	9	1.24846	0	0	0	0	0	2	5	0	2	2	0	0	1	1	1	2	5	1	1	1	9	12	2	2	3	Bacteria|Firmicutes|Clostridia|Clostridiales
212201	#N/A	#N/A	#N/A	#N/A	#N/A	#N/A	#N/A	#N/A	#N/A	0	0	1	0	0	0	0	0	0	0	0	0	0	0	0	0	0	0	0	0	0	0	0	0	Bacteria|Bacteroidetes|Bacteroidia|Bacteroidales|S24-7
262944	#N/A	#N/A	#N/A	#N/A	#N/A	#N/A	0	0.796313	0	0	0	0	0	0	1	0	2	0	0	0	0	0	2	3	2	3	2	5	3	0	0	0	0	Bacteria|Firmicutes|Clostridia|Clostridiales|Ruminococcaceae
4418496	#N/A	#N/A	#N/A	#N/A	#N/A	#N/A	#N/A	#N/A	#N/A	0	0	0	0	0	0	0	0	0	0	0	0	0	0	0	0	0	1	0	0	0	0	0	0	Bacteria|Bacteroidetes|Bacteroidia|Bacteroidales|Porphyromonadaceae|Parabacteroides
319196	#N/A	#N/A	#N/A	#N/A	#N/A	#N/A	#N/A	#N/A	#N/A	0	0	0	0	0	0	0	0	0	0	0	0	0	1	0	0	0	0	0	0	0	0	0	0	Bacteria|Firmicutes|Clostridia|Clostridiales|Lachnospiraceae
313130	#N/A	#N/A	#N/A	#N/A	#N/A	#N/A	#N/A	#N/A	#N/A	0	0	0	0	0	0	0	0	0	0	0	0	0	0	0	0	0	0	2	0	0	0	0	0	Bacteria|Bacteroidetes|Bacteroidia|Bacteroidales|S24-7
336710	0	-0.867106	0	22	-1.41421	0	24	0.894427	0	2	0	0	1	1	6	3	3	3	3	0	0	3	3	1	4	5	3	0	1	1	0	3	1	Bacteria|Bacteroidetes|Bacteroidia|Bacteroidales|Bacteroidaceae|Bacteroides
259379	#N/A	#N/A	#N/A	#N/A	#N/A	#N/A	#N/A	#N/A	#N/A	0	0	0	0	2	0	3	0	0	6	0	0	0	0	0	0	0	0	0	0	0	5	1	0	Bacteria|Firmicutes|Clostridia|Clostridiales|Lachnospiraceae|[Ruminococcus]|gnavus
212532	#N/A	#N/A	#N/A	#N/A	#N/A	#N/A	#N/A	#N/A	#N/A	4	0	0	0	0	0	58	0	0	0	0	0	0	0	0	0	0	1	250	161	0	0	0	0	Bacteria|Firmicutes|Clostridia|Clostridiales|Ruminococcaceae
189076	#N/A	#N/A	#N/A	#N/A	#N/A	#N/A	#N/A	#N/A	#N/A	3	0	0	0	0	0	2	0	0	0	0	0	0	0	0	0	0	0	0	0	0	0	1	0	Bacteria|Proteobacteria|Betaproteobacteria|Burkholderiales|Alcaligenaceae|Sutterella
267739	#N/A	#N/A	#N/A	#N/A	#N/A	#N/A	#N/A	#N/A	#N/A	0	0	0	0	0	0	0	0	1	0	0	0	0	0	0	0	3	0	0	0	0	0	0	0	Bacteria|Firmicutes|Clostridia|Clostridiales|Ruminococcaceae
263899	#N/A	#N/A	#N/A	#N/A	#N/A	#N/A	#N/A	#N/A	#N/A	0	1	0	0	0	0	0	0	0	0	0	0	0	0	0	0	0	0	0	0	0	0	0	0	Bacteria|Firmicutes|Clostridia|Clostridiales
273741	1	-0.836622	0	4	-1.03693	0	34	0	0	30	261	277	11	52	24	69	57	2	216	284	28	77	28	9	16	59	86	58	38	8	166	227	119	Bacteria|Firmicutes|Clostridia|Clostridiales|Lachnospiraceae
272938	#N/A	#N/A	#N/A	#N/A	#N/A	#N/A	#N/A	#N/A	#N/A	0	0	0	0	0	0	0	0	1	0	0	0	0	0	0	0	0	0	0	0	0	0	0	0	Bacteria|Firmicutes|Erysipelotrichi|Erysipelotrichales|Erysipelotrichaceae|Allobaculum
184329	#N/A	#N/A	#N/A	#N/A	#N/A	#N/A	#N/A	#N/A	#N/A	0	0	0	0	0	0	0	1	0	1	0	0	0	0	0	0	0	0	0	0	0	0	0	0	Bacteria|Bacteroidetes|Bacteroidia|Bacteroidales|S24-7
276158	#N/A	#N/A	#N/A	#N/A	#N/A	#N/A	10	-0.302532	0	0	0	0	0	2	2	1	0	0	4	1	1	0	0	0	0	13	2	5	0	0	0	11	0	Bacteria|Firmicutes|Clostridia|Clostridiales|Lachnospiraceae
759751	#N/A	#N/A	#N/A	#N/A	#N/A	#N/A	#N/A	#N/A	#N/A	2	0	0	0	0	1	0	1	0	0	0	0	0	1	0	0	0	0	0	0	0	0	0	0	Bacteria|Firmicutes|Clostridia|Clostridiales|Lachnospiraceae
299807	#N/A	#N/A	#N/A	#N/A	#N/A	#N/A	#N/A	#N/A	#N/A	0	0	0	0	0	0	0	0	0	0	1	0	0	126	0	0	0	0	0	0	0	0	0	0	Bacteria|Firmicutes|Clostridia|Clostridiales
279659	2	0.0976565	0	#N/A	#N/A	#N/A	#N/A	#N/A	#N/A	0	1	0	1	2	1	0	1	0	0	1	0	0	0	1	0	0	0	0	0	0	0	0	1	Bacteria|Firmicutes|Clostridia|Clostridiales|Ruminococcaceae|Ruminococcus
276151	12	-1.15204	0	9	0.60992	0	5	-0.434372	0	2	4	2	1	0	1	0	3	0	10	4	3	3	5	1	1	0	2	6	3	0	2	3	1	Bacteria|Actinobacteria|Coriobacteriia|Coriobacteriales|Coriobacteriaceae|Adlercreutzia
259012	#N/A	#N/A	#N/A	#N/A	#N/A	#N/A	#N/A	#N/A	#N/A	1	0	0	0	0	0	1	0	1	0	0	0	0	1	0	0	2	0	2	0	0	0	0	0	Bacteria|Bacteroidetes|Bacteroidia|Bacteroidales|S24-7
194909	2	2.81809	0.197531	#N/A	#N/A	#N/A	25	0	0	8	5	4	8	6	7	10	6	1	4	0	15	11	5	7	4	6	7	0	2	2	1	11	2	Bacteria|Bacteroidetes|Bacteroidia|Bacteroidales|Bacteroidaceae|Bacteroides
542417	#N/A	#N/A	#N/A	#N/A	#N/A	#N/A	#N/A	#N/A	#N/A	0	0	0	0	0	0	0	0	0	0	0	0	0	1	0	0	0	0	0	0	0	0	0	0	Bacteria|Firmicutes|Clostridia|Clostridiales
4361727	0	1.42336	0.277778	6	0.974679	0	#N/A	#N/A	#N/A	22	37	24	40	20	23	23	18	15	42	0	68	63	35	29	23	48	20	0	11	4	7	41	6	Bacteria|Bacteroidetes|Bacteroidia|Bacteroidales|Bacteroidaceae|Bacteroides
189279	#N/A	#N/A	#N/A	#N/A	#N/A	#N/A	#N/A	#N/A	#N/A	0	0	0	0	0	0	0	0	1	0	1	0	0	0	0	0	0	0	0	0	0	0	0	0	Bacteria|Firmicutes|Clostridia|Clostridiales|Clostridiaceae
521370	#N/A	#N/A	#N/A	#N/A	#N/A	#N/A	#N/A	#N/A	#N/A	0	0	0	0	0	0	0	0	0	0	0	0	0	0	0	0	2	0	0	0	0	0	0	0	Bacteria|Firmicutes|Bacilli|Lactobacillales|Aerococcaceae|Facklamia
318370	51	0	0	0	1.49691	0	3	-0.993848	0	0	13	33	1	53	1	67	7	0	16	67	2	0	0	49	0	0	6	79	1	20	6	0	35	Bacteria|Firmicutes|Clostridia|Clostridiales|Ruminococcaceae
194906	#N/A	#N/A	#N/A	#N/A	#N/A	#N/A	#N/A	#N/A	#N/A	0	0	0	0	1	0	0	0	0	1	1	0	0	0	0	0	0	0	0	0	0	0	0	0	Bacteria|Firmicutes|Clostridia|Clostridiales
273631	#N/A	#N/A	#N/A	#N/A	#N/A	#N/A	#N/A	#N/A	#N/A	0	0	0	0	0	0	0	0	0	0	0	0	0	0	0	0	0	0	0	1	0	0	0	0	Bacteria|Firmicutes|Clostridia|Clostridiales
1510067	#N/A	#N/A	#N/A	#N/A	#N/A	#N/A	#N/A	#N/A	#N/A	0	0	0	6	0	0	0	0	0	0	0	0	0	0	0	0	0	0	43	0	0	0	0	0	Bacteria|Firmicutes|Clostridia|Clostridiales
189681	#N/A	#N/A	#N/A	#N/A	#N/A	#N/A	#N/A	#N/A	#N/A	0	0	0	0	0	0	0	0	0	2	0	0	0	0	0	0	0	0	0	0	0	0	0	0	Bacteria|Firmicutes|Bacilli|Lactobacillales|Lactobacillaceae|Lactobacillus
287691	#N/A	#N/A	#N/A	#N/A	#N/A	#N/A	11	0.533333	0	0	1	1	0	0	1	0	0	0	0	0	1	0	0	0	0	1	2	0	1	0	1	0	0	Bacteria|Firmicutes|Clostridia|Clostridiales|Clostridiaceae
577170	43	0	0	#N/A	#N/A	#N/A	29	0	0	145	225	241	307	105	224	167	170	156	361	0	463	525	303	164	220	211	137	0	58	33	26	280	94	Bacteria|Bacteroidetes|Bacteroidia|Bacteroidales|Bacteroidaceae|Bacteroides
344329	1	2.77687	0	4	-1.03693	0	0	0.462375	0	307	2385	974	696	3779	1876	1168	2626	58	1540	4014	649	1394	2926	1853	1187	1728	1564	5599	5674	4049	654	1480	1904	Bacteria|Firmicutes|Clostridia|Clostridiales|Ruminococcaceae
273100	#N/A	#N/A	#N/A	#N/A	#N/A	#N/A	#N/A	#N/A	#N/A	0	0	0	0	0	0	0	0	0	0	0	0	0	0	0	0	0	0	0	1	0	0	0	0	Bacteria|Firmicutes|Clostridia|Clostridiales
179427	#N/A	#N/A	#N/A	#N/A	#N/A	#N/A	#N/A	#N/A	#N/A	0	0	1	0	0	0	0	0	0	0	0	0	0	0	0	0	0	0	0	0	0	0	0	0	Bacteria|Bacteroidetes|Bacteroidia|Bacteroidales|S24-7
306545	#N/A	#N/A	#N/A	#N/A	#N/A	#N/A	#N/A	#N/A	#N/A	0	0	0	0	0	0	0	0	0	0	0	0	0	0	0	0	0	0	0	1	0	0	0	0	Bacteria|Firmicutes|Clostridia|Clostridiales|Clostridiaceae
228785	#N/A	#N/A	#N/A	2	0.48795	0.493827	21	0.235702	0	138	57	27	38	0	91	50	0	0	83	51	47	43	56	66	40	0	92	164	84	0	26	37	30	Bacteria|Firmicutes|Clostridia|Clostridiales|Dehalobacteriaceae|Dehalobacterium
262537	#N/A	#N/A	#N/A	#N/A	#N/A	#N/A	#N/A	#N/A	#N/A	0	0	0	0	0	0	0	0	0	0	0	0	0	1	0	0	0	0	0	0	1	1	0	0	Bacteria|Firmicutes|Clostridia|Clostridiales|Lachnospiraceae|[Ruminococcus]|gnavus
263362	#N/A	#N/A	#N/A	#N/A	#N/A	#N/A	#N/A	#N/A	#N/A	1	0	0	0	0	0	0	0	0	0	0	0	0	0	0	0	0	0	0	0	0	0	0	0	Bacteria|Firmicutes|Clostridia|Clostridiales|Lachnospiraceae|[Ruminococcus]|gnavus
276425	41	0	0	0	-0.544331	0	9	0.0891756	0	2	0	0	1	2	0	5	2	5	0	0	1	1	4	0	4	6	1	8	0	0	2	0	1	Bacteria|Firmicutes|Erysipelotrichi|Erysipelotrichales|Erysipelotrichaceae|Allobaculum
988314	#N/A	#N/A	#N/A	#N/A	#N/A	#N/A	#N/A	#N/A	#N/A	0	0	0	1	0	0	0	0	0	0	0	0	0	0	0	0	0	0	0	0	0	0	0	0	Bacteria|Proteobacteria|Gammaproteobacteria|Pseudomonadales|Moraxellaceae|Acinetobacter|johnsonii
259625	#N/A	#N/A	#N/A	#N/A	#N/A	#N/A	2	0.609117	0.32	0	0	0	0	0	0	0	0	0	0	0	0	1	2	0	0	1	0	3	1	1	0	0	0	Bacteria|Bacteroidetes|Bacteroidia|Bacteroidales|S24-7
261016	2	-0.44643	0	34	0	0	3	-0.214886	0	3	8	3	2	0	9	1	6	5	9	31	6	12	7	12	20	28	12	8	12	6	6	19	16	Bacteria|Firmicutes|Clostridia|Clostridiales|Lachnospiraceae|Blautia
198930	#N/A	#N/A	#N/A	#N/A	#N/A	#N/A	#N/A	#N/A	#N/A	0	0	0	0	0	0	0	0	0	0	0	0	0	0	0	0	0	0	0	0	0	1	0	0	Bacteria|Firmicutes|Clostridia|Clostridiales|Lachnospiraceae
337004	#N/A	#N/A	#N/A	#N/A	#N/A	#N/A	#N/A	#N/A	#N/A	0	0	0	0	0	0	0	0	0	4	0	2	0	0	0	0	0	0	0	0	0	0	3	0	Bacteria|Bacteroidetes|Bacteroidia|Bacteroidales|S24-7
2167415	#N/A	#N/A	#N/A	#N/A	#N/A	#N/A	#N/A	#N/A	#N/A	0	0	0	0	2	0	0	0	0	0	0	0	0	0	0	0	0	0	0	0	0	0	0	0	Bacteria|Firmicutes|Clostridia|Clostridiales|Clostridiaceae
262766	7	-0.250982	0	28	0	0	3	-0.214886	0	1	17	1	1	2	1	2	10	1	6	9	0	0	0	7	5	3	8	0	1	0	0	23	5	Bacteria|Firmicutes|Clostridia|Clostridiales|Lachnospiraceae
277208	5	-0.625543	0.625	6	-0.359092	0.444444	10	0.168073	0.32	16	14	17	3	5	6	16	19	0	24	0	12	6	2	0	5	12	12	3	10	2	10	9	1	Bacteria|Firmicutes|Clostridia|Clostridiales
277200	#N/A	#N/A	#N/A	#N/A	#N/A	#N/A	#N/A	#N/A	#N/A	0	0	0	0	0	0	0	0	0	0	1	0	0	0	0	0	0	0	0	0	0	0	0	0	Bacteria|Firmicutes|Clostridia|Clostridiales|Lachnospiraceae
277202	#N/A	#N/A	#N/A	1	-1.01055	0	17	-0.361158	0.444444	26	3	6	6	0	82	5	12	0	0	7	29	42	9	51	2	12	41	132	112	43	0	18	0	Bacteria|Firmicutes|Clostridia|Clostridiales
277204	#N/A	#N/A	#N/A	1	-1.01055	0	#N/A	#N/A	#N/A	7	24	18	12	18	28	15	29	2	14	22	9	9	11	25	27	16	27	66	32	28	31	26	44	Bacteria|Firmicutes|Clostridia|Clostridiales|Ruminococcaceae|Oscillospira
4364243	#N/A	#N/A	#N/A	#N/A	#N/A	#N/A	#N/A	#N/A	#N/A	0	0	0	0	0	0	0	1	0	0	0	0	0	0	0	0	0	0	0	0	0	120	0	0	Bacteria|Firmicutes|Clostridia|Clostridiales|Lachnospiraceae
277066	22	1.43208	0	#N/A	#N/A	#N/A	2	-0.0692178	0	2	4	0	0	0	0	1	2	0	0	0	4	0	0	0	3	3	5	0	0	0	2	0	1	Bacteria|Firmicutes|Erysipelotrichi|Erysipelotrichales|Erysipelotrichaceae|Allobaculum
320141	#N/A	#N/A	#N/A	#N/A	#N/A	#N/A	22	-0.420084	0	0	1	0	0	0	0	0	1	0	0	0	0	0	0	0	0	0	1	0	1	0	3	2	0	Bacteria|Firmicutes|Clostridia|Clostridiales
4426298	#N/A	#N/A	#N/A	8	2.64132	0	4	-0.378517	0	1	0	0	1	1	3	0	1	2	0	0	1	1	1	1	10	8	0	5	4	0	5	1	1	Bacteria|Actinobacteria|Actinobacteria|Bifidobacteriales|Bifidobacteriaceae|Bifidobacterium|animalis
149833	#N/A	#N/A	#N/A	#N/A	#N/A	#N/A	#N/A	#N/A	#N/A	0	0	0	0	0	0	0	0	0	0	0	0	1	0	0	1	0	0	0	0	0	0	0	0	Bacteria|Proteobacteria|Alphaproteobacteria|RF32
428632	33	0	0	#N/A	#N/A	#N/A	#N/A	#N/A	#N/A	2	4	6	9	3	0	0	0	0	1	3	1	0	0	0	0	0	0	0	0	0	0	0	0	Bacteria|Firmicutes|Clostridia|Clostridiales|Ruminococcaceae|Ruminococcus|flavefaciens
922761	#N/A	#N/A	#N/A	#N/A	#N/A	#N/A	#N/A	#N/A	#N/A	0	0	0	0	0	0	0	0	0	0	0	25	1	0	1	1	122	0	0	0	0	0	0	0	Bacteria|Proteobacteria|Gammaproteobacteria|Enterobacteriales|Enterobacteriaceae|Erwinia
277593	#N/A	#N/A	#N/A	#N/A	#N/A	#N/A	#N/A	#N/A	#N/A	0	0	0	0	0	0	0	0	0	0	0	0	0	1	0	0	0	0	0	0	0	0	0	0	Bacteria|Firmicutes|Clostridia|Clostridiales|Lachnospiraceae
550727	#N/A	#N/A	#N/A	#N/A	#N/A	#N/A	#N/A	#N/A	#N/A	0	0	0	0	0	0	0	0	0	1	0	0	0	0	0	0	0	0	0	0	0	0	0	0	Bacteria|Firmicutes|Clostridia|Clostridiales|Lachnospiraceae|Blautia|producta
345466	23	-0.496292	0	21	-1.87639	0	8	-1.22474	0	0	1	11	4	4	7	0	7	0	15	1	10	17	2	5	9	0	3	12	0	4	8	10	0	Bacteria|Firmicutes|Clostridia|Clostridiales
316321	#N/A	#N/A	#N/A	#N/A	#N/A	#N/A	#N/A	#N/A	#N/A	0	0	0	0	0	0	0	0	0	0	0	0	0	0	0	0	0	0	1	0	0	0	0	0	Bacteria|Firmicutes|Bacilli|Lactobacillales|Streptococcaceae|Lactococcus
766113	#N/A	#N/A	#N/A	#N/A	#N/A	#N/A	#N/A	#N/A	#N/A	0	1	1	0	1	0	0	0	0	0	1	0	0	0	0	1	0	0	1	0	0	0	0	0	Bacteria|Firmicutes|Clostridia|Clostridiales|Ruminococcaceae
320070	#N/A	#N/A	#N/A	33	0	0	#N/A	#N/A	#N/A	0	0	0	0	0	26	0	0	0	0	0	2	0	11	3	6	0	71	36	101	0	0	0	0	Bacteria|Firmicutes|Clostridia|Clostridiales|Ruminococcaceae|Ruminococcus
233817	#N/A	#N/A	#N/A	#N/A	#N/A	#N/A	#N/A	#N/A	#N/A	0	0	1	0	0	0	0	0	0	0	0	0	0	1	0	0	1	0	0	0	0	0	0	0	Bacteria|Firmicutes|Clostridia|Clostridiales
277442	31	0	0	#N/A	#N/A	#N/A	11	0.533333	0	1	1	2	0	0	0	0	4	0	0	1	0	0	0	0	1	1	2	0	1	0	3	0	0	Bacteria|Firmicutes|Clostridia|Clostridiales
4430497	#N/A	#N/A	#N/A	#N/A	#N/A	#N/A	#N/A	#N/A	#N/A	1	1	0	0	0	0	0	0	0	0	0	0	1	1	0	0	0	0	0	0	0	0	0	0	Bacteria|Firmicutes|Clostridia|Clostridiales|Lachnospiraceae
573110	#N/A	#N/A	#N/A	#N/A	#N/A	#N/A	#N/A	#N/A	#N/A	0	1	0	0	0	0	0	0	0	3	0	0	0	0	0	0	0	0	0	0	0	0	0	0	Bacteria|Firmicutes|Clostridia|Clostridiales|Lachnospiraceae
4430498	#N/A	#N/A	#N/A	#N/A	#N/A	#N/A	#N/A	#N/A	#N/A	0	0	0	0	0	0	0	0	0	0	1	0	0	0	0	0	0	0	0	0	0	0	0	0	Bacteria|Firmicutes|Clostridia|Clostridiales|Ruminococcaceae|Oscillospira
879327	#N/A	#N/A	#N/A	#N/A	#N/A	#N/A	#N/A	#N/A	#N/A	0	0	0	0	0	1	1	1	0	0	0	0	0	0	0	0	0	0	1	0	0	0	1	0	Bacteria|Firmicutes|Clostridia|Clostridiales|Lachnospiraceae
807693	#N/A	#N/A	#N/A	#N/A	#N/A	#N/A	#N/A	#N/A	#N/A	0	1	0	0	0	0	0	0	0	0	0	0	0	0	0	0	0	0	0	0	0	0	0	0	Bacteria|Firmicutes|Bacilli|Bacillales|Bacillaceae|Bacillus
614083	#N/A	#N/A	#N/A	#N/A	#N/A	#N/A	#N/A	#N/A	#N/A	0	0	0	0	0	1	0	0	0	0	1	2	0	0	0	0	0	1	1	0	0	0	0	1	Bacteria|Firmicutes|Bacilli|Bacillales|Staphylococcaceae|Staphylococcus
390820	0	-0.294489	0	#N/A	#N/A	#N/A	#N/A	#N/A	#N/A	1	0	0	4	1	1	0	1	0	0	1	0	0	3	0	0	2	0	0	10	0	0	0	0	Bacteria|Firmicutes|Clostridia|Clostridiales
274147	#N/A	#N/A	#N/A	#N/A	#N/A	#N/A	#N/A	#N/A	#N/A	0	0	0	0	0	0	0	0	0	0	0	0	0	0	0	0	0	0	0	0	0	0	0	1	Bacteria|Firmicutes|Clostridia|Clostridiales
318320	#N/A	#N/A	#N/A	#N/A	#N/A	#N/A	2	-0.747553	0	0	0	0	0	0	0	0	0	0	0	0	0	0	0	0	0	0	0	1	0	0	2	1	1	Bacteria|Firmicutes|Bacilli|Lactobacillales|Lactobacillaceae|Lactobacillus
198583	#N/A	#N/A	#N/A	#N/A	#N/A	#N/A	#N/A	#N/A	#N/A	0	2	0	0	0	0	0	0	0	0	1	0	0	0	0	0	0	0	0	0	0	2	0	1	Bacteria|Firmicutes|Clostridia|Clostridiales
422283	#N/A	#N/A	#N/A	#N/A	#N/A	#N/A	23	1	0	42	87	19	42	219	302	98	94	42	57	504	228	45	276	69	29	178	326	195	676	450	40	356	65	Bacteria|Firmicutes|Clostridia|Clostridiales|Ruminococcaceae|Oscillospira
329790	#N/A	#N/A	#N/A	#N/A	#N/A	#N/A	#N/A	#N/A	#N/A	13	21	2	10	51	58	8	33	28	23	36	5	20	50	142	20	49	23	29	50	116	38	28	70	Bacteria|Firmicutes|Clostridia|Clostridiales|Ruminococcaceae|Oscillospira
334575	#N/A	#N/A	#N/A	#N/A	#N/A	#N/A	#N/A	#N/A	#N/A	0	0	0	0	0	0	0	0	0	0	0	0	0	0	0	0	0	0	0	0	0	2	0	0	Bacteria|Firmicutes|Clostridia|Clostridiales
190047	#N/A	#N/A	#N/A	#N/A	#N/A	#N/A	#N/A	#N/A	#N/A	0	0	0	0	1	0	1	0	0	0	0	0	1	0	0	0	0	0	0	0	0	0	0	0	Bacteria|Firmicutes|Clostridia|Clostridiales
199422	#N/A	#N/A	#N/A	#N/A	#N/A	#N/A	#N/A	#N/A	#N/A	0	0	0	0	0	0	0	0	0	0	0	0	1	0	0	0	0	0	0	0	0	0	0	0	Bacteria|Firmicutes|Clostridia|Clostridiales|Ruminococcaceae|Oscillospira
275819	#N/A	#N/A	#N/A	#N/A	#N/A	#N/A	#N/A	#N/A	#N/A	0	0	0	0	0	0	0	0	0	2	0	0	0	0	0	0	0	0	0	2	0	0	0	0	Bacteria|Firmicutes|Clostridia|Clostridiales
400739	#N/A	#N/A	#N/A	#N/A	#N/A	#N/A	#N/A	#N/A	#N/A	1	0	0	0	0	0	0	0	0	0	0	0	0	0	0	0	0	0	0	0	0	0	0	0	Bacteria|Firmicutes|Clostridia|Clostridiales|Lachnospiraceae|Dorea
271846	#N/A	#N/A	#N/A	#N/A	#N/A	#N/A	#N/A	#N/A	#N/A	0	0	0	1	0	0	0	0	0	0	0	0	0	0	0	0	0	0	0	0	0	0	0	0	Bacteria|Bacteroidetes|Bacteroidia|Bacteroidales|S24-7
342085	#N/A	#N/A	#N/A	#N/A	#N/A	#N/A	#N/A	#N/A	#N/A	0	1	0	0	0	0	0	0	0	0	0	0	0	0	0	0	0	1	0	0	0	0	0	0	Bacteria|Firmicutes|Clostridia|Clostridiales|Lachnospiraceae
377756	#N/A	#N/A	#N/A	#N/A	#N/A	#N/A	#N/A	#N/A	#N/A	0	0	0	0	0	0	0	0	0	0	0	0	0	0	0	0	0	0	4	0	0	0	0	0	Bacteria|Firmicutes|Clostridia|Clostridiales|Ruminococcaceae
349372	#N/A	#N/A	#N/A	2	1.65903	0	0	-1.04034	0	49	82	20	103	45	160	0	415	3	62	291	200	69	282	87	96	154	331	535	458	134	213	55	56	Bacteria|Firmicutes|Clostridia|Clostridiales
179548	#N/A	#N/A	#N/A	#N/A	#N/A	#N/A	#N/A	#N/A	#N/A	0	0	0	0	0	0	0	0	0	0	0	0	0	0	0	0	0	0	1	0	0	0	0	0	Bacteria|Bacteroidetes|Bacteroidia|Bacteroidales|S24-7
887025	#N/A	#N/A	#N/A	#N/A	#N/A	#N/A	#N/A	#N/A	#N/A	0	0	0	0	0	0	0	1	0	0	0	0	0	0	0	0	0	0	0	0	0	0	0	0	Bacteria|Firmicutes|Clostridia|Clostridiales|Ruminococcaceae
4070490	#N/A	#N/A	#N/A	#N/A	#N/A	#N/A	#N/A	#N/A	#N/A	1	0	0	0	0	0	0	0	1	0	0	0	0	0	0	0	3	0	0	0	0	0	0	0	Bacteria|Firmicutes|Clostridia|Clostridiales|Ruminococcaceae
3908643	#N/A	#N/A	#N/A	#N/A	#N/A	#N/A	#N/A	#N/A	#N/A	0	0	0	0	0	0	0	1	0	0	0	0	0	0	0	0	0	0	0	0	0	0	0	0	Bacteria|Proteobacteria|Gammaproteobacteria|Enterobacteriales|Enterobacteriaceae|Klebsiella|oxytoca
352445	5	-1.4596	0	32	0	0	36	0	0	5	7	9	4	3	10	5	9	6	17	18	6	2	5	13	2	16	3	2	3	2	26	20	5	Bacteria|Firmicutes|Clostridia|Clostridiales|Lachnospiraceae|[Ruminococcus]|gnavus
509452	#N/A	#N/A	#N/A	#N/A	#N/A	#N/A	#N/A	#N/A	#N/A	0	0	0	0	2	0	0	0	0	0	0	0	0	0	0	0	1	0	0	0	0	0	0	0	Bacteria|Firmicutes|Bacilli|Lactobacillales|Lactobacillaceae|Lactobacillus
3671383	#N/A	#N/A	#N/A	#N/A	#N/A	#N/A	#N/A	#N/A	#N/A	0	0	0	0	0	0	0	0	0	1	0	0	0	0	0	0	0	0	0	0	0	0	0	0	Bacteria|Bacteroidetes|Bacteroidia|Bacteroidales|Bacteroidaceae|Bacteroides
683621	#N/A	#N/A	#N/A	0	1.49691	0	10	2.05049	0	5	6	0	3	2	10	5	0	5	18	16	21	5	0	12	22	32	25	28	11	0	0	28	9	Bacteria|Firmicutes|Clostridia|Clostridiales|Clostridiaceae
611931	#N/A	#N/A	#N/A	#N/A	#N/A	#N/A	#N/A	#N/A	#N/A	0	0	0	0	0	1	0	0	0	0	0	1	0	0	0	0	0	3	0	0	0	0	2	0	Bacteria|Firmicutes|Bacilli|Lactobacillales|Aerococcaceae|Aerococcus
269362	#N/A	#N/A	#N/A	#N/A	#N/A	#N/A	#N/A	#N/A	#N/A	0	0	0	0	0	0	0	0	0	0	1	0	0	0	1	0	0	0	0	0	0	0	0	0	Bacteria|Firmicutes|Clostridia|Clostridiales|Lachnospiraceae
274965	#N/A	#N/A	#N/A	#N/A	#N/A	#N/A	#N/A	#N/A	#N/A	0	0	0	0	0	0	0	0	0	0	0	0	0	0	1	0	0	0	0	0	0	0	0	0	Bacteria|Firmicutes|Clostridia|Clostridiales|Lachnospiraceae
1986324	#N/A	#N/A	#N/A	#N/A	#N/A	#N/A	#N/A	#N/A	#N/A	0	1	0	0	0	0	0	0	0	0	0	0	0	0	0	0	0	0	0	0	0	0	0	0	Bacteria|Firmicutes|Clostridia|Clostridiales|Clostridiaceae
269161	#N/A	#N/A	#N/A	#N/A	#N/A	#N/A	#N/A	#N/A	#N/A	0	0	0	0	0	0	0	0	0	0	1	0	0	0	0	0	0	2	1	0	0	0	0	0	Bacteria|Firmicutes|Clostridia|Clostridiales|Lachnospiraceae
176868	2	-0.990516	0	#N/A	#N/A	#N/A	3	-0.993848	0	0	3	3	0	2	2	0	0	1	1	0	1	0	1	0	1	2	2	0	0	0	1	3	1	Bacteria|Firmicutes|Clostridia|Clostridiales|Dehalobacteriaceae|Dehalobacterium
327808	9	0.215666	0	#N/A	#N/A	#N/A	49	0	0	18	29	20	6	29	34	14	31	12	5	36	13	2	26	33	13	28	39	15	38	17	29	18	32	Bacteria|Firmicutes|Clostridia|Clostridiales|Ruminococcaceae|Oscillospira
331737	23	-0.496292	0	4	1.38257	0.32	4	0.243332	0	0	2	2	1	4	15	0	1	0	0	0	6	1	10	24	4	2	4	24	25	3	0	5	3	Bacteria|Firmicutes|Clostridia|Clostridiales|Ruminococcaceae
264536	18	-0.403376	0	2	-1.26867	0	#N/A	#N/A	#N/A	2	2	1	1	1	2	1	0	0	0	2	0	1	1	5	4	2	6	2	12	5	2	3	4	Bacteria|Firmicutes|Clostridia|Clostridiales|Lachnospiraceae
189392	#N/A	#N/A	#N/A	#N/A	#N/A	#N/A	#N/A	#N/A	#N/A	1	0	0	0	0	0	0	1	0	0	0	1	0	0	0	0	1	0	0	0	1	0	1	0	Bacteria|Firmicutes|Clostridia|Clostridiales
276305	#N/A	#N/A	#N/A	#N/A	#N/A	#N/A	#N/A	#N/A	#N/A	0	0	0	0	0	0	0	1	0	0	0	0	0	0	10	0	0	0	0	0	0	0	0	0	Bacteria|Firmicutes|Clostridia|Clostridiales
216356	#N/A	#N/A	#N/A	#N/A	#N/A	#N/A	#N/A	#N/A	#N/A	0	0	0	0	1	0	1	1	0	0	0	0	0	0	0	1	0	0	0	0	0	0	0	0	Bacteria|Firmicutes|Clostridia|Clostridiales
4484382	#N/A	#N/A	#N/A	#N/A	#N/A	#N/A	#N/A	#N/A	#N/A	0	0	0	1	0	2	0	2	0	0	0	0	0	0	3	1	0	0	4	2	0	0	0	0	Bacteria|Firmicutes|Clostridia|Clostridiales|Ruminococcaceae|Oscillospira
301498	#N/A	#N/A	#N/A	1	-1.01055	0	#N/A	#N/A	#N/A	0	3	0	0	0	0	0	1	0	1	1	3	1	5	0	0	2	0	4	0	0	1	0	0	Bacteria|Firmicutes|Clostridia|Clostridiales|Lachnospiraceae
543065	#N/A	#N/A	#N/A	#N/A	#N/A	#N/A	#N/A	#N/A	#N/A	0	0	0	1	0	0	0	0	0	0	0	0	0	0	0	0	0	0	0	0	0	0	0	0	Bacteria|Proteobacteria|Alphaproteobacteria|Rhodobacterales|Rhodobacteraceae
265483	#N/A	#N/A	#N/A	#N/A	#N/A	#N/A	16	-0.381385	0	3	1	0	0	0	0	0	0	0	0	3	0	1	0	0	0	5	0	3	3	1	1	2	0	Bacteria|Firmicutes|Clostridia|Clostridiales|Ruminococcaceae|Oscillospira
361108	4	0.931552	0	8	-0.210105	0	3	-0.993848	0	14	30	15	10	19	13	18	10	2	28	58	3	5	8	6	4	11	0	20	39	3	0	19	15	Bacteria|Firmicutes|Clostridia|Clostridiales|Lachnospiraceae
258969	#N/A	#N/A	#N/A	#N/A	#N/A	#N/A	#N/A	#N/A	#N/A	0	0	0	0	0	0	0	0	0	0	0	0	0	0	0	0	0	0	0	0	0	0	0	1	Bacteria|Firmicutes|Clostridia|Clostridiales|Lachnospiraceae|[Ruminococcus]|gnavus
4468234	#N/A	#N/A	#N/A	#N/A	#N/A	#N/A	0	-1.04034	0.64	0	0	0	0	0	2	0	1	0	1	0	0	0	1	1	0	1	0	0	0	0	1	1	1	Bacteria|Bacteroidetes|Bacteroidia|Bacteroidales|Bacteroidaceae|Bacteroides
317633	0	-0.294489	0.444444	#N/A	#N/A	#N/A	52	0	0	5	28	18	0	20	30	19	4	6	27	8	49	7	4	10	2	29	8	6	42	19	18	29	3	Bacteria|Firmicutes|Clostridia|Clostridiales|Ruminococcaceae|Oscillospira
1130824	#N/A	#N/A	#N/A	#N/A	#N/A	#N/A	#N/A	#N/A	#N/A	0	0	0	0	0	0	0	0	0	0	0	0	0	0	0	0	0	0	1	0	0	0	0	0	Bacteria|Firmicutes|Bacilli|Lactobacillales|Streptococcaceae|Lactococcus
269949	#N/A	#N/A	#N/A	#N/A	#N/A	#N/A	27	0	0	0	0	1	0	0	0	0	0	0	0	0	0	0	0	0	0	1	0	2	0	0	1	0	1	Bacteria|Firmicutes|Clostridia|Clostridiales|Lachnospiraceae
335391	#N/A	#N/A	#N/A	#N/A	#N/A	#N/A	#N/A	#N/A	#N/A	0	0	0	0	0	0	24	0	0	0	0	0	0	0	200	17	0	0	35	0	0	0	7	0	Bacteria|Firmicutes|Clostridia|Clostridiales|Ruminococcaceae
447776	#N/A	#N/A	#N/A	#N/A	#N/A	#N/A	#N/A	#N/A	#N/A	1	0	0	1	0	0	0	0	0	0	0	0	0	0	0	0	0	0	0	0	0	0	0	0	Bacteria|Firmicutes|Clostridia|Clostridiales
584137	#N/A	#N/A	#N/A	#N/A	#N/A	#N/A	#N/A	#N/A	#N/A	0	0	0	0	0	0	0	0	0	0	0	0	0	0	0	0	3	0	1	3	0	0	0	0	Bacteria|Firmicutes|Clostridia|Clostridiales|Lachnospiraceae
234443	#N/A	#N/A	#N/A	#N/A	#N/A	#N/A	#N/A	#N/A	#N/A	1	0	0	0	0	0	0	0	0	0	1	0	0	0	0	1	0	1	0	0	0	1	0	0	Bacteria|Bacteroidetes|Bacteroidia|Bacteroidales|Rikenellaceae
423830	#N/A	#N/A	#N/A	#N/A	#N/A	#N/A	#N/A	#N/A	#N/A	0	0	0	1	0	0	0	0	0	0	0	0	0	0	0	0	0	0	0	0	0	0	0	0	Bacteria|Firmicutes|Clostridia|Clostridiales
332608	#N/A	#N/A	#N/A	#N/A	#N/A	#N/A	0	-0.539438	0	6	0	1	129	1	2727	0	358	4	0	0	54	0	1	2	302	470	2001	771	77	0	0	0	2	Bacteria|Firmicutes|Clostridia|Clostridiales|Ruminococcaceae|Oscillospira
335550	#N/A	#N/A	#N/A	#N/A	#N/A	#N/A	#N/A	#N/A	#N/A	0	0	0	0	0	0	0	0	0	0	0	0	0	0	0	0	0	0	0	0	1	0	0	0	Bacteria|Firmicutes|Clostridia|Clostridiales|Ruminococcaceae|Oscillospira
335553	1	1.22823	0.408163	23	-1.60357	0	#N/A	#N/A	#N/A	0	5	4	1	6	1	2	1	0	3	0	4	1	4	0	0	2	0	0	1	0	0	0	0	Bacteria|Firmicutes|Clostridia|Clostridiales
183431	#N/A	#N/A	#N/A	#N/A	#N/A	#N/A	#N/A	#N/A	#N/A	0	3	0	0	1	0	0	0	0	0	0	0	0	0	0	1	0	0	0	0	0	0	0	0	Bacteria|Firmicutes|Clostridia|Clostridiales
339092	22	0.260378	0	30	0	0	#N/A	#N/A	#N/A	193	973	380	41	37	201	283	418	8	30	200	133	50	183	15	55	33	429	750	117	13	78	1663	59	Bacteria|Firmicutes|Clostridia|Clostridiales|Lachnospiraceae|[Ruminococcus]|gnavus
269019	2	-0.990516	0	17	0.5	0	#N/A	#N/A	#N/A	2	1	2	1	2	3	0	4	1	1	5	1	1	1	4	5	0	0	7	2	0	0	0	1	Bacteria|Firmicutes|Clostridia|Clostridiales|Ruminococcaceae|Oscillospira
185338	#N/A	#N/A	#N/A	12	0	0	6	0.729158	0	2	1	0	0	0	0	0	2	0	4	10	1	0	1	2	1	5	1	1	1	2	0	3	1	Bacteria|Firmicutes|Clostridia|Clostridiales|Lachnospiraceae|[Ruminococcus]|gnavus
356590	4	1.96116	0	#N/A	#N/A	#N/A	5	-0.94114	0	1	1	1	0	1	2	1	0	1	2	5	1	0	0	23	1	0	0	655	320	0	1	3	0	Bacteria|Firmicutes|Clostridia|Clostridiales
173218	#N/A	#N/A	#N/A	#N/A	#N/A	#N/A	#N/A	#N/A	#N/A	0	1	0	0	0	0	0	0	0	0	0	0	0	1	5	0	0	0	0	0	0	0	0	0	Bacteria|Firmicutes|Clostridia|Clostridiales
416341	12	0.164577	0	18	-1	0	2	0.609117	0.444444	27	0	0	11	0	79	0	207	98	0	0	68	0	38	4	71	187	108	137	195	49	0	2	1	Bacteria|Firmicutes|Clostridia|Clostridiales|Lachnospiraceae
318563	12	1.74452	0.142012	#N/A	#N/A	#N/A	2	-0.0692178	0.48	4	0	0	1	0	2	0	7	1	0	0	5	0	4	0	3	3	2	6	11	1	0	0	0	Bacteria|Firmicutes|Clostridia|Clostridiales|Lachnospiraceae
465433	2	3.36217	0.416667	2	-1.26867	0	8	0.408248	0	52	45	49	84	133	95	1	121	11	34	66	26	61	48	210	70	25	95	82	0	85	79	91	48	Bacteria|Bacteroidetes|Bacteroidia|Bacteroidales|Rikenellaceae
3195989	#N/A	#N/A	#N/A	#N/A	#N/A	#N/A	#N/A	#N/A	#N/A	0	0	0	0	0	0	0	0	0	0	0	0	0	0	0	0	0	1	0	0	0	0	0	0	Bacteria|Proteobacteria|Alphaproteobacteria|Sphingomonadales|Sphingomonadaceae|Sphingomonas|wittichii
197139	#N/A	#N/A	#N/A	#N/A	#N/A	#N/A	#N/A	#N/A	#N/A	0	0	0	2	1	0	0	1	0	0	0	0	0	0	3	0	0	0	0	0	0	0	0	0	Bacteria|Firmicutes|Clostridia|Clostridiales
330064	#N/A	#N/A	#N/A	#N/A	#N/A	#N/A	#N/A	#N/A	#N/A	0	0	0	0	0	1	0	0	1	0	0	0	0	0	0	1	0	0	1	0	0	0	0	0	Bacteria|Firmicutes|Clostridia|Clostridiales
384555	4	-1.12767	0	1	0.534994	0	2	0.609117	0.5	2822	565	1791	3360	2387	1288	1542	324	161	1075	1151	1486	2323	1739	1741	1788	1748	3982	2166	2727	996	1630	687	1067	Bacteria|Bacteroidetes|Bacteroidia|Bacteroidales|S24-7
275218	#N/A	#N/A	#N/A	#N/A	#N/A	#N/A	1	-1.00626	0.5	573	1439	940	509	978	1003	236	923	14	472	880	307	63	569	1934	261	313	1464	775	863	87	589	464	124	Bacteria|Firmicutes|Clostridia|Clostridiales|Ruminococcaceae
271737	#N/A	#N/A	#N/A	#N/A	#N/A	#N/A	#N/A	#N/A	#N/A	0	1	0	0	0	0	0	0	0	0	0	0	0	0	0	0	0	0	0	0	0	0	0	0	Bacteria|Firmicutes|Clostridia|Clostridiales
2223970	#N/A	#N/A	#N/A	#N/A	#N/A	#N/A	#N/A	#N/A	#N/A	0	1	0	0	0	0	2	1	0	0	0	0	2	0	0	0	1	0	0	0	0	1	0	0	Bacteria|Bacteroidetes|Bacteroidia|Bacteroidales|Bacteroidaceae|Bacteroides
562599	#N/A	#N/A	#N/A	#N/A	#N/A	#N/A	#N/A	#N/A	#N/A	0	0	0	0	0	0	0	0	0	0	0	0	0	0	0	0	0	0	0	0	0	1	0	0	Bacteria|Firmicutes|Clostridia|Clostridiales|Ruminococcaceae|Ruminococcus|flavefaciens
161677	#N/A	#N/A	#N/A	#N/A	#N/A	#N/A	#N/A	#N/A	#N/A	0	0	0	1	0	1	0	0	0	0	0	0	0	0	0	0	0	0	0	0	0	0	2	0	Bacteria|Proteobacteria|Gammaproteobacteria|Pseudomonadales|Moraxellaceae|Acinetobacter|schindleri
574051	#N/A	#N/A	#N/A	#N/A	#N/A	#N/A	#N/A	#N/A	#N/A	0	0	0	0	1	0	2	0	0	0	0	0	0	0	0	0	0	0	0	0	0	0	0	0	Bacteria|Firmicutes|Bacilli|Bacillales|Bacillaceae|Bacillus
263403	2	1.18583	0	#N/A	#N/A	#N/A	5	0.579163	0	1	4	1	3	0	4	0	4	0	1	1	0	0	1	12	4	1	2	8	6	1	3	0	4	Bacteria|Firmicutes|Clostridia|Clostridiales|Ruminococcaceae|Oscillospira
330460	#N/A	#N/A	#N/A	#N/A	#N/A	#N/A	#N/A	#N/A	#N/A	0	0	1	0	0	0	0	0	0	0	0	0	0	0	0	0	0	0	0	0	0	0	0	0	Bacteria|Firmicutes|Clostridia|Clostridiales
301872	#N/A	#N/A	#N/A	#N/A	#N/A	#N/A	#N/A	#N/A	#N/A	0	0	0	0	1	0	1	1	0	1	1	0	0	0	0	0	1	0	0	0	0	1	2	0	Bacteria|Firmicutes|Clostridia|Clostridiales|Lachnospiraceae|[Ruminococcus]|gnavus
336703	#N/A	#N/A	#N/A	#N/A	#N/A	#N/A	#N/A	#N/A	#N/A	0	0	0	0	0	0	0	0	0	0	0	0	0	0	0	0	0	0	0	0	0	0	0	1	Bacteria|Firmicutes|Bacilli|Bacillales|Staphylococcaceae|Jeotgalicoccus|psychrophilus
577568	#N/A	#N/A	#N/A	#N/A	#N/A	#N/A	#N/A	#N/A	#N/A	0	0	0	0	0	0	0	0	0	0	0	0	0	0	0	0	0	0	0	0	0	0	1	0	Bacteria|Verrucomicrobia|Verrucomicrobiae|Verrucomicrobiales|Verrucomicrobiaceae|Akkermansia|muciniphila
356627	#N/A	#N/A	#N/A	#N/A	#N/A	#N/A	#N/A	#N/A	#N/A	0	1	0	0	0	0	0	0	0	0	0	0	0	0	0	0	0	0	0	0	0	0	0	0	Bacteria|Firmicutes|Clostridia|Clostridiales
229958	#N/A	#N/A	#N/A	#N/A	#N/A	#N/A	#N/A	#N/A	#N/A	0	0	0	0	0	0	0	0	0	0	0	9	0	1	2	0	0	0	15	20	0	0	0	0	Bacteria|Firmicutes|Clostridia|Clostridiales|Ruminococcaceae|Oscillospira
4060124	#N/A	#N/A	#N/A	#N/A	#N/A	#N/A	#N/A	#N/A	#N/A	0	0	0	0	0	0	0	0	0	0	0	0	0	0	0	0	0	0	0	0	0	0	0	1	Bacteria|Bacteroidetes|Bacteroidia|Bacteroidales|Bacteroidaceae|Bacteroides
1517779	4	-0.0980581	0	8	-0.78039	0	6	-0.979806	0	914	526	2197	2089	689	2337	2274	2054	74	361	404	1118	1718	684	1191	3484	487	2773	1435	8279	1297	827	741	3391	Bacteria|Bacteroidetes|Bacteroidia|Bacteroidales|Rikenellaceae
1108377	#N/A	#N/A	#N/A	#N/A	#N/A	#N/A	#N/A	#N/A	#N/A	0	0	0	1	0	0	0	0	0	0	0	0	0	0	0	0	0	0	0	0	0	0	0	0	Bacteria|Bacteroidetes|Bacteroidia|Bacteroidales|S24-7
131039	#N/A	#N/A	#N/A	#N/A	#N/A	#N/A	#N/A	#N/A	#N/A	0	0	0	0	0	0	0	0	0	0	1	0	0	0	0	0	0	0	0	0	0	0	0	0	Bacteria|Firmicutes|Clostridia|Clostridiales|Ruminococcaceae|Oscillospira
273776	22	-0.911322	0.444444	#N/A	#N/A	#N/A	51	0	0	2	5	1	0	0	1	3	4	0	0	0	2	0	0	0	0	0	3	7	0	0	0	4	2	Bacteria|Firmicutes|Clostridia|Clostridiales|Lachnospiraceae|[Ruminococcus]|gnavus
3262406	#N/A	#N/A	#N/A	#N/A	#N/A	#N/A	#N/A	#N/A	#N/A	0	0	0	0	1	0	0	0	1	0	0	0	0	0	1	1	0	0	1	0	1	0	0	2	Bacteria|Bacteroidetes|Bacteroidia|Bacteroidales|Bacteroidaceae|Bacteroides
259564	#N/A	#N/A	#N/A	#N/A	#N/A	#N/A	#N/A	#N/A	#N/A	0	0	0	0	0	0	0	0	0	0	0	0	0	0	0	3	0	0	0	0	0	2	0	0	Bacteria|Firmicutes|Erysipelotrichi|Erysipelotrichales|Erysipelotrichaceae|Allobaculum
629361	#N/A	#N/A	#N/A	#N/A	#N/A	#N/A	#N/A	#N/A	#N/A	0	0	0	0	0	0	0	1	0	0	0	0	0	0	0	0	0	0	0	0	0	0	0	0	Bacteria|Firmicutes|Clostridia|Clostridiales
343923	#N/A	#N/A	#N/A	#N/A	#N/A	#N/A	#N/A	#N/A	#N/A	0	0	0	0	0	0	0	0	0	0	0	0	0	0	0	0	0	0	0	0	0	3	0	0	Bacteria|Firmicutes|Clostridia|Clostridiales
4446732	#N/A	#N/A	#N/A	#N/A	#N/A	#N/A	#N/A	#N/A	#N/A	0	1	1	0	0	0	0	0	0	1	0	0	0	0	0	0	0	0	0	0	0	0	0	0	Bacteria|Tenericutes|Mollicutes|RF39
266720	#N/A	#N/A	#N/A	#N/A	#N/A	#N/A	#N/A	#N/A	#N/A	0	0	0	0	0	1	0	0	0	0	0	0	0	0	0	0	0	0	0	0	0	0	0	0	Bacteria|Firmicutes|Clostridia|Clostridiales|Ruminococcaceae
449833	#N/A	#N/A	#N/A	#N/A	#N/A	#N/A	#N/A	#N/A	#N/A	0	0	0	0	0	0	0	0	0	0	0	0	0	0	0	0	0	0	7	0	0	0	0	1	Bacteria|Bacteroidetes|Bacteroidia|Bacteroidales|S24-7
266726	#N/A	#N/A	#N/A	#N/A	#N/A	#N/A	#N/A	#N/A	#N/A	1	0	0	0	0	0	0	30	0	0	0	0	0	0	0	1	0	0	0	0	0	0	1	0	Bacteria|Firmicutes|Clostridia|Clostridiales|Lachnospiraceae|Coprococcus
228556	#N/A	#N/A	#N/A	#N/A	#N/A	#N/A	#N/A	#N/A	#N/A	0	0	0	0	0	0	0	0	0	0	0	0	0	0	0	0	1	0	0	0	0	0	0	0	Bacteria|Proteobacteria|Gammaproteobacteria|Enterobacteriales|Enterobacteriaceae
401384	6	1.43622	0	37	0	0	12	0.0578315	0	3875	5736	4424	1058	5634	3935	3059	6600	366	2153	6865	3810	1606	4484	4458	1454	4223	6012	5095	6459	2128	2748	3778	3527	Bacteria|Firmicutes|Clostridia|Clostridiales|Ruminococcaceae|Oscillospira
337724	#N/A	#N/A	#N/A	9	-0.833271	0	50	0	0	30	8	56	38	50	26	14	10	0	272	1	181	115	239	18	12	60	19	64	63	8	6	17	17	Bacteria|Bacteroidetes|Bacteroidia|Bacteroidales|S24-7
267411	34	0	0	7	0.8125	0	#N/A	#N/A	#N/A	2	0	1	0	1	0	2	1	0	0	0	1	1	5	2	0	0	0	2	1	0	0	0	0	Bacteria|Firmicutes|Clostridia|Clostridiales
1126577	#N/A	#N/A	#N/A	#N/A	#N/A	#N/A	#N/A	#N/A	#N/A	0	0	0	0	0	0	0	0	1	0	0	0	0	0	0	0	1	0	0	0	0	0	0	3	Bacteria|Firmicutes|Clostridia|Clostridiales|Ruminococcaceae
337727	38	0	0	27	0	0	22	0.420084	0.32	24	53	44	12	19	78	44	31	2	19	116	19	10	28	40	17	56	57	63	75	28	45	52	23	Bacteria|Firmicutes|Clostridia|Clostridiales|Ruminococcaceae|Oscillospira
263977	#N/A	#N/A	#N/A	#N/A	#N/A	#N/A	#N/A	#N/A	#N/A	1	0	0	0	0	0	0	0	0	0	0	0	0	0	1	0	0	0	0	0	0	1	0	0	Bacteria|Firmicutes|Clostridia|Clostridiales|Ruminococcaceae
275653	#N/A	#N/A	#N/A	#N/A	#N/A	#N/A	#N/A	#N/A	#N/A	0	0	0	0	0	0	0	0	0	0	0	0	0	0	0	0	0	2	0	0	0	0	0	0	Bacteria|Firmicutes|Clostridia|Clostridiales
188740	#N/A	#N/A	#N/A	#N/A	#N/A	#N/A	#N/A	#N/A	#N/A	0	0	0	0	0	0	0	0	0	0	0	0	0	0	0	0	0	0	0	1	0	0	0	0	Bacteria|Firmicutes|Clostridia|Clostridiales
188741	#N/A	#N/A	#N/A	#N/A	#N/A	#N/A	#N/A	#N/A	#N/A	0	0	0	0	0	0	0	1	0	0	0	0	0	0	3	0	0	0	2	0	0	0	0	0	Bacteria|Firmicutes|Clostridia|Clostridiales|Dehalobacteriaceae|Dehalobacterium
194858	#N/A	#N/A	#N/A	2	0.48795	0	11	0.533333	0	0	0	0	0	0	0	0	0	0	1	2	0	1	1	0	0	1	2	0	1	0	1	0	0	Bacteria|Firmicutes|Clostridia|Clostridiales|Lachnospiraceae|[Ruminococcus]|gnavus
831409	3	2.12548	0	9	-0.833271	0	#N/A	#N/A	#N/A	15	13	16	13	32	2	15	19	1	8	8	8	12	21	6	2	18	20	14	9	26	0	16	5	Bacteria|Firmicutes|Clostridia|Clostridiales
1107493	#N/A	#N/A	#N/A	#N/A	#N/A	#N/A	#N/A	#N/A	#N/A	0	0	1	0	0	0	0	0	0	0	1	0	0	0	0	0	0	0	0	0	0	0	0	0	Bacteria|Firmicutes|Clostridia|Clostridiales
336632	7	0.690201	0	3	-1.10068	0	#N/A	#N/A	#N/A	1	6160	1	0	311	0	2	4	0	1	8329	11	78	5867	0	1	0	33	172	1	0	3714	7766	0	Bacteria|Verrucomicrobia|Verrucomicrobiae|Verrucomicrobiales|Verrucomicrobiaceae|Akkermansia|muciniphila
197825	#N/A	#N/A	#N/A	#N/A	#N/A	#N/A	12	2.37109	0	0	0	0	0	1	0	0	0	0	0	0	0	0	0	0	0	0	0	0	3	0	2	3	1	Bacteria|Firmicutes|Clostridia|Clostridiales
304080	#N/A	#N/A	#N/A	#N/A	#N/A	#N/A	#N/A	#N/A	#N/A	0	0	1	0	0	0	0	0	0	0	0	0	0	2	0	0	0	0	0	0	1	0	0	0	Bacteria|Firmicutes|Clostridia|Clostridiales
273171	#N/A	#N/A	#N/A	#N/A	#N/A	#N/A	#N/A	#N/A	#N/A	0	0	0	0	0	0	0	0	0	0	0	0	0	1	0	0	6	0	13	4	0	0	0	0	Bacteria|Firmicutes|Clostridia|Clostridiales
407963	0	-0.294489	0	9	1.57205	0.272189	10	-1.24374	0	655	7633	3839	1030	4090	2133	3442	1102	42	3259	5819	1134	1311	1466	1293	324	709	2084	916	6459	679	4859	6095	4183	Bacteria|Firmicutes|Clostridia|Clostridiales|Ruminococcaceae|Oscillospira
266091	#N/A	#N/A	#N/A	#N/A	#N/A	#N/A	#N/A	#N/A	#N/A	0	0	0	0	0	0	0	0	0	0	0	0	0	0	0	0	0	1	0	0	0	0	0	0	Bacteria|Firmicutes|Clostridia|Clostridiales
187233	#N/A	#N/A	#N/A	#N/A	#N/A	#N/A	#N/A	#N/A	#N/A	0	0	0	0	2	0	0	0	1	0	0	0	0	0	0	2	0	0	0	1	0	0	0	0	Bacteria|Firmicutes|Bacilli|Lactobacillales|Lactobacillaceae|Lactobacillus
4134150	#N/A	#N/A	#N/A	#N/A	#N/A	#N/A	#N/A	#N/A	#N/A	0	0	0	0	0	0	0	0	0	0	0	0	0	0	0	0	0	0	2	2	0	0	0	0	Bacteria|Firmicutes|Clostridia|Clostridiales
343581	#N/A	#N/A	#N/A	6	0.974679	0	22	0.420084	0.444444	3128	2610	1911	603	3704	1	3836	2931	75	743	1	677	2213	2666	1072	113	1283	1126	5974	3373	57	1786	888	136	Bacteria|Firmicutes|Clostridia|Clostridiales
304532	3	-0.354246	0	3	0.148741	0	22	-1.26025	0.444444	1	4	4	0	11	0	6	4	0	1	0	1	1	0	3	1	5	2	15	7	0	5	2	0	Bacteria|Firmicutes|Clostridia|Clostridiales
290293	#N/A	#N/A	#N/A	#N/A	#N/A	#N/A	#N/A	#N/A	#N/A	0	0	0	0	0	0	0	0	0	0	0	0	0	0	0	0	0	0	0	0	0	1	0	0	Bacteria|Firmicutes|Clostridia|Clostridiales|Lachnospiraceae
276985	#N/A	#N/A	#N/A	4	-1.03693	0	0	-0.873375	0	3	60	11	15	24	11	28	8	1	13	43	5	16	4	7	5	2	16	4	50	8	44	38	60	Bacteria|Firmicutes|Clostridia|Clostridiales|Ruminococcaceae|Oscillospira
1111745	#N/A	#N/A	#N/A	#N/A	#N/A	#N/A	#N/A	#N/A	#N/A	1	1	0	0	0	0	0	0	0	0	0	1	0	0	0	0	0	0	0	0	1	0	0	0	Bacteria|Firmicutes|Clostridia|Clostridiales|Lachnospiraceae
835154	#N/A	#N/A	#N/A	#N/A	#N/A	#N/A	#N/A	#N/A	#N/A	1	0	0	0	0	0	1	0	0	0	0	0	0	0	0	0	0	0	0	0	0	0	0	0	Bacteria|Firmicutes|Clostridia|Clostridiales
696563	#N/A	#N/A	#N/A	#N/A	#N/A	#N/A	#N/A	#N/A	#N/A	0	0	0	0	0	0	0	0	0	28	0	0	0	0	0	0	0	0	0	0	0	0	0	0	Bacteria|Firmicutes|Clostridia|Clostridiales|Lachnospiraceae|Blautia|producta
1074625	#N/A	#N/A	#N/A	#N/A	#N/A	#N/A	#N/A	#N/A	#N/A	0	0	0	0	0	0	0	0	0	0	0	0	0	0	0	0	1	1	0	0	0	0	0	1	Bacteria|Actinobacteria|Actinobacteria|Actinomycetales|Microbacteriaceae
336528	#N/A	#N/A	#N/A	#N/A	#N/A	#N/A	#N/A	#N/A	#N/A	0	0	0	0	0	0	0	0	0	0	0	0	0	0	0	0	0	0	0	0	0	1	0	1	Bacteria|Firmicutes|Clostridia|Clostridiales|Lachnospiraceae
277215	#N/A	#N/A	#N/A	#N/A	#N/A	#N/A	#N/A	#N/A	#N/A	0	0	0	0	0	0	0	0	0	0	0	0	0	0	0	0	0	1	1	0	0	0	0	0	Bacteria|Firmicutes|Clostridia|Clostridiales|Ruminococcaceae
4483391	#N/A	#N/A	#N/A	#N/A	#N/A	#N/A	#N/A	#N/A	#N/A	0	0	0	0	0	0	0	0	0	0	1	0	0	0	0	0	0	0	0	0	0	0	0	0	Bacteria|Firmicutes|Clostridia|Clostridiales|Lachnospiraceae
344108	0	-0.867106	0	5	-0.410391	0	49	0	0	2	2	5	0	0	2	1	2	1	5	12	1	3	1	0	0	2	1	3	1	5	1	3	1	Bacteria|Firmicutes|Clostridia|Clostridiales|Lachnospiraceae
259382	#N/A	#N/A	#N/A	#N/A	#N/A	#N/A	#N/A	#N/A	#N/A	0	0	0	0	0	0	0	0	0	0	0	0	0	0	0	0	0	0	0	0	0	0	0	1	Bacteria|Firmicutes|Clostridia|Clostridiales|Lachnospiraceae
344101	12	-1.15204	0	11	-1.09322	0	48	0	0	6	2548	1688	729	337	200	831	7	382	1724	1885	1173	1166	50	131	36	13	5	703	1013	3283	1958	2105	361	Bacteria|Firmicutes|Clostridia|Clostridiales|Ruminococcaceae
308249	#N/A	#N/A	#N/A	#N/A	#N/A	#N/A	#N/A	#N/A	#N/A	0	0	0	0	2	0	0	0	0	0	0	0	0	0	0	1	0	0	0	0	0	0	0	0	Bacteria|Firmicutes|Bacilli|Lactobacillales|Lactobacillaceae|Lactobacillus
51677	#N/A	#N/A	#N/A	#N/A	#N/A	#N/A	#N/A	#N/A	#N/A	0	1	0	0	0	0	12	0	0	0	0	0	0	0	4	0	1	0	0	0	0	2	0	0	Bacteria|Firmicutes|Clostridia|Clostridiales
335952	23	-1.04221	0	9	0.369388	0	3	0.564076	0	0	3	2	1	9	4	0	2	0	2	5	3	1	2	3	1	1	1	6	3	4	1	1	3	Bacteria|Firmicutes|Clostridia|Clostridiales|Ruminococcaceae
427241	18	2.42025	0	12	2.40535	0	31	0	0	286	181	278	163	179	233	388	110	25	787	467	437	360	315	222	295	315	249	717	604	178	210	269	162	Bacteria|Bacteroidetes|Bacteroidia|Bacteroidales|S24-7
579293	#N/A	#N/A	#N/A	#N/A	#N/A	#N/A	#N/A	#N/A	#N/A	0	0	0	0	0	0	2	0	5	0	0	0	0	0	0	0	13	0	0	0	0	0	0	4	Bacteria|Firmicutes|Clostridia|Clostridiales|Ruminococcaceae
277588	#N/A	#N/A	#N/A	#N/A	#N/A	#N/A	#N/A	#N/A	#N/A	0	1	0	0	0	0	1	0	0	1	0	0	0	0	1	0	1	0	0	0	0	0	0	0	Bacteria|Firmicutes|Clostridia|Clostridiales|Ruminococcaceae|Oscillospira
195508	#N/A	#N/A	#N/A	#N/A	#N/A	#N/A	#N/A	#N/A	#N/A	1	2	0	0	0	0	0	2	0	0	0	0	1	0	1	0	0	0	1	0	0	0	0	0	Bacteria|Bacteroidetes|Bacteroidia|Bacteroidales|Bacteroidaceae|Bacteroides|caccae
308802	#N/A	#N/A	#N/A	#N/A	#N/A	#N/A	#N/A	#N/A	#N/A	0	1	0	0	0	0	0	0	0	1	0	1	2	0	0	0	1	1	0	0	0	0	0	0	Bacteria|Firmicutes|Clostridia|Clostridiales|Clostridiaceae|SMB53
326567	9	0.215666	0	#N/A	#N/A	#N/A	8	-0.408248	0	0	4	0	1	6	1	4	1	0	1	0	0	0	0	0	0	0	0	1	0	4	4	3	1	Bacteria|Firmicutes|Clostridia|Clostridiales
[truncated: 114 more rows]
