# Supplementary material for: The improvement effect of astaxanthin-loaded emulsions on obesity is better than that of astaxanthin in the oil phase
Source: Royal Society of Chemistry journal article supplement (doi:10.1039/d1fo03185f), 2022-01-01
Supplement: d1fo03185f4.pdf [file d1fo03185f4.pdf]

**Table S3.** The partial Mantel test revealed the correlation between node connectivity of some taxa and the OTU significance of physiological traits in microbial co-occurrence networks.

| Treatment group | Physiological parameter | Taxon (Level)               | <i>r</i> (Correlation coefficient) | Significance (Probability) |
|-----------------|-------------------------|-----------------------------|------------------------------------|----------------------------|
| M               | Lee's index             | Butyricimonas (Genus)       | 0.8169                             | 0.0500                     |
| M               | adipose tissue weight   | Butyricimonas (Genus)       | 0.9485                             | 0.0500                     |
| M               | adipocytes diameter     | Clostridiaceae (Family)     | 0.7574                             | 0.0250                     |
| MA              | TBARS                   | Lactobacillaceae (Family)   | 0.9162                             | 0.0333                     |
| MA              | TBARS                   | Lactobacillus (Genus)       | 0.9162                             | 0.0333                     |
| MA              | ALT                     | Porphyromonadaceae (Family) | 0.7790                             | 0.0100                     |
| MA              | ALT                     | Parabacteroides (Genus)     | 0.7790                             | 0.0040                     |
| MA              | ALT                     | distasonis (Species)        | 0.9016                             | 0.0111                     |
| MAL             | TBARS                   | [Odoribacteraceae] (Family) | 0.5789                             | 0.0450                     |
| MAL             | TBARS                   | Butyricimonas (Genus)       | 0.5042                             | 0.0444                     |

ALT: alanine aminotransferase; TBARS: thiobarbituric acid reactive substances; M: high-fat and high-sucrose diet + saline; MA: high-fat and high-sucrose diet + astaxanthin in oil phase; MAL: high-fat and high-sucrose diet + astaxanthin-loaded emulsion. The mice were supplemented with astaxanthin for 4 weeks at a daily dose of 30 mg/kg body weight after the mice were fed with a normal or high-fat and high-sucrose diet for 8 weeks.
